# Supplementary material for: Synthesis of 3C-alkylated active methylene substituted 2H-indazole derivatives via sequential ring opening of donor–acceptor cyclopropanes and reductive cyclization reaction
Source: Royal Society of Chemistry journal article supplement (doi:10.1039/d2nj01801b), 2022-01-01

**Synthesis of 3C-alkylated active methylene substituted 2H-indazole derivatives via sequential ring opening of donor acceptor cyclopropanes and reductive cyclization reaction**

Archana Kumari Sahu, Subhamoy Biswas, Surjya Kumar Bora and Anil K Saikia\*

**Table of content**

|                         |               |
|-------------------------|---------------|
| 1. Experimental section | <b>S2-S38</b> |
|-------------------------|---------------|

# HRMS Spectrum of **1b'**

C:\Users\CHEL-005\Downloads\C1

08-03-2022 10:31:02

C1 #182 RT: 1.73 AV: 1 NL: 2.31E5  
T: FTMS - p ESI Full ms [150.00-2000.00]

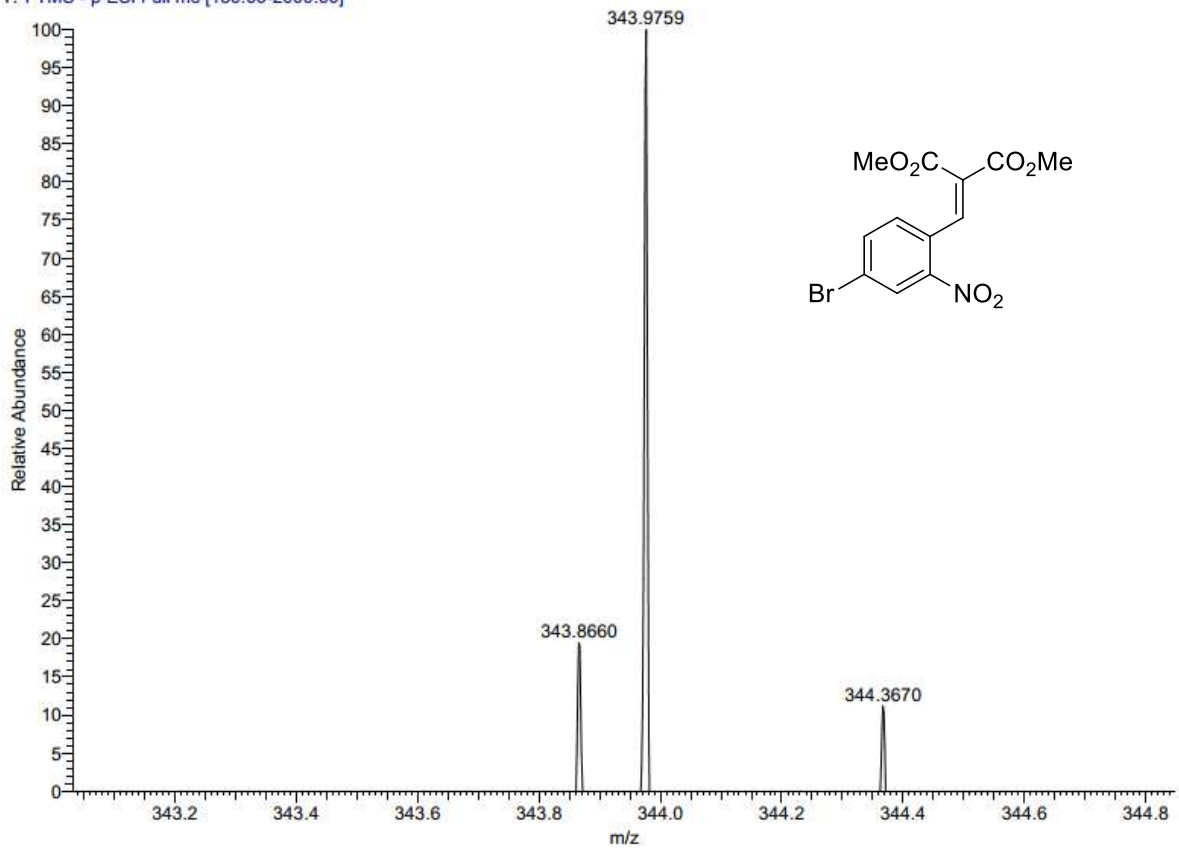

# HRMS Spectrum of 1c'

C:\Users\CHEL-005\Downloads\C2

08-03-2022 10:37:20

C2 #42 RT: 0.40 AV: 1 NL: 4.87E6  
T: FTMS - p ESI Full ms [150.00-2000.00]

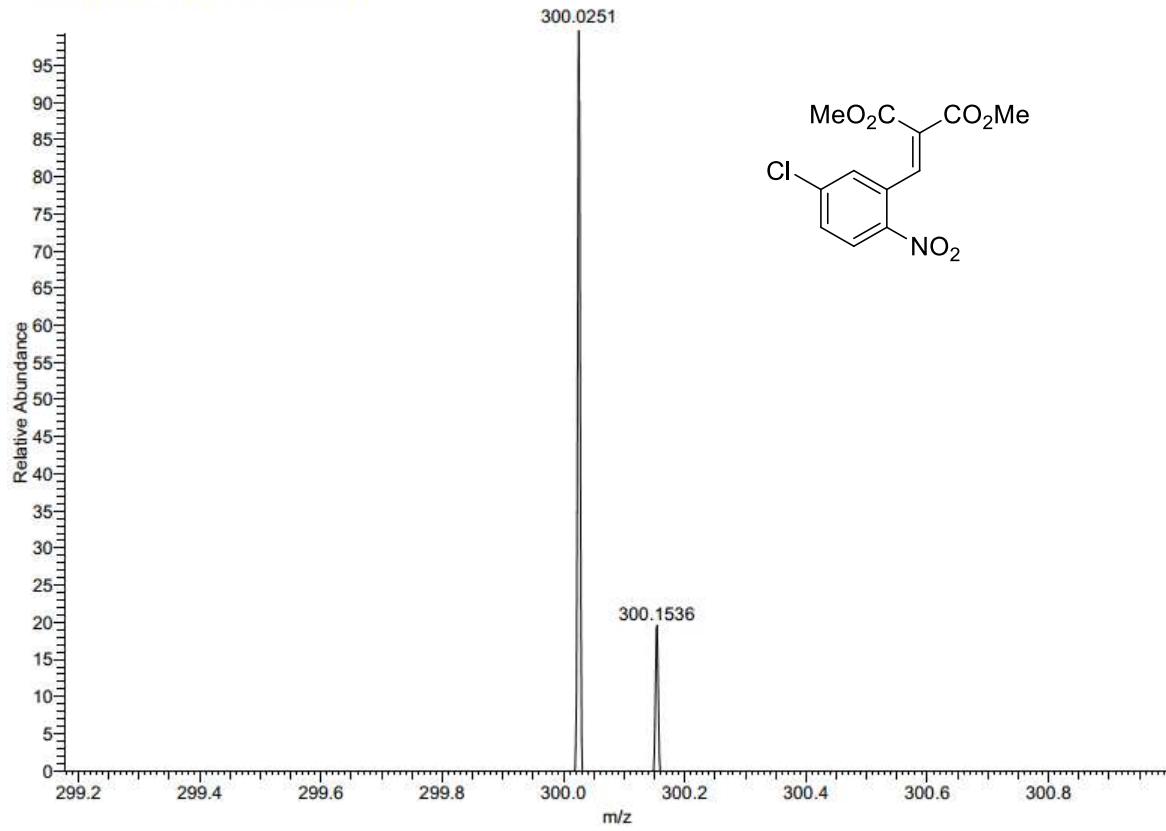

# HRMS Spectrum of **1d'**

C:\Users\CHEL-005\Downloads\c3

07-03-2022 10:18:45

c3 #182 RT: 1.85 AV: 1 NL: 3.57E3  
T: FTMS - p ESI Full ms [200.00-1000.00]

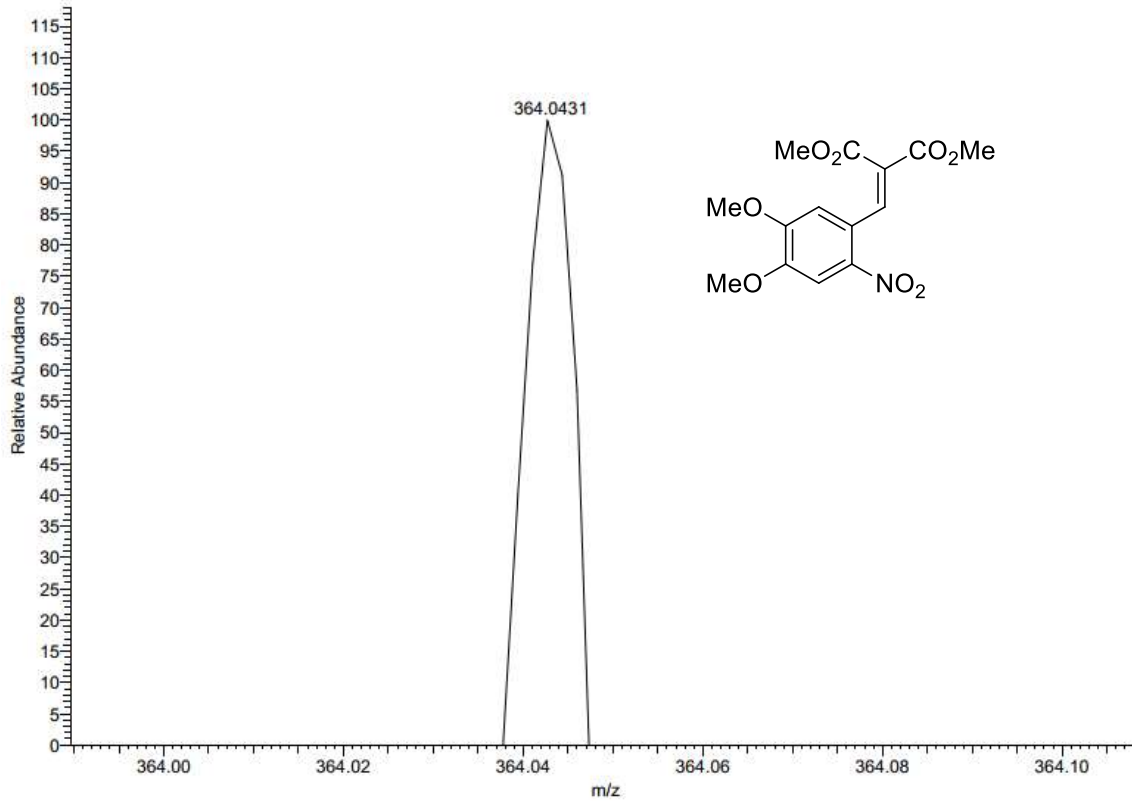

# HRMS Spectrum of 1e'

|             |                      |                        |         |                 |                                 |
|-------------|----------------------|------------------------|---------|-----------------|---------------------------------|
| Sample Name | CON_5_F              | Position               | P1-A7   | Instrument Name | Instrument 1                    |
| User Name   |                      | Inj Vol                | 10      | InjPosition     |                                 |
| Sample Type | Sample               | IRM Calibration Status | Success | Data Filename   | CON_5_F_022.d                   |
| ACQ Method  | FULL SCAN-POSITIVE.m | Comment                |         | Acquired Time   | 01-06-2022 16:19:43 (UTC+05:30) |

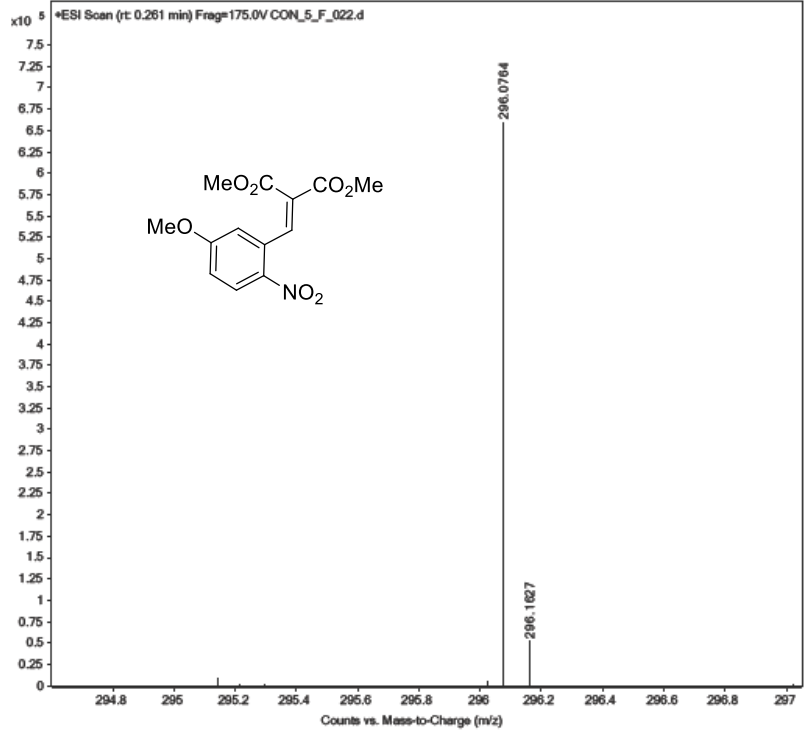

# HRMS Spectrum of **1b**

C:\Users\CHEL-005\Downloads\SM1

22-03-2022 12:29:07

SM1 #13 RT: 0.12 AV: 1 NL: 6.49E4  
T: FTMS + p ESI Full ms [150.00-2000.00]

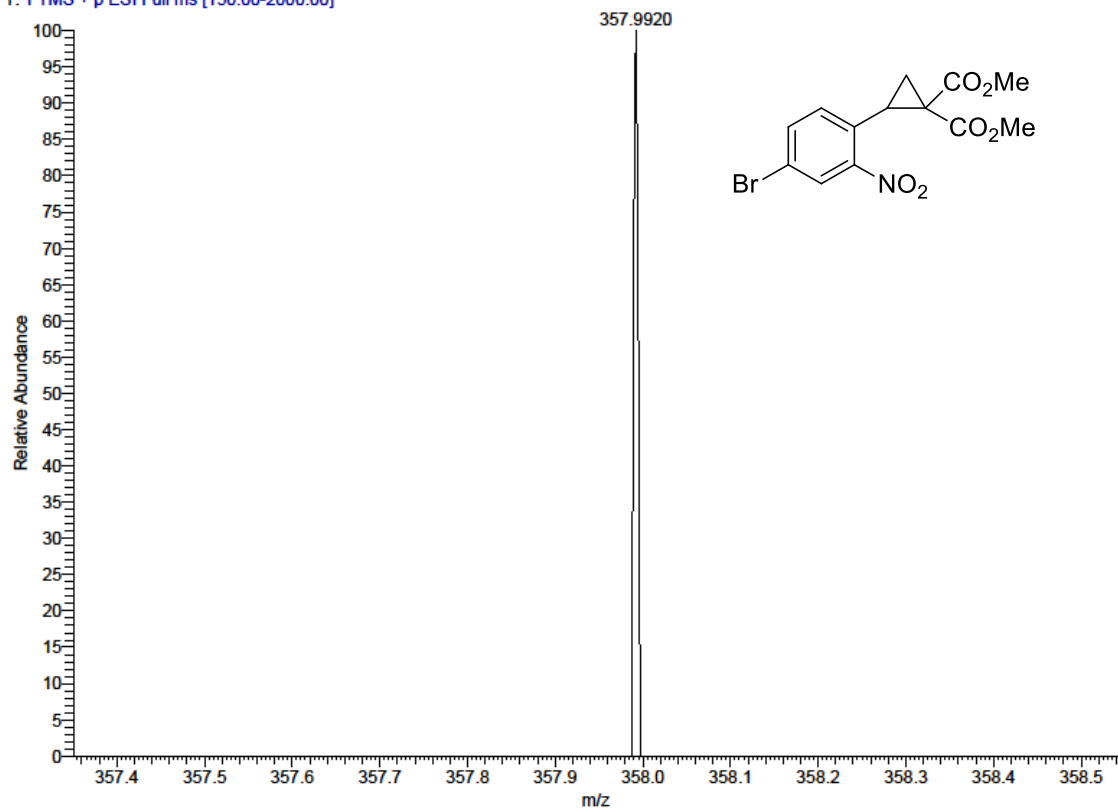

# HRMS Spectrum of **1c**

C:\Users\...Fw\_lc\_ms\_data\SM2

11-03-2022 12:35:43

SM2 #76 RT: 0.72 AV: 1 NL: 3.16E4  
T: FTMS - p ESI Full ms [150.00-2000.00]

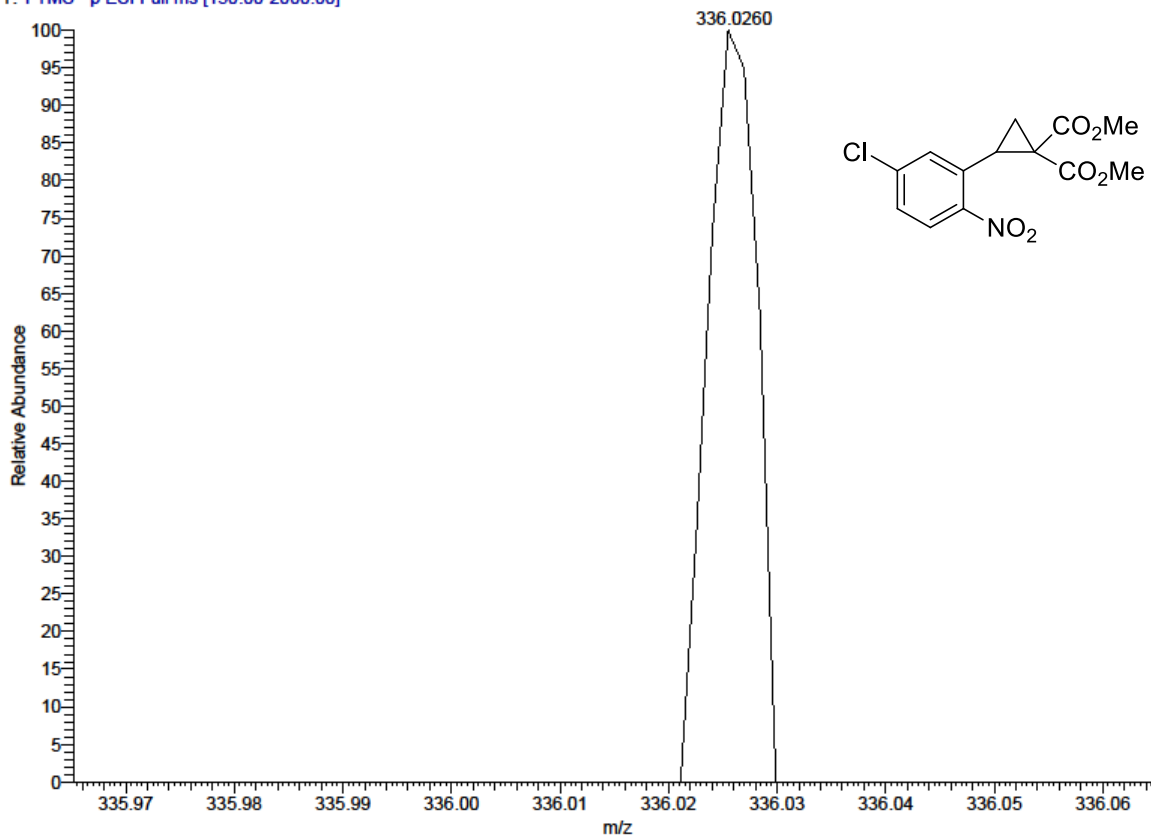

# HRMS Spectrum of **1d**

C:\Users\...Fw\_lc\_ms\_data\SM3

11-03-2022 12:41:59

SM3 #28 RT: 0.26 AV: 1 NL: 4.26E4  
T: FTMS - p ESI Full ms [150.00-2000.00]

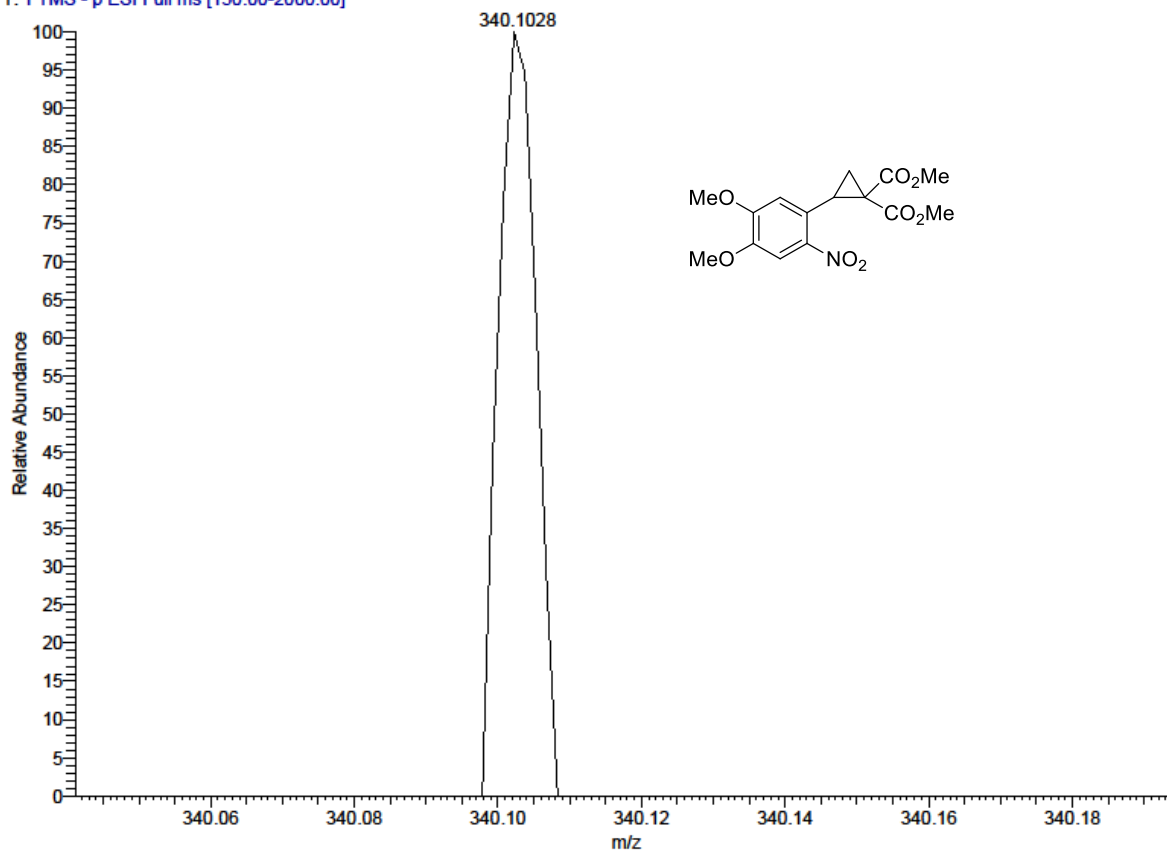



# HRMS Spectrum of **1e**

C:\Users\CHEL-005\Downloads\SM4

22-03-2022 12:35:28

SM4 #172 RT: 1.65 AV: 1 NL: 1.36E4  
T: FTMS - p ESI Full ms [150.00-2000.00]

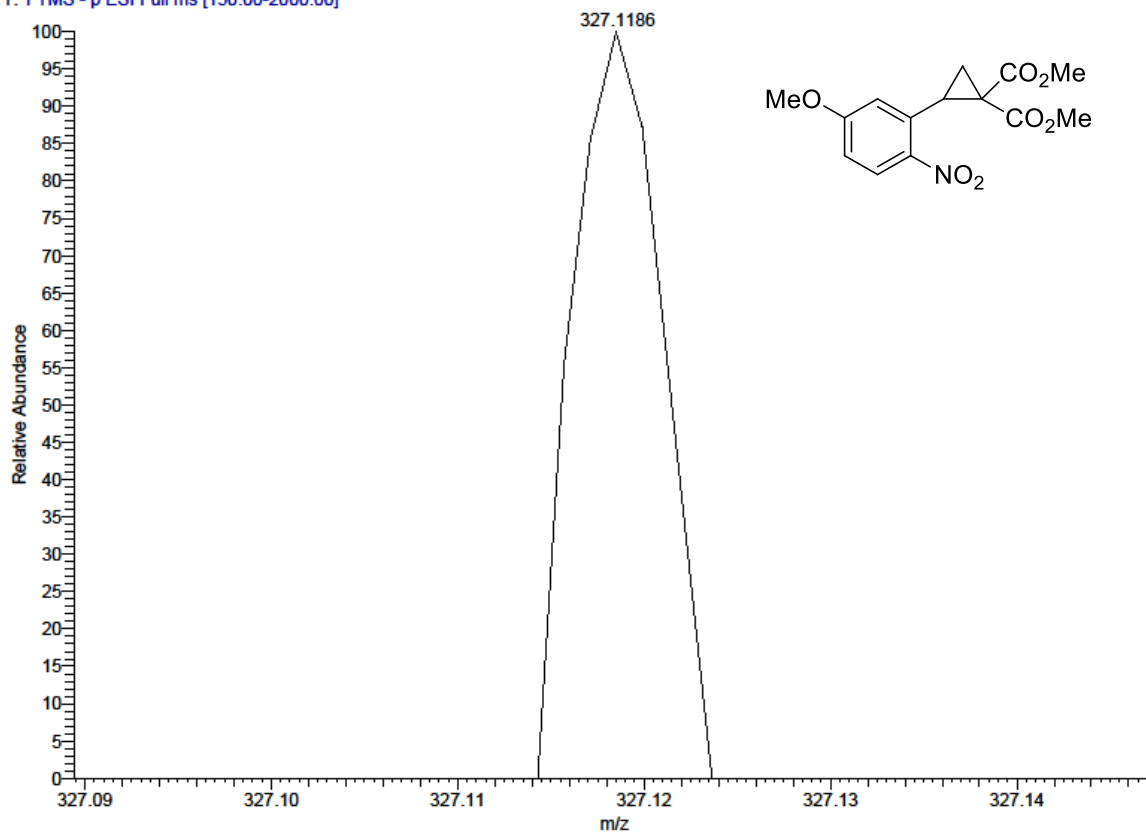

# HRMS Spectrum of **1f**

|             |                      |                        |         |                 |                                 |
|-------------|----------------------|------------------------|---------|-----------------|---------------------------------|
| Sample Name | SM_5_F               | Position               | P1-A6   | Instrument Name | Instrument 1                    |
| User Name   |                      | Inj Vol                | 10      | InjPosition     |                                 |
| Sample Type | Sample               | IRM Calibration Status | Success | Data Filename   | SM_5_F_021.d                    |
| ACQ Method  | FULL SCAN-POSITIVE.m | Comment                |         | Acquired Time   | 01-06-2022 16:17:51 (UTC+05:30) |

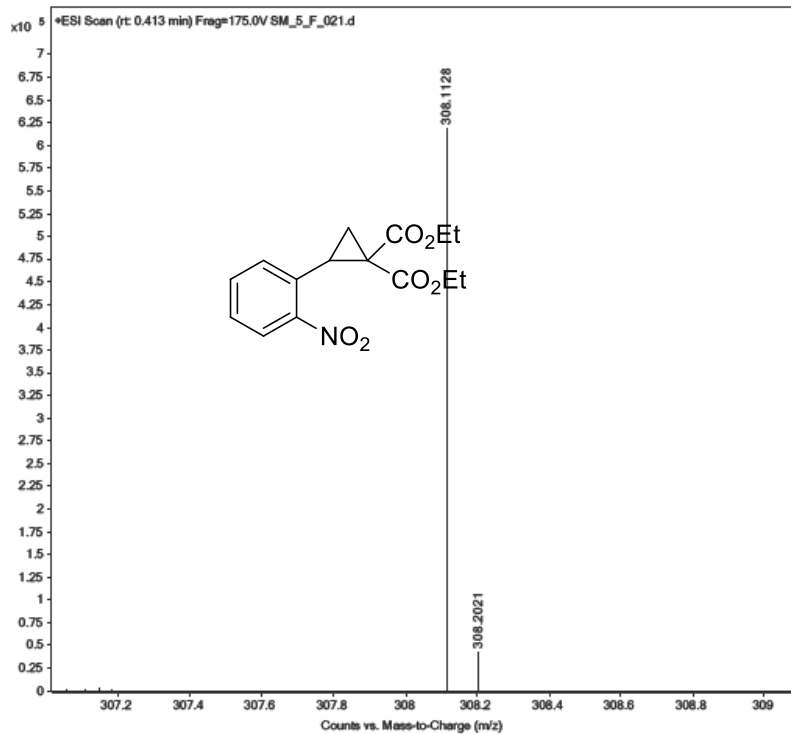

# HRMS Spectrum of **3aa'**

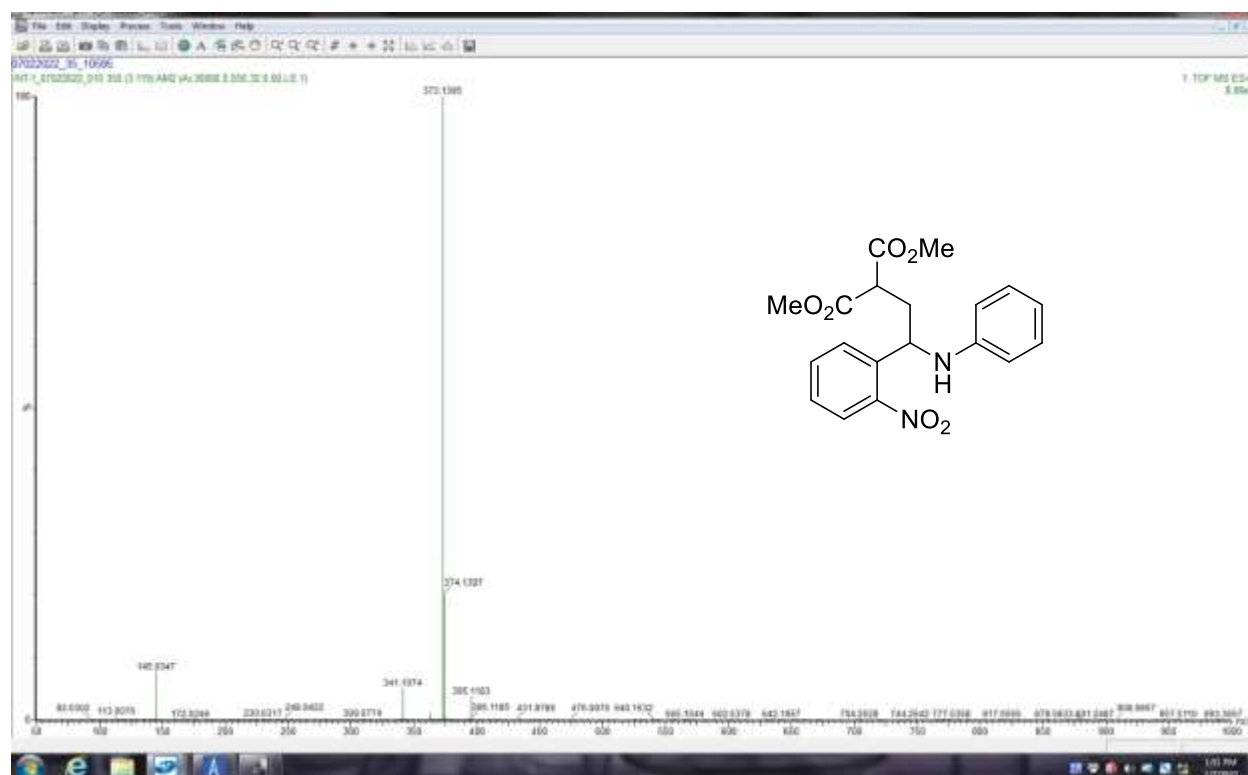

## HRMS Spectrum of 3aa

|             |                   |                        |         |                 |                                 |
|-------------|-------------------|------------------------|---------|-----------------|---------------------------------|
| Sample Name | SAMPLE            | Position               | PI-CS   | Instrument Name | Instrument 1                    |
| User Name   |                   | Inj Vol                | 20      | InjPosition     |                                 |
| Sample Type | Sample            | IRM Calibration Status | Success | Data Filename   | ARC-CP-RD-P.d                   |
| Acq Method  | ESI ALS 200-500.n | Comment                |         | Acquired Time   | 05-08-2021 13:42:21 (UTC+05:30) |

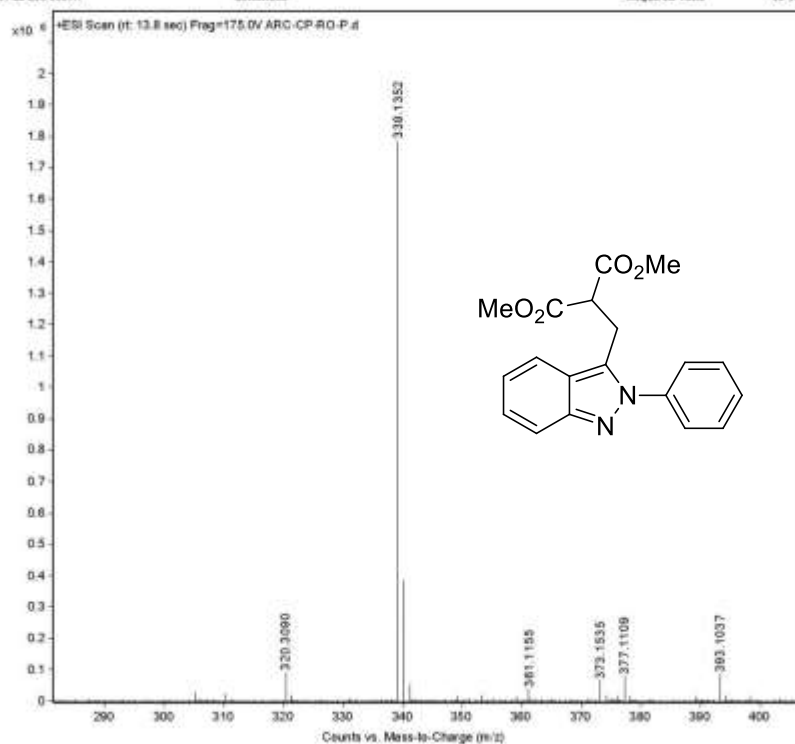

## HRMS Spectrum of **3ab**

|             |                    |                        |         |                 |                                 |
|-------------|--------------------|------------------------|---------|-----------------|---------------------------------|
| Sample Name | DMM-PME-1          | Position               | P1-05   | Instrument Name | Instrument 1                    |
| User Name   |                    | Inj Vol                | 20      | InjPosition     |                                 |
| Sample Type | Sample             | IRN Calibration Status | Success | Data Filename   | DMM-PME-1.d                     |
| ACQ Method  | ESI ALS 000-0000.m | Comment                |         | Acquired Time   | 24-09-2021 17:26:00 (UTC+05:30) |

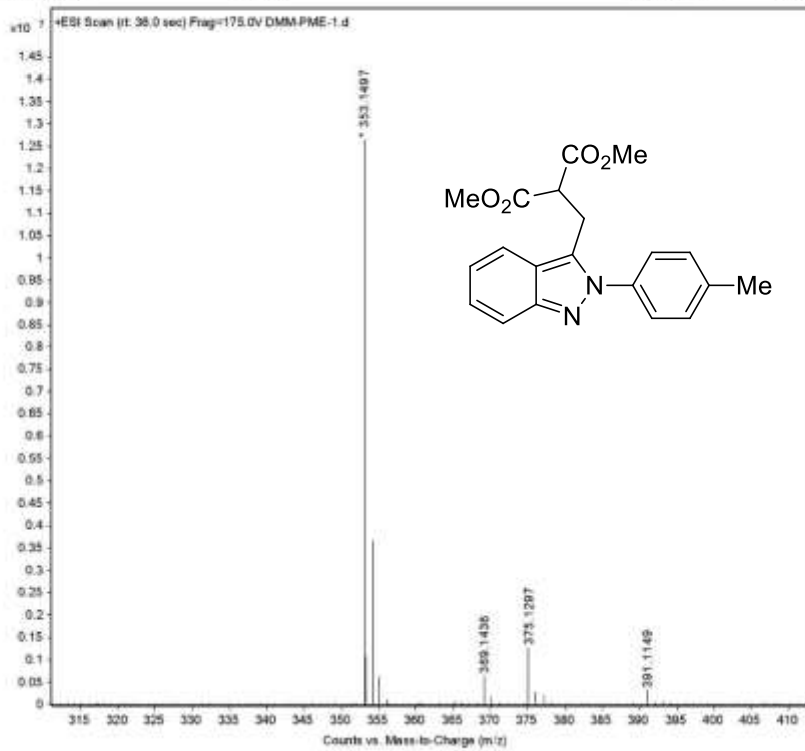

## HRMS Spectrum of **3ac**

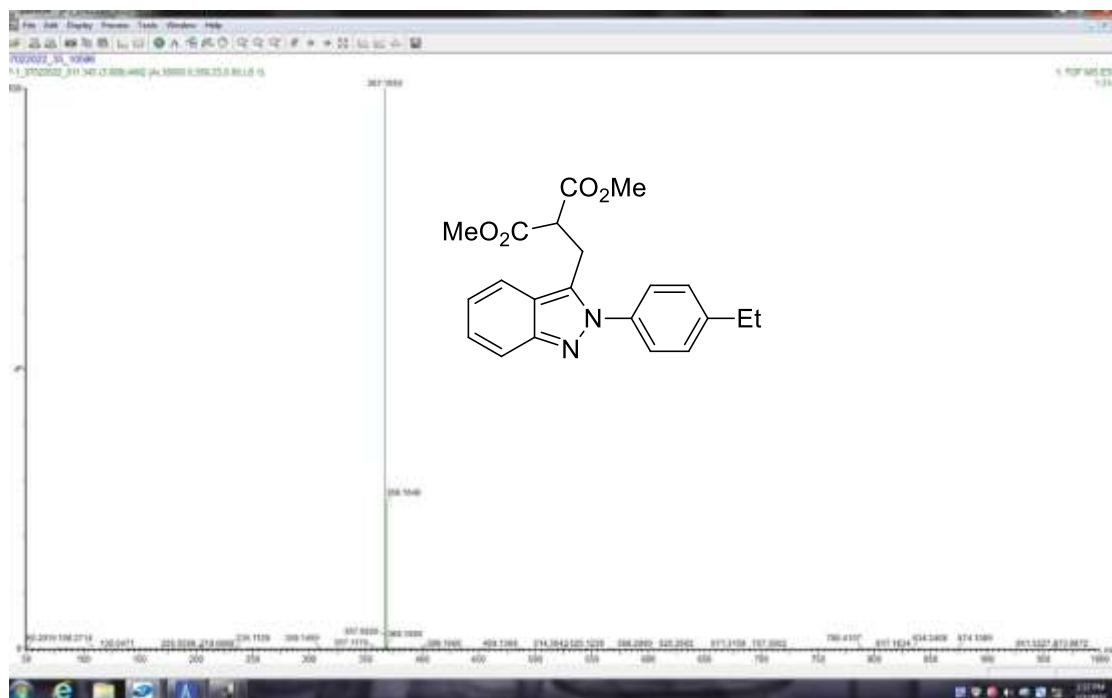

# HRMS Spectrum of 3ad

|                    |                   |                               |         |                        |                                 |
|--------------------|-------------------|-------------------------------|---------|------------------------|---------------------------------|
| <b>Sample Name</b> | WASH              | <b>Position</b>               | PI-C10  | <b>Instrument Name</b> | Instrument 1                    |
| <b>User Name</b>   |                   | <b>Inj Vol</b>                | 20      | <b>InjPosition</b>     |                                 |
| <b>Sample Type</b> | Sample            | <b>IRM Calibration Status</b> | Success | <b>Data Filename</b>   | DMM-BU.d                        |
| <b>ACQ Method</b>  | ESI ALS 100-500.m | <b>Comment</b>                |         | <b>Acquired Time</b>   | 30-08-2021 11:31:52 (UTC+05:30) |

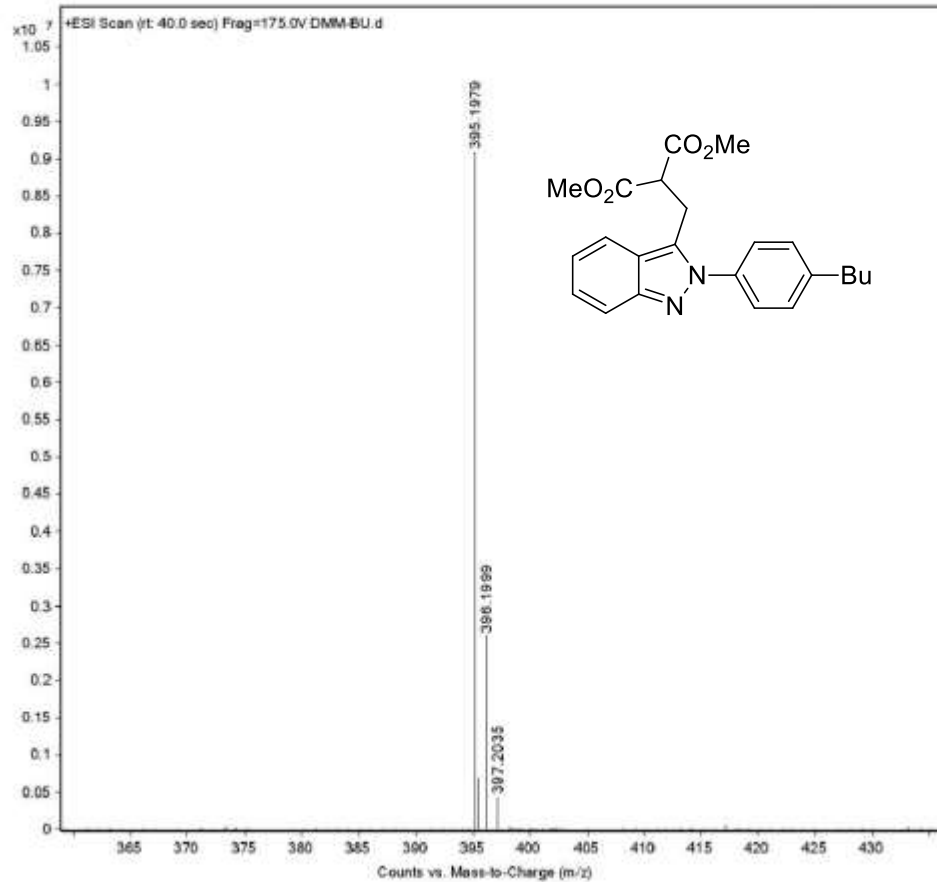

## HRMS Spectrum of 3ae

|                    |                   |                               |         |                        |                                 |
|--------------------|-------------------|-------------------------------|---------|------------------------|---------------------------------|
| <b>Sample Name</b> | WASH              | <b>Position</b>               | P1-C11  | <b>Instrument Name</b> | Instrument 1                    |
| <b>User Name</b>   |                   | <b>Inj Vol</b>                | 20      | <b>InjPosition</b>     |                                 |
| <b>Sample Type</b> | Sample            | <b>IRM Calibration Status</b> | Success | <b>Data Filename</b>   | DMM-TBU.d                       |
| <b>ACQ Method</b>  | ESI ALS 100-500.m | <b>Comment</b>                |         | <b>Acquired Time</b>   | 30-08-2021 11:35:49 (UTC+05:30) |

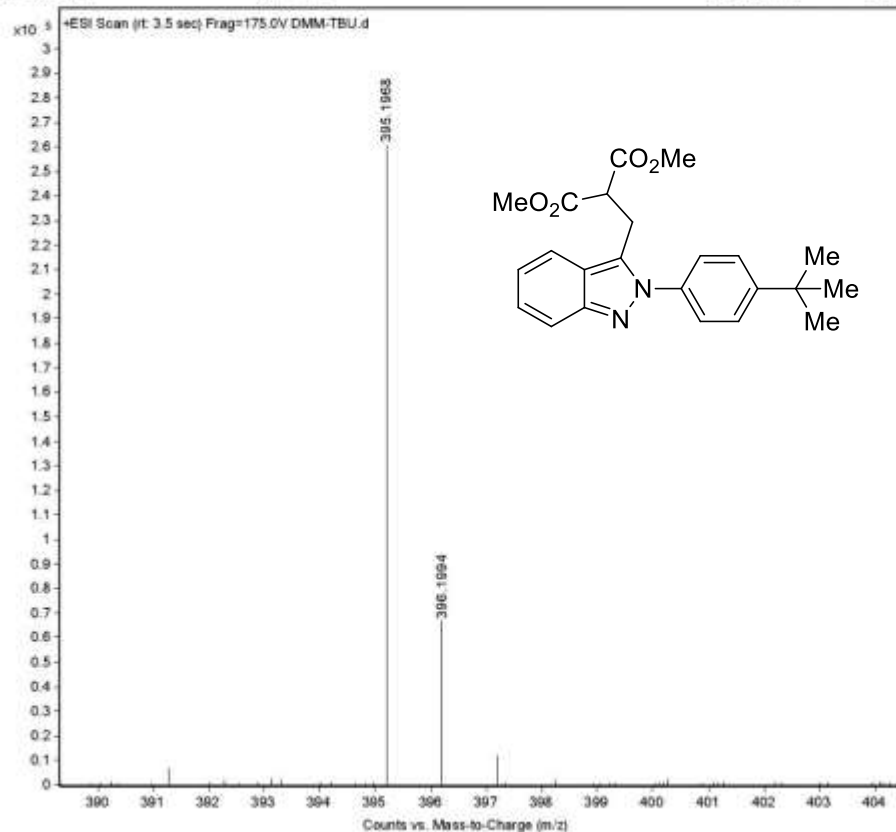



## HRMS Spectrum of 3af

|             |                    |                        |         |                 |                                 |
|-------------|--------------------|------------------------|---------|-----------------|---------------------------------|
| Sample Name | DMM-POME-1         | Position               | P1-C7   | Instrument Name | Instrument 1                    |
| User Name   |                    | Inj Vol                | 20      | InjPosition     |                                 |
| Sample Type | Sample             | IRM Calibration Status | Success | Data Filename   | DMM-POME-1.d                    |
| ACQ Method  | ESI ALS 100-1000.m | Comment                |         | Acquired Time   | 24-08-2021 17:27:47 (UTC+05:30) |

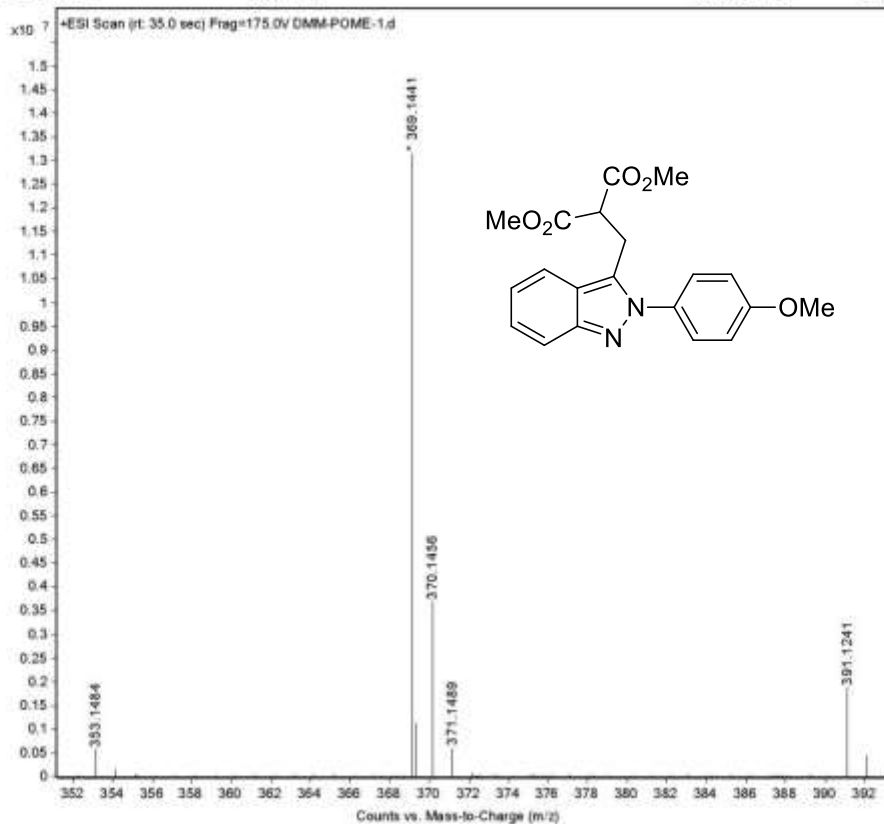

## HRMS Spectrum of **3ag**

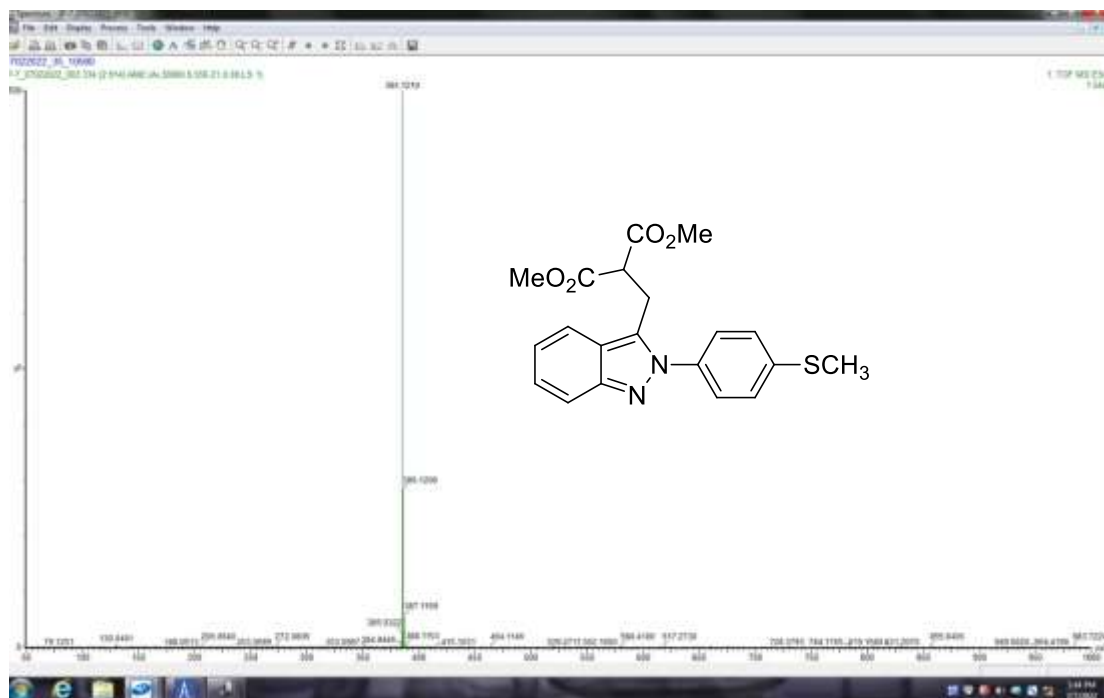

# HRMS Spectrum of **3ah**

|             |                      |                        |         |                 |                                 |
|-------------|----------------------|------------------------|---------|-----------------|---------------------------------|
| Sample Name | 3AH_F                | Position               | P1-A5   | Instrument Name | Instrument 1                    |
| User Name   |                      | Inj Vol                | 10      | InjPosition     |                                 |
| Sample Type | Sample               | IRM Calibration Status | Success | Data Filename   | 3AH_F_020.d                     |
| ACQ Method  | FULL SCAN-POSITIVE.m | Comment                |         | Acquired Time   | 01-06-2022 16:15:52 (UTC+05:30) |

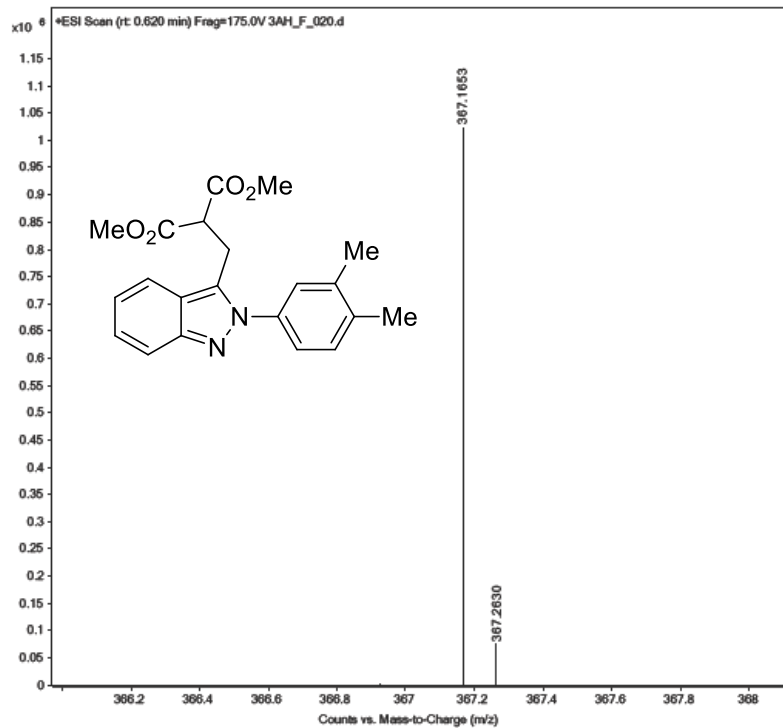

## HRMS Spectrum of **3ai**

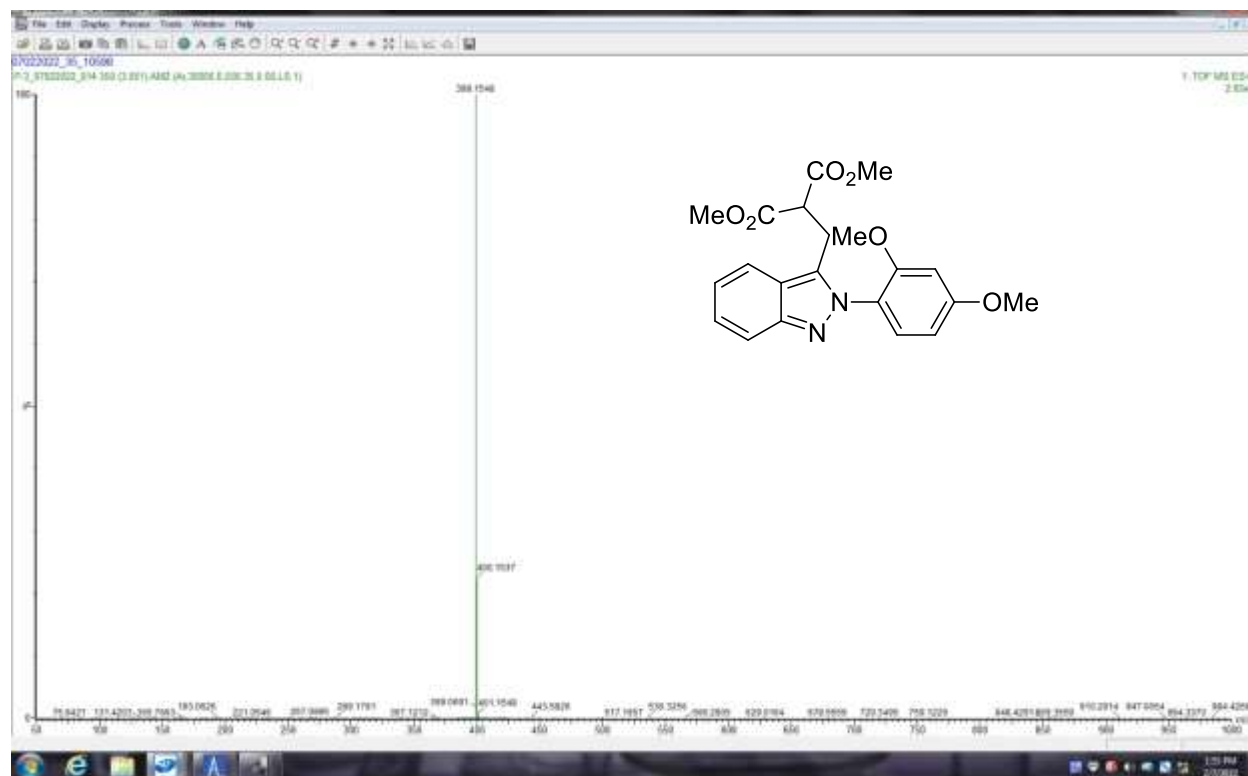

## HRMS Spectrum of **3aj**

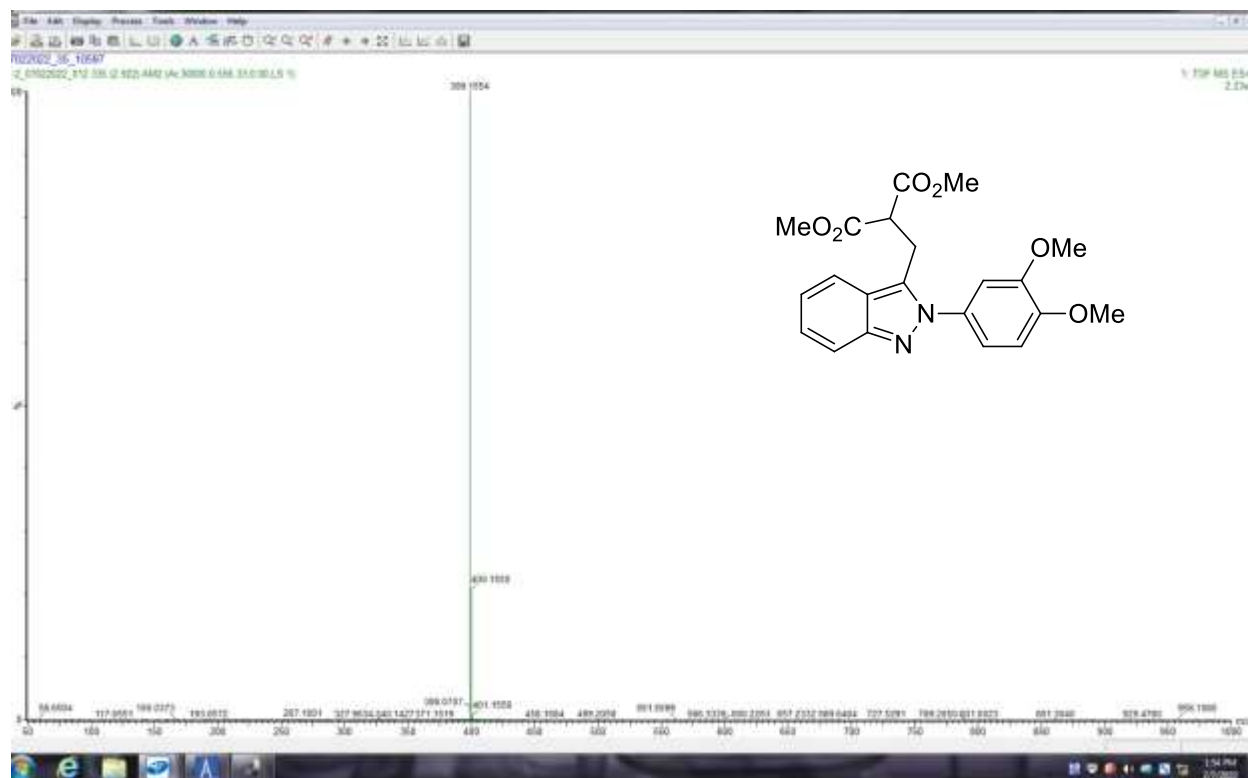

## HRMS Spectrum of **3ak**

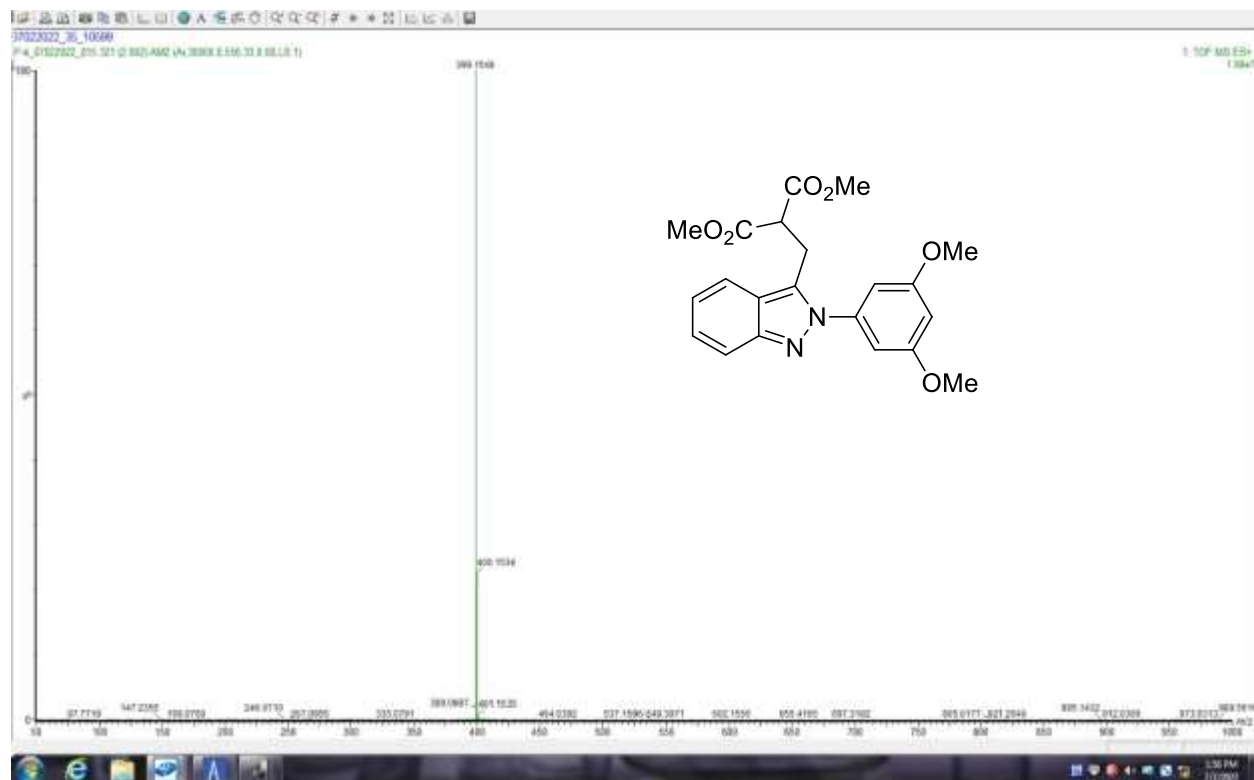

# HRMS Spectrum of 3aI

|                    |                   |                               |         |                        |                                 |
|--------------------|-------------------|-------------------------------|---------|------------------------|---------------------------------|
| <b>Sample Name</b> | DMM-PMDA-1        | <b>Position</b>               | P1-A4   | <b>Instrument Name</b> | Instrument 1                    |
| <b>User Name</b>   |                   | <b>Inj Vol</b>                | 30      | <b>InjPosition</b>     |                                 |
| <b>Sample Type</b> | Sample            | <b>IRM Calibration Status</b> | Success | <b>Data Filename</b>   | DMM-PMDA-1.d                    |
| <b>ACQ Method</b>  | ESI ALS 100-500.m | <b>Comment</b>                |         | <b>Acquired Time</b>   | 25-08-2021 10:45:06 (UTC+05:30) |

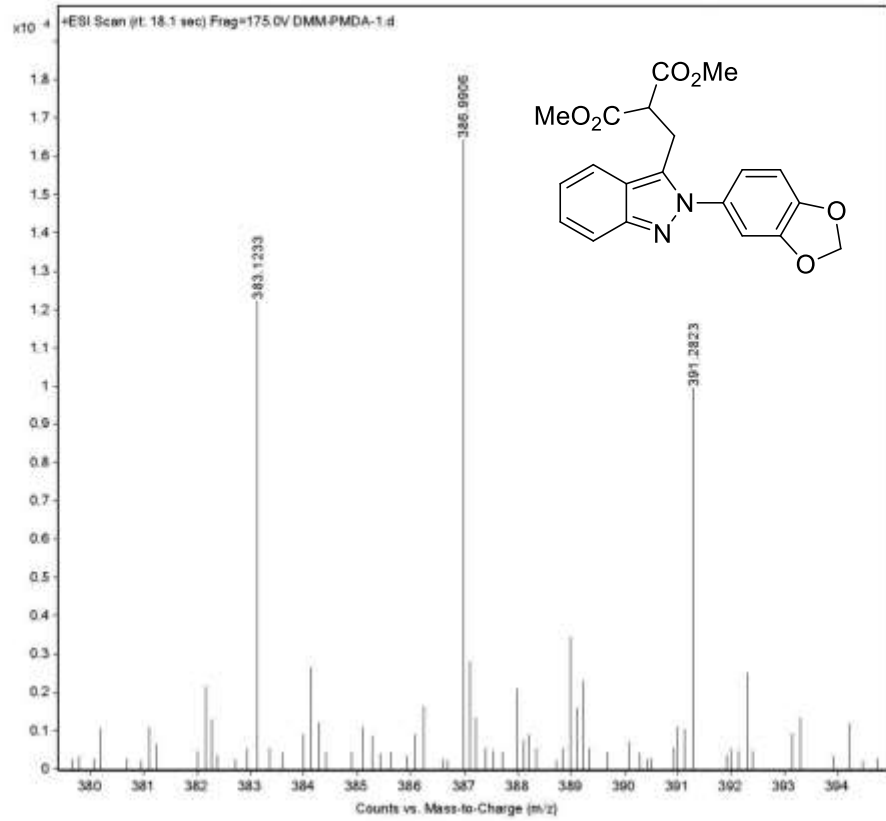

# HRMS Spectrum of **3am**

|                    |                   |                               |         |                        |                                 |
|--------------------|-------------------|-------------------------------|---------|------------------------|---------------------------------|
| <b>Sample Name</b> | WASH              | <b>Position</b>               | P1-03   | <b>Instrument Name</b> | Instrument 1                    |
| <b>User Name</b>   |                   | <b>Inj Vol</b>                | 20      | <b>InjPosition</b>     |                                 |
| <b>Sample Type</b> | Sample            | <b>IRM Calibration Status</b> | Success | <b>Data Filename</b>   | DMM-DIME.d                      |
| <b>ACQ Method</b>  | ESI ALS 100-500.m | <b>Comment</b>                |         | <b>Acquired Time</b>   | 20-08-2021 12:29:03 (UTC+05:30) |

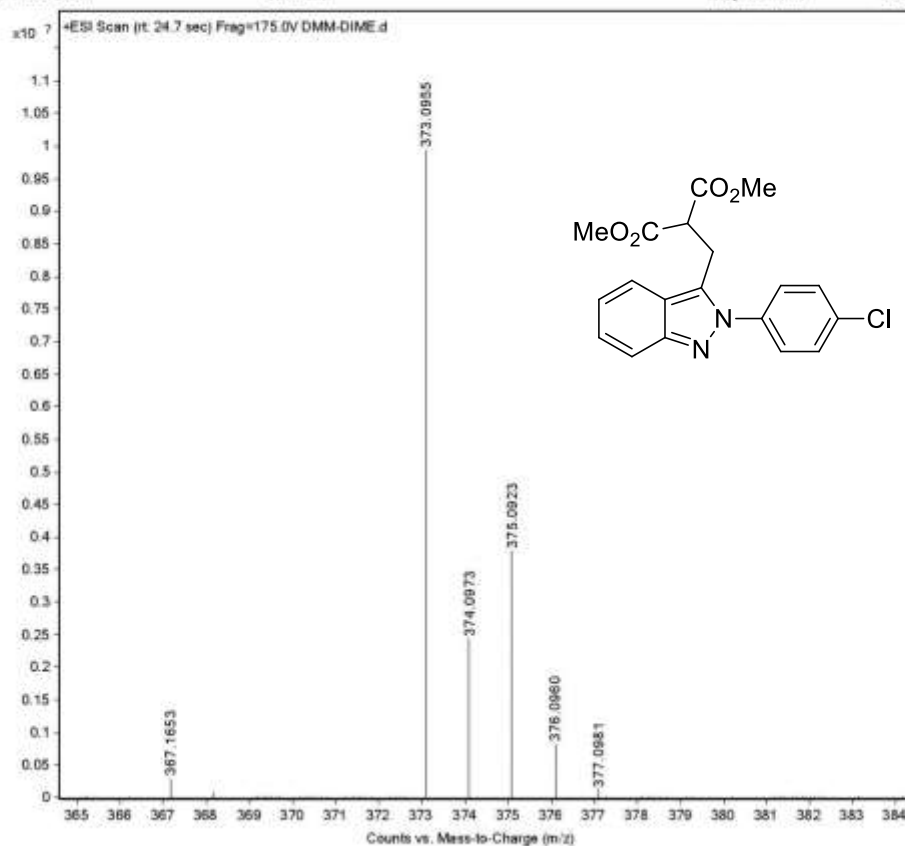



# HRMS Spectrum of 3an

|                    |                    |                               |         |                        |                                 |
|--------------------|--------------------|-------------------------------|---------|------------------------|---------------------------------|
| <b>Sample Name</b> | DMM-PBR-1          | <b>Position</b>               | P1-C5   | <b>Instrument Name</b> | Instrument 1                    |
| <b>User Name</b>   |                    | <b>Inj Vol</b>                | 20      | <b>InjPosition</b>     |                                 |
| <b>Sample Type</b> | Sample             | <b>IRM Calibration Status</b> | Success | <b>Data Filename</b>   | DMM-PBR-1.d                     |
| <b>ACQ Method</b>  | ESI ALS 100-1000.m | <b>Comment</b>                |         | <b>Acquired Time</b>   | 24-08-2021 17:19:46 (UTC+05:30) |

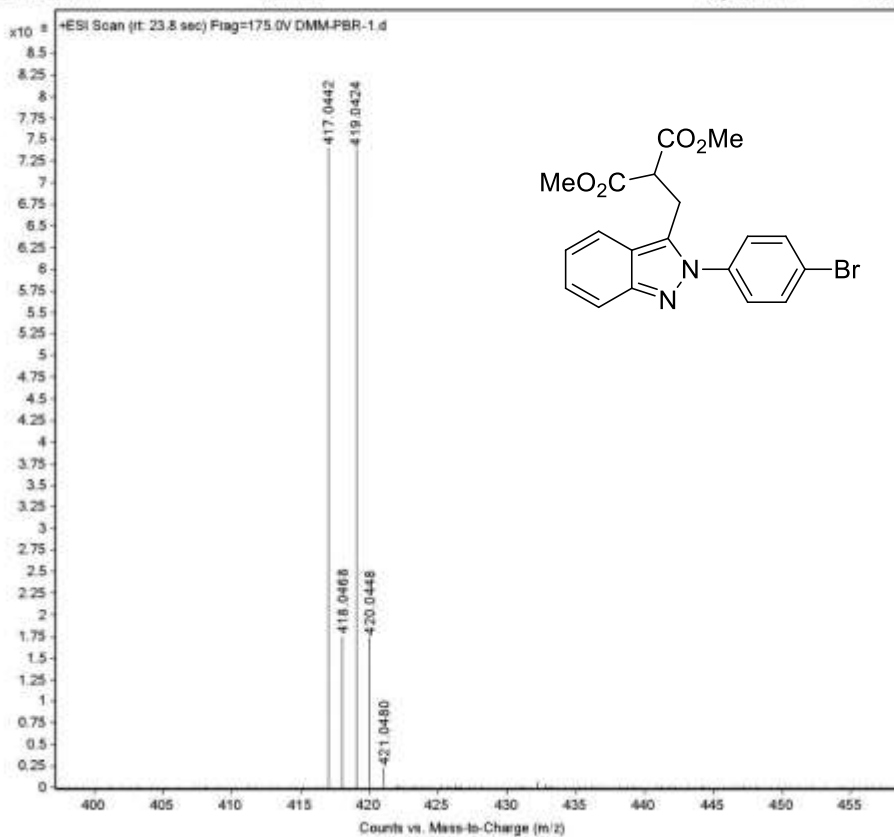

# HRMS Spectrum of 3ao

|                    |                   |                               |         |                        |                                 |
|--------------------|-------------------|-------------------------------|---------|------------------------|---------------------------------|
| <b>Sample Name</b> | DMM-PF1           | <b>Position</b>               | PL-A3   | <b>Instrument Name</b> | Instrument 1                    |
| <b>User Name</b>   |                   | <b>Inj Vol</b>                | 30      | <b>InjPosition</b>     |                                 |
| <b>Sample Type</b> | Sample            | <b>IRM Calibration Status</b> | Success | <b>Data Filename</b>   | DMM-PF1.d                       |
| <b>ACQ Method</b>  | ESI ALS 100-500.m | <b>Comment</b>                |         | <b>Acquired Time</b>   | 25-08-2021 10:39:10 (UTC+05:30) |

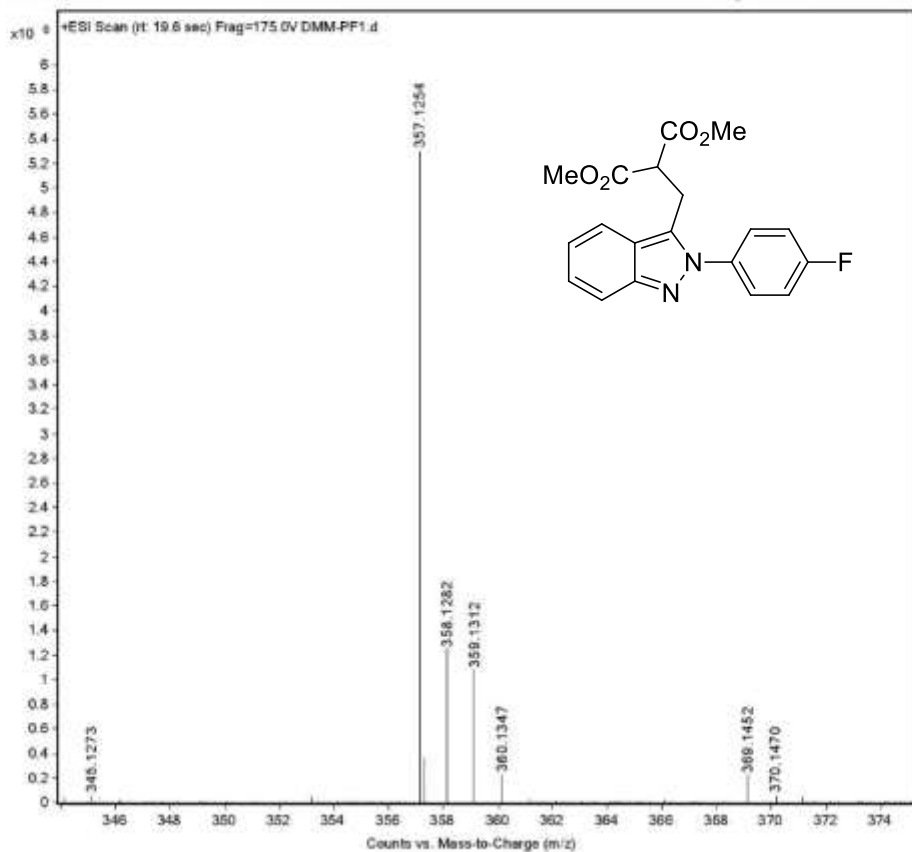

# HRMS Spectrum of 3ap

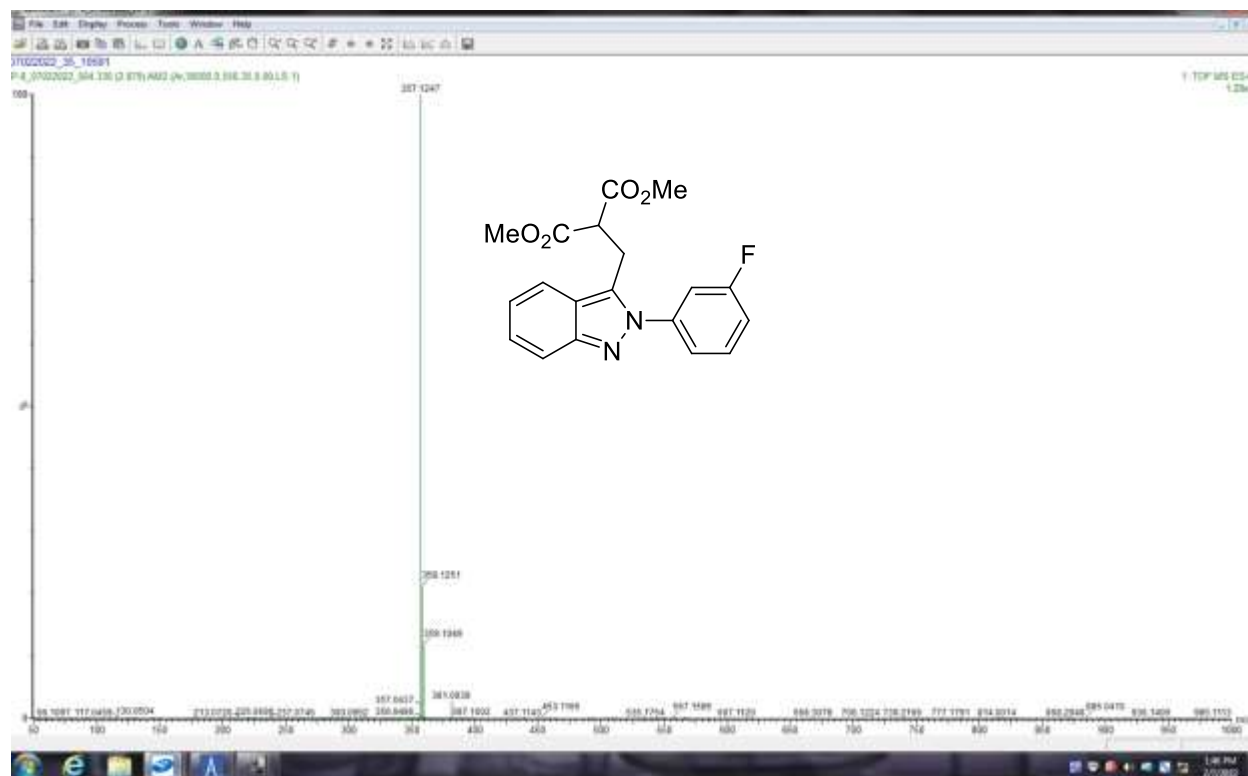

# HRMS Spectrum of 3aq

|                    |                    |                               |         |                        |                                 |
|--------------------|--------------------|-------------------------------|---------|------------------------|---------------------------------|
| <b>Sample Name</b> | DMM-MCF3           | <b>Position</b>               | P1-80   | <b>Instrument Name</b> | Instrument 1                    |
| <b>User Name</b>   |                    | <b>Inj Vol</b>                | 20      | <b>InjPosition</b>     |                                 |
| <b>Sample Type</b> | Sample             | <b>IRM Calibration Status</b> | Success | <b>Data Filename</b>   | DMM-MCF3.d                      |
| <b>ACQ Method</b>  | ESQ ALS 100-1000.m | <b>Comment</b>                |         | <b>Acquired Time</b>   | 07-09-2021 11:39:03 (UTC+09:30) |

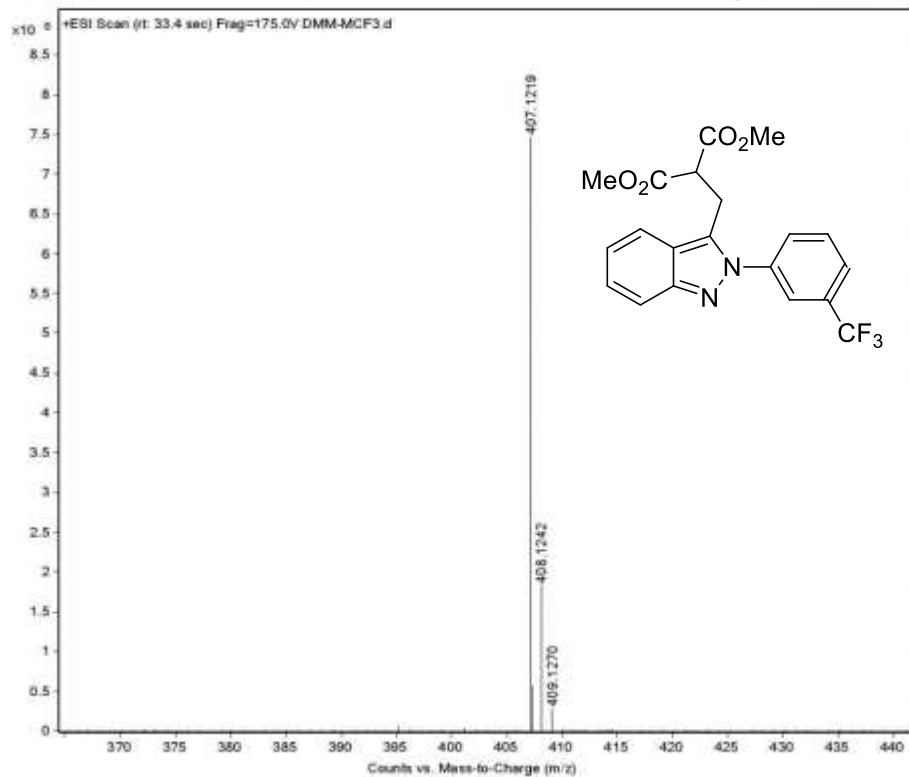

# HRMS Spectrum of 3ar

|             |                    |                        |         |                 |                                 |
|-------------|--------------------|------------------------|---------|-----------------|---------------------------------|
| Sample Name | DMM-PCO2ME-1       | Position               | F1-C8   | Instrument Name | Instrument 1                    |
| User Name   |                    | Inj Vol                | 20      | InjPosition     |                                 |
| Sample Type | Sample             | IRM Calibration Status | Success | Data Filename   | DMM-PCO2ME-1.d                  |
| ACQ Method  | ESI ALS 100-1000.m | Comment                |         | Acquired Time   | 24-08-2021 17:31:33 (UTC+05:30) |

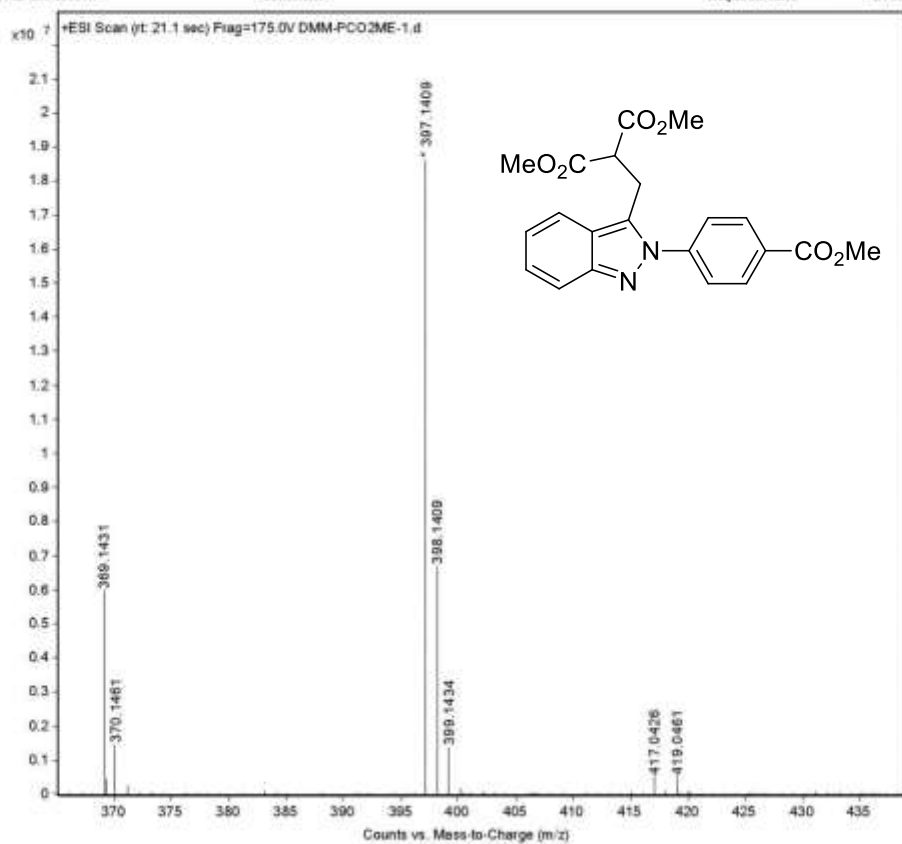

## HRMS Spectrum of **3ba**

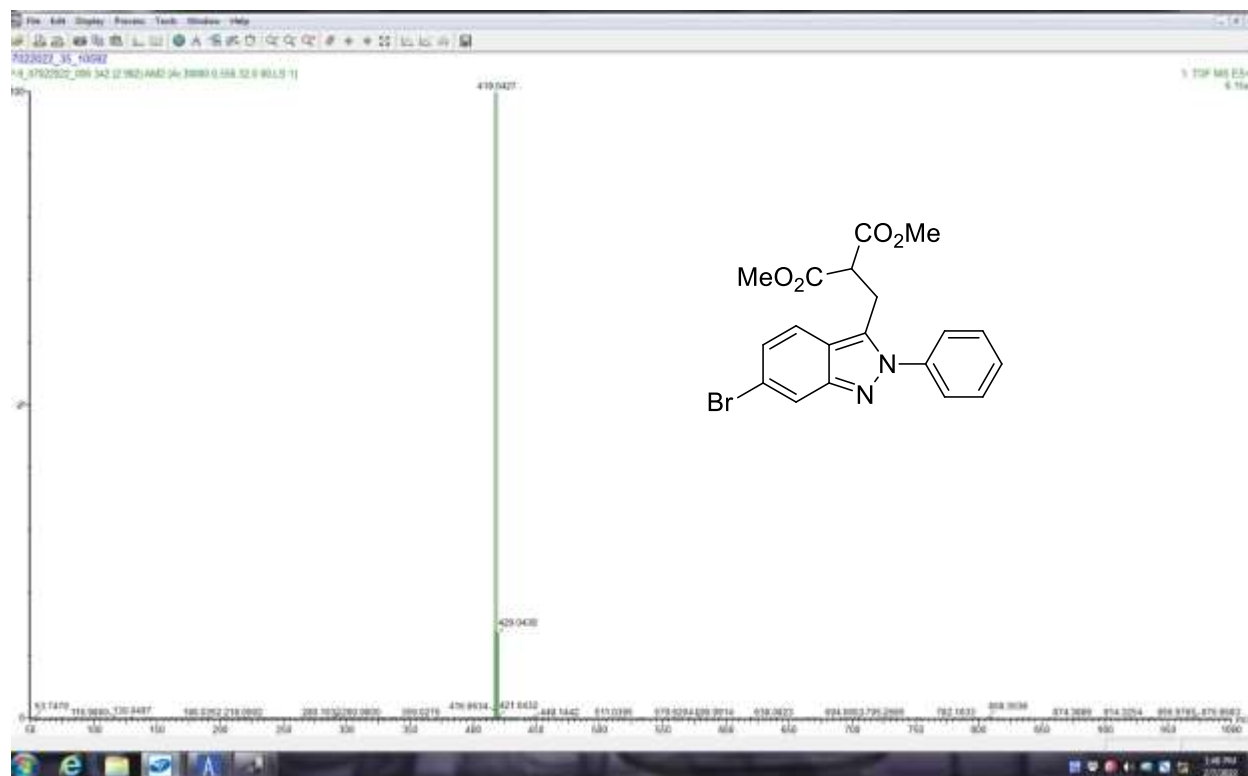

# HRMS Spectrum of 3ca

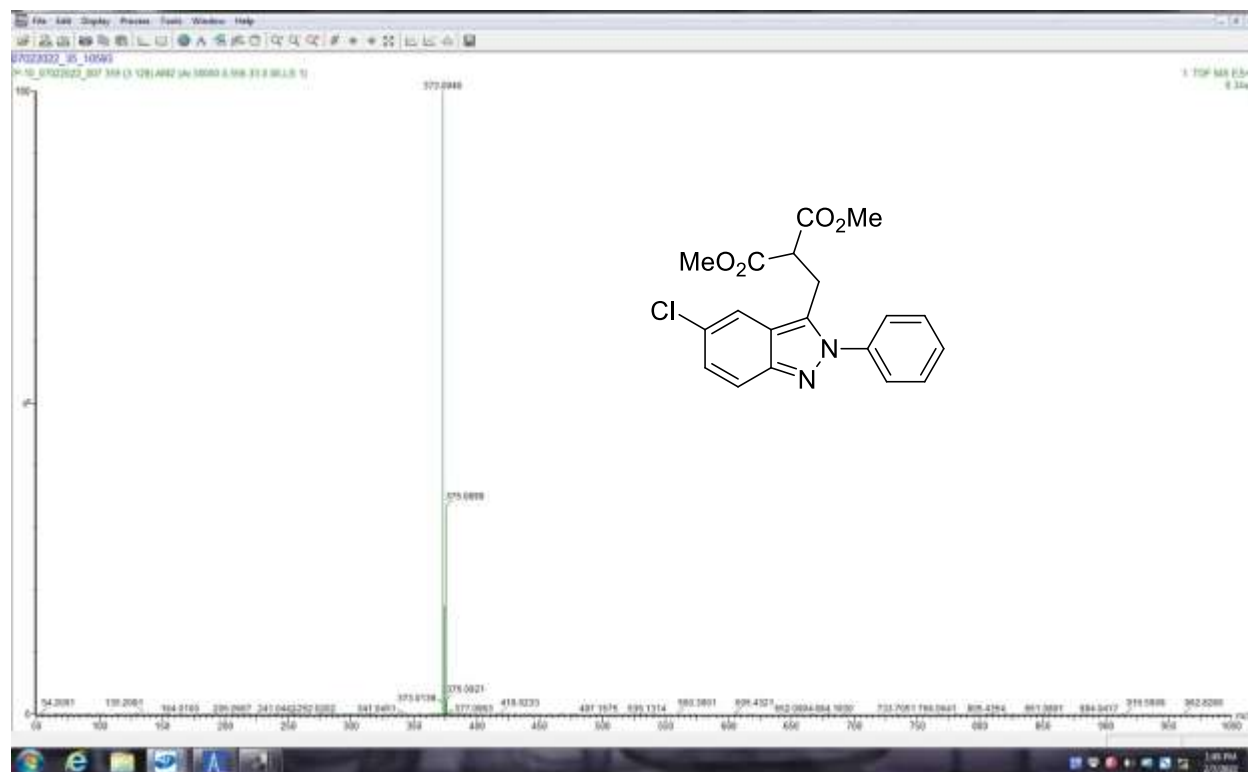

## HRMS Spectrum of 3da

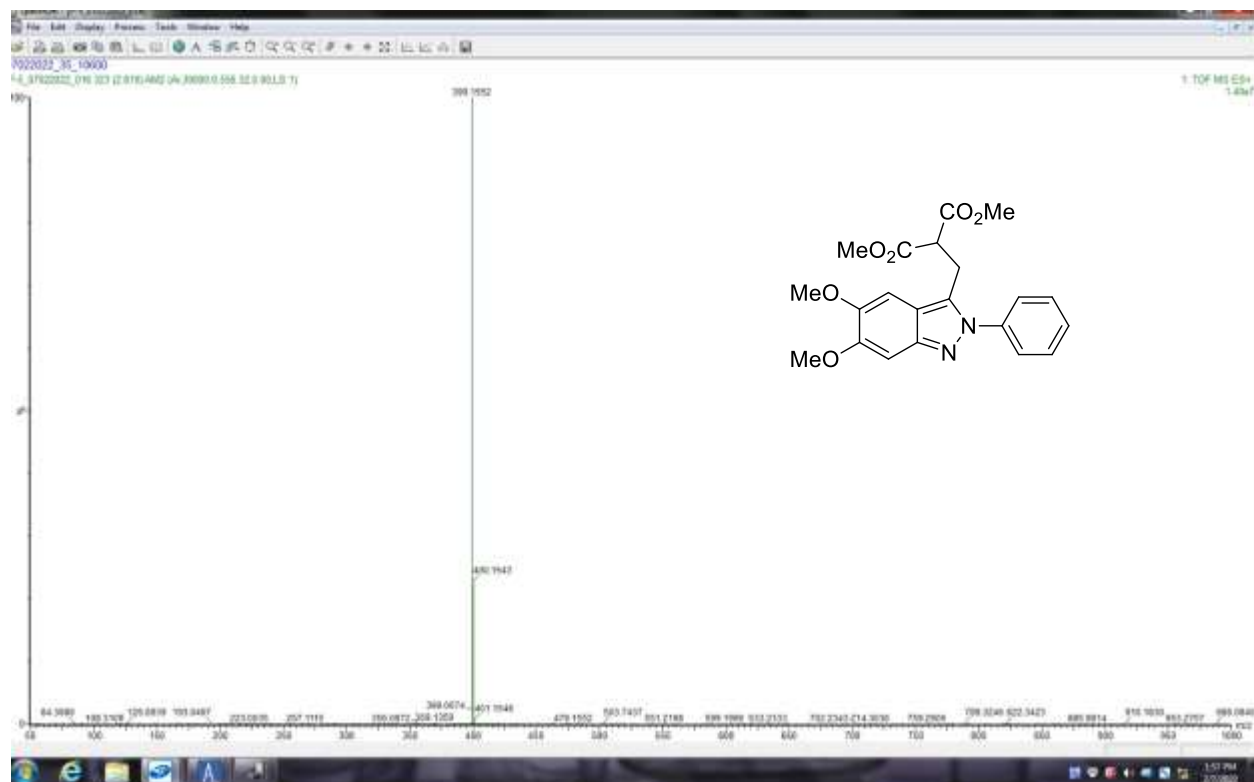



## HRMS Spectrum of **3ef**

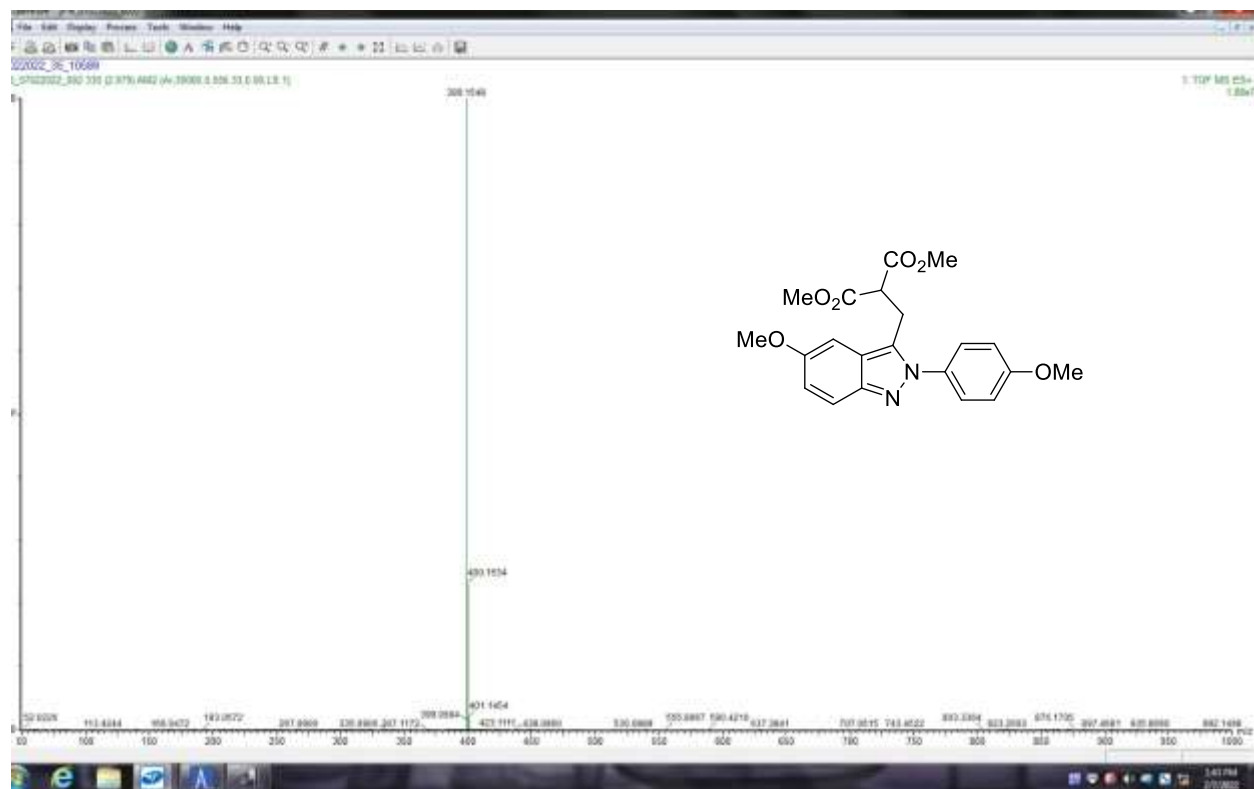

# HRMS Spectrum of **3fa**

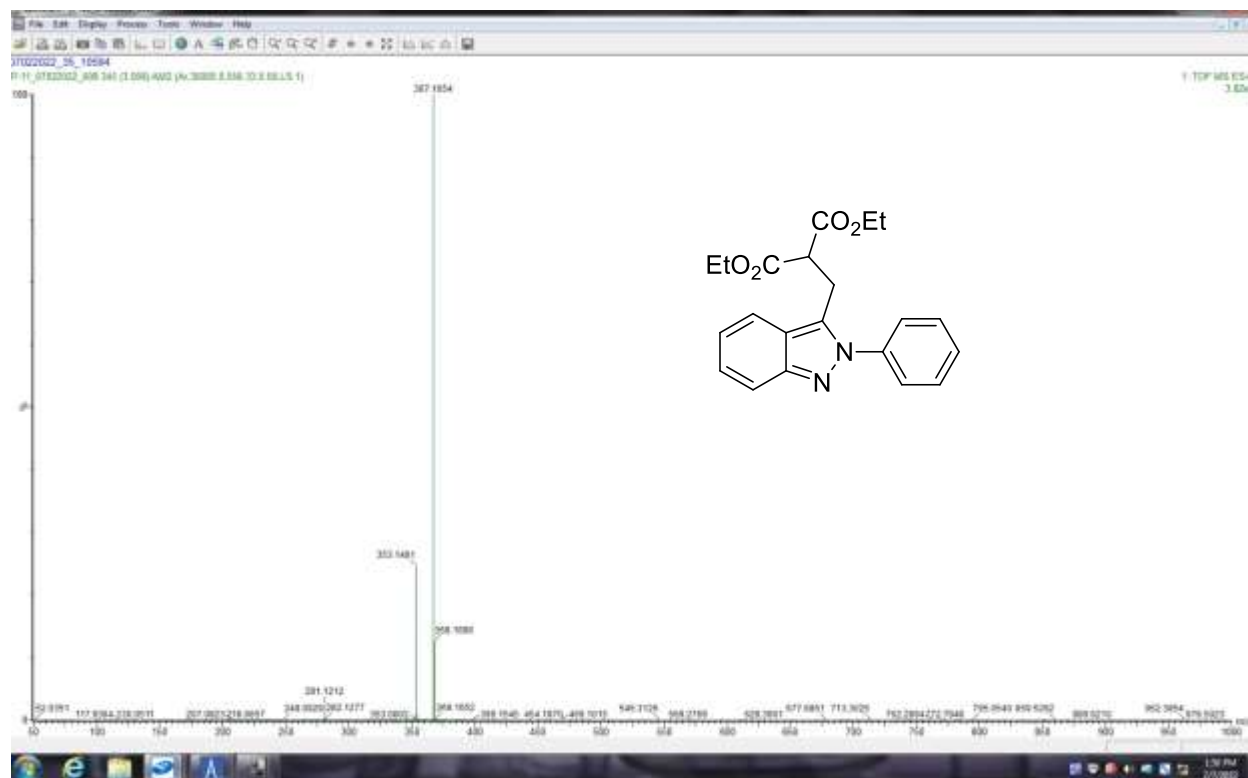

# HRMS Spectrum of 4

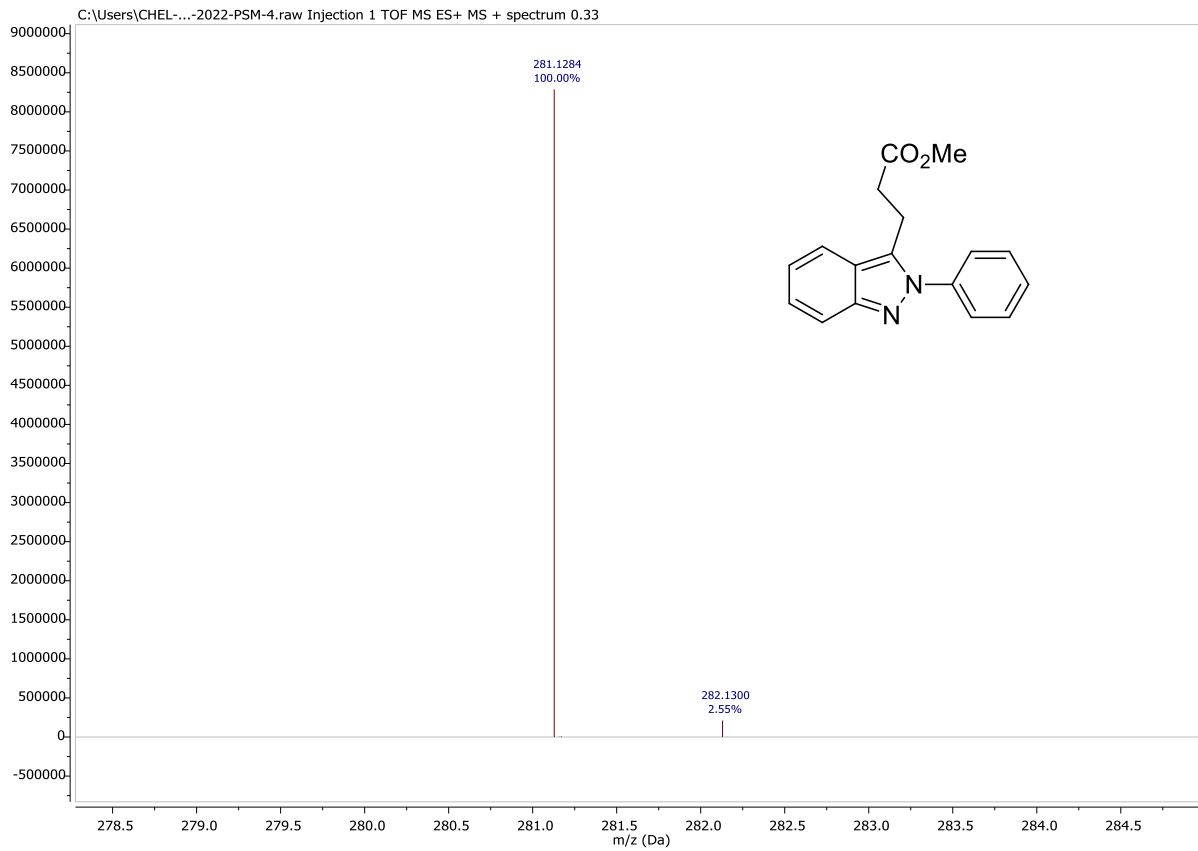

# HRMS Spectrum of **5**

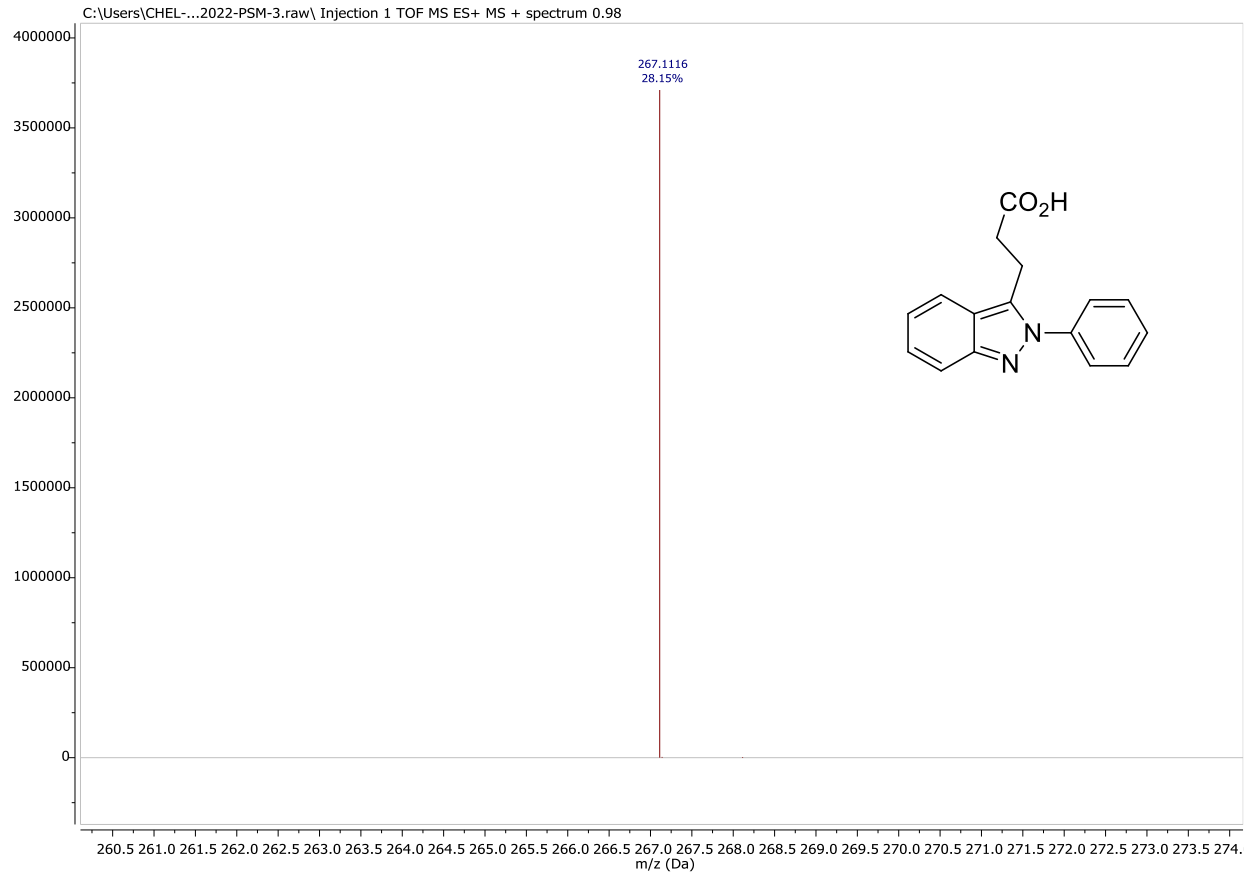

# HRMS Spectrum of **6**

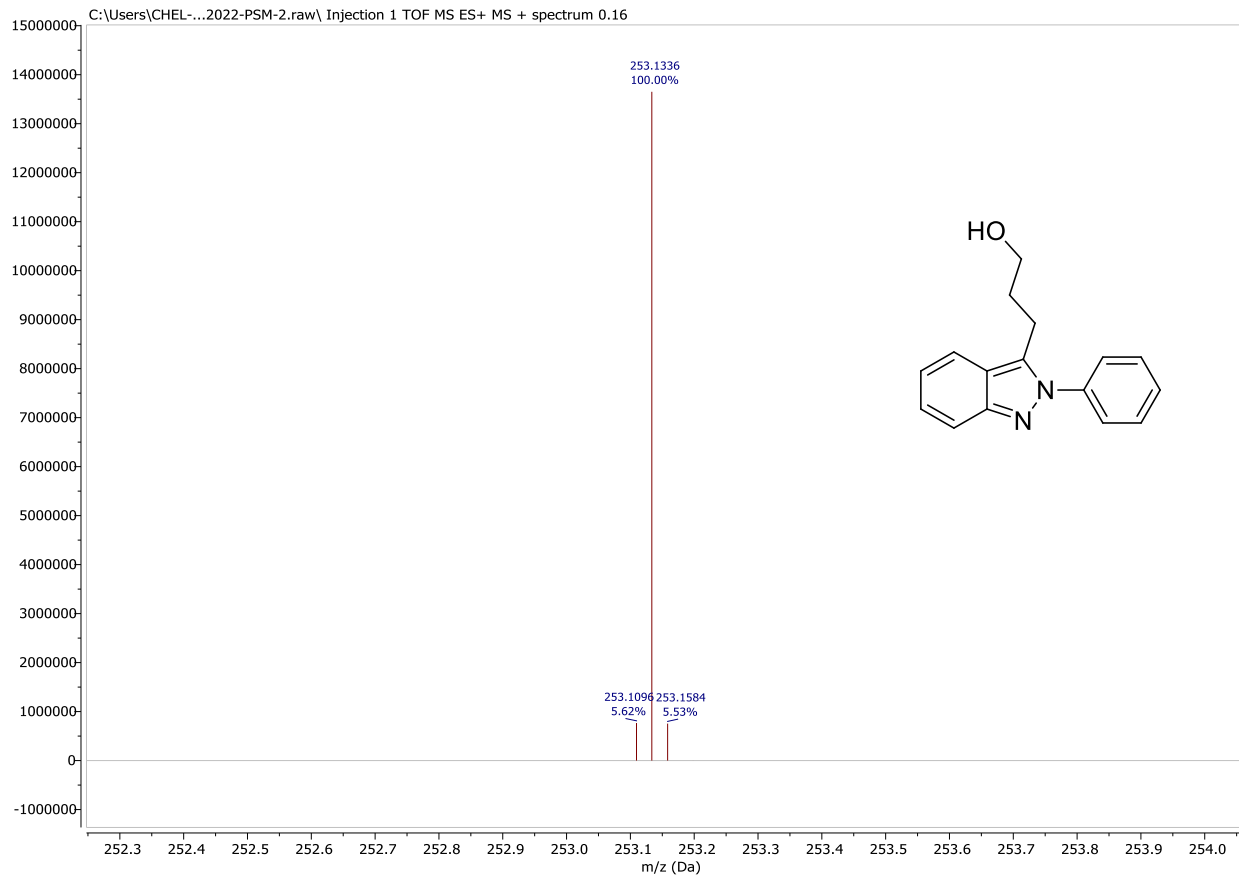

# HRMS Spectrum of 7

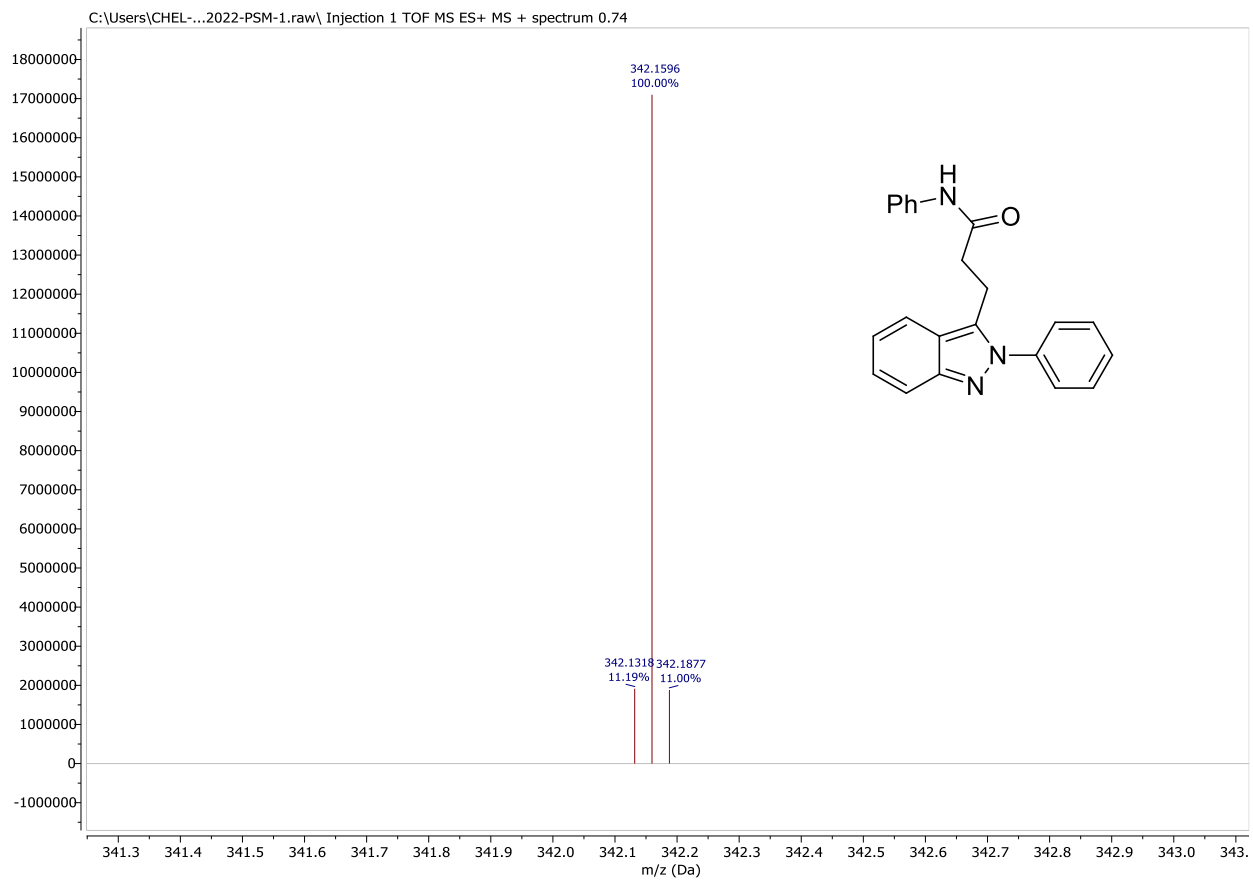

Supplement: d2nj01801b1.pdf [file d2nj01801b1.pdf]
