# Supplementary material for: Synthesis of 3C-alkylated active methylene substituted 2H-indazole derivatives via sequential ring opening of donor–acceptor cyclopropanes and reductive cyclization reaction
Source: Royal Society of Chemistry journal article supplement (doi:10.1039/d2nj01801b), 2022-01-01
Supplement: d2nj01801b2.pdf [file d2nj01801b2.pdf]

## Supporting Information

### Synthesis of 3C-alkylated active methylene substituted 2H-indazole derivatives *via* sequential ring opening of donor acceptor cyclopropanes and reductive cyclization reaction

*Archana Kumari Sahu, Subhamoy Biswas, Surjya Kumar Bora and Anil K. Saikia\**

#### Table of content

|                                                                                                                            |                |
|----------------------------------------------------------------------------------------------------------------------------|----------------|
| 1. Experimental section                                                                                                    | <b>S2-S18</b>  |
| 2. <sup>1</sup> H and <sup>13</sup> C spectra of all new compounds <sup>19</sup> F NMR spectra of compounds <b>3a0-3aq</b> | <b>S19-95</b>  |
| 3. The crystal parameters and ORTEP diagram of compound <b>3ag</b>                                                         | <b>S96-S97</b> |
| 4. References                                                                                                              | <b>S98</b>     |

## EXPERIMENTAL SECTION

### General information:

All the reagents were of reagent grade (AR grade) and were used as purchased without further purification. Silica gel (60-120 mesh size) was used for column chromatography. Reactions were monitored by TLC on silica gel GF254 (0.25 mm). Melting points were recorded in an open capillary tube and are uncorrected. Fourier transform-infra red (FT-IR) spectra were recorded as neat liquid or KBr pellets. NMR spectra were recorded in CDCl<sub>3</sub> with tetramethylsilane as the internal standard for <sup>1</sup>H (600 MHz, 400 MHz) or <sup>13</sup>C (150 MHz, 100 MHz) NMR. Chemical shifts (δ) are reported in ppm and spin-spin coupling constants (*J*) are given in Hz. HRMS spectra were recorded using Q-TOF mass spectrometer.

### General procedure for the synthesis of 1:

The corresponding starting materials were synthesized in a two-step procedure *i.e* Knoevenagel condensation followed by Corey-Chaykovsky cyclopropanation.

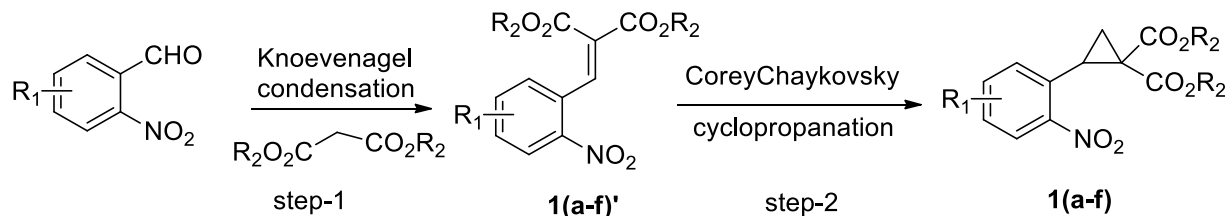

Scheme 14 starting material preparation

The starting material *o*-nitro DACs **1a'**, **1f'**, **2a**,<sup>3</sup> was prepared as per the literature procedure and the spectroscopic data are in good agreement with the literature one.

### General procedure for the synthesis of 1b'-1e':

To a solution of substituted *o*-nitrobenzaldehydes (2.2 mmol, 1.1 equiv.) in benzene (5 mL) at room temperature was added active methylene compound (2.0 mmol, 1.0 equiv.), piperidine (0.4

mmol, 0.2 equiv.) and AcOH (0.4 mmol, 0.2 equiv.) under nitrogen atmosphere. Then, the reaction was refluxed on an oil bath for 12 h. After completion of the reaction, the solvent was removed under reduced pressure and the crude was subjected to column chromatography over silica gel to give the corresponding product.

**Dimethyl 2-(4-bromo-2-nitrobenzylidene)malonate (1b')**:

Orange gum;  $R_f$  (hexane/EtOAc, 9:1) 0.50; Yield 396 mg, 62%;  $^1\text{H NMR}$  (400 MHz,  $\text{CDCl}_3$ )  $\delta$  8.35 (s, 1 H), 8.10 (s, 1 H), 7.77 (d,  $J = 8.0$  Hz, 1 H), 7.30 (d,  $J = 8.0$  Hz, 1 H), 3.88 (s, 3 H), 3.65 (s, 3 H).  $^{13}\text{C}\{^1\text{H}\}$  NMR (100 MHz,  $\text{CDCl}_3$ )  $\delta$  165.3, 136.8, 147.7, 140.7, 137.0, 131.5, 129.3, 129.2, 128.4, 124.1, 53.2, 52.8. IR (KBr, neat) 2954, 1727, 1643, 1522, 1432, 1350, 1225, 1156, 1073, 981, 843, 739  $\text{cm}^{-1}$ ; HRMS (ESI) calcd. for  $\text{C}_{12}\text{H}_{11}\text{BrNO}_6$  ( $\text{M} + \text{H}$ ) $^+$  343.9764, found 343.9759.

**Dimethyl 2-(5-chloro-2-nitrobenzylidene)malonate (1c')**:

Yellow gum;  $R_f$  (hexane/EtOAc, 9:1) 0.50; Yield 364 mg, 61%;  $^1\text{H NMR}$  (400 MHz,  $\text{CDCl}_3$ )  $\delta$  8.17 (d,  $J = 8.4$  Hz, 1 H), 8.13 (s, 1 H), 7.53 (dd,  $J = 8.4$  and 2.0 Hz, 1 H), 7.39 (d,  $J = 2.0$  Hz, 1 H), 3.88 (s, 3 H), 3.66 (s, 3 H).  $^{13}\text{C}\{^1\text{H}\}$  NMR (100 MHz,  $\text{CDCl}_3$ )  $\delta$  165.0, 163.6, 145.6, 140.6, 140.5, 132.2, 130.4, 130.0, 129.4, 126.7, 53.2, 52.8. IR (KBr, neat) 2957, 1724, 1605, 1565, 1435, 1343, 1220, 1181, 1071, 986, 844, 756  $\text{cm}^{-1}$ ; HRMS (ESI) calcd. for  $\text{C}_{12}\text{H}_{11}\text{ClNO}_6$  ( $\text{M} + \text{H}$ ) $^+$  300.0269, found 300.0251.

**Dimethyl 2-(4,5-dimethoxy-2-nitrobenzylidene)malonate (1d')**:

Orange gum;  $R_f$  (hexane/EtOAc, 4:1) 0.50; Yield 389 mg, 60%;  $^1\text{H NMR}$  (500 MHz,  $\text{CDCl}_3$ )  $\delta$  8.23 (s, 1 H), 7.77 (s, 1 H), 6.88 (s, 1 H), 3.99 (s, 3 H), 3.94 (s, 3 H), 3.88 (s, 3 H), 3.67 (s, 3 H).  $^{13}\text{C}\{^1\text{H}\}$  NMR (125 MHz,  $\text{CDCl}_3$ )  $\delta$  166.2, 164.1, 153.5, 149.8, 142.0, 140.3, 127.9, 124.6, 111.6, 108.2, 56.8, 56.7, 53.0, 52.8. IR (KBr, neat) 2965, 1732, 1610, 1504, 1427, 1330, 1279, 1171,

1086, 946, 845, 742  $\text{cm}^{-1}$ ; HRMS (ESI) calcd. for  $\text{C}_{14}\text{H}_{15}\text{NO}_8\text{K}$  ( $\text{M} + \text{K}$ )<sup>+</sup> 364.0429, found 364.0431.

**Dimethyl 2-(5-methoxy-2-nitrobenzylidene)malonate (1e')**:

Yellow gum;  $R_f$  (hexane/EtOAc, 4:1) 0.50; Yield 443 mg, 75%;  $^1\text{H}$  NMR (500 MHz,  $\text{CDCl}_3$ )  $\delta$  8.24 (d,  $J = 8.5$  Hz, 2 H), 6.99 (dd,  $J = 8.5$  and 2.5 Hz, 1H), 6.86 (d,  $J = 2.5$  Hz, 1 H), 3.89 (s, 6 H), 3.64 (s, 3 H).  $^{13}\text{C}\{^1\text{H}\}$  NMR (125 MHz,  $\text{CDCl}_3$ )  $\delta$  165.6, 164.0, 163.8, 142.5, 140.4, 133.2, 128.3, 128.0, 115.3, 114.9, 56.4, 53.1, 52.7 IR (KBr, neat) 2854, 1734, 1642, 1555, 1432, 1350, 1215, 1161, 1076, 956, 842, 742  $\text{cm}^{-1}$ ; HRMS (ESI) calcd. for  $\text{C}_{13}\text{H}_{14}\text{NO}_7$  ( $\text{M} + \text{H}$ )<sup>+</sup> 296.0765, found 296.0764.

**General procedure for the synthesis of 1b-1f:**

Sodium hydride (1.2 mmol, 1.2 equiv.) was added slowly to a stirred solution of trimethyl sulfoxoniumiodide (TMSOI) (1.2 mmol, 1.2 equiv.) in dry DMF (4.0 mL/ mmol) under nitrogen atmosphere at room temperature. Thereafter, the mixture is continued to stir for another 1 h. After getting a clear solution, the condensation product **1'** (1.0 mmol, 1.0 equiv.) dissolved in dry DMF (1 mL/ mmol) was added at once to the mixture. The reaction was monitored by TLC. After completion of starting material, the reaction mixture was quenched with saturated ammonium chloride and diluted with ice cold water. The organic layer was extracted with ethyl acetate and washed with brine. The combined organic layer was dried over  $\text{Na}_2\text{SO}_4$ . The solvent was evaporated under reduced pressure. Finally, the crude mixture was purified by column chromatography over a silica gel to obtain the corresponding compound **1**.

**Dimethyl 2-(4-bromo-2-nitrophenyl)cyclopropane-1,1-dicarboxylate (1b):**

Orange gum;  $R_f$  (hexane/EtOAc, 9:1) 0.50; Yield 213 mg, 60%;  $^1\text{H}$  NMR (500 MHz,  $\text{CDCl}_3$ )  $\delta$  8.17 (s, 1 H), 7.68 (d,  $J = 8.5$  Hz, 1 H), 7.24 (d,  $J = 8.5$  Hz, 1 H), 3.82 (d,  $J = 1.5$  Hz, 3 H), 3.63 (t,

$J = 9.0$  Hz, 1 H), 3.43 (d,  $J = 1.5$  Hz, 3 H), 2.07 (dd,  $J = 8.5$  and  $5.5$  Hz, 1 H), 1.90 – 1.87 (m, 1 H).  $^{13}\text{C}\{^1\text{H}\}$  NMR (125 MHz,  $\text{CDCl}_3$ )  $\delta$  169.5, 167.2, 150.8, 136.4, 132.8, 130.1, 128.1, 122.2, 53.3, 52.9, 35.9, 30.4, 19.6. IR (KBr, neat) 2954, 1729, 1527, 1440, 1343, 1285, 1133, 983, 891,  $756\text{ cm}^{-1}$ ; HRMS (ESI) calcd. for  $\text{C}_{13}\text{H}_{13}\text{BrNO}_6$  ( $\text{M} + \text{H}$ ) $^+$  357.9921, found 357.9920.

**Dimethyl 2-(5-chloro-2-nitrophenyl)cyclopropane-1,1-dicarboxylate (1c):**

Orange gum;  $R_f$  (hexane/EtOAc, 9:1) 0.50; Yield 197 mg, 63%;  $^1\text{H}$  NMR (400 MHz,  $\text{CDCl}_3$ )  $\delta$  8.01 (d,  $J = 8.8$  Hz, 1 H), 7.41 (dd,  $J = 8.8$  and  $2.0$  Hz, 1 H), 7.34 (d,  $J = 2.0$  Hz, 1 H), 3.83 (s, 3 H), 3.69 (t,  $J = 8.8$  Hz, 1 H), 3.44 (s, 3 H), 2.07 (dd,  $J = 8.4$  and  $5.6$  Hz, 1 H), 1.90 (dd,  $J = 8.4$  and  $5.6$  Hz, 1 H).  $^{13}\text{C}\{^1\text{H}\}$  NMR (100 MHz,  $\text{CDCl}_3$ )  $\delta$  169.5, 167.2, 148.7, 139.9, 133.2, 131.6, 129.1, 126.6, 53.4, 52.9, 35.9, 30.7, 19.8. IR (KBr, neat) 2954, 1724, 1602, 1522, 1437, 1340, 1275, 1128, 1063, 931, 881,  $754\text{ cm}^{-1}$ ; HRMS (ESI) calcd. for  $\text{C}_{13}\text{H}_{12}\text{ClNaO}_6$  ( $\text{M} + \text{Na}$ ) $^+$  336.0245, found 336.0260.

**Dimethyl 2-(4,5-dimethoxy-2-nitrophenyl)cyclopropane-1,1-dicarboxylate (1d):**

Yellow gum;  $R_f$  (hexane/EtOAc, 4:1) 0.50; Yield 221 mg, 65%;  $^1\text{H}$  NMR (400 MHz,  $\text{CDCl}_3$ )  $\delta$  7.67 (s, 1 H), 6.74 (s, 1 H), 3.97 (s, 3 H), 3.95 (s, 3 H), 3.83 (s, 3 H), 3.78 – 3.72 (m, 1 H), 3.43 (s, 3 H), 2.11 (dd,  $J = 8.4$  and  $5.2$  Hz, 1 H), 1.90 (dd,  $J = 8.4$  and  $5.2$  Hz, 1 H).  $^{13}\text{C}\{^1\text{H}\}$  NMR (100 MHz,  $\text{CDCl}_3$ )  $\delta$  169.9, 167.5, 153.0, 148.5, 142.9, 125.5, 112.7, 108.4, 56.6, 56.5, 53.2, 52.8, 36.0, 31.7, 20.2. IR (KBr, neat) 2932, 1727, 1517, 1435, 1333, 1218, 1063, 871,  $794\text{ cm}^{-1}$ ; HRMS (ESI) calcd. for  $\text{C}_{15}\text{H}_{18}\text{NO}_8$  ( $\text{M} + \text{H}$ ) $^+$  340.1027, found 340.1028.

**Dimethyl 2-(5-methoxy-2-nitrophenyl)cyclopropane-1,1-dicarboxylate (1e):**

Colourless gum;  $R_f$  (hexane/EtOAc, 4:1) 0.50; Yield 200 mg, 65%;  $^1\text{H}$  NMR (400 MHz,  $\text{CDCl}_3$ )  $\delta$  8.12 (d,  $J = 8.8$  Hz, 1 H), 6.88 (dd,  $J = 8.8$  and  $2.8$  Hz, 1 H), 6.80 (d,  $J = 2.8$  Hz, 1 H), 3.89 (s, 3 H), 3.83 (s, 3 H), 3.77 (t,  $J = 8.8$  Hz, 1 H), 3.41 (s, 3 H), 2.10 (dd,  $J = 8.8$  and  $5.6$  Hz, 1 H), 1.88

(dd,  $J = 8.8$  and  $5.6$  Hz, 1 H).  $^{13}\text{C}\{^1\text{H}\}$  NMR (100 MHz,  $\text{CDCl}_3$ )  $\delta$  169.9, 167.4, 163.4, 143.3, 133.9, 127.8, 116.9, 113.0, 56.1, 53.2, 52.8, 35.9, 31.7, 19.9. IR (KBr, neat) 2987, 1714, 1605, 1517, 1437, 1345, 1280, 1136, 1038, 749  $\text{cm}^{-1}$ ; HRMS (ESI) calcd. for  $\text{C}_{14}\text{H}_{19}\text{N}_2\text{O}_7$  ( $\text{M} + \text{NH}_4$ ) $^+$  327.1187, found 327.1186.

**Diethyl 2-(2-nitrophenyl)cyclopropane-1,1-dicarboxylate (1f):**

Colourless gum;  $R_f$  (hexane/EtOAc, 4:1) 0.45; Yield 218 mg, 71%;  $^1\text{H}$  NMR (400 MHz,  $\text{CDCl}_3$ )  $\delta$  8.05 (d,  $J = 8.0$  Hz, 1 H), 7.55 (t,  $J = 7.6$  Hz, 1 H), 7.43 (t,  $J = 7.6$  Hz, 1 H), 7.35 (d,  $J = 8.0$  Hz, 1 H), 4.29 – 4.22 (m, 2 H), 3.89-3.82 (m, 1 H), 3.81 – 3.71 (m, 2 H), 2.11 (dd,  $J = 8.8$  and  $5.2$  Hz, 1 H), 1.84 (dd,  $J = 8.8$  and  $5.2$  Hz, 1 H), 1.30 (t,  $J = 7.2$  Hz, 3 H), 0.91 (t,  $J = 7.2$  Hz, 3 H).  $^{13}\text{C}\{^1\text{H}\}$  NMR (100 MHz,  $\text{CDCl}_3$ )  $\delta$  169.4, 166.9, 150.5, 133.4, 131.2, 131.1, 128.8, 125.1, 62.1, 61.8, 36.4, 30.6, 19.2, 14.3, 13.8. IR (KBr, neat) 2984, 1727, 1612, 1530, 1370, 1275, 1136, 1031, 850, 786  $\text{cm}^{-1}$ ; HRMS (ESI) calcd. for  $\text{C}_{15}\text{H}_{18}\text{NO}_6$  ( $\text{M} + \text{H}$ ) $^+$  308.1129, found 308.1128.

**Experimental procedure for the synthesis of 3aa':**

To a solution of  $\text{Ni}(\text{ClO}_4)_2 \cdot 6\text{H}_2\text{O}$  (9 mg, 0.025 mmol) in DCM (5 mL) at room temperature was added dimethyl 2-(2-nitrophenyl)cyclopropane-1,1-dicarboxylate (**1a**) (140 mg, 0.5 mmol) and aniline (56 mg, 0.6 mmol). Then, the reaction was refluxed for 12 h. After completion of the reaction, the solvent was removed under reduced pressure. The crude was subjected to column chromatography over silica gel to give the corresponding product **3aa'** in 93% yield (172 mg).

**Dimethyl 2-(2-(2-nitrophenyl)-2-(phenylamino)ethyl)malonate (3aa'):**

Colourless gum;  $R_f$  (hexane/EtOAc, 4:1) 0.40; Yield 172 mg, 93%;  $^1\text{H}$  NMR (600 MHz,  $\text{CDCl}_3$ )  $\delta$  7.98 (d,  $J = 8.4$  Hz, 1 H), 7.66 (d,  $J = 7.8$  Hz, 1 H), 7.57 (t,  $J = 7.8$  Hz, 1 H), 7.41 (t,  $J = 7.8$  Hz, 1 H), 7.09 (t,  $J = 8.4$  Hz, 2 H), 6.68 (t,  $J = 7.8$  Hz, 1 H), 6.45 (d,  $J = 7.8$  Hz, 2 H), 5.20 (t,  $J = 6.6$  Hz, 1 H), 4.43 (d,  $J = 6.6$  Hz, 1 H), 3.79 (s, 3 H), 3.74 (s, 3 H), 2.52 - 2.47 (m, 1 H), 2.45 - 2.37

(m, 1H).  $^{13}\text{C}\{^1\text{H}\}$  NMR (150 MHz,  $\text{CDCl}_3$ )  $\delta$  170.5, 169.5, 148.9, 146.1, 139.0, 134.1, 129.6, 128.6, 128.1, 125.3, 118.5, 113.3, 53.2, 53.1, 52.7, 50.3, 36.7, IR (KBr, neat) 2953, 1750, 1729, 1605, 1520, 1350, 1277, 1155, 852, 753  $\text{cm}^{-1}$ ; HRMS (ESI) calcd. for  $\text{C}_{19}\text{H}_{21}\text{N}_2\text{O}_6(\text{M} + \text{H})^+$  373.1394, found 373.1395.

### **General procedure for the synthesis of 3:**

To a solution of  $\text{Ni}(\text{ClO}_4)_2 \cdot 6\text{H}_2\text{O}$  (0.015 mmol, 0.05 equiv.) in DCM (3 mL) at room temperature was added *o*-nitro having DACs **1** (0.3 mmol, 1.0 equiv.) and primary arylamines **2** (0.36 mmol, 1.2 equiv.). Then, the reaction was refluxed for 12 h. After completion of the reaction as indicated by TLC analysis, the solvent was removed under reduced pressure and the crude was used for further reaction without any purification. In continuation, to a solution of  $\text{SnCl}_2 \cdot 2\text{H}_2\text{O}$  (0.6 mmol, 2.0 equiv.) in dry MeOH (3 mL) at room temperature was added the crude product isolated earlier under nitrogen atmosphere and refluxed till the starting material consumes completely. The reaction mixture was then quenched with saturated  $\text{NH}_4\text{Cl}$  solution, organic layer was extracted with ethyl acetate and washed with brine. The combined organic layer was dried over  $\text{Na}_2\text{SO}_4$ . The solvent was evaporated under reduced pressure. Finally the crude mixture was purified by column chromatography over a silica gel to obtain the corresponding compound **3**.

### **Dimethyl 2-((2-phenyl-2*H*-indazol-3-yl)methyl)malonate (3aa):**

Orange gum;  $R_f$  (hexane/EtOAc, 4:1) 0.50; Yield 70 mg, 70%;  $^1\text{H}$  NMR (500 MHz,  $\text{CDCl}_3$ )  $\delta$  7.71 (d,  $J = 8.5$  Hz, 1 H), 7.65 (d,  $J = 8.5$  Hz, 1 H), 7.53 (m, 5 H), 7.30 (t,  $J = 8.5$  Hz, 1 H), 7.09 (t,  $J = 8.5$  Hz, 1 H), 3.70 (d,  $J = 7.8$  Hz, 2 H), 3.59 (d,  $J = 7.8$  Hz, 1 H), 3.55 (s, 6 H).;  $^{13}\text{C}\{^1\text{H}\}$  NMR (125 MHz,  $\text{CDCl}_3$ )  $\delta$  168.5, 148.8, 139.9, 131.8, 129.6, 129.5, 126.9, 126.5, 122.0, 121.6, 120.0, 118.0, 52.9, 50.9, 24.7; IR (KBr, neat) 2954, 1734, 1595, 1435, 1375, 1265, 1118, 1021, 731, 696  $\text{cm}^{-1}$ ; HRMS (ESI) calcd. for  $\text{C}_{19}\text{H}_{19}\text{N}_2\text{O}_4 (\text{M} + \text{H})^+$  339.1339, found 339.1352.

**Dimethyl 2-((2-(*p*-tolyl)-2*H*-indazol-3-yl)methyl)malonate (3ab):**

Orange gum;  $R_f$  (hexane/EtOAc, 4:1) 0.50; Yield 62 mg, 59%;  $^1\text{H}$  NMR (400 MHz,  $\text{CDCl}_3$ )  $\delta$  7.71 (d,  $J = 8.5$  Hz, 1 H), 7.65 (d,  $J = 8.5$  Hz, 1 H), 7.42 (d,  $J = 8.4$  Hz, 2 H), 7.35 (d,  $J = 8.4$  Hz, 2 H), 7.31 (t,  $J = 6.8$  Hz, 1 H), 7.10 (t,  $J = 6.8$  Hz, 1 H), 3.69 (d,  $J = 7.6$  Hz, 2 H), 3.61 (d,  $J = 7.6$  Hz, 1 H), 3.57 (s, 6 H), 2.46 (s, 3 H).;  $^{13}\text{C}\{^1\text{H}\}$  NMR (100 MHz,  $\text{CDCl}_3$ )  $\delta$  168.6, 148.7, 139.6, 137.3, 131.7, 130.1, 126.8, 126.2, 121.8, 121.5, 119.9, 117.9, 52.9, 50.9, 24.7, 21.4; IR (KBr, neat) 2957, 1734, 1520, 1435, 1378, 1245, 1161, 1043, 821, 749  $\text{cm}^{-1}$ ; HRMS (ESI) calcd. for  $\text{C}_{20}\text{H}_{21}\text{N}_2\text{O}_4$  (M + H) $^+$  353.1496, found 353.1497.

**Dimethyl 2-((2-(4-ethylphenyl)-2*H*-indazol-3-yl)methyl)malonate (3ac):**

Brown solid;  $R_f$  (hexane/EtOAc, 4:1) 0.50; mp 98-100 °C Yield 66 mg, 60%;  $^1\text{H}$  NMR (500 MHz,  $\text{CDCl}_3$ )  $\delta$  7.69 (d,  $J = 8.5$  Hz, 1 H), 7.64 (d,  $J = 8.5$  Hz, 1 H), 7.43 (d,  $J = 8.5$  Hz, 2 H), 7.36 (d,  $J = 8.5$  Hz, 2 H), 7.29 (t,  $J = 7.5$  Hz, 1 H), 7.09 (t,  $J = 7.5$  Hz, 1 H), 3.69 (d,  $J = 8.0$  Hz, 2 H), 3.61 (t,  $J = 8.0$  Hz, 1 H), 3.56 (s, 6 H), 2.76 (q,  $J = 7.5$  Hz, 2 H), 1.30 (t,  $J = 7.5$  Hz, 3 H).  $^{13}\text{C}\{^1\text{H}\}$  NMR (100 MHz,  $\text{CDCl}_3$ )  $\delta$  168.7, 148.8, 145.9, 137.5, 131.7, 129.0, 126.8, 126.3, 121.9, 121.6, 120.0, 118.0, 52.9, 51.0, 28.8, 24.7, 15.6.; IR (KBr, neat) 2957, 1732, 1625, 1520, 1435, 1380, 1225, 1153, 1016, 844, 741  $\text{cm}^{-1}$ ; HRMS (ESI) calcd. for  $\text{C}_{21}\text{H}_{23}\text{N}_2\text{O}_4$  (M + H) $^+$  367.1652, found 367.1650.

**Dimethyl 2-((2-(4-butylphenyl)-2*H*-indazol-3-yl)methyl)malonate (3ad):**

Yellow gum;  $R_f$  (hexane/EtOAc, 4:1) 0.50; Yield 60 mg, 50%;  $^1\text{H}$  NMR (400 MHz,  $\text{CDCl}_3$ )  $\delta$  7.72 (d,  $J = 8.8$  Hz, 1 H), 7.66 (d,  $J = 8.4$  Hz, 1 H), 7.44 (d,  $J = 8.0$  Hz, 2 H), 7.37 (d,  $J = 8.4$  Hz, 2 H), 7.31 (t,  $J = 6.8$  Hz, 1 H), 7.1 (t,  $J = 6.8$  Hz, 1 H), 3.71 (d,  $J = 7.6$  Hz, 2 H), 3.62 (dd,  $J = 8.4$  and 6.8 Hz, 1 H), 3.58 (s, 6 H), 2.73 (t,  $J = 7.6$  Hz, 2 H), 1.71 – 1.64 (m, 2 H), 1.41 (q,  $J = 14.8$  and 7.2 Hz, 2 H), 0.97 (t,  $J = 7.2$  Hz, 3 H).  $^{13}\text{C}\{^1\text{H}\}$  NMR (100 MHz,  $\text{CDCl}_3$ )  $\delta$  168.6, 148.7, 144.6,



137.5, 131.7, 129.5, 126.8, 126.2, 121.9, 121.5, 120.0, 117.9, 52.9, 50.9, 35.5, 33.6, 24.7, 22.4, 14.1.; IR (KBr, neat) 2932, 1737, 1627, 1517, 1435, 1268, 1153, 1046, 916, 734  $\text{cm}^{-1}$ ; HRMS (ESI) calcd. for  $\text{C}_{23}\text{H}_{27}\text{N}_2\text{O}_4(\text{M} + \text{H})^+$  395.1965, found 395.1979.

**Dimethyl 2-((2-(4-(*tert*-butyl)phenyl)-2*H*-indazol-3-yl)methyl)malonate (3ae):**

Orange gum;  $R_f$  (hexane/EtOAc, 4:1) 0.50; Yield 74 mg, 63%;  $^1\text{H}$  NMR (400 MHz,  $\text{CDCl}_3$ )  $\delta$  7.71 (d,  $J = 8.4$  Hz, 1 H), 7.66 (d,  $J = 8.4$  Hz, 1 H), 7.57 (d,  $J = 8.4$  Hz, 2 H), 7.46 (d,  $J = 8.4$  Hz, 2 H), 7.32 (t,  $J = 6.8$  Hz, 1 H), 7.11 (t,  $J = 6.8$  Hz, 1 H), 3.72 (d,  $J = 7.2$  Hz, 2 H), 3.68-3.64 (m, 1 H), 3.58 (s, 6 H), 1.40 (s, 9 H).  $^{13}\text{C}\{^1\text{H}\}$  NMR (100 MHz,  $\text{CDCl}_3$ )  $\delta$  168.7, 152.8, 148.8, 137.3, 131.7, 126.8, 126.6, 126.0, 122.0, 121.5, 120.0, 117.9, 53.0, 50.9, 35.1, 31.5, 24.7.; IR (KBr, neat) 2952, 1734, 1623, 1520, 1435, 1378, 1220, 1153, 1106, 841, 746  $\text{cm}^{-1}$ ; HRMS (ESI) calcd. for  $\text{C}_{23}\text{H}_{27}\text{N}_2\text{O}_4(\text{M} + \text{H})^+$  395.1965, found 395.1968.

**Dimethyl 2-((2-(4-methoxyphenyl)-2*H*-indazol-3-yl)methyl)malonate (3af):**

Orange Solid;  $R_f$  (hexane/EtOAc, 4:1) 0.40; mp 97-99 °C Yield 66 mg, 60%;  $^1\text{H}$  NMR (400 MHz,  $\text{CDCl}_3$ )  $\delta$  7.71 (d,  $J = 8.4$  Hz, 1 H), 7.65 (d,  $J = 8.4$  Hz, 1 H), 7.46 (d,  $J = 8.8$  Hz, 2 H), 7.30 (dd,  $J = 15.6$  and  $6.8$  Hz, 1 H), 7.12 (t,  $J = 7.2$  Hz, 1 H), 7.06 (d,  $J = 8.8$  Hz, 2 H), 3.91 (s, 3 H), 3.68 (d,  $J = 6.8$  Hz, 2 H), 3.62 (t,  $J = 6.8$  Hz, 1 H), 3.59 (s, 6 H).;  $^{13}\text{C}\{^1\text{H}\}$  NMR (100 MHz,  $\text{CDCl}_3$ )  $\delta$  168.6, 160.4, 148.7, 132.8, 131.8, 127.7, 126.8, 121.9, 121.5, 120.0, 117.9, 114.8, 55.8, 53.0, 50.1, 24.7.; IR (KBr, neat) 2957, 1732, 1620, 1510, 1437, 1383, 1245, 1023, 836, 749  $\text{cm}^{-1}$ ; HRMS (ESI) calcd. for  $\text{C}_{20}\text{H}_{21}\text{N}_2\text{O}_5(\text{M} + \text{H})^+$  369.1445, found 369.1441.

**Dimethyl 2-((2-(4-(methylthio)phenyl)-2*H*-indazol-3-yl)methyl)malonate (3ag):**

Brown solid;  $R_f$  (hexane/EtOAc, 4:1) 0.40; mp 85-87 °C Yield 82 mg, 70%;  $^1\text{H}$  NMR (400 MHz,  $\text{CDCl}_3$ )  $\delta$  7.71 (d,  $J = 8.8$  Hz, 1 H), 7.65 (d,  $J = 8.4$  Hz, 1 H), 7.47 (d,  $J = 8.8$  Hz, 2 H), 7.41 (d,  $J = 8.4$  Hz, 2 H), 7.32 (t,  $J = 7.2$  Hz, 1 H), 7.11 (t,  $J = 7.2$  Hz, 1 H), 3.70 (d,  $J = 6.8$  Hz, 2 H), 3.64

(dd,  $J = 6.8$  and  $2.4$  Hz, 1 H), 3.59 (s, 6 H), 2.57 (s, 3 H).  $^{13}\text{C}\{^1\text{H}\}$  NMR (100 MHz,  $\text{CDCl}_3$ )  $\delta$  168.6, 148.9, 140.9, 136.7, 131.8, 127.0, 126.9, 126.7, 122.0, 121.6, 120.0, 118.0, 53.0, 50.9, 24.7, 15.8.; IR (KBr, neat) 2952, 1734, 1520, 1435, 1378, 1223, 1151, 1093, 834, 744  $\text{cm}^{-1}$ ; HRMS (ESI) calcd. for  $\text{C}_{20}\text{H}_{21}\text{N}_2\text{O}_4\text{S}$  ( $\text{M} + \text{H}$ ) $^+$  385.1217, found 385.1219.

**Dimethyl 2-((2-(3,4-dimethylphenyl)-2H-indazol-3-yl)methyl)malonate (3ah):**

Orange gum;  $R_f$  (hexane/EtOAc, 4:1) 0.50; Yield 66 mg, 60%;  $^1\text{H}$  NMR (400 MHz,  $\text{CDCl}_3$ )  $\delta$  7.72 (d,  $J = 8.4$  Hz, 1 H), 7.65 (d,  $J = 8.4$  Hz, 1 H), 7.34 – 7.24 (m, 4 H), 7.14 – 7.08 (t,  $J = 7.2$  Hz, 1 H), 3.71 (d,  $J = 7.2$  Hz, 2 H), 3.63 (dd,  $J = 7.2$  and  $2.0$  Hz, 1 H), 3.59 (s, 6 H), 2.37 (d,  $J = 4.4$  Hz, 6 H).  $^{13}\text{C}\{^1\text{H}\}$  NMR (100 MHz,  $\text{CDCl}_3$ )  $\delta$  168.7, 148.7, 138.3, 137.6, 131.6, 130.5, 127.4, 126.8, 123.5, 121.8, 121.5, 120.0, 118.0, 52.9, 50.9, 24.7, 20.0, 19.8. IR (KBr, neat) 2952, 1732, 1627, 1505, 1435, 1380, 1210, 1153, 1062, 903, 824, 744  $\text{cm}^{-1}$ ; HRMS (ESI) calcd. for  $\text{C}_{21}\text{H}_{23}\text{N}_2\text{O}_4$  ( $\text{M} + \text{H}$ ) $^+$  367.1652, found 367.1653.

**Dimethyl 2-((2-(2,4-dimethoxyphenyl)-2H-indazol-3-yl)methyl)malonate (3ai):**

Orange gum;  $R_f$  (hexane/EtOAc, 7:3) 0.60; Yield 67 mg, 56%;  $^1\text{H}$  NMR (400 MHz,  $\text{CDCl}_3$ )  $\delta$  7.70 (d,  $J = 8.4$  Hz, 1 H), 7.66 (d,  $J = 8.4$  Hz, 1 H), 7.35 (d,  $J = 8.4$  Hz, 1 H), 7.32-7.29 (m, 1 H), 7.09 (t,  $J = 8.4$  Hz, 1 H), 6.66 – 6.62 (m, 2 H), 3.91 (s, 3 H), 3.77 (s, 3 H), 3.65 – 3.57 (m, 7 H), 3.54 (d,  $J = 1.0$  Hz, 2 H).  $^{13}\text{C}\{^1\text{H}\}$  NMR (100 MHz,  $\text{CDCl}_3$ )  $\delta$  168.9, 162.1, 155.6, 149.0, 133.7, 130.0, 126.6, 121.8, 121.5, 121.0, 120.2, 118.0, 105.0, 99.7, 56.1, 55.9, 52.9, 50.8, 24.7.; IR (KBr, neat) 2952, 1732, 1612, 1517, 1435, 1375, 1243, 1158, 1023, 918, 836, 744  $\text{cm}^{-1}$ ; HRMS (ESI) calcd. for  $\text{C}_{21}\text{H}_{23}\text{N}_2\text{O}_6$  ( $\text{M} + \text{H}$ ) $^+$  399.1551, found 399.1548.

**Dimethyl 2-((2-(3,4-dimethoxyphenyl)-2H-indazol-3-yl)methyl)malonate (3aj):**

Orange gum;  $R_f$  (hexane/EtOAc, 7:3) 0.60; Yield 67 mg, 66%;  $^1\text{H}$  NMR (400 MHz,  $\text{CDCl}_3$ )  $\delta$  7.72 (d,  $J = 8.4$  Hz, 1 H), 7.66 (d,  $J = 8.4$  Hz, 1 H), 7.33 (t,  $J = 7.6$  Hz, 1 H), 7.13 – 7.09 (m, 3 H), 7.02

– 6.99 (m, 1 H), 3.99 (s, 3 H), 3.95 (s, 3 H), 3.71-3.69 (m, 2 H), 3.66-3.62 (m, 1 H), 3.60 (s, 6 H).  $^{13}\text{C}\{^1\text{H}\}$  NMR (100 MHz,  $\text{CDCl}_3$ )  $\delta$  168.7, 150.1, 149.7, 148.7, 132.9, 131.9, 126.9, 122.0, 121.5, 120.0, 118.7, 117.9, 111.2, 110.3, 56.5, 56.4, 53.0, 50.9, 24.8; IR (KBr, neat) 2837, 1734, 1627, 1517, 1437, 1375, 1235, 1026, 898, 746  $\text{cm}^{-1}$ ; HRMS (ESI) calcd. for  $\text{C}_{21}\text{H}_{23}\text{N}_2\text{O}_6(\text{M} + \text{H})^+$  399.1551, found 399.1554.

**Dimethyl 2-((2-(3,5-dimethoxyphenyl)-2H-indazol-3-yl)methyl)malonate (3ak):**

Orange gum;  $R_f$  (hexane/EtOAc, 7:3) 0.60; Yield 62 mg, 52%;  $^1\text{H}$  NMR (400 MHz,  $\text{CDCl}_3$ )  $\delta$  7.71 (d,  $J = 8.4$  Hz, 1 H), 7.65 (d,  $J = 8.4$  Hz, 1 H), 7.32 (t,  $J = 7.2$  Hz, 1 H), 7.10 (t,  $J = 7.2$  Hz, 1 H), 6.70 (d,  $J = 2.4$  Hz, 2 H), 6.61 (t,  $J = 2.4$  Hz, 1 H), 3.86 (s, 6 H), 3.73 (d,  $J = 8.4$  Hz, 2 H), 3.68 (dd,  $J = 8.4$  and 6.8 Hz, 1 H), 3.60 (s, 6 H).  $^{13}\text{C}\{^1\text{H}\}$  NMR (100 MHz,  $\text{CDCl}_3$ )  $\delta$  168.6, 161.3, 148.7, 141.3, 131.7, 127.0, 122.0, 121.6, 120.0, 118.0, 104.9, 101.9, 55.9, 53.0, 50.9, 24.8.; IR (KBr, neat) 2954, 1732, 1612, 1432, 1343, 1205, 1153, 1063, 839, 749  $\text{cm}^{-1}$ ; HRMS (ESI) calcd. for  $\text{C}_{21}\text{H}_{23}\text{N}_2\text{O}_6(\text{M} + \text{H})^+$  399.1551, found 399.1548.

**Dimethyl 2-((2-(benzo[d][1,3]dioxol-5-yl)-2H-indazol-3-yl)methyl)malonate (3al):**

Brown solid;  $R_f$  (hexane/EtOAc, 7:3) 0.60; mp 93-95 °C Yield 57 mg, 50%;  $^1\text{H}$  NMR (500 MHz,  $\text{CDCl}_3$ )  $\delta$  7.67 (d,  $J = 8.5$  Hz, 1 H), 7.62 (d,  $J = 8.5$  Hz, 1 H), 7.29 (t,  $J = 8.5$  Hz, 1 H), 7.08 (t,  $J = 7.5$  Hz, 1 H), 6.98 (t,  $J = 7.5$  Hz, 2 H), 6.92 (d,  $J = 8.5$  Hz, 1 H), 6.09 (s, 2 H), 3.68 – 3.62 (m, 3 H), 3.58 (s, 6 H).  $^{13}\text{C}\{^1\text{H}\}$  NMR (125 MHz,  $\text{CDCl}_3$ )  $\delta$  168.6, 148.7, 148.5, 140.1, 133.7, 131.9, 127.0, 122.0, 121.4, 120.3, 120.0, 118.0, 108.5, 107.9, 102.3, 53.0, 50.9, 24.7.; IR (KBr, neat) 2902, 1729, 1625, 1500, 1435, 1343, 1213, 1038, 931, 744, 639  $\text{cm}^{-1}$ ; HRMS (ESI) calcd. for  $\text{C}_{20}\text{H}_{19}\text{N}_2\text{O}_6(\text{M} + \text{H})^+$  383.1238, found 383.1233.

**Dimethyl 2-((2-(4-chlorophenyl)-2H-indazol-3-yl)methyl)malonate (3am):**

Orange gum;  $R_f$  (hexane/EtOAc, 9:1) 0.50; Yield 67 mg, 60%;  $^1\text{H}$  NMR (400 MHz,  $\text{CDCl}_3$ )  $\delta$  7.71 (d,  $J = 8.4$  Hz, 1 H), 7.65 (d,  $J = 8.4$  Hz, 1 H), 7.55 (d,  $J = 8.8$  Hz, 2 H), 7.51 (d,  $J = 8.8$  Hz, 2 H), 7.33 (t,  $J = 7.2$  Hz, 1 H), 7.12 (t,  $J = 7.2$  Hz, 1 H), 3.70 (d,  $J = 6.8$  Hz, 2 H), 3.66-3.62 (m, 1 H), 3.60 (s, 6 H).  $^{13}\text{C}\{^1\text{H}\}$  NMR (100 MHz,  $\text{CDCl}_3$ )  $\delta$  168.5, 149.0, 138.4, 135.5, 131.9, 129.8, 127.8, 127.2, 122.2, 121.6, 119.9, 118.0, 53.0, 51.9, 24.7.; IR (KBr, neat) 2952, 1737, 1625, 1500, 1435, 1378, 1275, 1153, 1091, 839, 749  $\text{cm}^{-1}$ ; HRMS (ESI) calcd. for  $\text{C}_{19}\text{H}_{18}\text{ClN}_2\text{O}_4(\text{M} + \text{H})^+$  373.0950, found 373.0955.

**Dimethyl 2-((2-(4-bromophenyl)-2H-indazol-3-yl)methyl)malonate (3an):**

Orange gum;  $R_f$  (hexane/EtOAc, 9:1) 0.50; Yield 71 mg, 57%;  $^1\text{H}$  NMR (500 MHz,  $\text{CDCl}_3$ ) 7.68 (d,  $J = 8.0$  Hz, 3 H), 7.62 (d,  $J = 8.5$  Hz, 1 H), 7.43 (d,  $J = 8.5$  Hz, 2 H), 7.30 (t,  $J = 7.5$  Hz, 1 H), 7.09 (t,  $J = 7.5$  Hz, 1 H), 3.68 (d,  $J = 8.0$  Hz, 2 H), 3.62 (dd,  $J = 6.5$  and 8.0 Hz 1 H), 3.57 (s, 6 H).  $^{13}\text{C}\{^1\text{H}\}$  NMR (125 MHz,  $\text{CDCl}_3$ )  $\delta$  168.4, 149.0, 138.9, 132.8, 131.8, 128.0, 127.2, 123.6, 122.2, 121.6, 120.0, 118.0, 53.0, 50.9, 24.7.; IR (KBr, neat) 2952, 1740, 1625, 1495, 1380, 1223, 1181, 1071, 834, 744  $\text{cm}^{-1}$ ; HRMS (ESI) calcd. for  $\text{C}_{19}\text{H}_{18}\text{BrN}_2\text{O}_4(\text{M} + \text{H})^+$  417.0444, found 417.0442.

**Dimethyl 2-((2-(4-fluorophenyl)-2H-indazol-3-yl)methyl)malonate (3ao):**

Orange gum;  $R_f$  (hexane/EtOAc, 9:1) 0.50; Yield 62 mg, 58%;  $^1\text{H}$  NMR (400 MHz,  $\text{CDCl}_3$ )  $\delta$  7.71 (d,  $J = 8.4$  Hz, 1 H), 7.66 (d,  $J = 8.4$  Hz, 1 H), 7.57 – 7.53 (m, 2 H), 7.34 (t,  $J = 7.2$  Hz, 1 H), 7.30 – 7.25 (m, 2 H), 7.13 (t,  $J = 7.2$  Hz, 1 H), 3.70 – 3.68 (m, 2 H), 3.66 – 3.62 (m, 1 H), 3.61 (s, 6 H).  $^{13}\text{C}\{^1\text{H}\}$  NMR (125 MHz,  $\text{CDCl}_3$ )  $\delta$  168.5, 163.0 (d,  $J = 249.0$  Hz), 148.8, 135.9 (d,  $J = 3.2$  Hz), 131.9, 128.4 (d,  $J = 8.8$  Hz), 127.1, 122.2, 121.5, 119.9, 118.0, 116.6 (d,  $J = 23.5$  Hz), 53.0, 50.8, 24.6.  $^{19}\text{F}$  NMR (471 MHz,  $\text{C}_6\text{F}_6/\text{CDCl}_3$ )  $\delta$  50.6; IR (KBr, neat) 2954, 1740, 1627, 1515, 1437, 1223, 1153, 1091, 846, 749  $\text{cm}^{-1}$ ; HRMS (ESI) calcd. for  $\text{C}_{19}\text{H}_{18}\text{FN}_2\text{O}_4(\text{M} + \text{H})^+$  357.1245, found 357.1254.

**Dimethyl 2-((2-(3-fluorophenyl)-2H-indazol-3-yl)methyl)malonate (3ap):**

Orange gum;  $R_f$  (hexane/EtOAc, 9:1) 0.50; Yield 62 mg, 58%;  $^1\text{H}$  NMR (400 MHz,  $\text{CDCl}_3$ )  $\delta$  7.71 (d,  $J = 8.4$  Hz, 1 H), 7.66 (d,  $J = 8.4$  Hz, 1 H), 7.59 – 7.51 (m, 1 H), 7.39 – 7.31 (m, 3 H), 7.29 – 7.23 (m, 1 H), 7.15 (t,  $J = 6.8$  Hz, 1 H), 3.73 (d,  $J = 7.2$  Hz, 2 H), 3.66 (dd,  $J = 8.4$  and 6.8 Hz, 1 H), 3.60 (s, 6 H).  $^{13}\text{C}\{^1\text{H}\}$  NMR (100 MHz,  $\text{CDCl}_3$ )  $\delta$  168.5, 163.0 (d,  $J = 247.8$  Hz), 149.0, 141.2 (d,  $J = 9.8$  Hz), 131.9, 130.9 (d,  $J = 8.9$  Hz), 127.3, 122.3, 122.2 (d,  $J = 3.3$  Hz), 121.7, 120.0, 118.1, 116.7 (d,  $J = 20.8$  Hz), 114.4 (d,  $J = 24.1$  Hz), 53.0, 50.9, 24.7.  $^{19}\text{F}$  NMR (377 MHz,  $\text{C}_6\text{F}_6/\text{CDCl}_3$ )  $\delta$  51.5.; IR (KBr, neat) 2952, 1729, 1607, 1497, 1435, 1345, 1268, 1188, 1023, 896, 741  $\text{cm}^{-1}$ ; HRMS (ESI) calcd. for  $\text{C}_{19}\text{H}_{18}\text{FN}_2\text{O}_4(\text{M} + \text{H})^+$  357.1245, found 357.1247.

**Dimethyl 2-((2-(3-(trifluoromethyl)phenyl)-2H-indazol-3-yl)methyl)malonate (3aq):**

Orange gum;  $R_f$  (hexane/EtOAc, 9:1) 0.45; Yield 55 mg, 45%;  $^1\text{H}$  NMR (400 MHz,  $\text{CDCl}_3$ )  $\delta$  7.89 (s, 1 H), 7.81 (t,  $J = 8.4$  Hz, 2 H), 7.74 (dd,  $J = 7.2$  and 6.8 Hz, 2 H), 7.68 (d,  $J = 8.4$  Hz, 1 H), 7.36 (t,  $J = 6.8$  Hz, 1 H), 7.15 (t,  $J = 7.2$  Hz, 1 H), 3.76 – 3.65 (m, 3 H), 3.61 (s, 6 H).  $^{13}\text{C}\{^1\text{H}\}$  NMR (100 MHz,  $\text{CDCl}_3$ )  $\delta$  168.5, 149.3, 140.5, 132.3 (q,  $J = 35$  Hz), 130.3, 129.8, 127.5, 126.3 (q,  $J = 3.7$  Hz), 125.0, 123.8 (q,  $J = 3.7$  Hz), 122.5, 122.2, 121.7, 120.0, 118.1, 53.1, 51.0, 24.8.  $^{19}\text{F}$  NMR (471 MHz,  $\text{C}_6\text{F}_6/\text{CDCl}_3$ )  $\delta$  99.1.; IR (KBr, neat) 2954, 1734, 1612, 1530, 1437, 1330, 1278, 1128, 1071, 906, 751  $\text{cm}^{-1}$ ; HRMS (ESI) calcd. for  $\text{C}_{20}\text{H}_{18}\text{F}_3\text{N}_2\text{O}_4(\text{M} + \text{H})^+$  407.1213, found 407.1219.

**Dimethyl 2-((2-(4-(methoxycarbonyl)phenyl)-2H-indazol-3-yl)methyl)malonate (3ar):**

Orange gum;  $R_f$  (hexane/EtOAc, 1:4) 0.40; Yield 93 mg, 78%;  $^1\text{H}$  NMR (400 MHz,  $\text{CDCl}_3$ ) 8.25 (d,  $J = 8.4$  Hz, 2 H), 7.72 (d,  $J = 8.4$  Hz, 1 H), 7.69-7.64 (m, 3 H), 7.33 (t,  $J = 7.6$  Hz, 1 H), 7.12 (t,  $J = 7.6$  Hz, 1 H), 3.98 (s, 3 H), 3.74 (d,  $J = 8.0$  Hz, 2 H), 3.62 (t,  $J = 8.0$  Hz, 1 H), 3.58 (s, 6 H).  $^{13}\text{C}\{^1\text{H}\}$  NMR (100 MHz,  $\text{CDCl}_3$ )  $\delta$  168.4, 166.3, 149.2, 143.6, 131.9, 131.1, 131.0, 127.4, 126.3,

122.4, 121.9, 120.0, 118.1, 53.0, 52.7, 50.9, 24.8; IR (KBr, neat) 2957, 1729, 1605, 1517, 1437, 1373, 1275, 1108, 866, 750  $\text{cm}^{-1}$ ; HRMS (ESI) calcd. for  $\text{C}_{21}\text{H}_{21}\text{N}_2\text{O}_6(\text{M} + \text{H})^+$  397.1394, found 397.1409.

**Dimethyl 2-((6-bromo-2-phenyl-2*H*-indazol-3-yl)methyl)malonate (3ba):**

Orange gum;  $R_f$  (hexane/EtOAc, 9:1) 0.50; Yield 75 mg, 60%;  $^1\text{H}$  NMR (400 MHz,  $\text{CDCl}_3$ )  $\delta$  7.89 (s, 1 H), 7.58 – 7.51 (m, 6 H), 7.18 (d,  $J = 8.0$  Hz, 1 H), 3.67 (d,  $J = 8.0$  Hz, 2 H), 3.58 (s, 6 H), 3.54 (t,  $J = 8.0$  Hz, 1 H).  $^{13}\text{C}\{^1\text{H}\}$  NMR (100 MHz,  $\text{CDCl}_3$ )  $\delta$  168.5, 149.4, 139.5, 132.6, 129.9, 129.8, 126.4, 125.9, 121.6, 121.1, 120.4, 120.2, 53.1, 50.8, 24.6. IR (KBr, neat) 2954, 1734, 1622, 1502, 1435, 1373, 1258, 1181, 1036, 918, 764, 696  $\text{cm}^{-1}$ ; HRMS (ESI) calcd. for  $\text{C}_{19}\text{H}_{18}\text{BrN}_2\text{O}_4((\text{M}+2) + \text{H})^+$  419.0444, found 419.0427.

**Dimethyl 2-((5-chloro-2-phenyl-2*H*-indazol-3-yl)methyl)malonate (3ca):**

Orange gum;  $R_f$  (hexane/EtOAc, 9:1) 0.50; Yield 61 mg, 55%;  $^1\text{H}$  NMR (400 MHz,  $\text{CDCl}_3$ )  $\delta$  7.65 (d,  $J = 8.8$  Hz, 2 H), 7.59 – 7.51 (m, 5 H), 7.27 – 7.23 (m, 1 H), 3.65 (d,  $J = 8.0$  Hz, 2 H), 3.60 (s, 6 H), 3.55 (t,  $J = 8.0$  Hz, 1 H).  $^{13}\text{C}\{^1\text{H}\}$  NMR (100 MHz,  $\text{CDCl}_3$ )  $\delta$  168.4, 147.2, 139.6, 131.7, 129.8, 129.7, 128.4, 127.7, 126.4, 122.0, 119.7, 118.8, 53.1, 50.9, 24.6. IR (KBr, neat) 2952, 1734, 1600, 1505, 1437, 1340, 1268, 1156, 1043, 916, 801, 766  $\text{cm}^{-1}$ ; HRMS (ESI) calcd. for  $\text{C}_{19}\text{H}_{18}\text{ClN}_2\text{O}_4(\text{M} + \text{H})^+$  373.0950, found 373.0946.

**Dimethyl 2-((5,6-dimethoxy-2-phenyl-2*H*-indazol-3-yl)methyl)malonate (3da):**

Brown gum;  $R_f$  (hexane/EtOAc, 7:3) 0.40; Yield 30 mg, 25%;  $^1\text{H}$  NMR (400 MHz,  $\text{CDCl}_3$ )  $\delta$  7.58 – 7.49 (m, 5 H), 6.98 (s, 1 H), 6.85 (s, 1 H), 3.97 (d,  $J = 2.0$  Hz, 6 H), 3.65 (d,  $J = 8.0$  Hz, 2 H), 3.59 (s, 6 H), 3.52 (t,  $J = 8.0$  Hz, 1 H).  $^{13}\text{C}\{^1\text{H}\}$  NMR (100 MHz,  $\text{CDCl}_3$ )  $\delta$  168.8, 152.2, 148.2, 145.6, 140.1, 130.5, 129.6, 129.2, 126.4, 116.3, 97.0, 95.9, 56.3, 56.1, 53.0, 50.9, 24.7. IR (KBr,

neat) 2929, 1732, 1596, 1510, 1437, 1330, 1218, 1166, 1013, 769  $\text{cm}^{-1}$ ; HRMS (ESI) calcd. for  $\text{C}_{21}\text{H}_{23}\text{N}_2\text{O}_6$  ( $\text{M} + \text{H}$ )<sup>+</sup> 399.1551, found 399.1552.

**Dimethyl 2-((5-methoxy-2-(4-methoxyphenyl)-2H-indazol-3-yl)methyl)malonate (3ef):**

Colourless liquid;  $R_f$  (hexane/EtOAc, 7:3) 0.45; Yield 36 mg, 30%;  $^1\text{H}$  NMR (500 MHz,  $\text{CDCl}_3$ )  $\delta$  7.59 (d,  $J = 9.0$  Hz, 1 H), 7.42 (d,  $J = 8.5$  Hz, 2 H), 7.04 (d,  $J = 8.5$  Hz, 2 H), 7.01 (dd,  $J = 9.0$  and 2.0 Hz, 1 H), 6.82 (s, 1 H), 3.89 (s, 3 H), 3.87 (s, 3 H), 3.61 (d,  $J = 7.5$  Hz, 2 H), 3.58 (s, 6 H), 3.53 (t,  $J = 7.5$  Hz, 1 H).  $^{13}\text{C}\{^1\text{H}\}$  NMR (125 MHz,  $\text{CDCl}_3$ )  $\delta$  168.8, 160.3, 155.2, 145.5, 132.9, 130.6, 127.7, 121.9, 121.4, 119.3, 114.7, 96.1, 55.8, 55.7, 53.0, 50.8, 24.7. IR (KBr, neat) 2942, 1755, 1737, 1596, 1581, 1436, 1330, 1216, 1024, 842, 769  $\text{cm}^{-1}$ ; HRMS (ESI) calcd. for  $\text{C}_{21}\text{H}_{23}\text{N}_2\text{O}_6$  ( $\text{M} + \text{H}$ )<sup>+</sup> 399.1551, found 399.1548.

**Diethyl 2-((2-phenyl-2H-indazol-3-yl)methyl)malonate (3fa):**

Colourless gum;  $R_f$  (hexane/EtOAc, 4:1) 0.50; Yield 55 mg, 50%;  $^1\text{H}$  NMR (400 MHz,  $\text{CDCl}_3$ )  $\delta$  7.69 (dd,  $J = 13.6$  and 8.8 Hz, 2 H), 7.59 – 7.52 (m, 5 H), 7.31 (t,  $J = 7.2$  Hz, 1 H), 7.10 (t,  $J = 7.2$  Hz, 1 H), 4.06 – 3.96 (m, 4 H), 3.70 (d,  $J = 8.0$  Hz, 2 H), 3.55 (t,  $J = 8.0$  Hz, 1 H), 1.08 (t,  $J = 7.2$  Hz, 6 H).  $^{13}\text{C}\{^1\text{H}\}$  NMR (100 MHz,  $\text{CDCl}_3$ )  $\delta$  168.3, 148.9, 140.0, 132.0, 129.7, 129.5, 127.0, 126.5, 121.9, 121.7, 120.2, 118.0, 62.0, 51.1, 24.6, 14.0. IR (KBr, neat) 2984, 1729, 1597, 1502, 1455, 1370, 1273, 1156, 1028, 856, 746  $\text{cm}^{-1}$ ; HRMS (ESI) calcd. for  $\text{C}_{21}\text{H}_{23}\text{N}_2\text{O}_4$  ( $\text{M} + \text{H}$ )<sup>+</sup> 367.1652, found 367.1654.

**Experimental procedure for the synthesis of 4 and 5:**

To a stirred solution of LiCl (65 mg, 1.5 mmol) in DMSO (2 mL) and  $\text{H}_2\text{O}$  (10  $\mu\text{L}$ ) at room temperature was added compound **3aa** (100 mg, 0.3 mmol) under nitrogen atmosphere. Then, the reaction was refluxed for 10 h. After completion of starting material, the reaction was cooled to room temperature; diluted with cold water and then extracted with DCM (3x 20 mL). The

combined organic layers were dried over Na<sub>2</sub>SO<sub>4</sub> and concentrated in rotary evaporator. The crude was subjected to column chromatography over silica gel to give the corresponding products **4** and **5** in 60% and 30% yield respectively.

**Methyl 3-(2-phenyl-2H-indazol-3-yl)propanoate (4):**

Colourless gum; R<sub>f</sub> (hexane/EtOAc, 4:1) 0.60; Yield 51 mg, 60%; <sup>1</sup>H NMR (400 MHz, CDCl<sub>3</sub>) δ 7.72 (dd, *J* = 17.6 and 8.8 Hz, 2 H), 7.59 – 7.51 (m, 5 H), 7.34 (t, *J* = 8.0 Hz, 1 H), 7.2 (t, *J* = 8.0 Hz, 1 H), 3.62 (s, 3 H), 3.42 (t, *J* = 8.0 Hz, 2 H), 2.64 (t, *J* = 8.0 Hz, 2 H). <sup>13</sup>C{<sup>1</sup>H} NMR (100 MHz, CDCl<sub>3</sub>) δ 172.5, 148.9, 140.1, 134.5, 129.6, 129.4, 127.0, 126.4, 121.7, 121.2, 120.1, 118.0, 52.1, 33.5, 21.0. IR (KBr, neat) 2952, 1732, 1597, 1437, 1373, 1198, 1073, 916, 744 cm<sup>-1</sup>; HRMS (ESI) calcd. for C<sub>17</sub>H<sub>17</sub>N<sub>2</sub>O<sub>2</sub> (M + H)<sup>+</sup> 281.1285, found 281.1284.

**Experimental procedure for the synthesis of 5 from 4:**

To a stirred solution of compound **4** (84 mg, 0.3 mmol) in THF (5 mL) was added a solution of LiOH.H<sub>2</sub>O (72 mg, 3.0 mmol) in MeOH and H<sub>2</sub>O (4:1, 5 mL) and the resulting mixture was allowed to stir at room temperature for overnight. After complete consumption of starting material, the reaction mixture was quenched with 1N HCl and pH 1-2 was maintained, and then organic layer was extracted with DCM. Thereafter, the organic layer was washed brine solution 2-3 times. The combined organic layers were dried over Na<sub>2</sub>SO<sub>4</sub> and concentrated in rotary evaporator. The crude was subjected to column chromatography over silica gel to obtain the corresponding product **5** in 90% yield.

**3-(2-Phenyl-2H-indazol-3-yl)propanoic acid (5):**

White solid; R<sub>f</sub> (EtOAc, 100%) 0.80; mp 187-188.88 °C Yield 24 mg, 30%; <sup>1</sup>H NMR (400 MHz, DMSO-d<sub>6</sub>) δ 12.23 (bs, 1 H), 7.82 (d, *J* = 8.4 Hz, 1 H), 7.65 – 7.56 (m, 6 H), 7.30 (t, *J* = 8.0 Hz, 1 H), 7.07 (t, *J* = 8.0 Hz, 1 H), 3.30 (t, *J* = 7.6 Hz, 2 H), 2.57 (t, *J* = 7.6 Hz, 2 H). <sup>13</sup>C{<sup>1</sup>H} NMR (100



MHz, DMSO- $d_6$ )  $\delta$  173.5, 148.4, 140.1, 135.4, 129.8, 129.5, 126.9, 126.6, 121.2, 121.1, 117.6, 33.2, 21.0. IR (KBr, neat) 3319, 2949, 2830, 1667, 1457, 1250, 1021, 819, 759  $\text{cm}^{-1}$ ; HRMS (ESI) calcd. for  $\text{C}_{16}\text{H}_{15}\text{N}_2\text{O}_2$  ( $\text{M} + \text{H}$ )<sup>+</sup> 267.1128, found 267.1116.

#### **Experimental procedure for the synthesis of 6:**

To a stirred solution of LAH (45 mg, 1.2 mmol) in THF (5 mL) kept at 0 °C, compound **4** (84 mg, 0.3 mmol) was added dropwise. The reaction mixture was slowly brought to room temperature and allowed to stir for 4 h. After complete consumption of starting material, the reaction mixture was diluted with EtOAc and washed with saturated  $\text{NH}_4\text{Cl}$  solution. The organic layer was extracted, dried over  $\text{Na}_2\text{SO}_4$  and concentrated in rotary evaporator. The crude was subjected to column chromatography over silica gel to obtain the corresponding product **6** in 82% yield.

#### **3-(2-Phenyl-2H-indazol-3-yl)propan-1-ol (6):**

Colourless gum;  $R_f$  (hexane/EtOAc, 1:1) 0.40; Yield 62 mg, 82%;  $^1\text{H}$  NMR (400 MHz,  $\text{CDCl}_3$ )  $\delta$  7.73-7.68 (m, 2 H), 7.52-7.50 (m, 5 H), 7.34 (t,  $J = 7.6$  Hz, 1 H), 7.09 (t,  $J = 7.6$  Hz, 1 H), 3.56-3.53 (m, 2 H), 3.20-3.12 (m, 2 H), 2.02 (bs, 1 H), 1.89 – 1.80 (m, 2 H).  $^{13}\text{C}\{^1\text{H}\}$  NMR (100 MHz,  $\text{CDCl}_3$ )  $\delta$  148.8, 140.1, 136.4, 129.4, 129.2, 127.0, 126.4, 121.3, 120.3, 117.8, 61.6, 32.2, 21.8. IR (KBr, neat) 3069, 2937, 1627, 1600, 1505, 1457, 1375, 1280, 1181, 1066, 936, 744  $\text{cm}^{-1}$ ; HRMS (ESI) calcd. for  $\text{C}_{16}\text{H}_{17}\text{N}_2\text{O}$  ( $\text{M} + \text{H}$ )<sup>+</sup> 253.1335, found 253.1336.

#### **Experimental procedure for the synthesis of 7:**

Compound **7** was prepared as per literature,<sup>4</sup> to a stirred solution of compound **5** (45 mg, 0.3 mmol), DIPEA (45 mg, 0.66 mmol) in DCM (5 mL), NosylOXY (45 mg, 0.3 mmol) was added. The reaction mixture was stirred for 15 min followed by addition of aniline (84 mg, 0.3 mmol) dropwise. Stirring of the reaction mixture was continued till 6 h. After completion of the reaction, the reaction mixture was diluted with 50 mL of ethyl acetate; the organic phase was washed with

1N HCl (3 × 10 mL) and saturated NaHCO<sub>3</sub> (3 × 10 mL). The organic layer was extracted, dried over Na<sub>2</sub>SO<sub>4</sub> and concentrated in rotary evaporator. The crude was subjected to column chromatography over silica gel to obtain the corresponding product **7** in 50% yield.

***N*-phenyl-3-(2-phenyl-2*H*-indazol-3-yl)propanamide (7):**

Orange gum; *R<sub>f</sub>* (hexane/EtOAc, 2:3) 0.40; mp 185-187 °C Yield 52 mg, 50%; <sup>1</sup>H NMR (500 MHz, CDCl<sub>3</sub>) δ 7.70-7.65 (m, 2 H), 7.42 – 7.31 (m, 7 H), 7.27 – 7.23 (m, 3 H), 7.10 – 7.05 (m, 2 H), 3.46 – 3.36 (m, 2 H), 2.54 – 2.43 (m, 2 H). <sup>13</sup>C{<sup>1</sup>H} NMR (125 MHz, CDCl<sub>3</sub>) δ 169.4, 148.9, 139.7, 138.0, 135.5, 129.6, 129.4, 129.1, 127.3, 126.2, 124.5, 121.8, 121.2, 120.4, 120.1, 117.7, 36.6, 21.0. IR (KBr, neat) 3193, 2902, 1684, 1598, 1499, 1441, 1378, 1249, 1046, 751, 695 cm<sup>-1</sup>; HRMS (ESI) calcd. for C<sub>22</sub>H<sub>20</sub>N<sub>3</sub>O (M + H)<sup>+</sup> 342.1601, found 342.1596.

<sup>1</sup>H spectrum of compound **1b'** (400 MHz, CDCl<sub>3</sub>)

BR-COND-1H  
BR-COND-1H

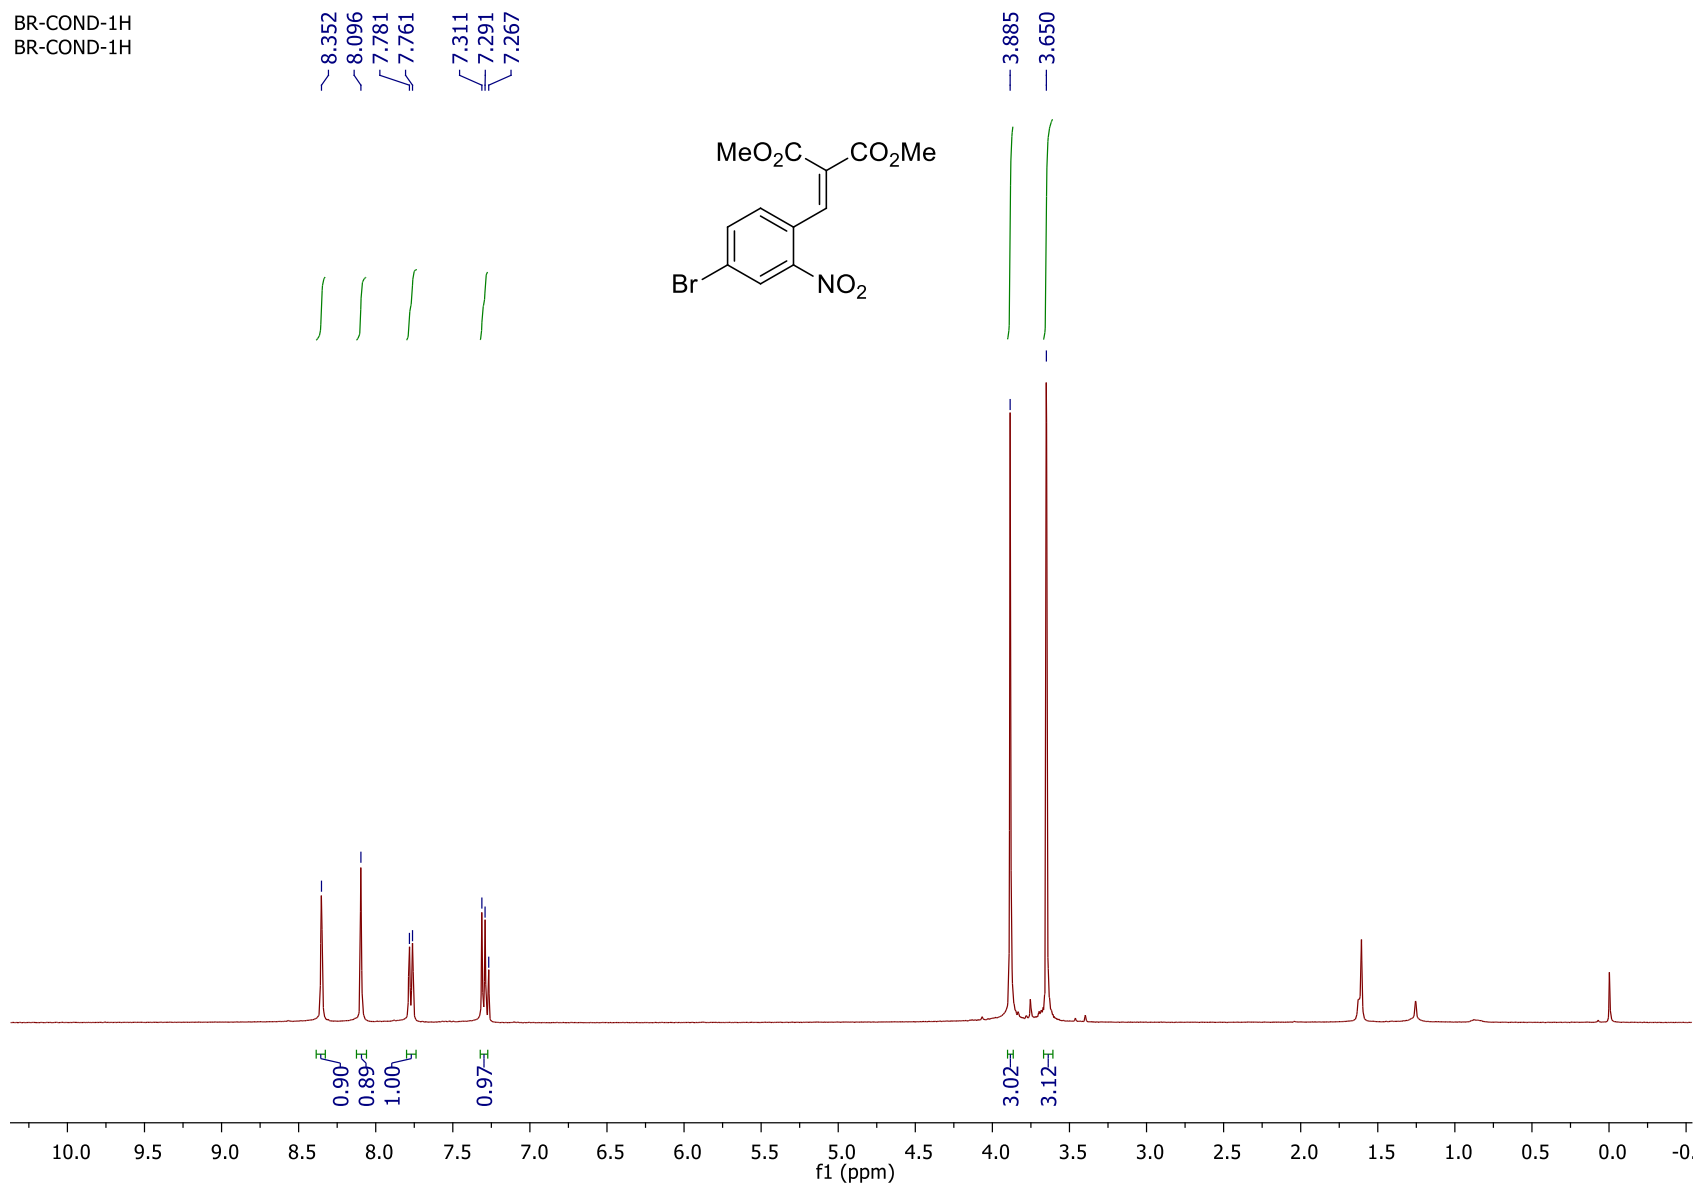

<sup>13</sup>C spectrum of compound **1b'** (100 MHz, CDCl<sub>3</sub>)

BR-COND-13C  
BR-COND-13C

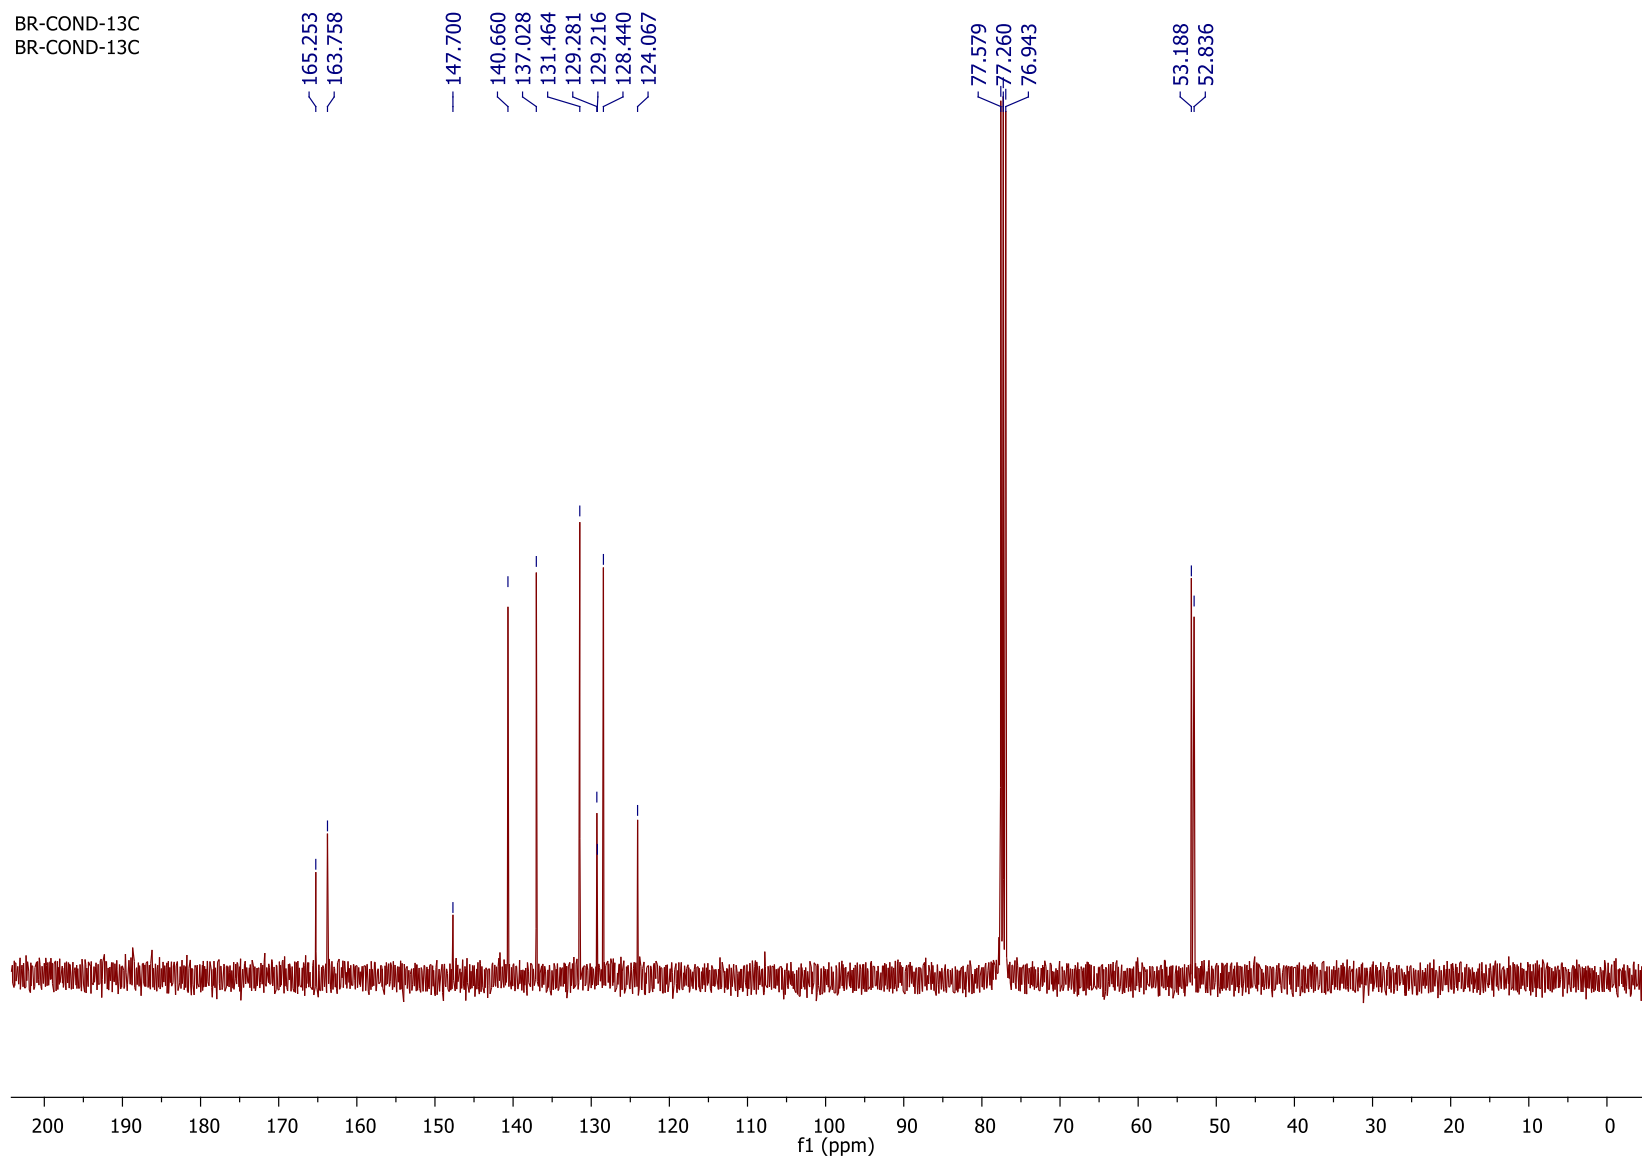

<sup>1</sup>H spectrum of compound **1c'** (400 MHz, CDCl<sub>3</sub>)

cl-cond-1H  
cl-cond-1H

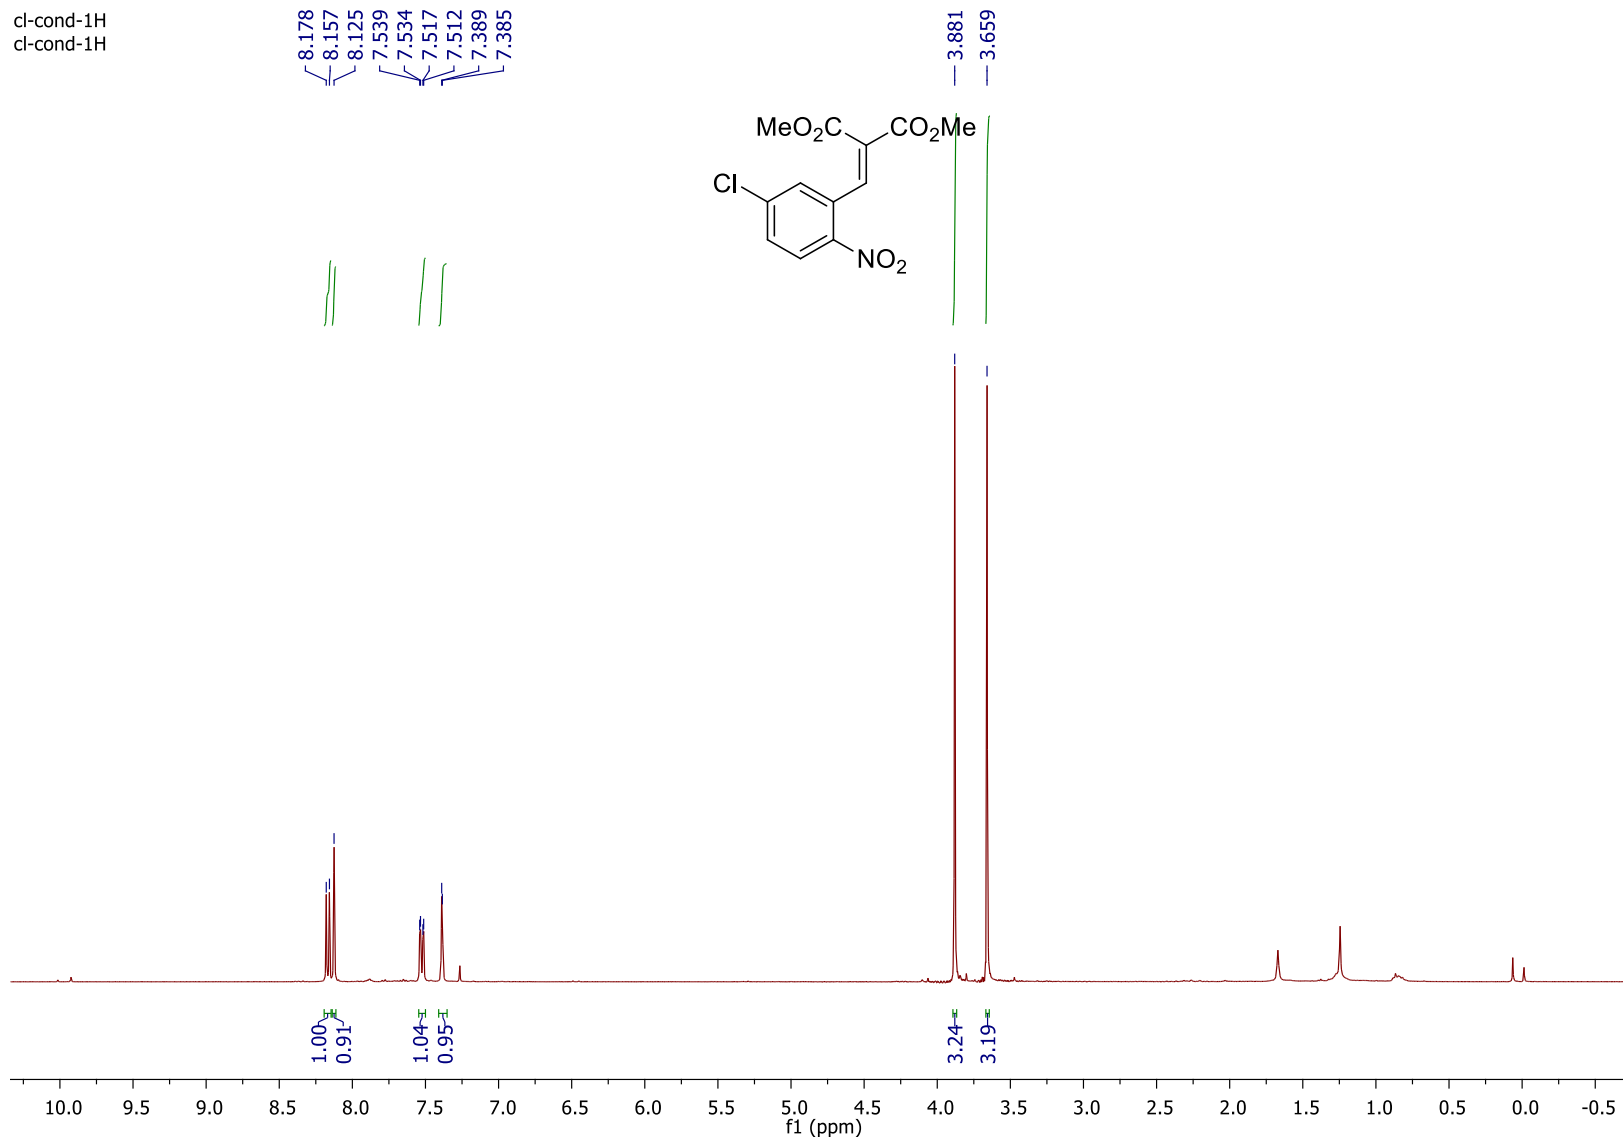

$^{13}\text{C}$  spectrum of compound **1c'** (100 MHz,  $\text{CDCl}_3$ )

cl-cond-13C  
cl-cond-13C

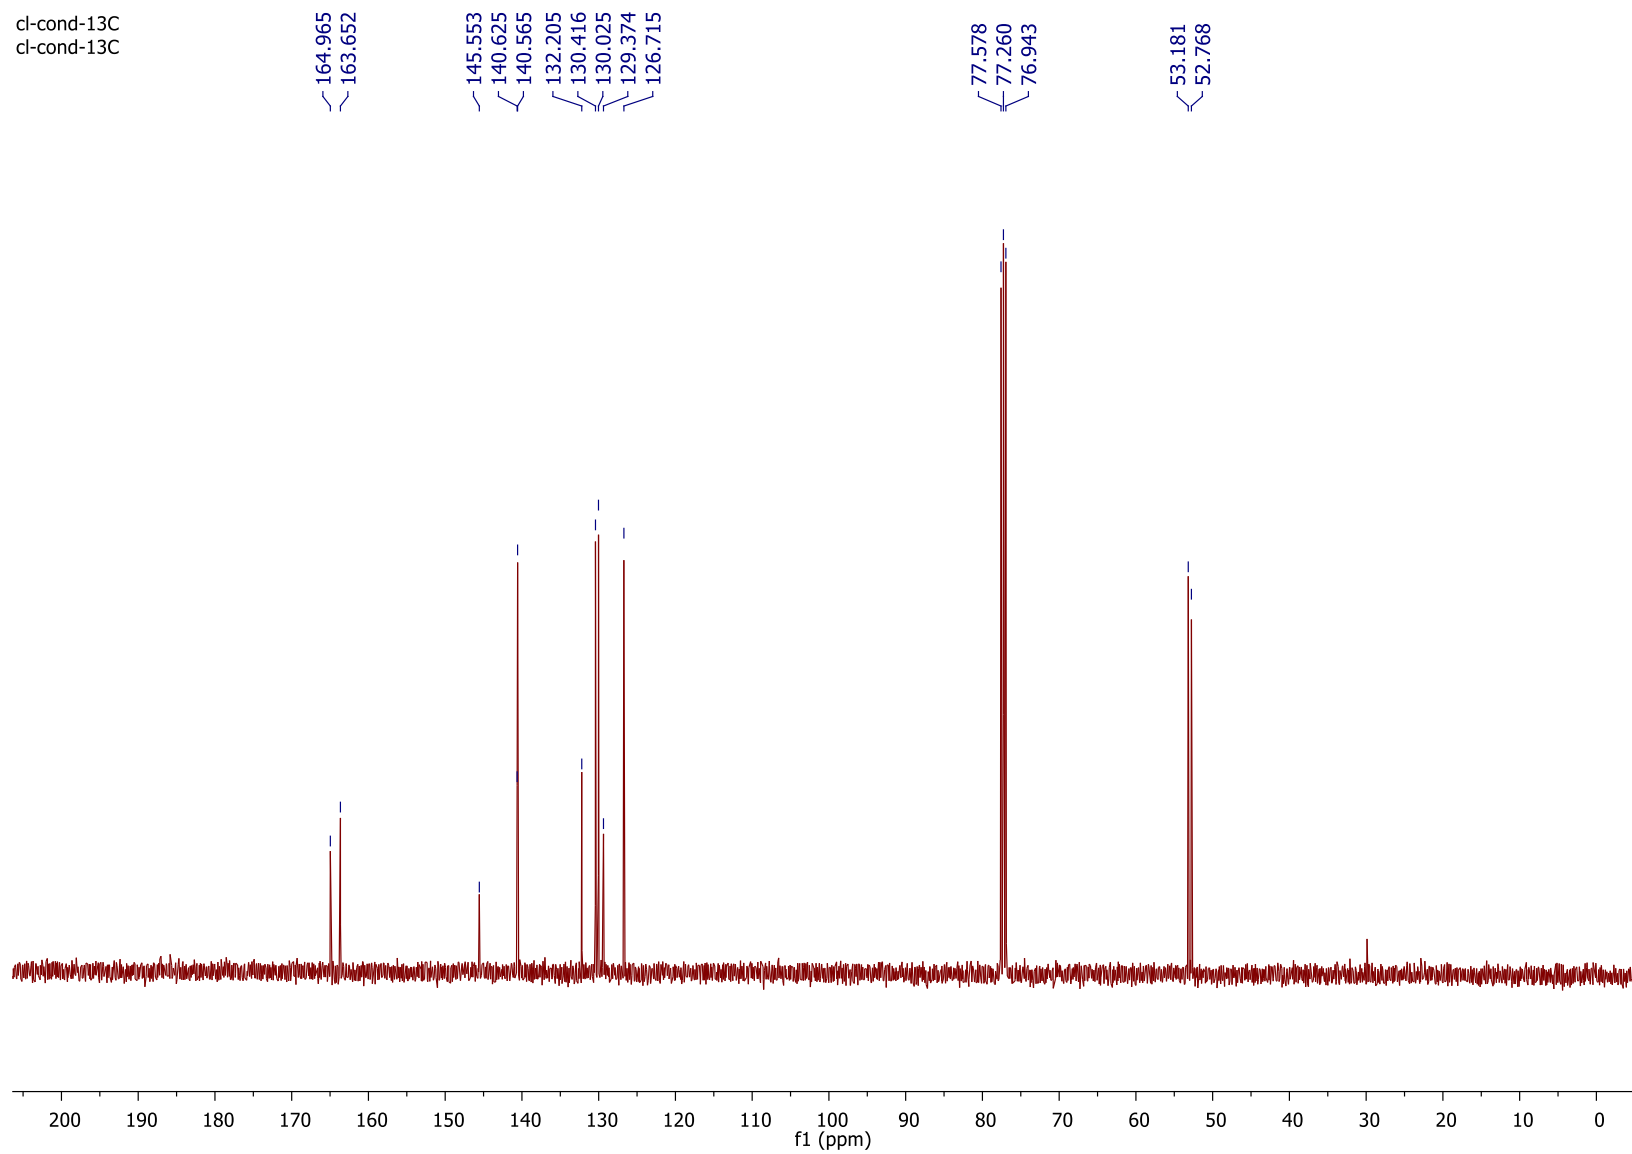

<sup>1</sup>H spectrum of compound **1d'** (500 MHz, CDCl<sub>3</sub>)

SKB-ARC-01-1H  
SKB-ARC-01-1H

8.225  
7.766  
7.279  
6.881  
3.991  
3.935  
3.884  
3.667

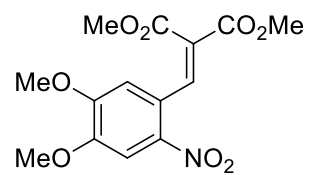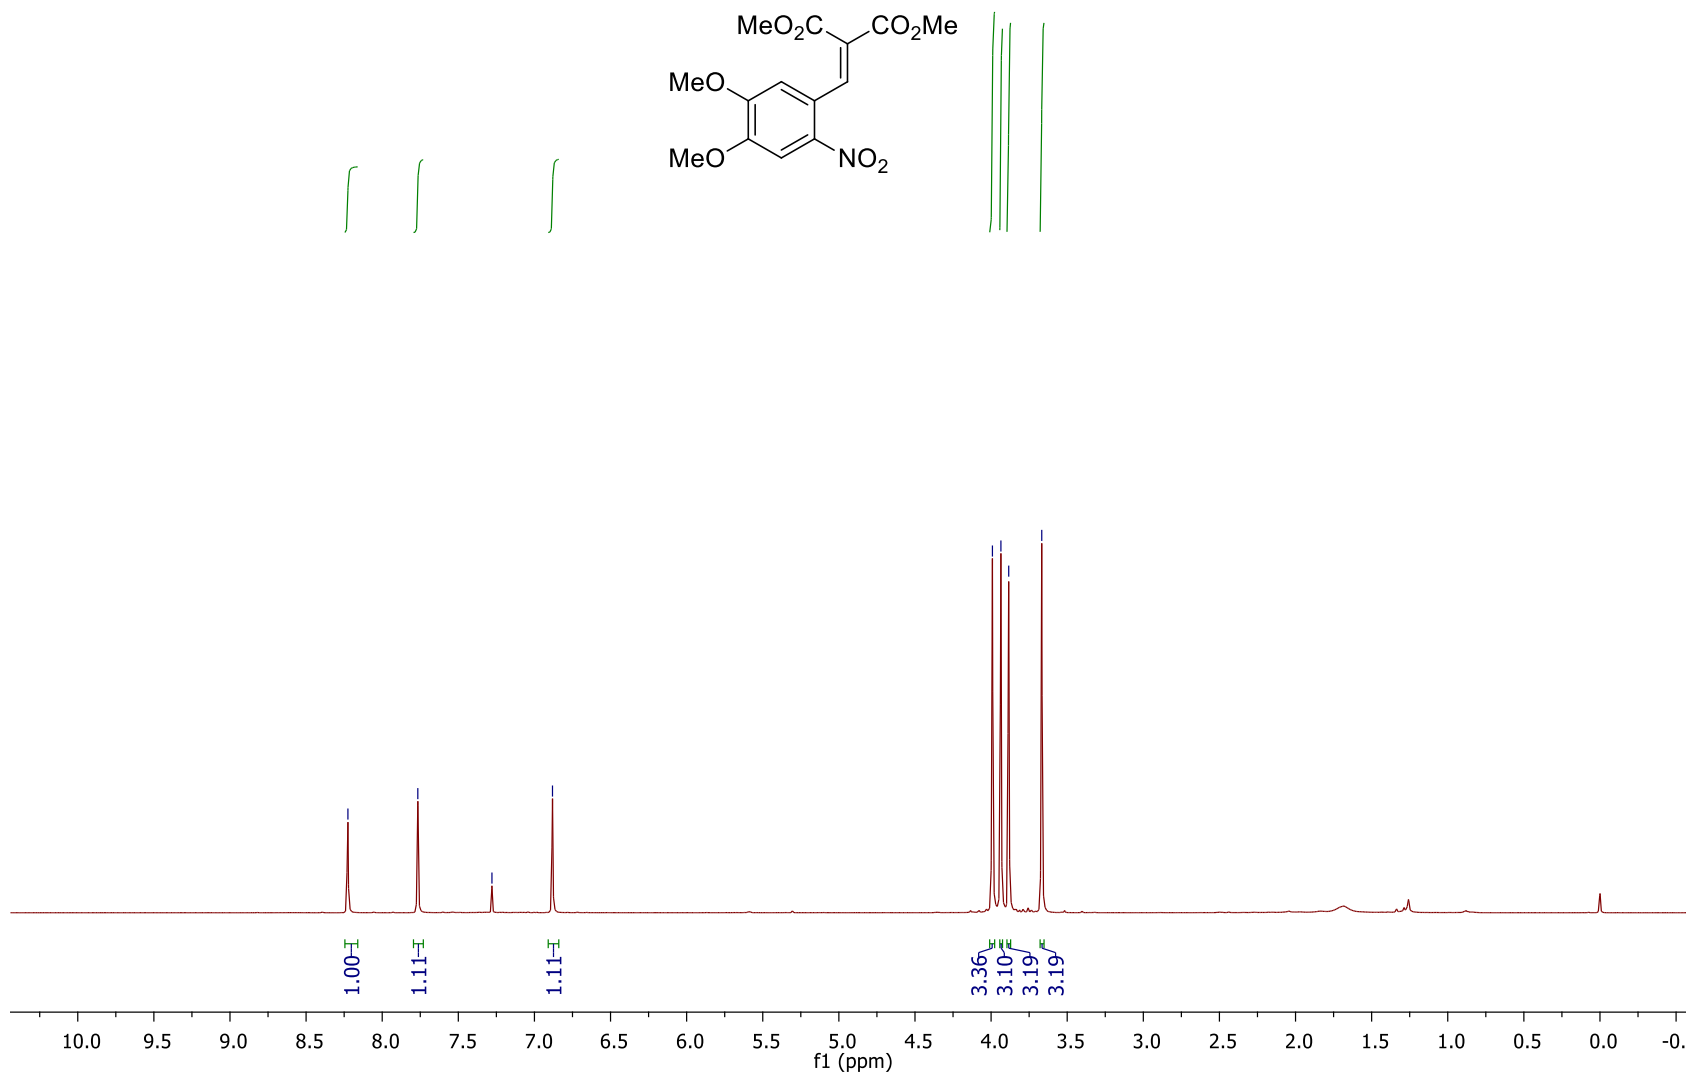

<sup>13</sup>C spectrum of compound **1d'** (125 MHz, CDCl<sub>3</sub>)

SKB-ARC-01-13C  
SKB-ARC-01-13C

~ 166.159  
~ 164.054

— 153.501  
— 149.843

~ 142.043  
~ 140.280

— 127.912  
— 124.563

— 111.551  
— 108.153

└ 77.514  
└ 77.260  
└ 77.005

└ 56.831  
└ 56.713  
└ 53.036  
└ 52.809

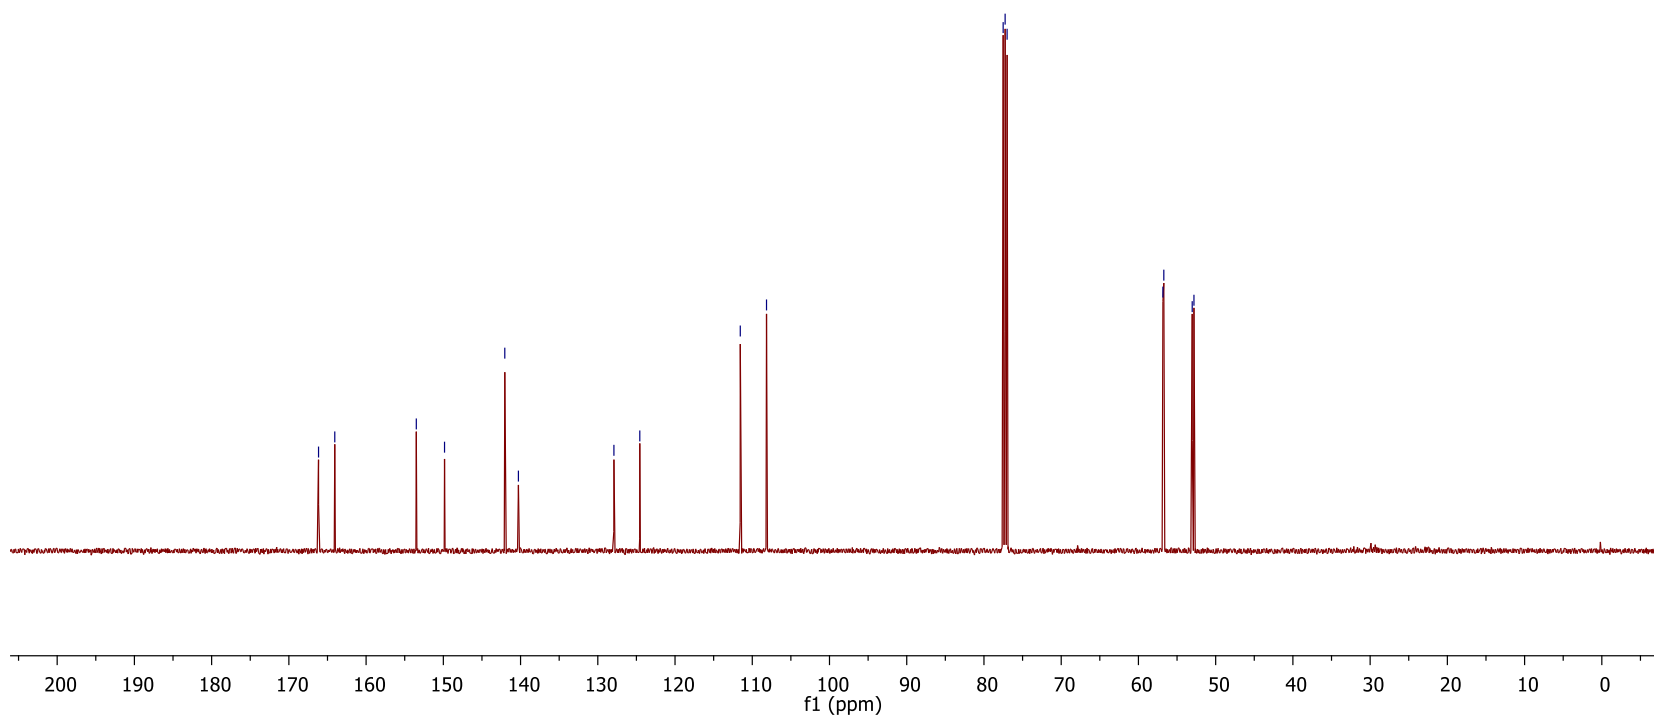



<sup>1</sup>H spectrum of compound **1e'** (500 MHz, CDCl<sub>3</sub>)

OME-COND-1H  
OME-COND-1H

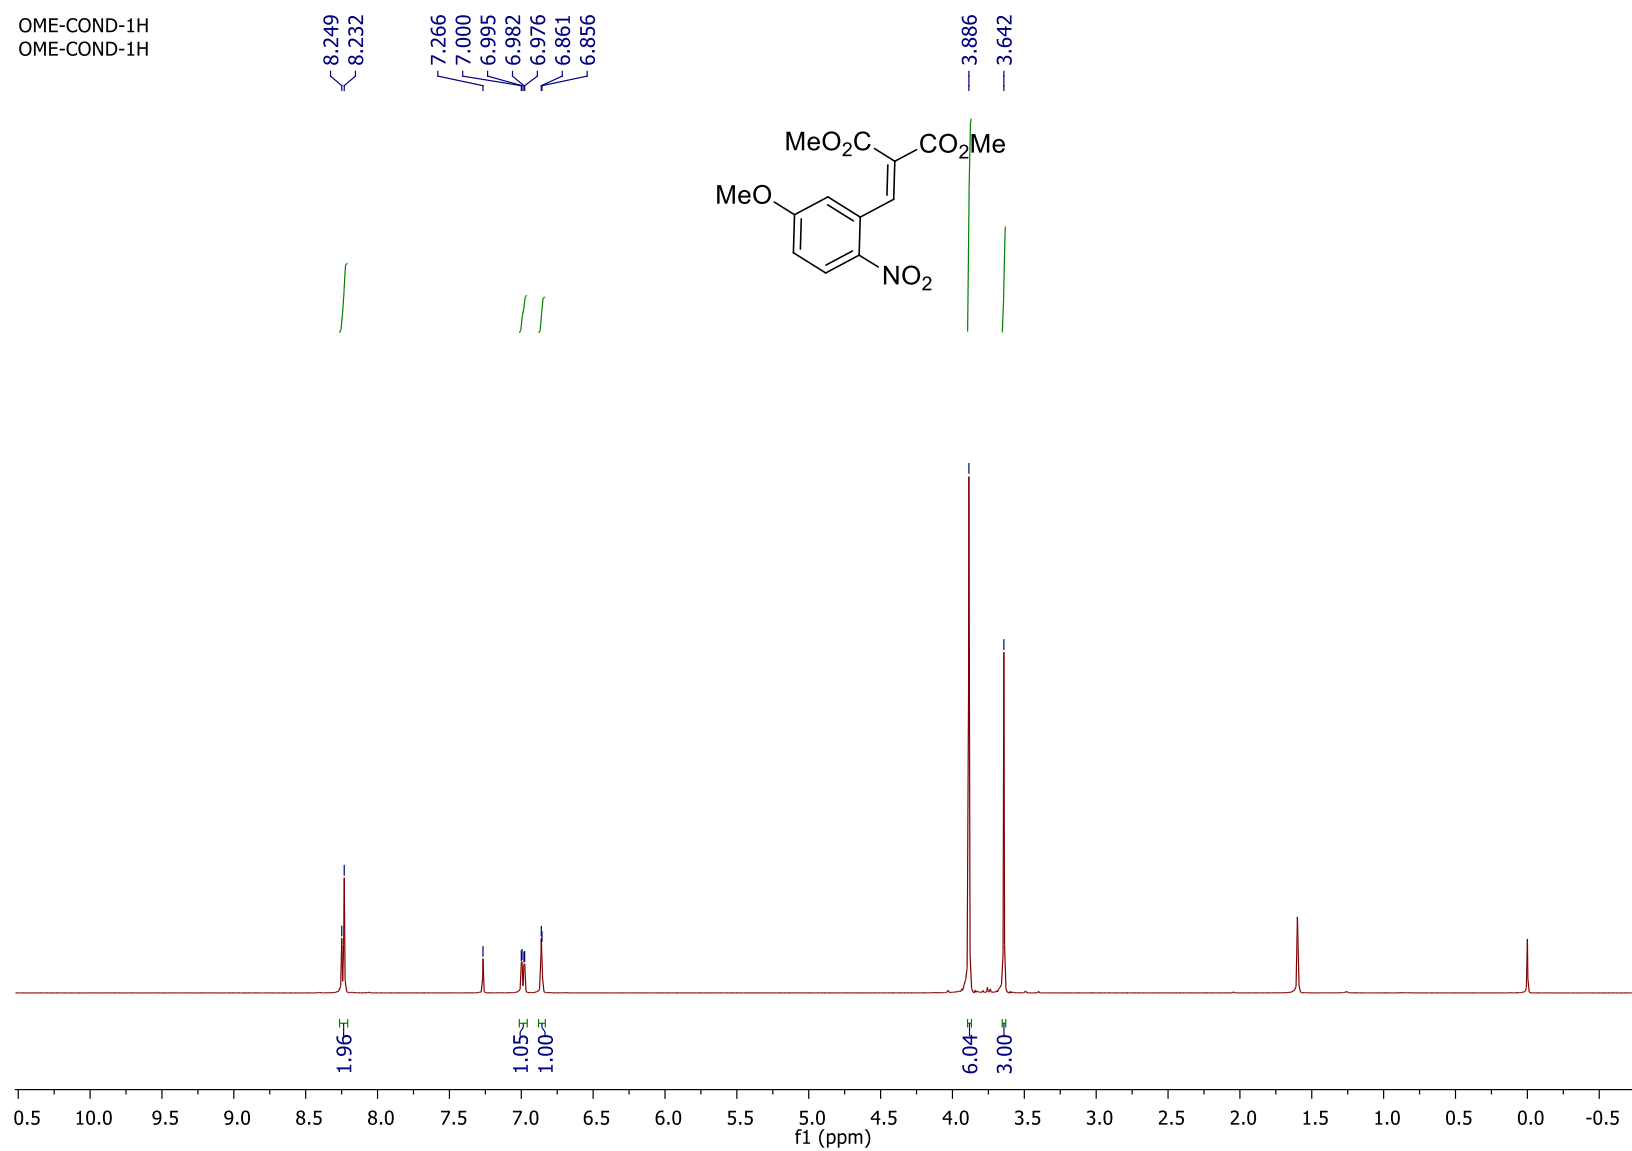

$^{13}\text{C}$  spectrum of compound **1e'** (125 MHz,  $\text{CDCl}_3$ )

OME-COND-13C  
OME-COND-13C

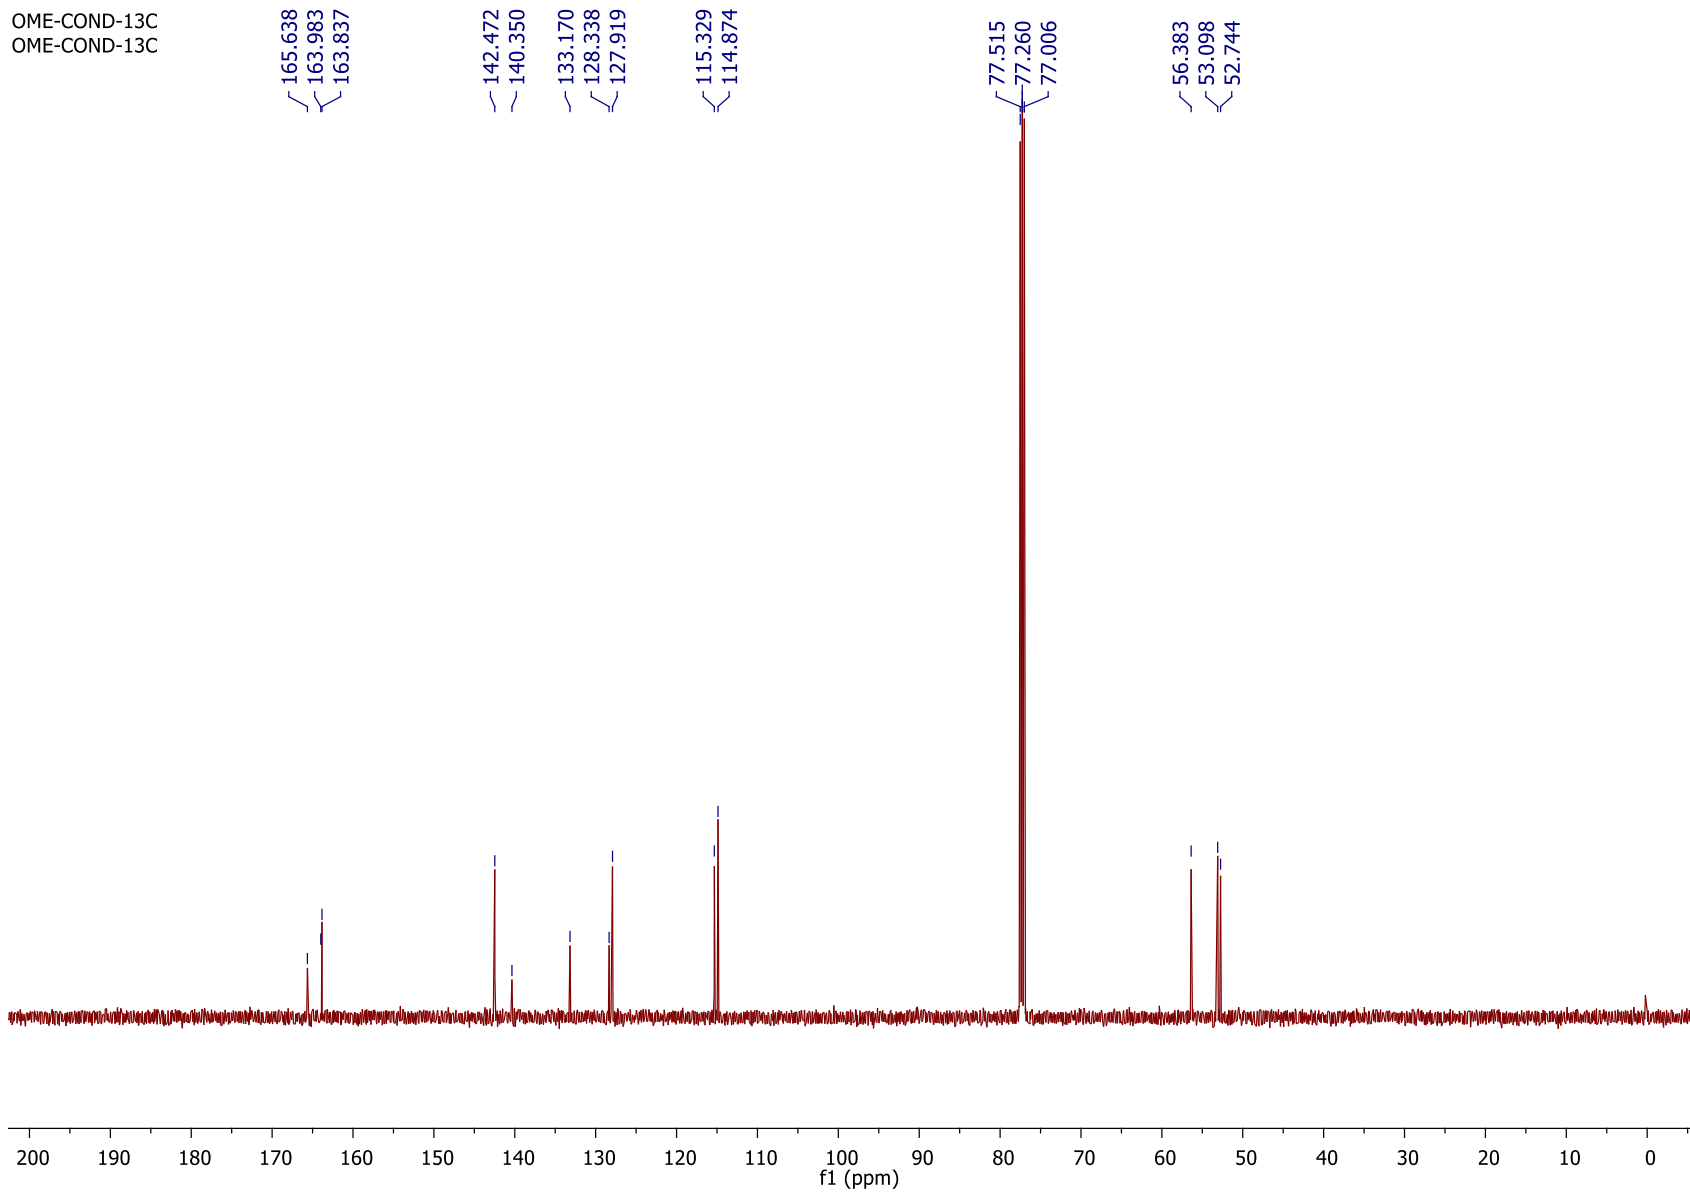

<sup>1</sup>H spectrum of compound **1b** (500 MHz, CDCl<sub>3</sub>)

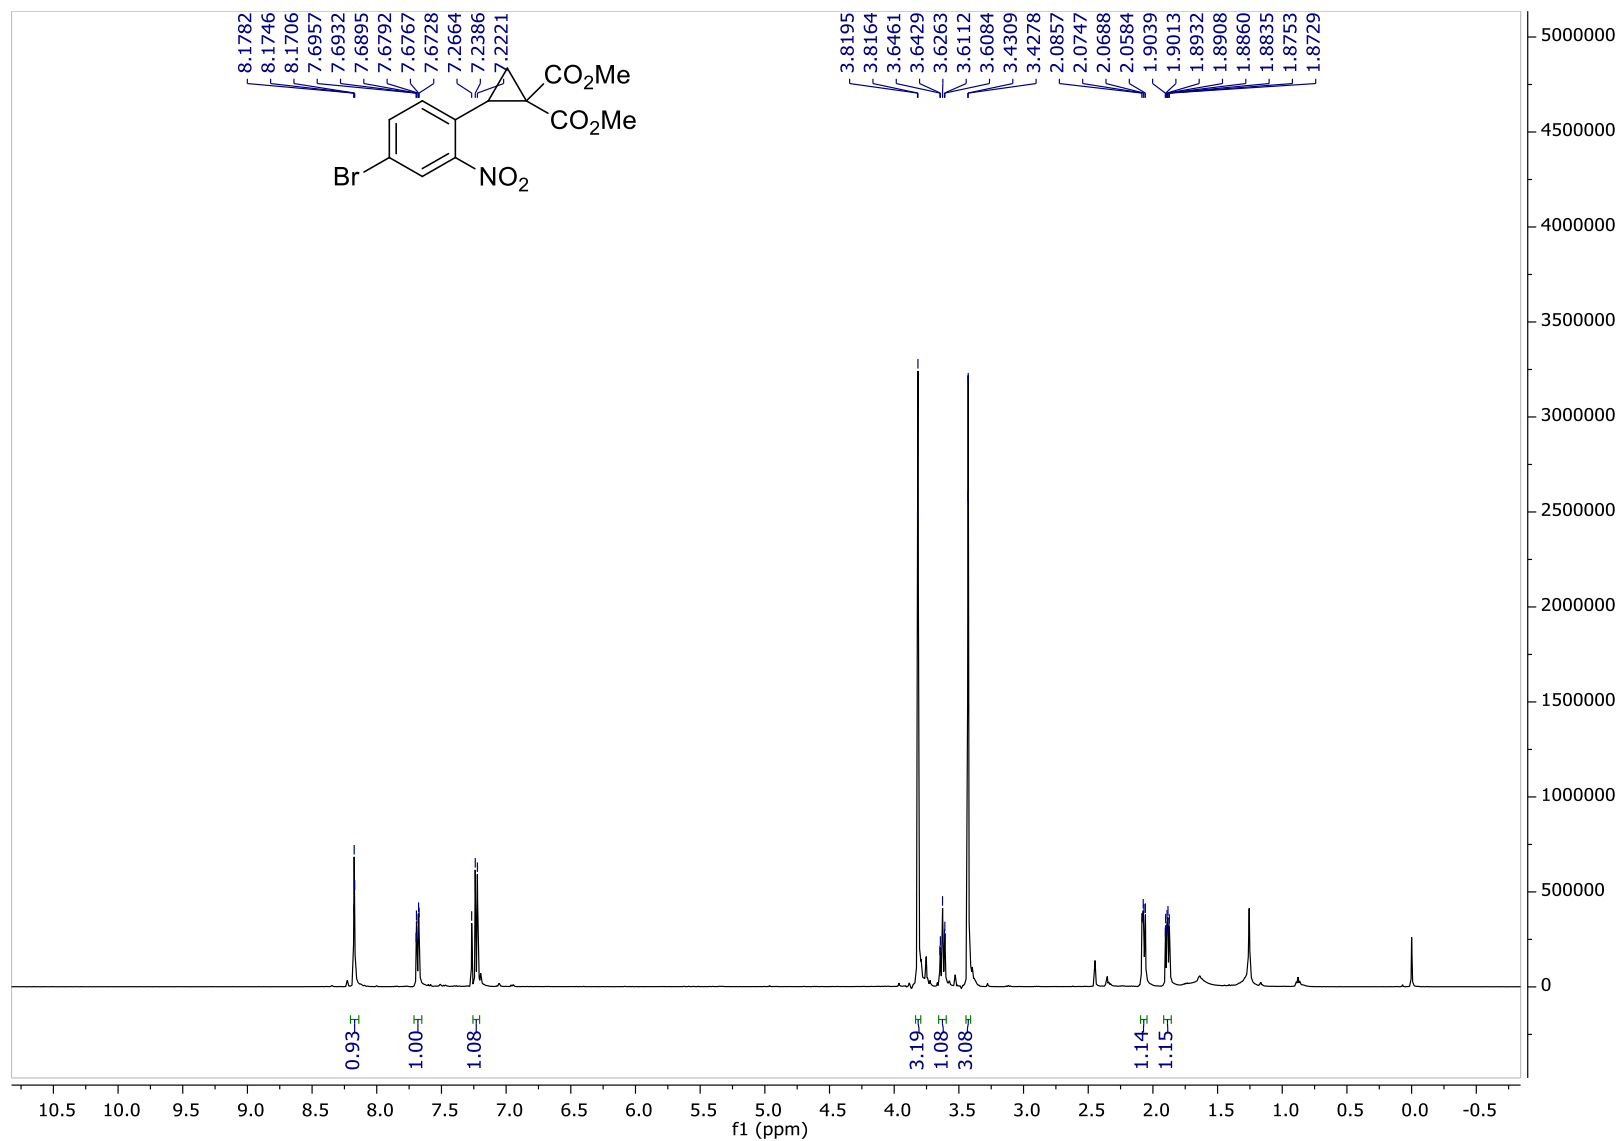

$^{13}\text{C}$  spectrum of compound **1b** (125 MHz,  $\text{CDCl}_3$ )

BR-CP-SM-13C  
BR-CP-SM-13C

~ 169.548  
~ 167.216

— 150.750

~ 136.417  
~ 132.752  
~ 130.072  
~ 128.124  
~ 122.193

~ 77.514  
~ 77.260  
~ 77.007

~ 53.319  
~ 52.916

— 35.899

— 30.404

— 19.639

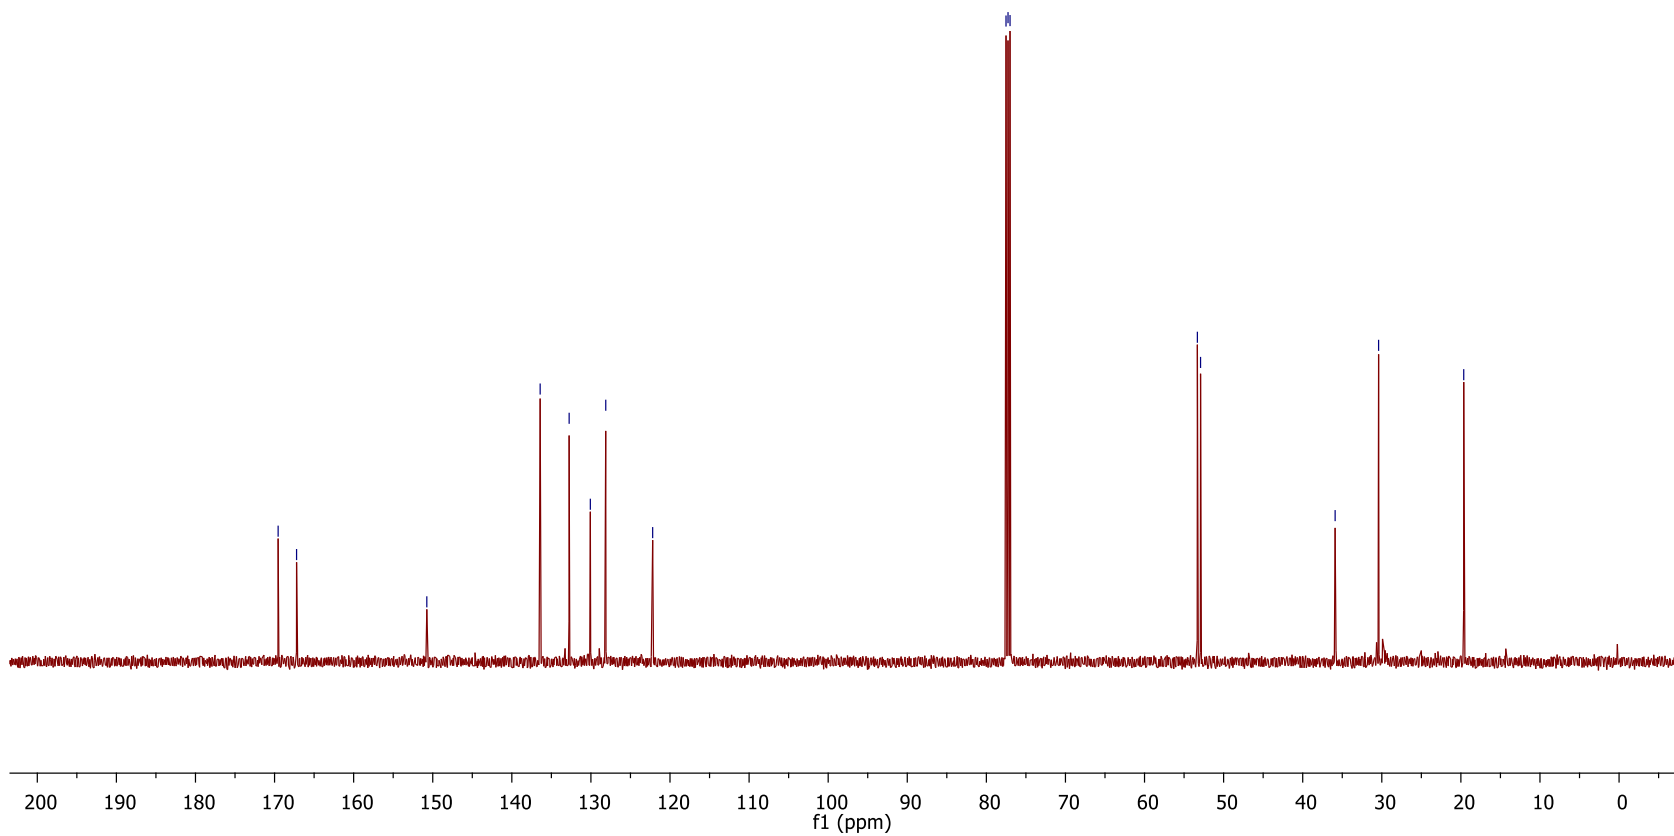

<sup>1</sup>H spectrum of compound **1c** (400 MHz, CDCl<sub>3</sub>)

CL-CP-SM-1H  
CL-CP-SM-1H

8.024 8.002 7.430 7.425 7.408 7.403 7.343 7.339 7.266 3.825 3.708 3.687 3.665 3.436 2.089 2.075 2.068 2.055 1.922 1.908 1.899 1.886

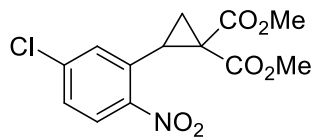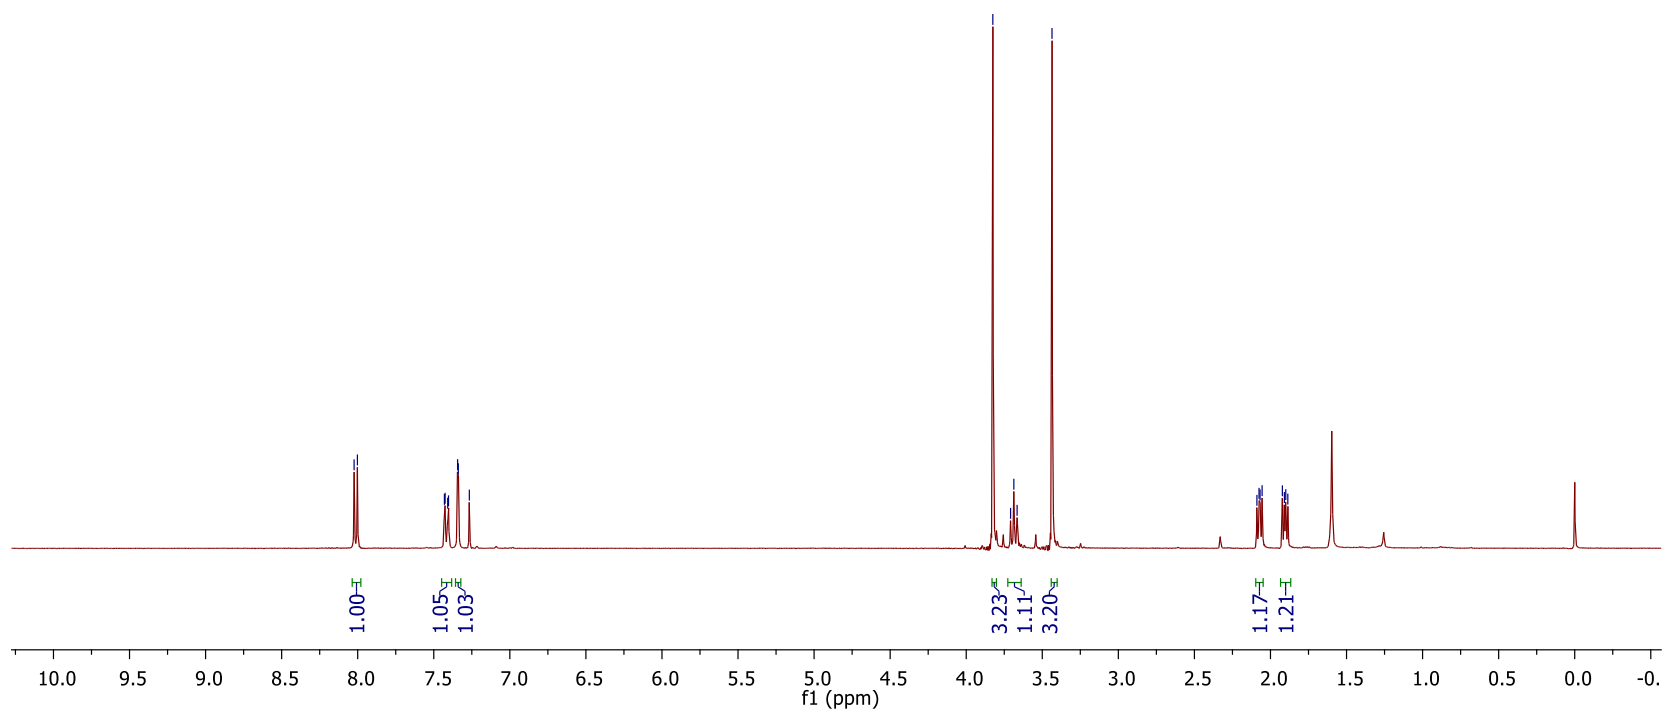

$^{13}\text{C}$  spectrum of compound **1c** (400 MHz,  $\text{CDCl}_3$ )

CL-CP-SM-13C  
CL-CP-SM-13C

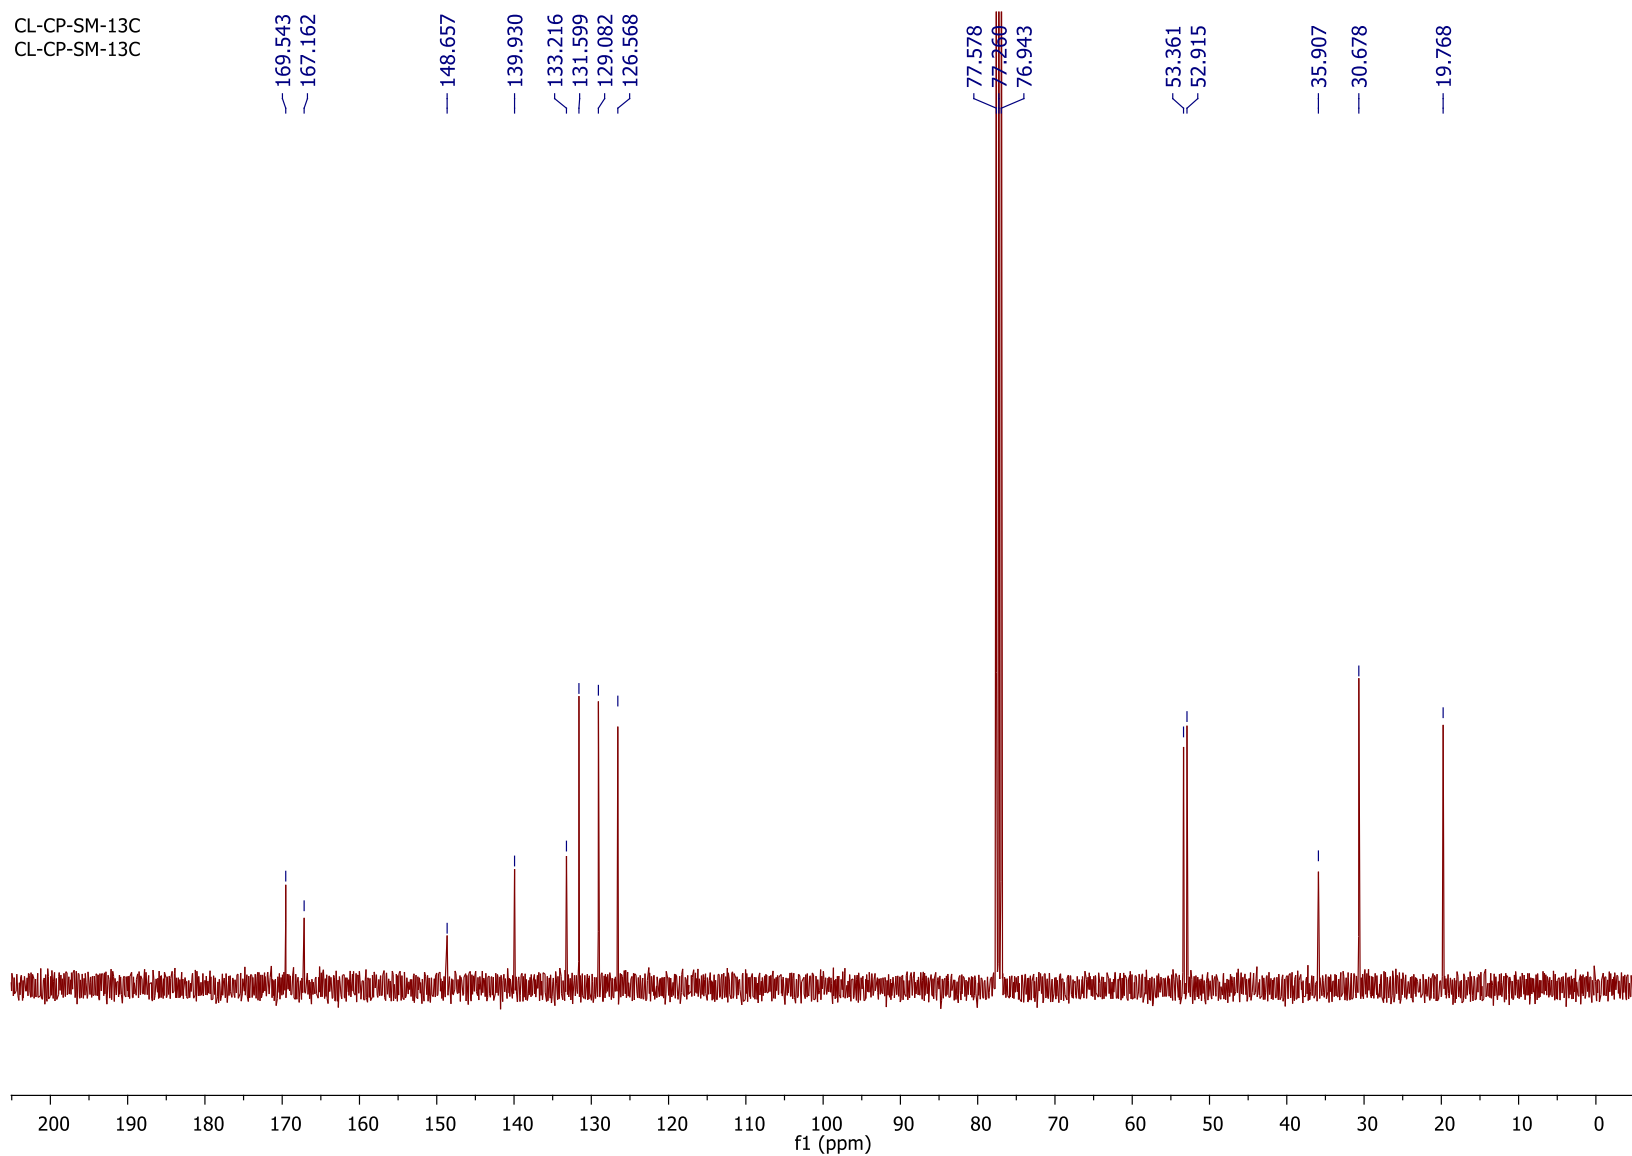

<sup>1</sup>H spectrum of compound **1d** (400 MHz, CDCl<sub>3</sub>)

OME-SM-1H  
OME-SM-1H

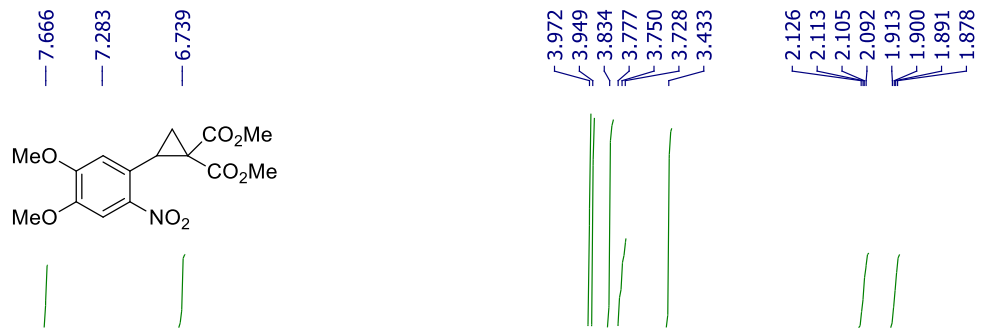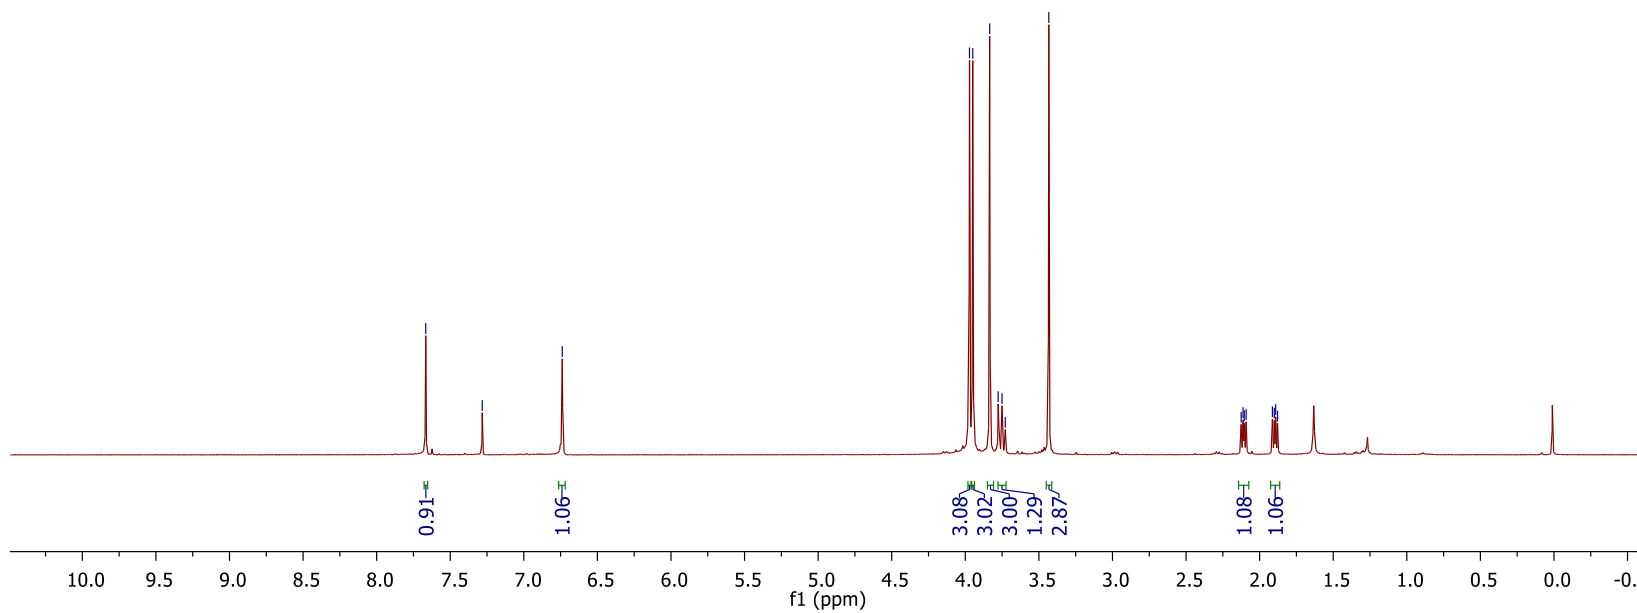

$^{13}\text{C}$  spectrum of compound **1d** (100 MHz,  $\text{CDCl}_3$ )

OME-SM-13C  
OME-SM-13C

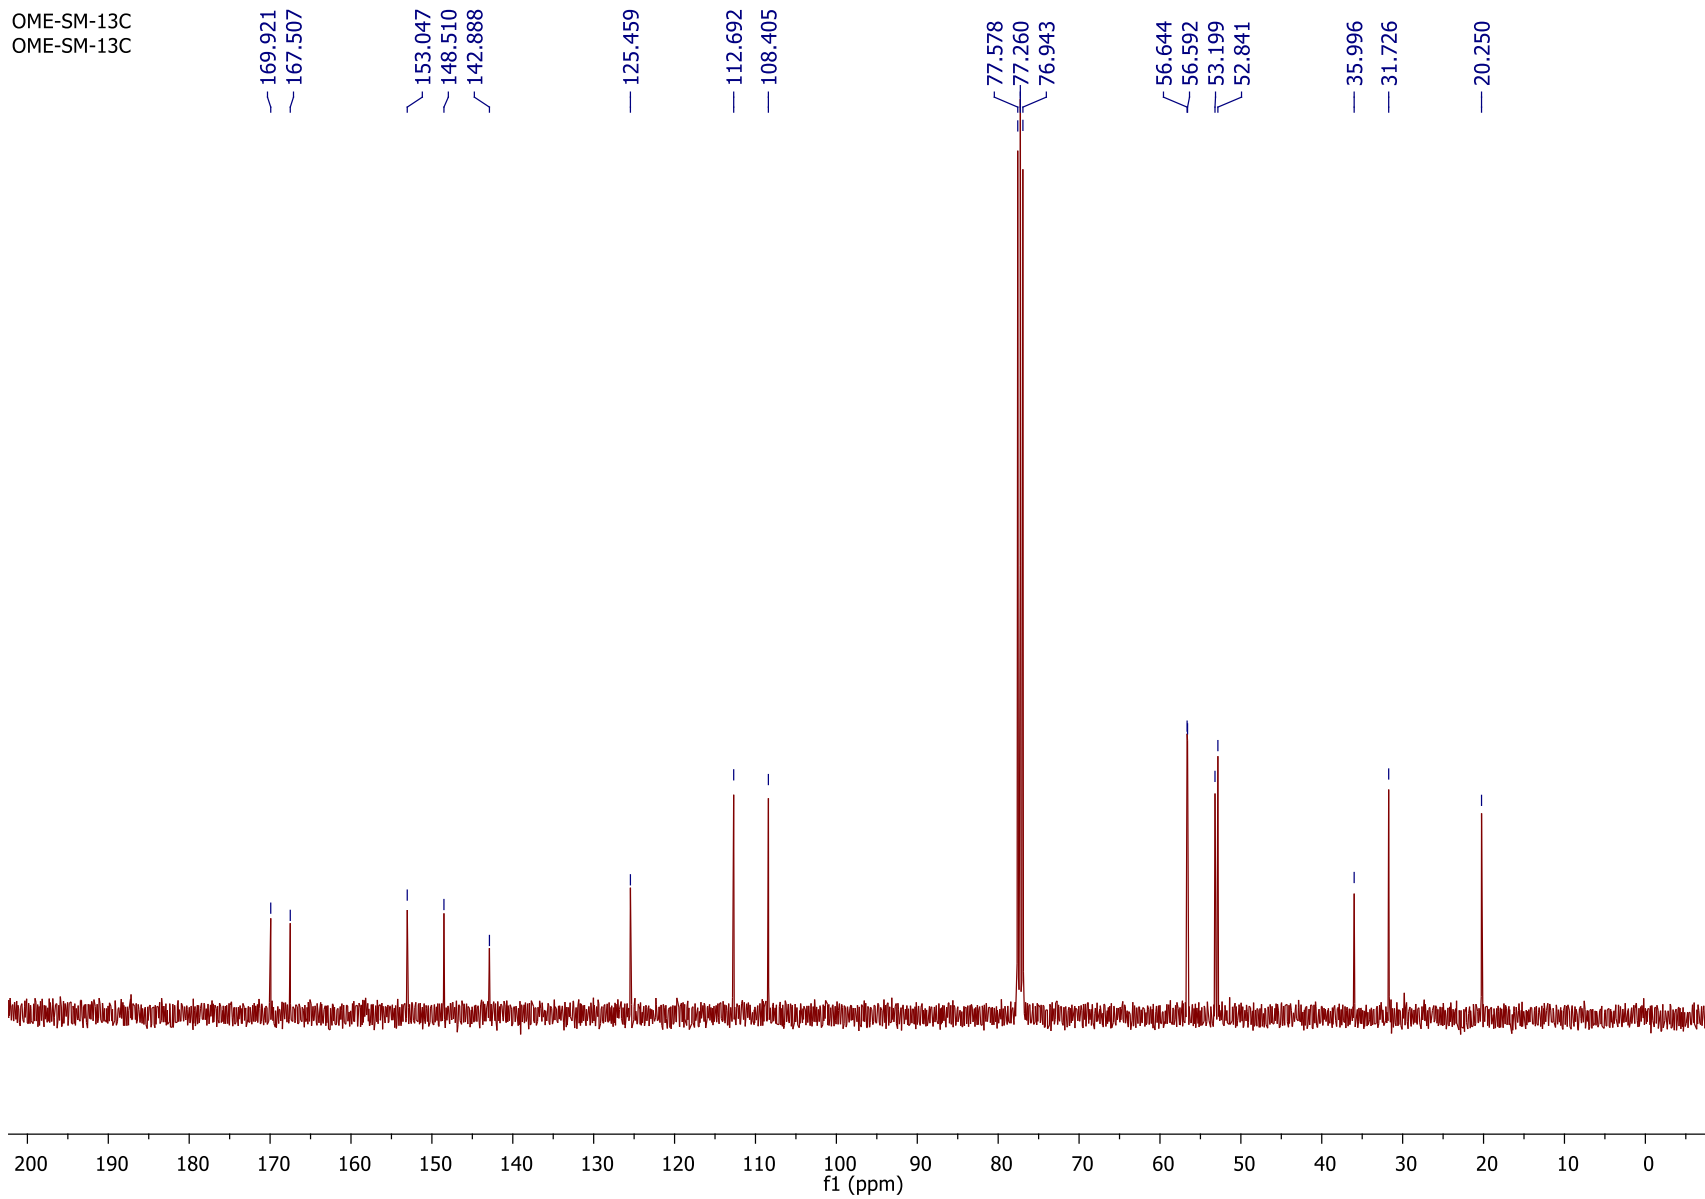



<sup>1</sup>H spectrum of compound **1e** (400 MHz, CDCl<sub>3</sub>)

OME-CP-SM-1H  
OME-CP-SM-1H

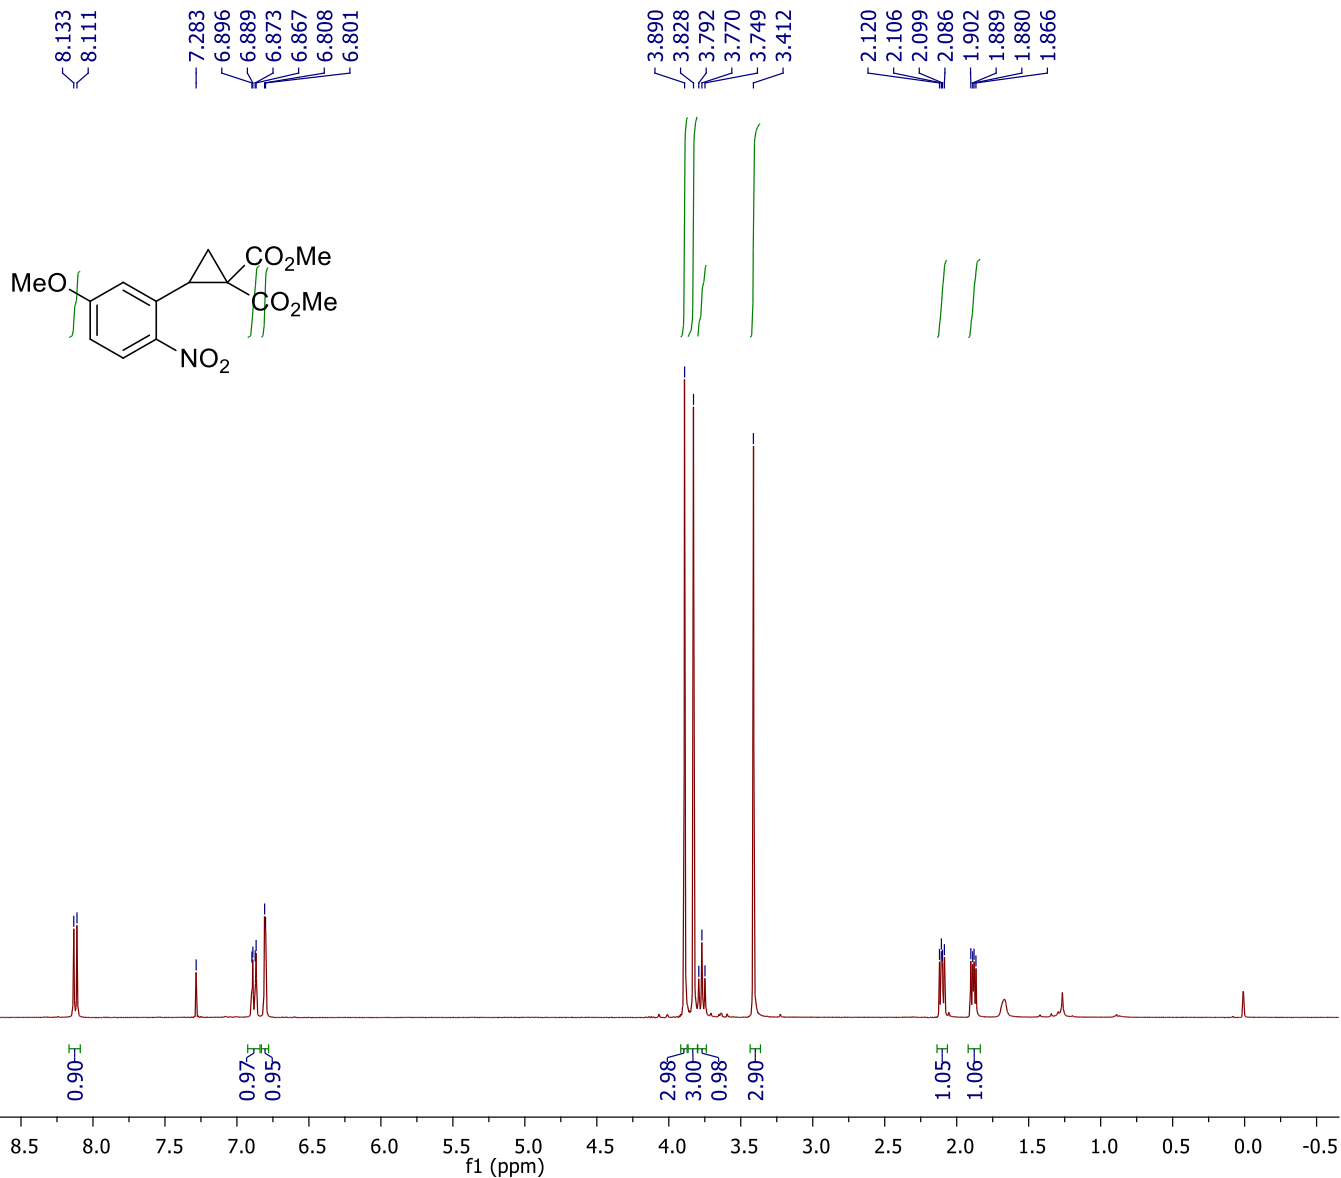

$^{13}\text{C}$  spectrum of compound **1e** (100 MHz,  $\text{CDCl}_3$ )

OME-CP-SM-13C  
OME-CP-SM-13C

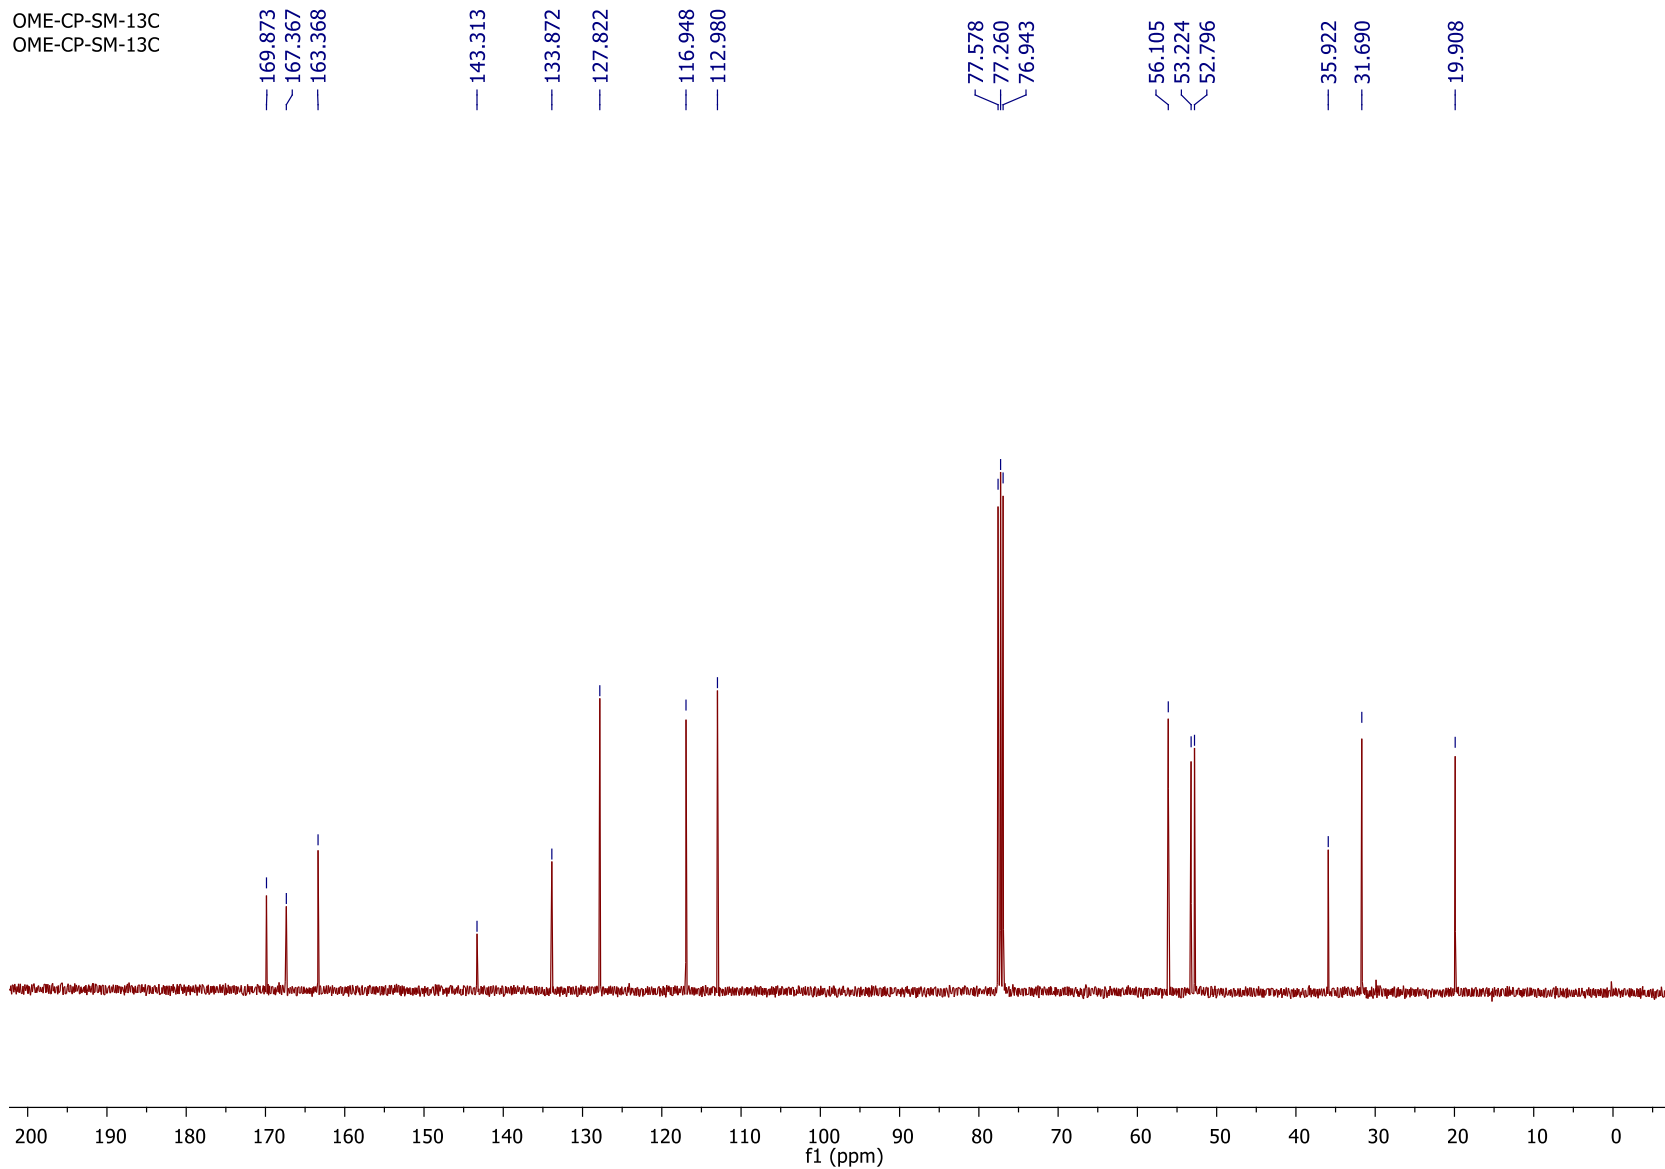

<sup>1</sup>H spectrum of compound **1f** (400 MHz, CDCl<sub>3</sub>)

DEM-CP-SM-1H  
DEM-CP-SM-1H

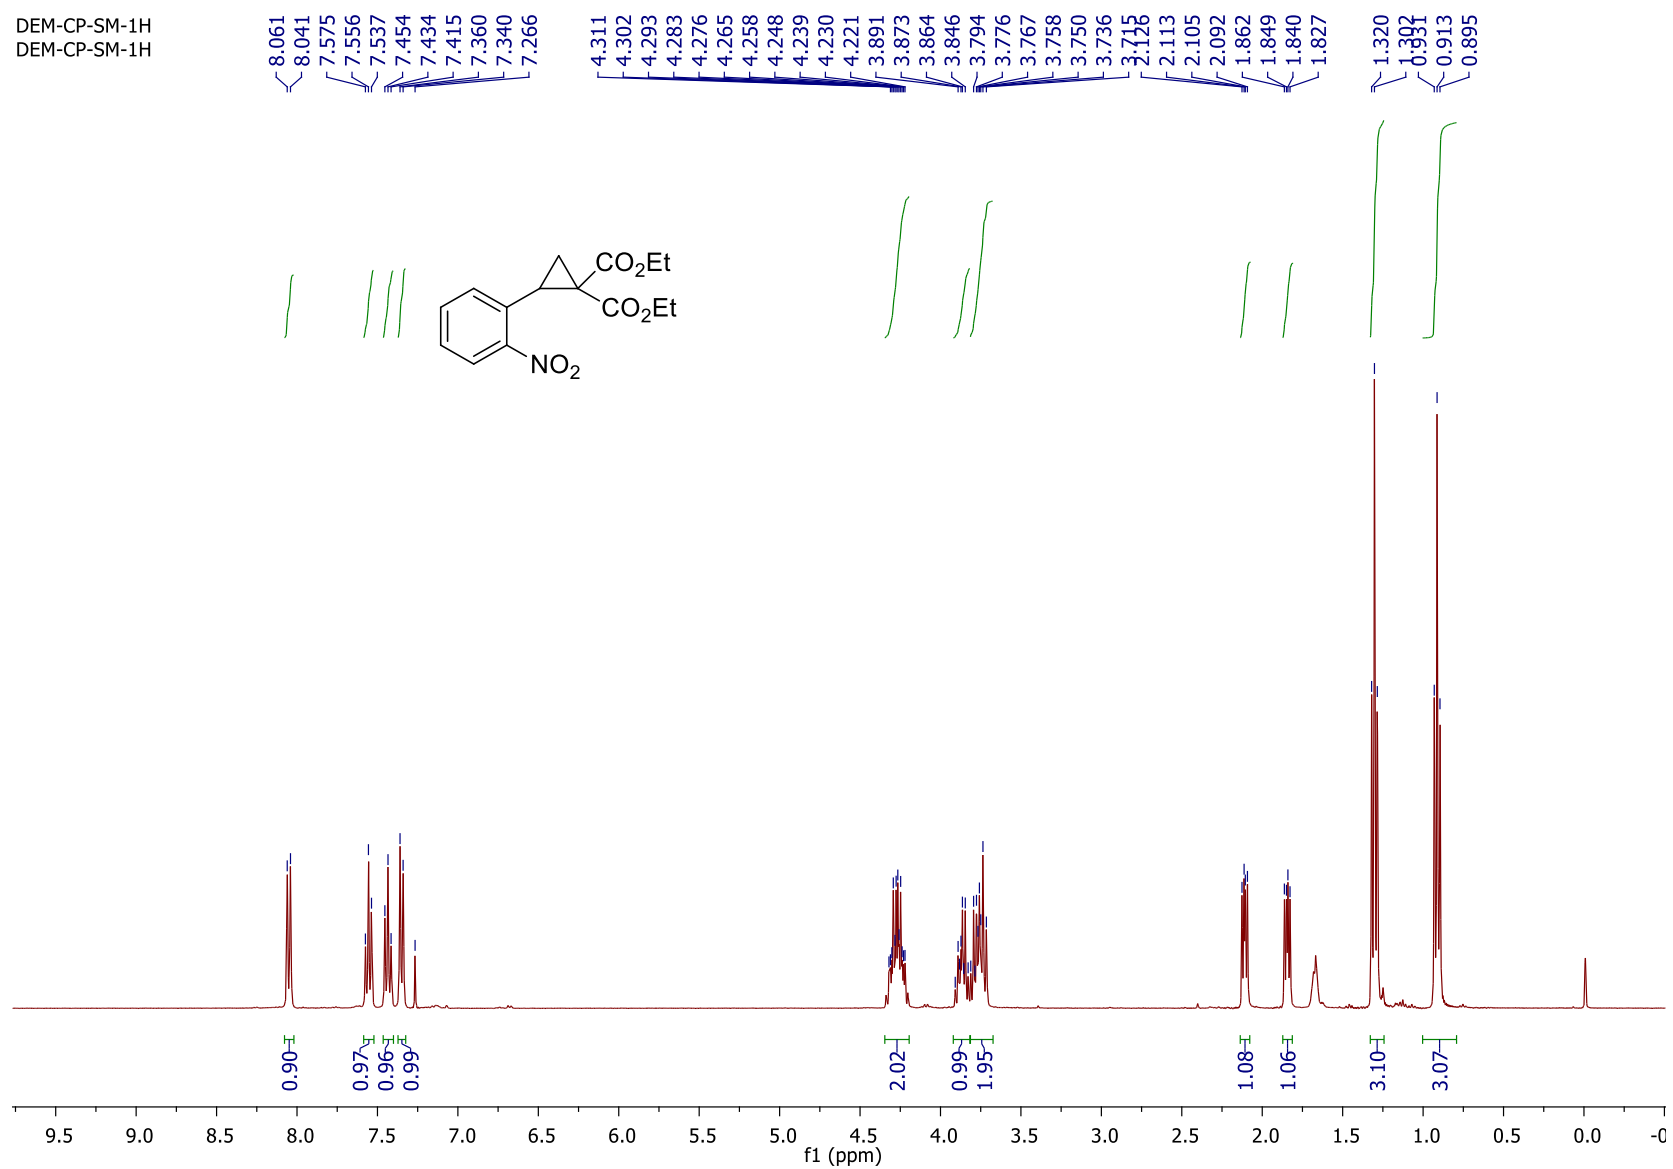

<sup>13</sup>C spectrum of compound **1f** (400 MHz, CDCl<sub>3</sub>)

DEM-CP-SM-13C  
DEM-CP-SM-13C

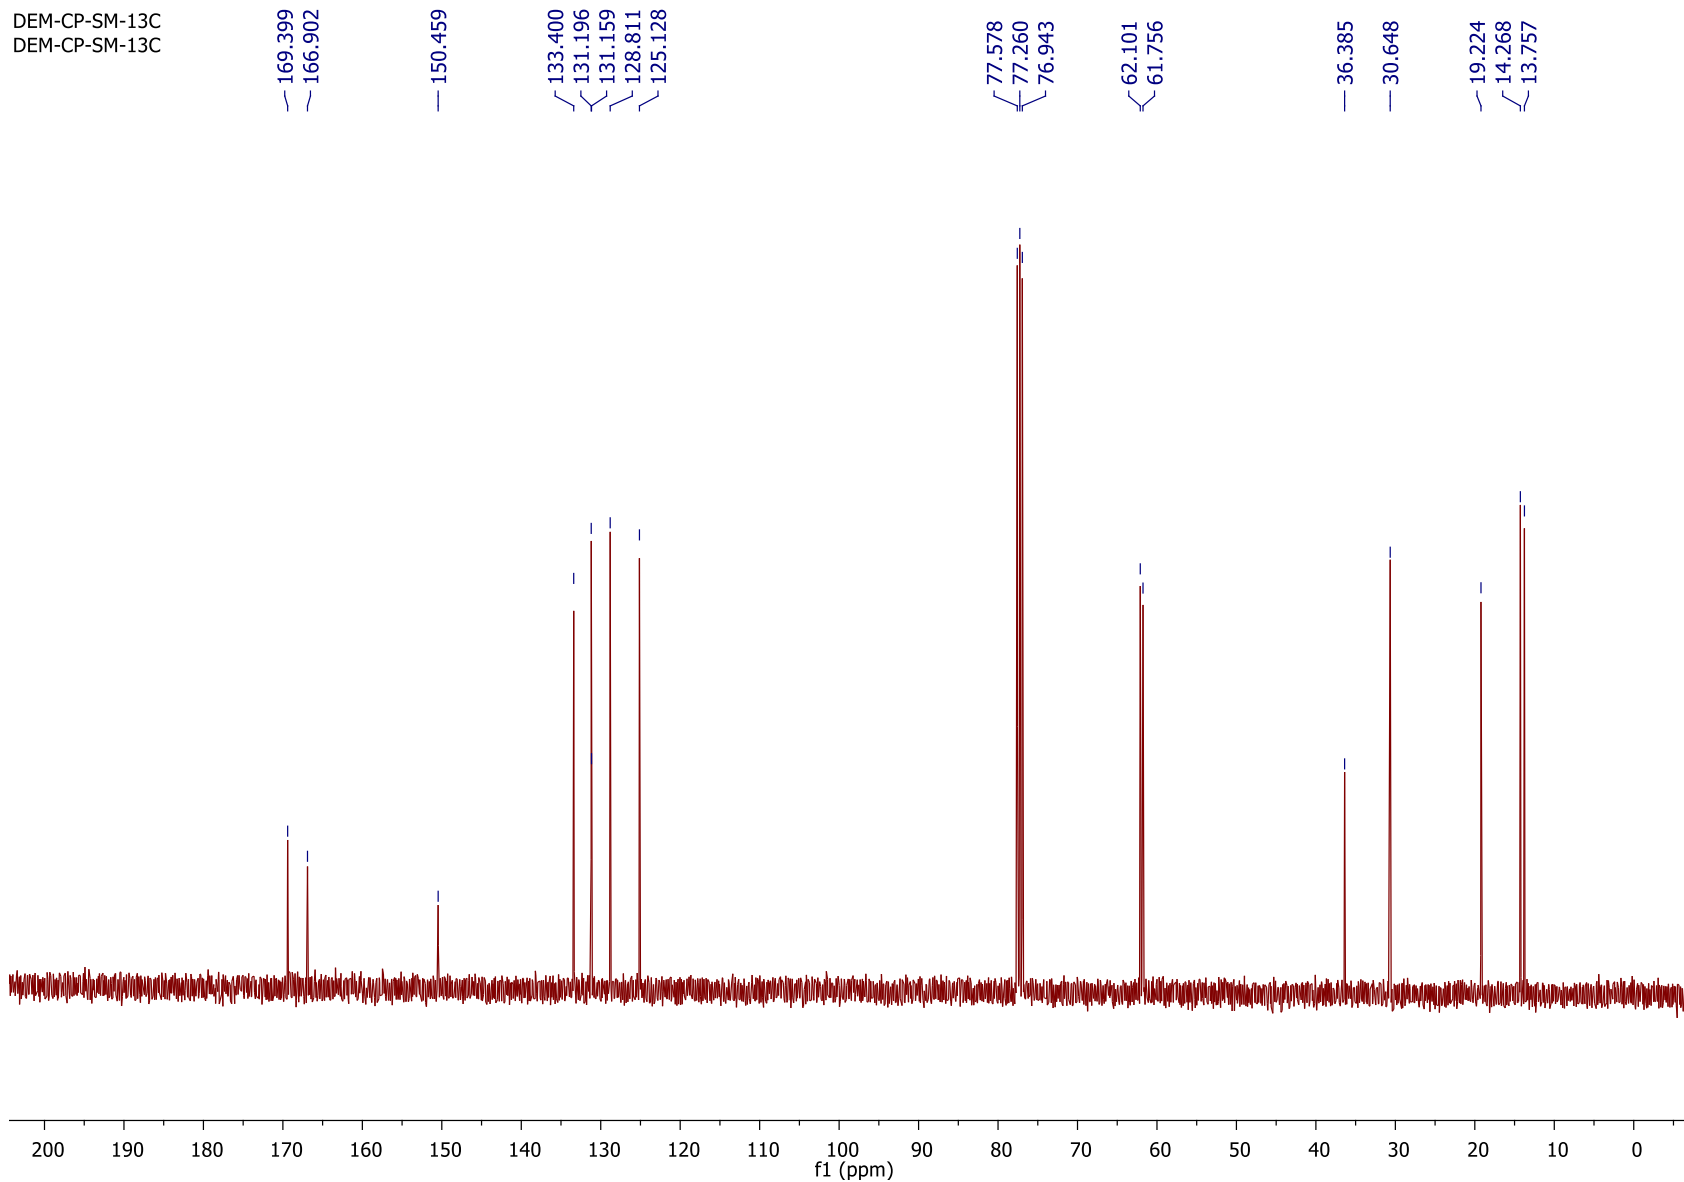

<sup>1</sup>H spectrum of compound **3aa'** (600 MHz, CDCl<sub>3</sub>)

Inter-1-600-1H  
1H

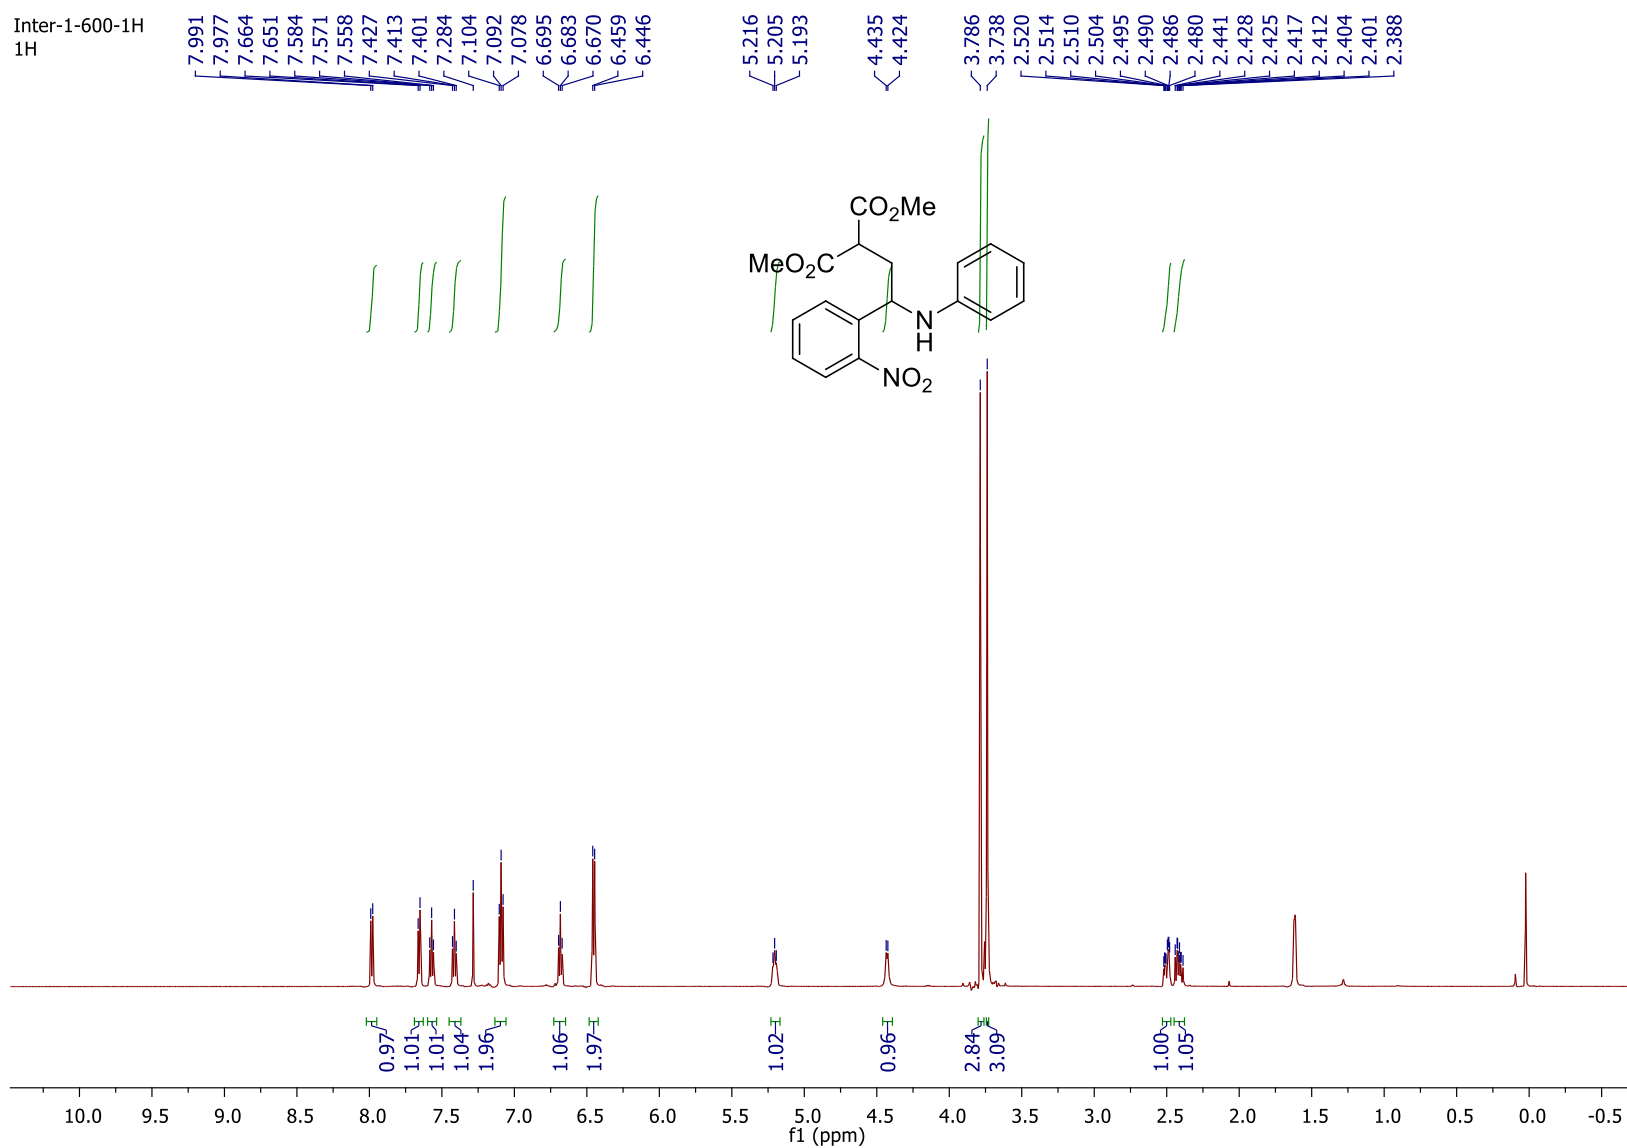

<sup>13</sup>C spectrum of compound **3aa'** (150 MHz, CDCl<sub>3</sub>)

Inter-1-600-13C  
13C

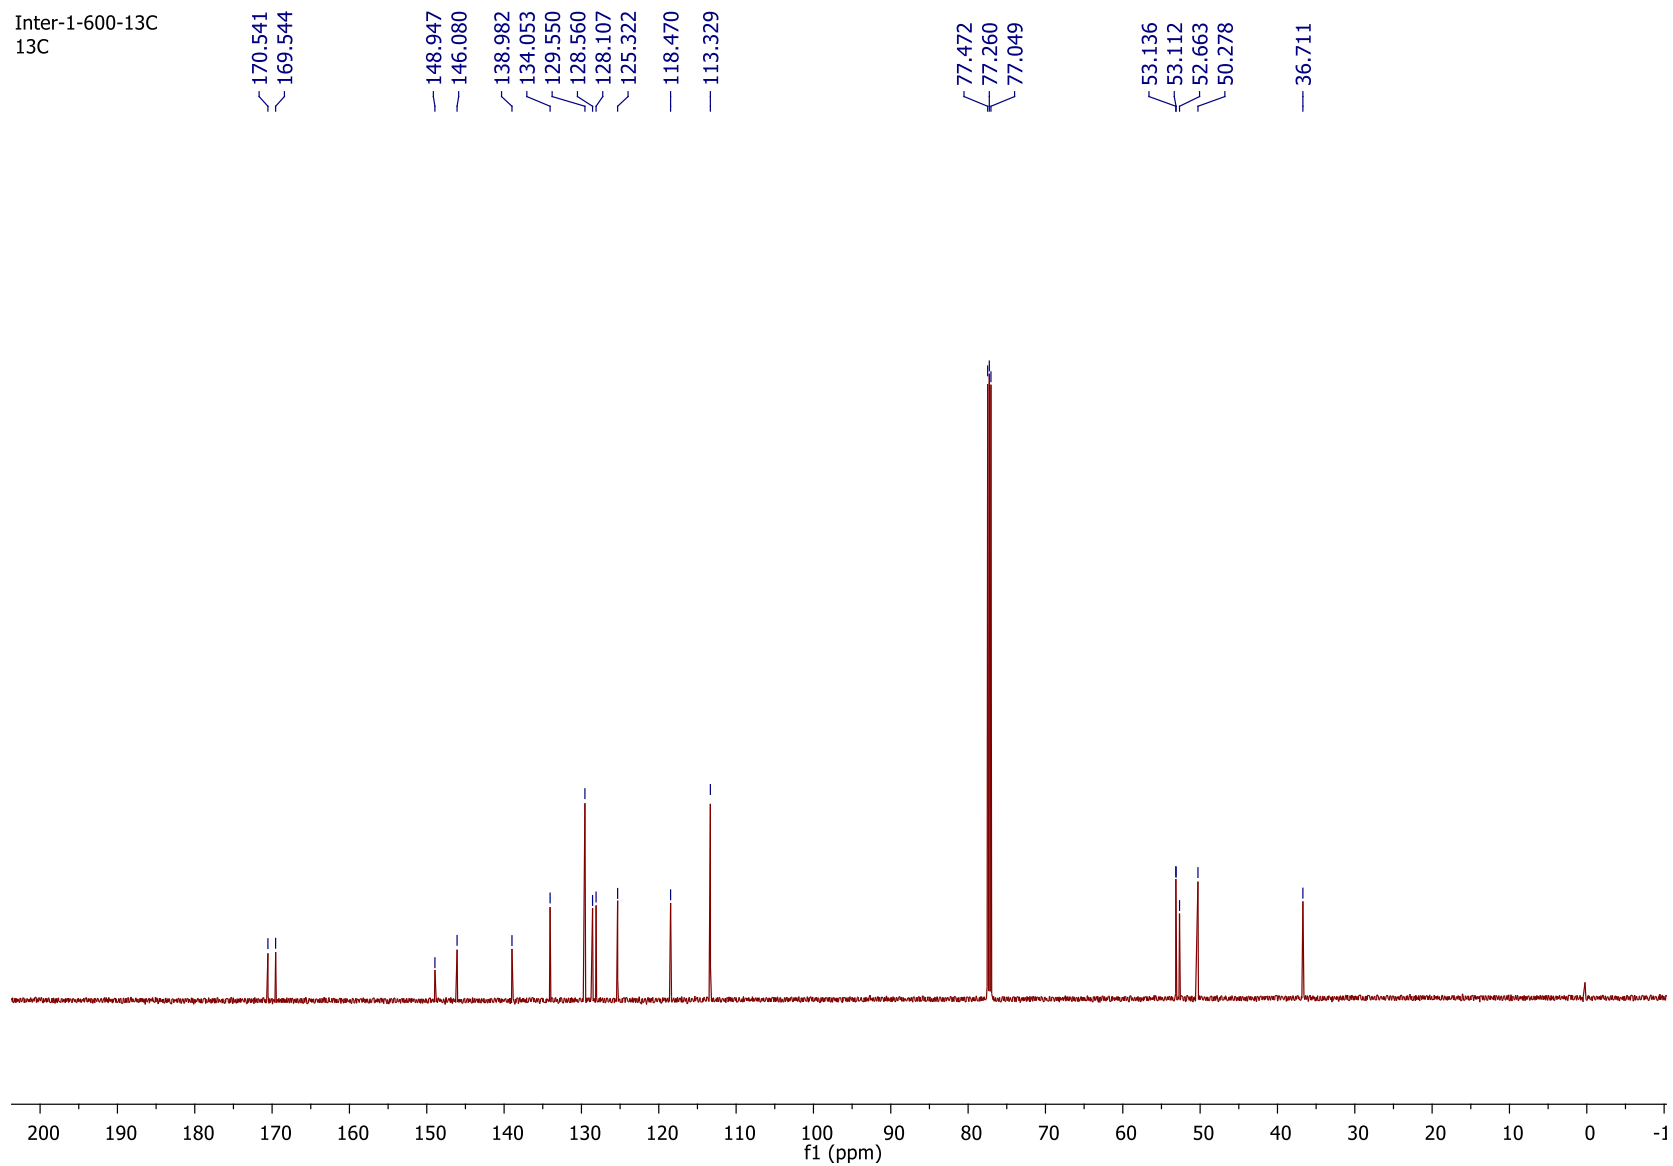

<sup>1</sup>H spectrum of compound **3aa** (500 MHz, CDCl<sub>3</sub>)

CP-PH-P-1H  
CP-PH-P-1H

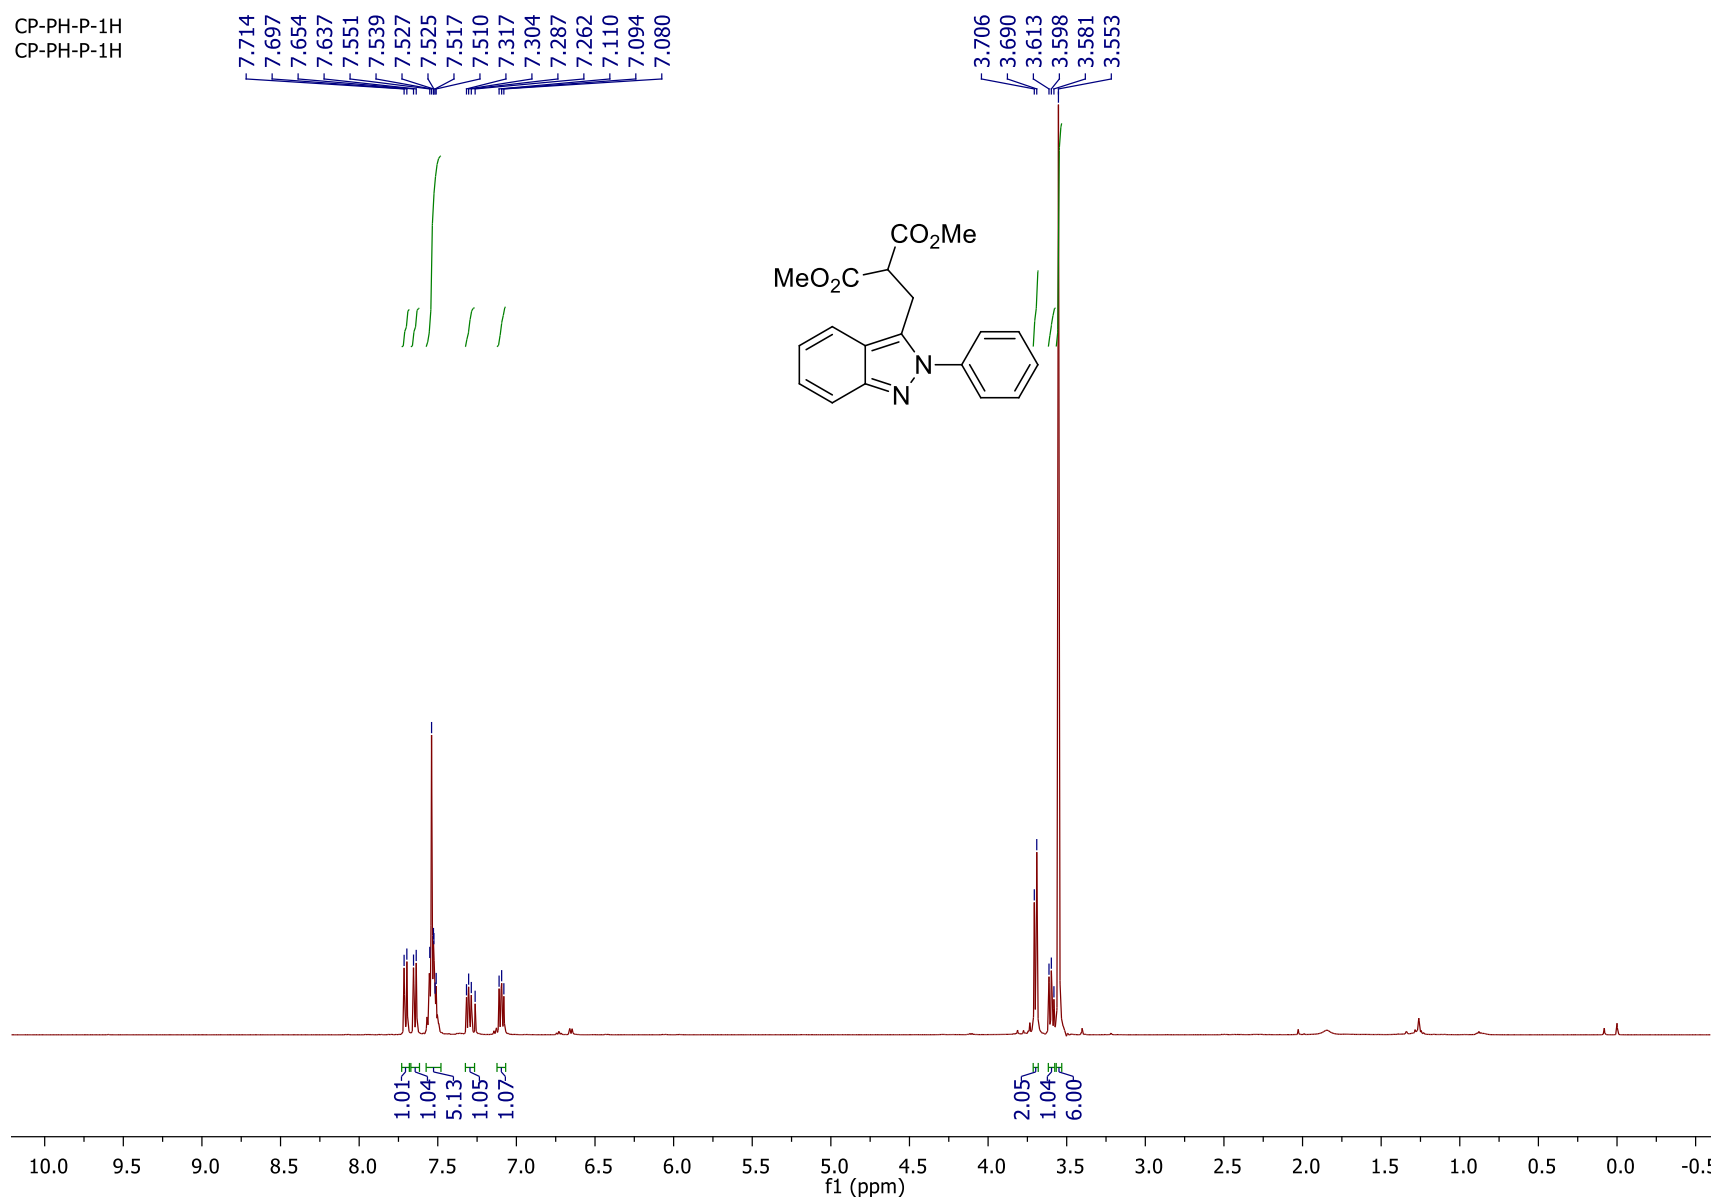

<sup>13</sup>C spectrum of compound **3aa** (125 MHz, CDCl<sub>3</sub>)

CP-PH-P-13C  
CP-PH-P-13C

— 168.530

— 148.810

— 139.861

— 131.749

— 129.589

— 129.512

— 126.927

— 126.458

— 121.968

— 121.565

— 119.975

— 117.958

— 77.514

— 77.260

— 77.005

— 52.894

— 50.897

— 24.663

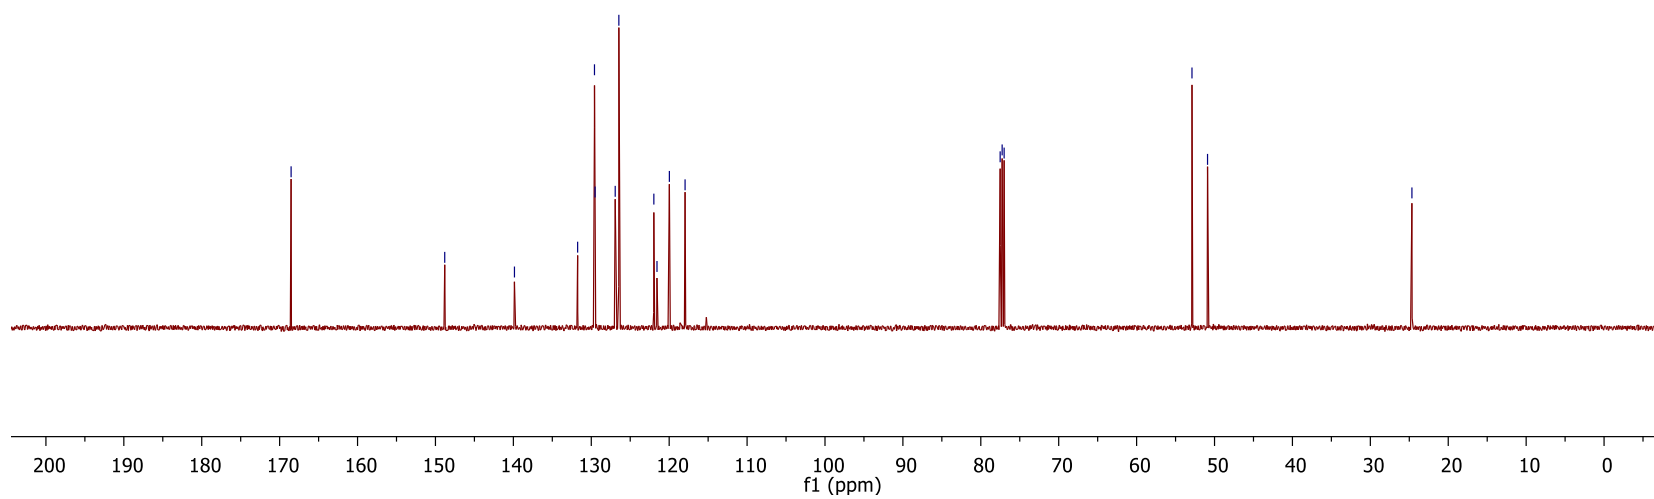



<sup>1</sup>H spectrum of compound **3ab** (400 MHz, CDCl<sub>3</sub>)

cpdmm-pme-p-1H  
cpdmm-pme-p-1H

7.725  
7.703  
7.662  
7.641  
7.432  
7.411  
7.365  
7.344  
7.328  
7.311  
7.290  
7.120  
7.102  
7.100  
7.082

3.754  
3.706  
3.687  
3.634  
3.616  
3.612  
3.594  
3.571

2.467

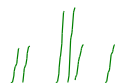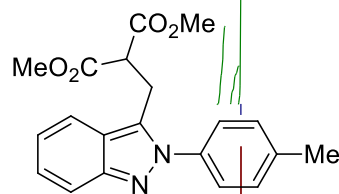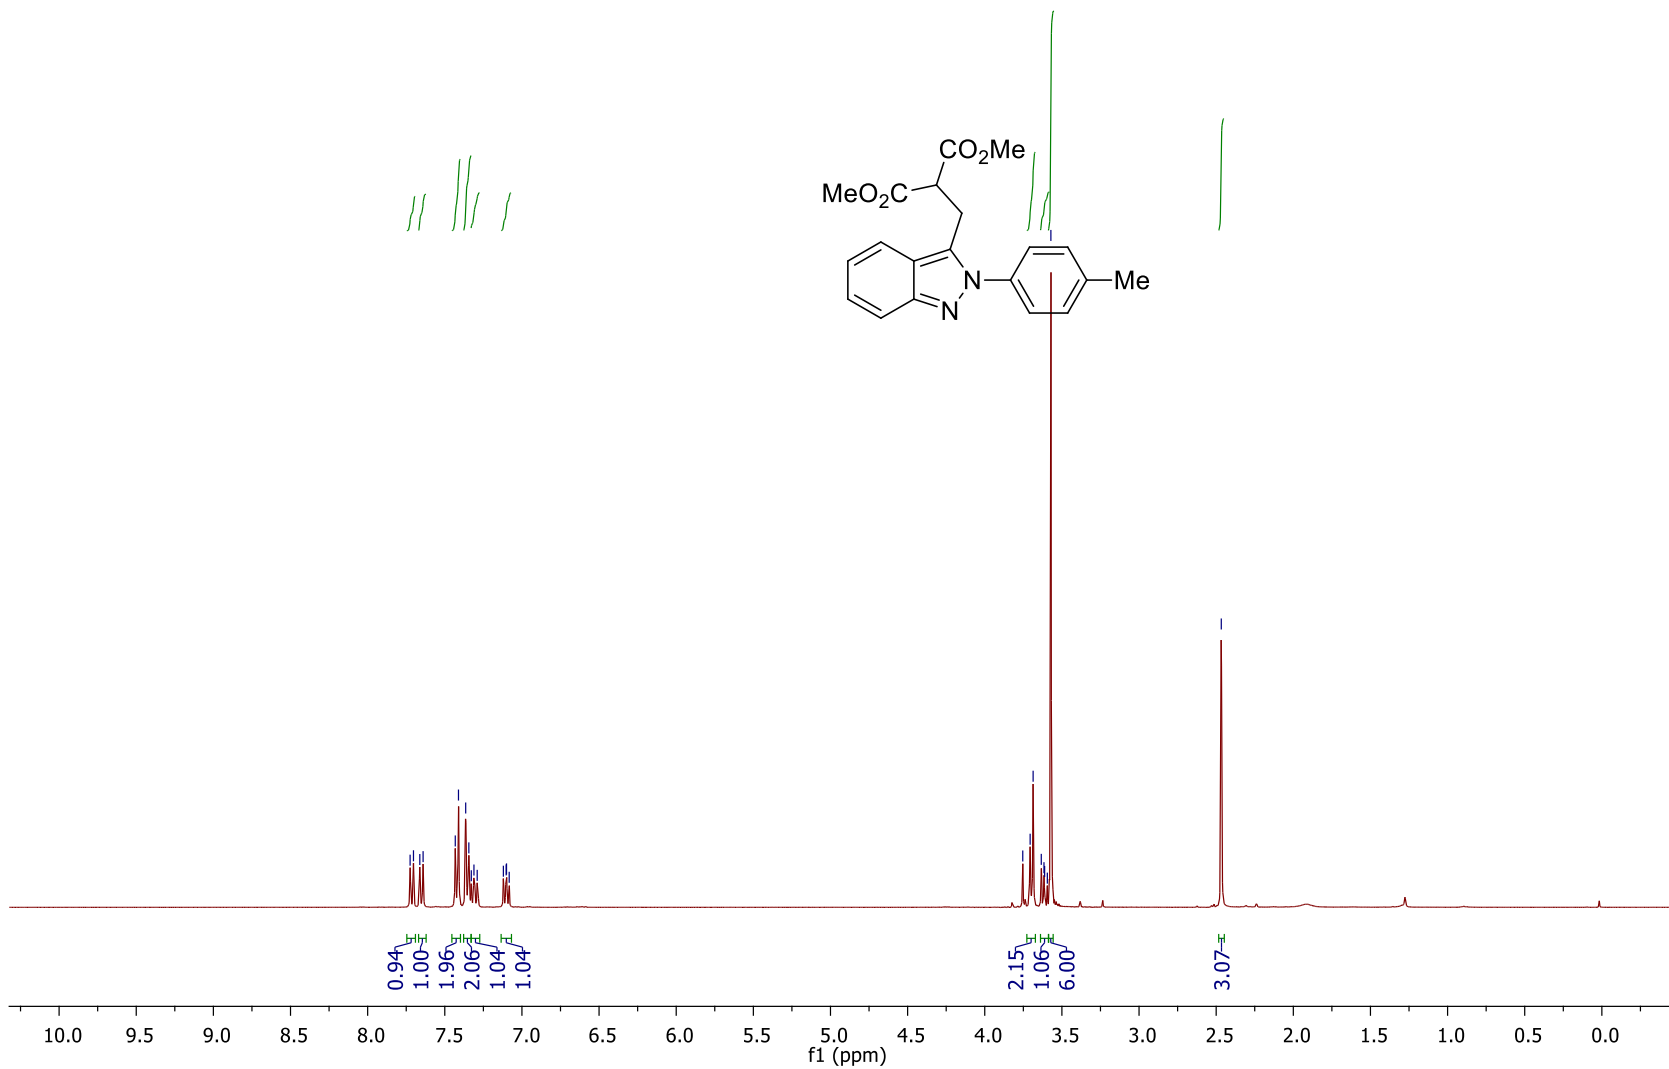

<sup>13</sup>C spectrum of compound **3ab** (100 MHz, CDCl<sub>3</sub>)

cpdmm-pme-p--13C  
cpdmm-pme-p--13C

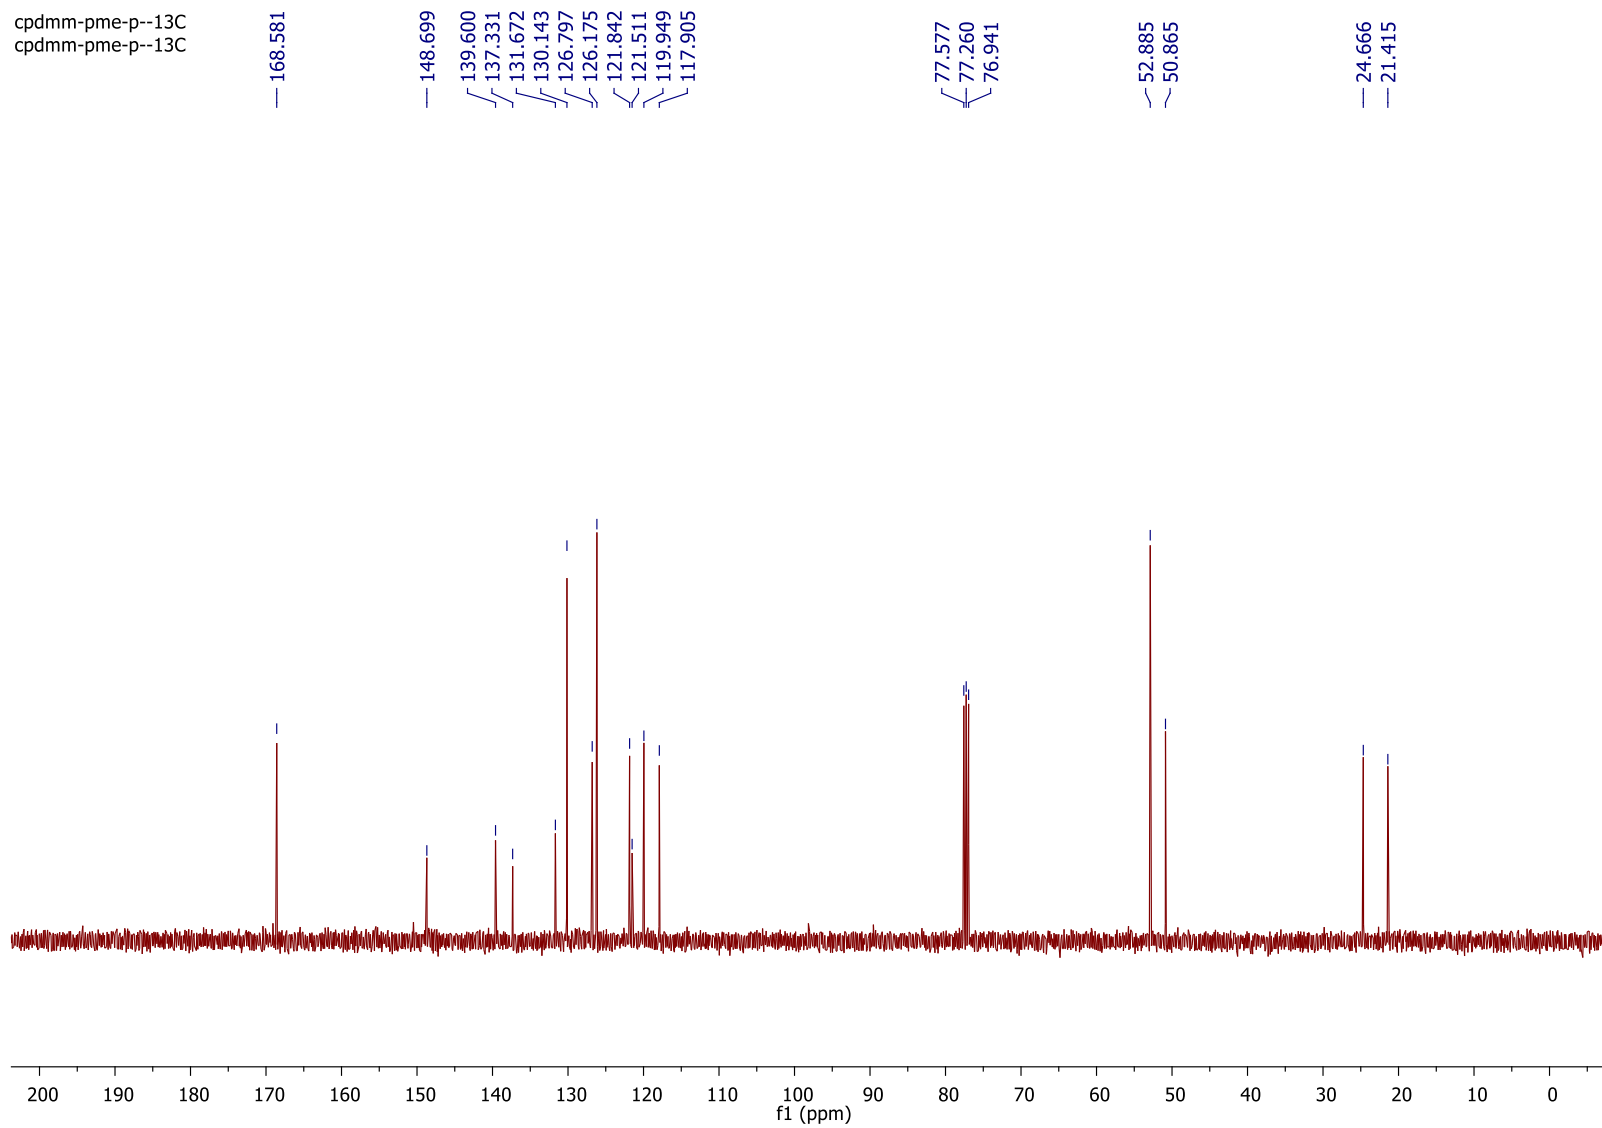

<sup>1</sup>H spectrum of compound 3ac (500 MHz, CDCl<sub>3</sub>)

DMM-ET-1H  
DMM-ET-1H

7.706  
7.688  
7.647  
7.630  
7.440  
7.423  
7.375  
7.358  
7.312  
7.297  
7.282  
7.259  
7.105  
7.090  
7.075

3.696  
3.680  
3.628  
3.613  
3.596  
3.565  
2.782  
2.766  
2.751  
2.736

1.318  
1.303  
1.288

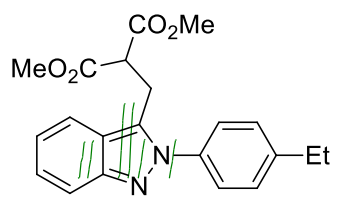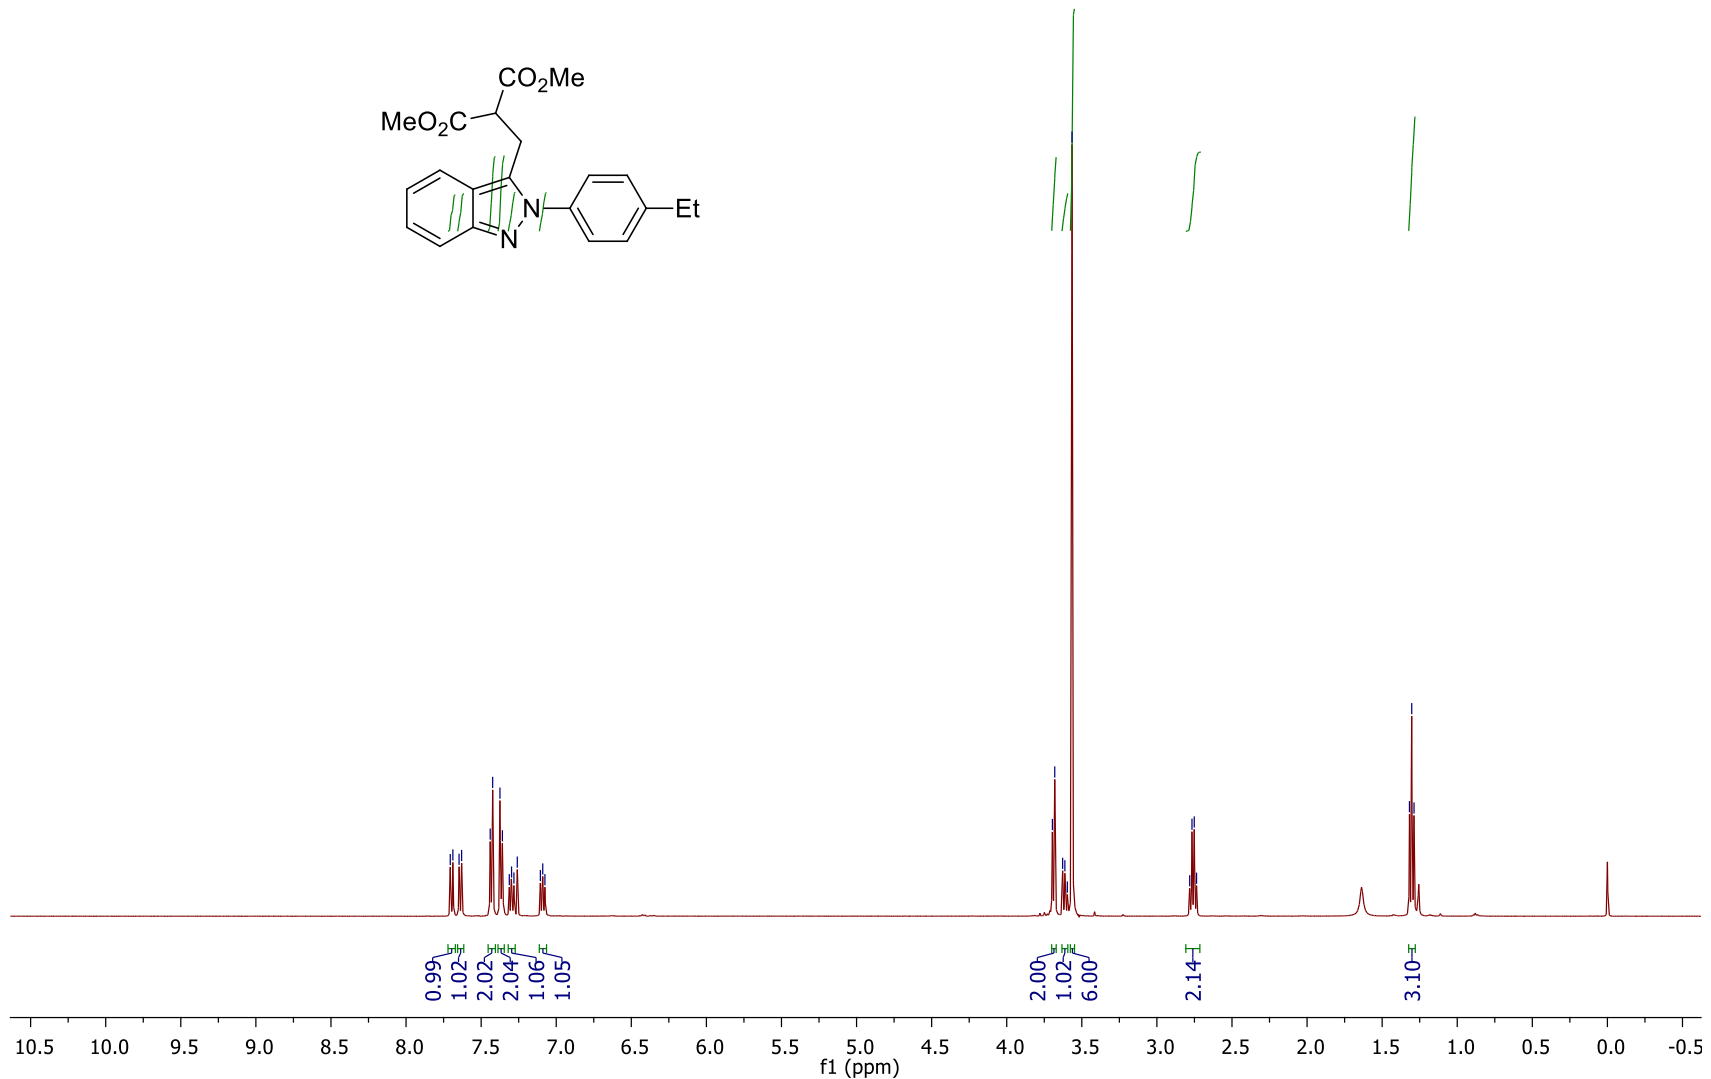

<sup>13</sup>C spectrum of compound **3ac** (100 MHz, CDCl<sub>3</sub>)

DMM-ET-13C  
DMM-ET-13C

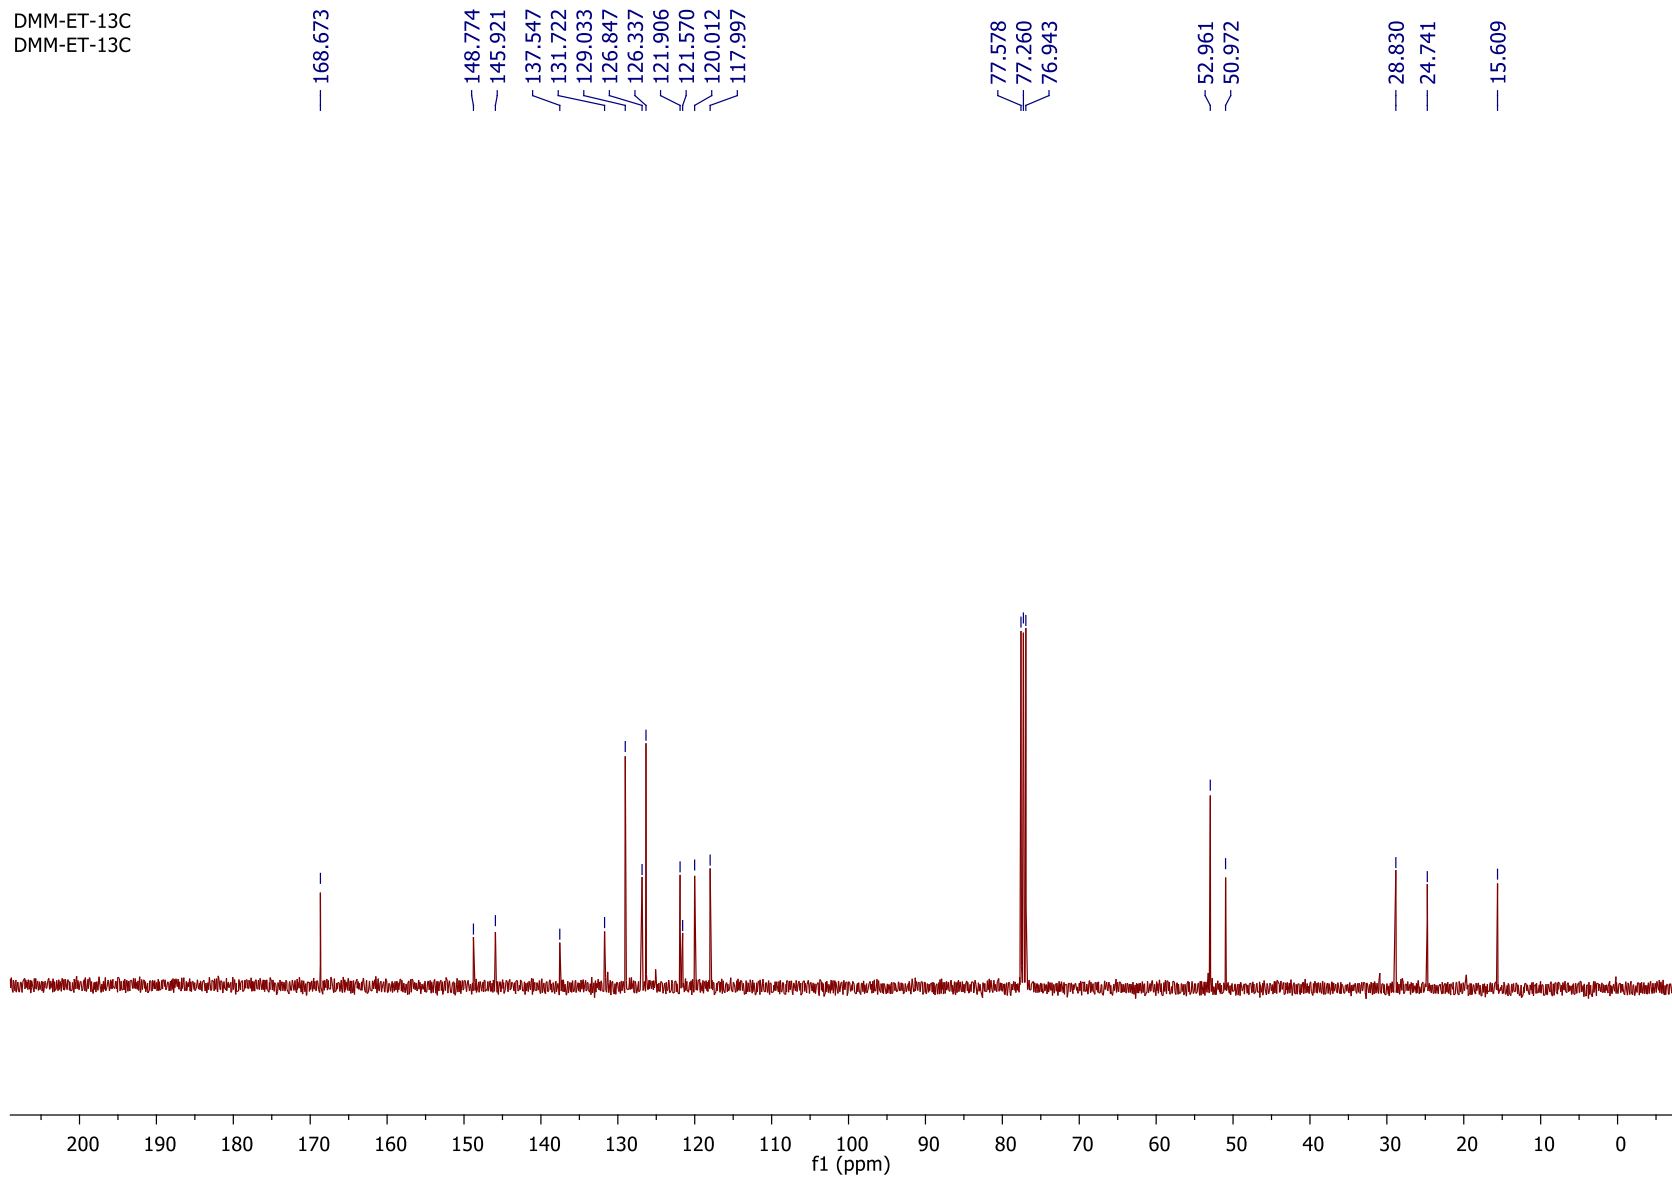

<sup>1</sup>H spectrum of compound **3ad** (400 MHz, CDCl<sub>3</sub>)

CPDMM-PBU-1H  
CPDMM-PBU-1H

7.727  
7.705  
7.670  
7.649  
7.452  
7.432  
7.376  
7.355  
7.334  
7.317  
7.296  
7.283  
7.127  
7.106  
7.089

3.718  
3.699  
3.641  
3.624  
3.621  
3.602  
3.579  
2.753  
2.734  
2.714  
1.700  
1.681  
1.662  
1.437  
1.419  
1.400  
0.991  
0.972  
0.954

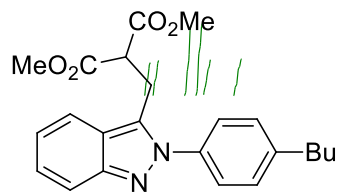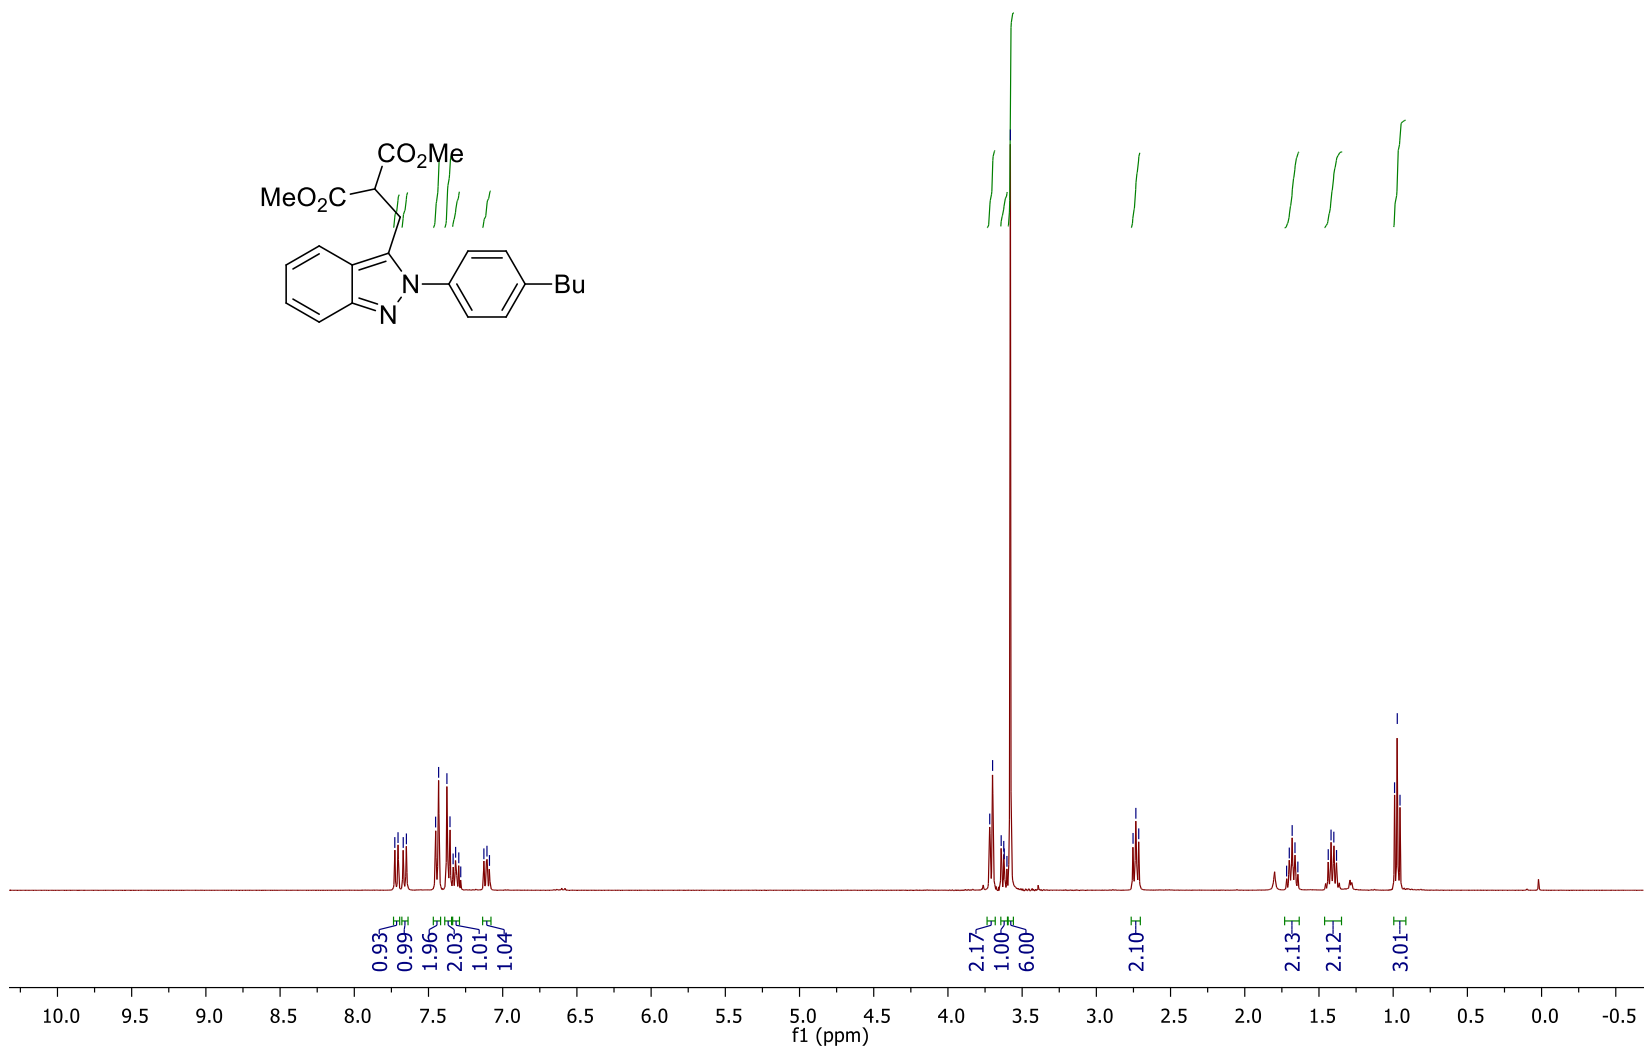

<sup>13</sup>C spectrum of compound **3ad** (100 MHz, CDCl<sub>3</sub>)

cpdmm-P-BU--13C  
cpdmm-P-BU--13C

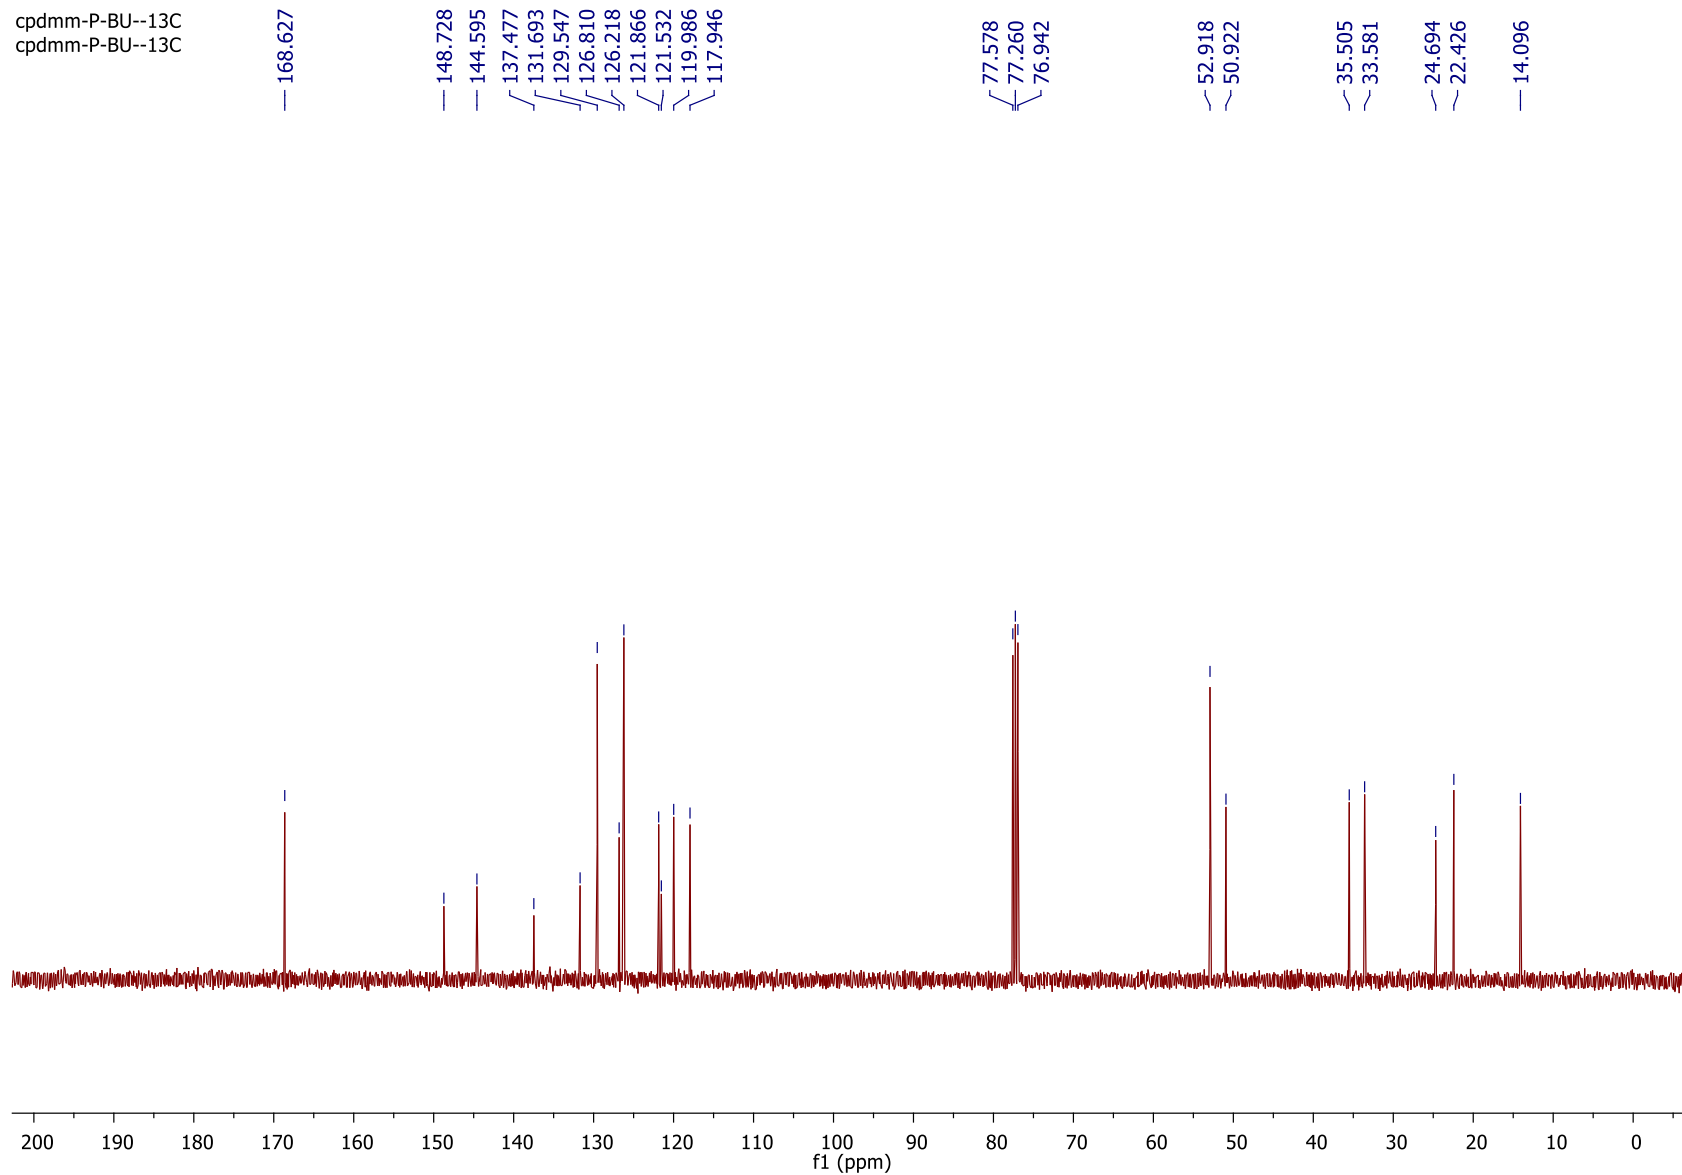

<sup>1</sup>H spectrum of compound **3ae** (400 MHz, CDCl<sub>3</sub>)

CPDMM-P-tBU-1H  
CPDMM-P-tBU-1H

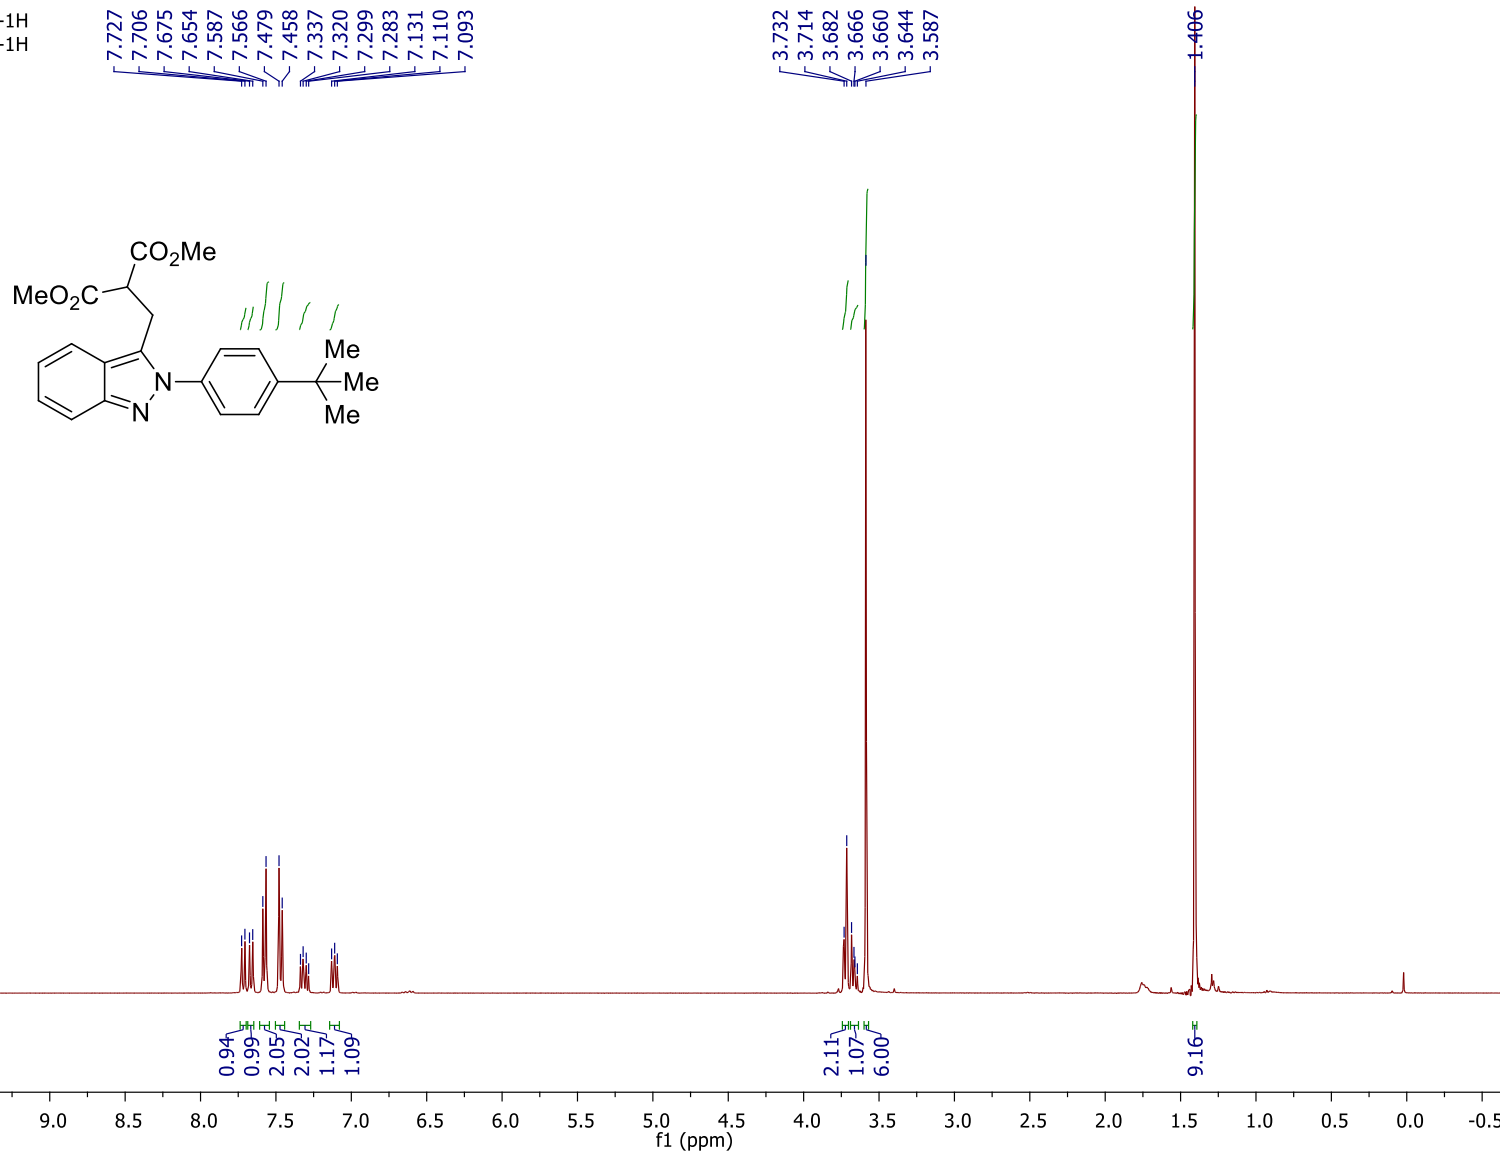

<sup>13</sup>C spectrum of compound **3ae** (100 MHz, CDCl<sub>3</sub>)

cpdmm-P-tBU--13C  
cpdmm-P-tBU--13C

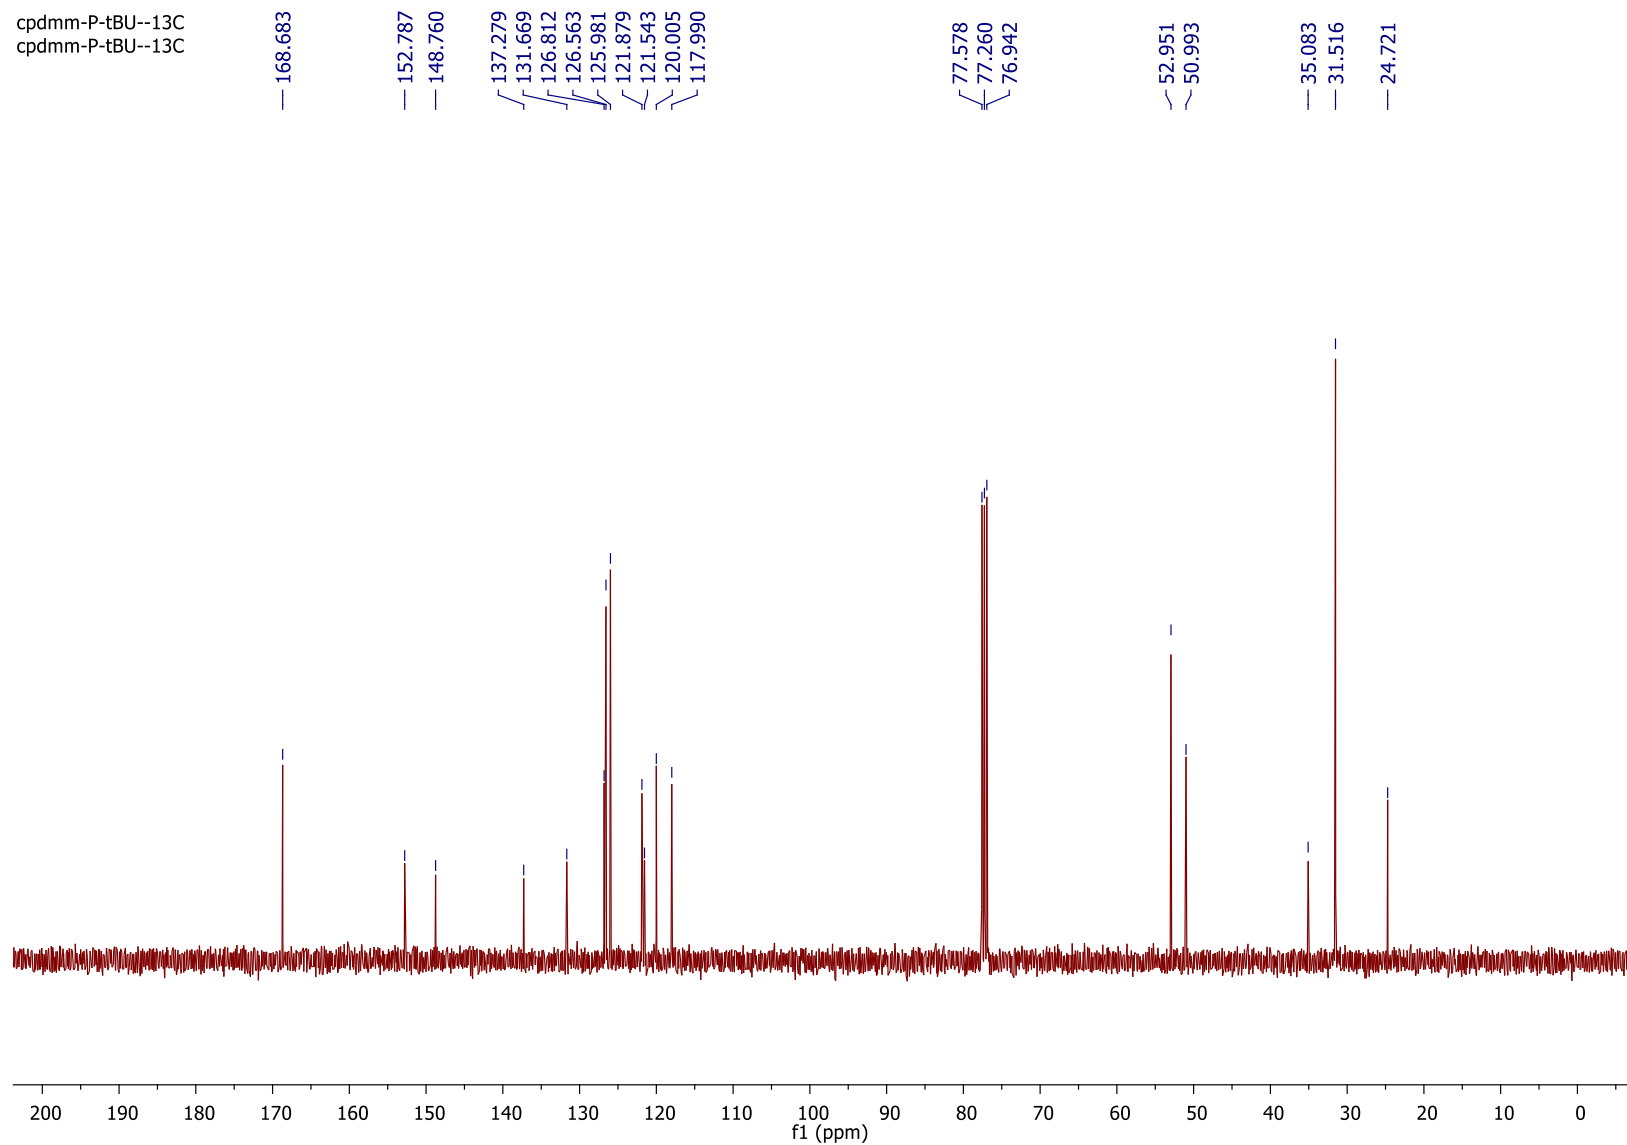



<sup>1</sup>H spectrum of compound **3af** (400 MHz, CDCl<sub>3</sub>)

cpdmm-pome-p-1H  
cpdmm-pome-p-1H

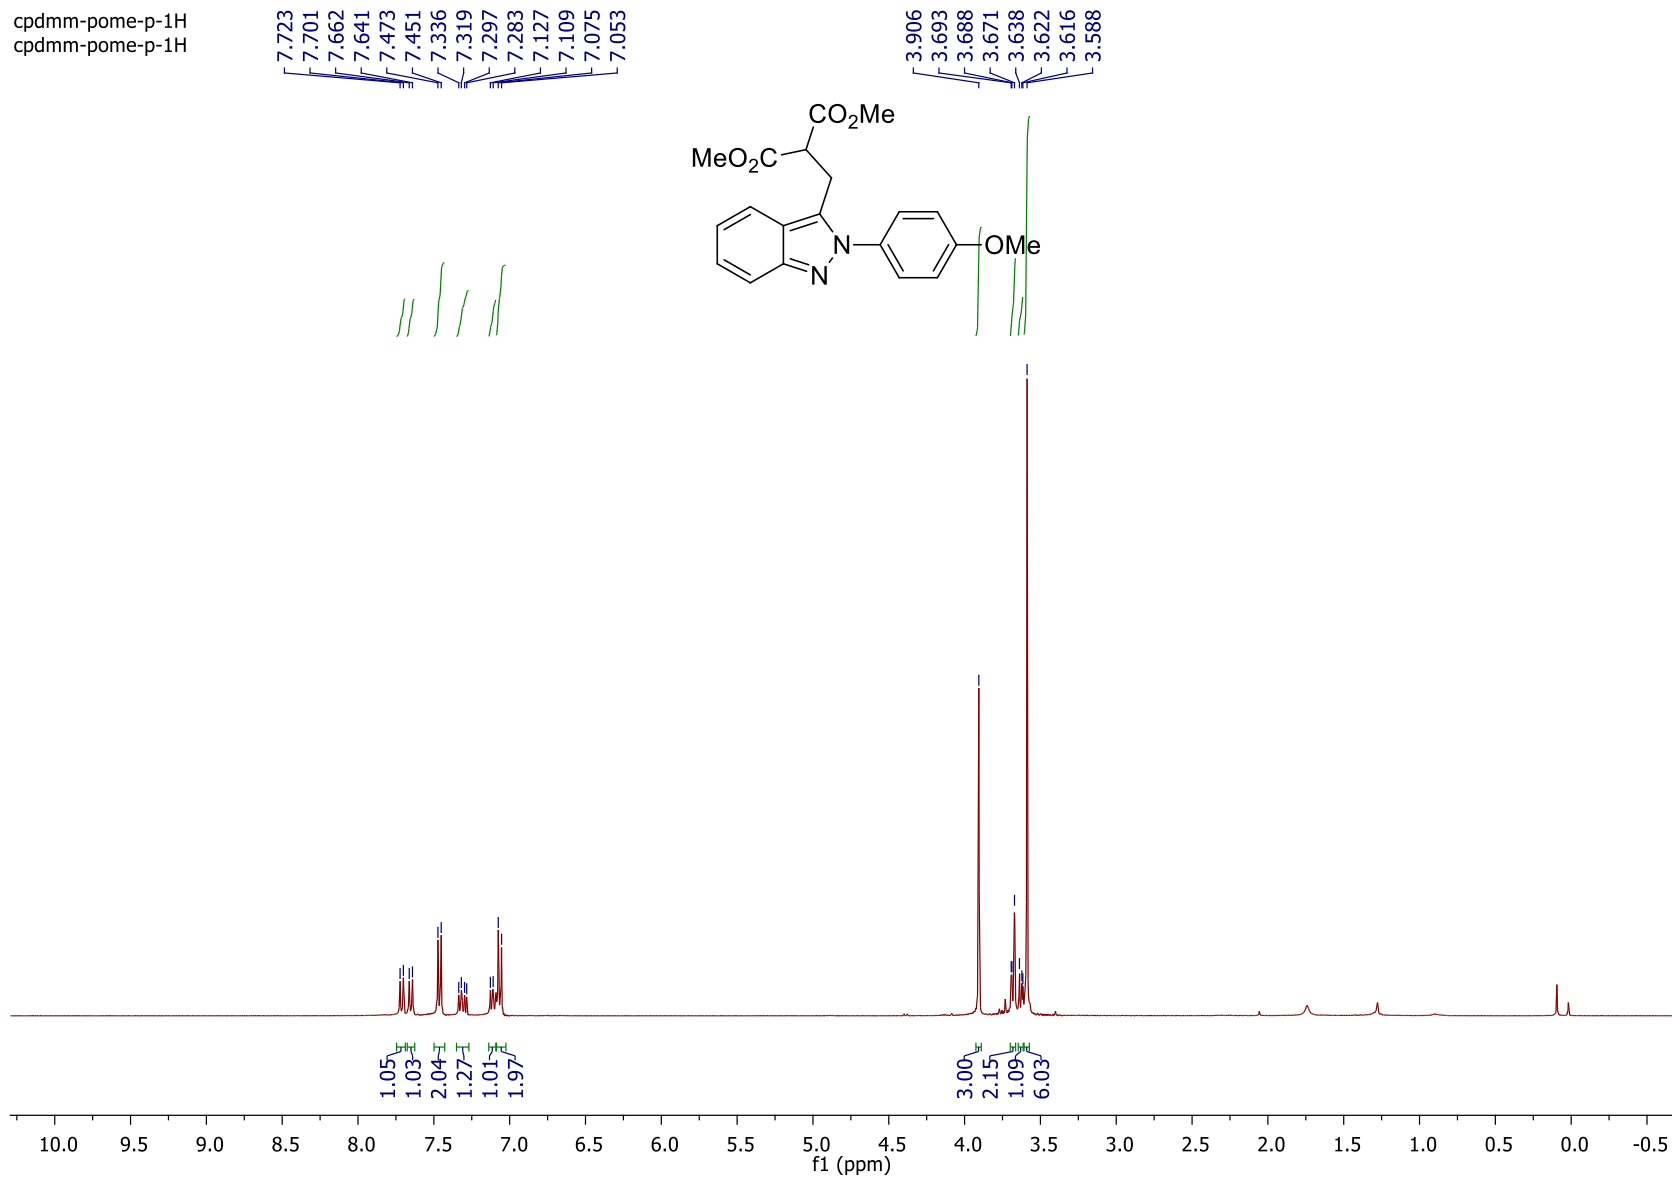

<sup>13</sup>C spectrum of compound **3af** (100 MHz, CDCl<sub>3</sub>)

cpdmm-pome-p--13C  
cpdmm-pome-p--13C

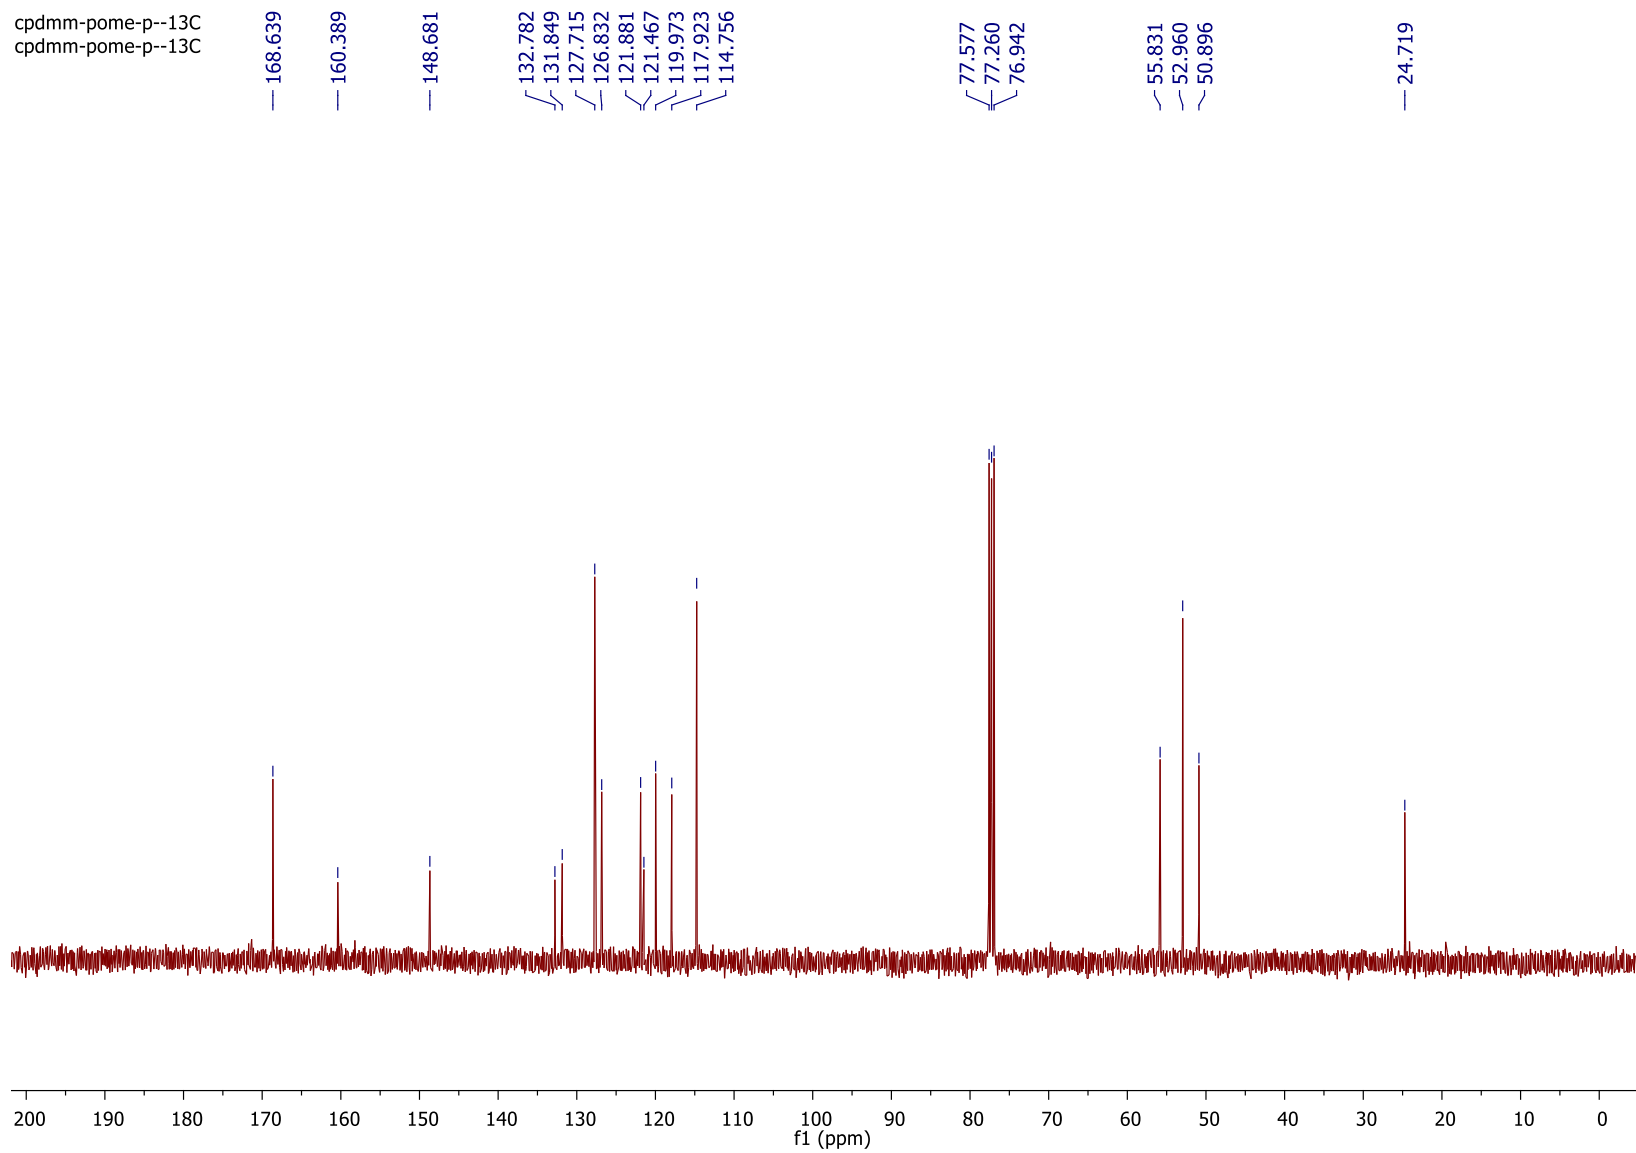

<sup>1</sup>H spectrum of compound **3ag** (400 MHz, CDCl<sub>3</sub>)

DMM-SCH3--1H  
DMM-SCH3--1H

7.726  
7.704  
7.664  
7.643  
7.487  
7.465  
7.423  
7.402  
7.344  
7.326  
7.306  
7.135  
7.117  
7.098

3.713  
3.696  
3.656  
3.639  
3.633  
3.617  
3.592

2.573

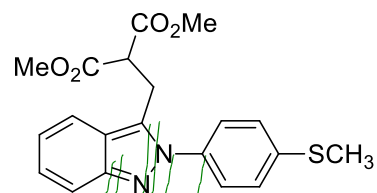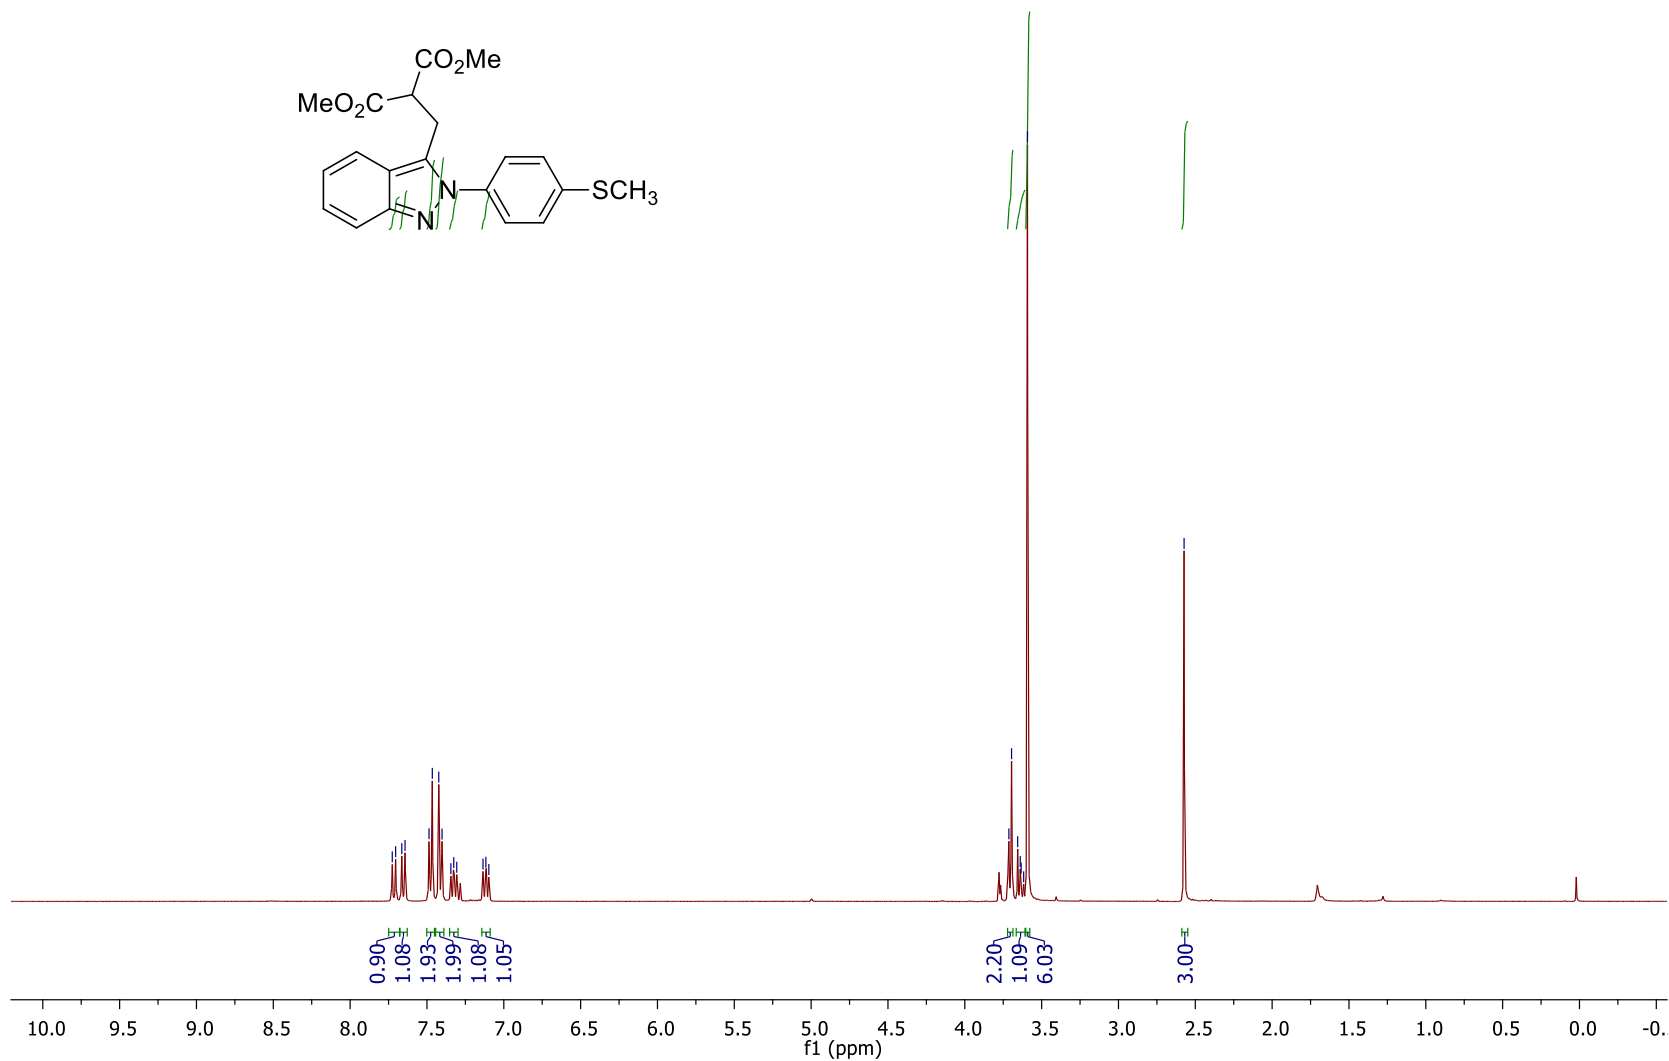

<sup>13</sup>C spectrum of compound **3ag** (100 MHz, CDCl<sub>3</sub>)

DMM-SCH3-13C  
DMM-SCH3-13C

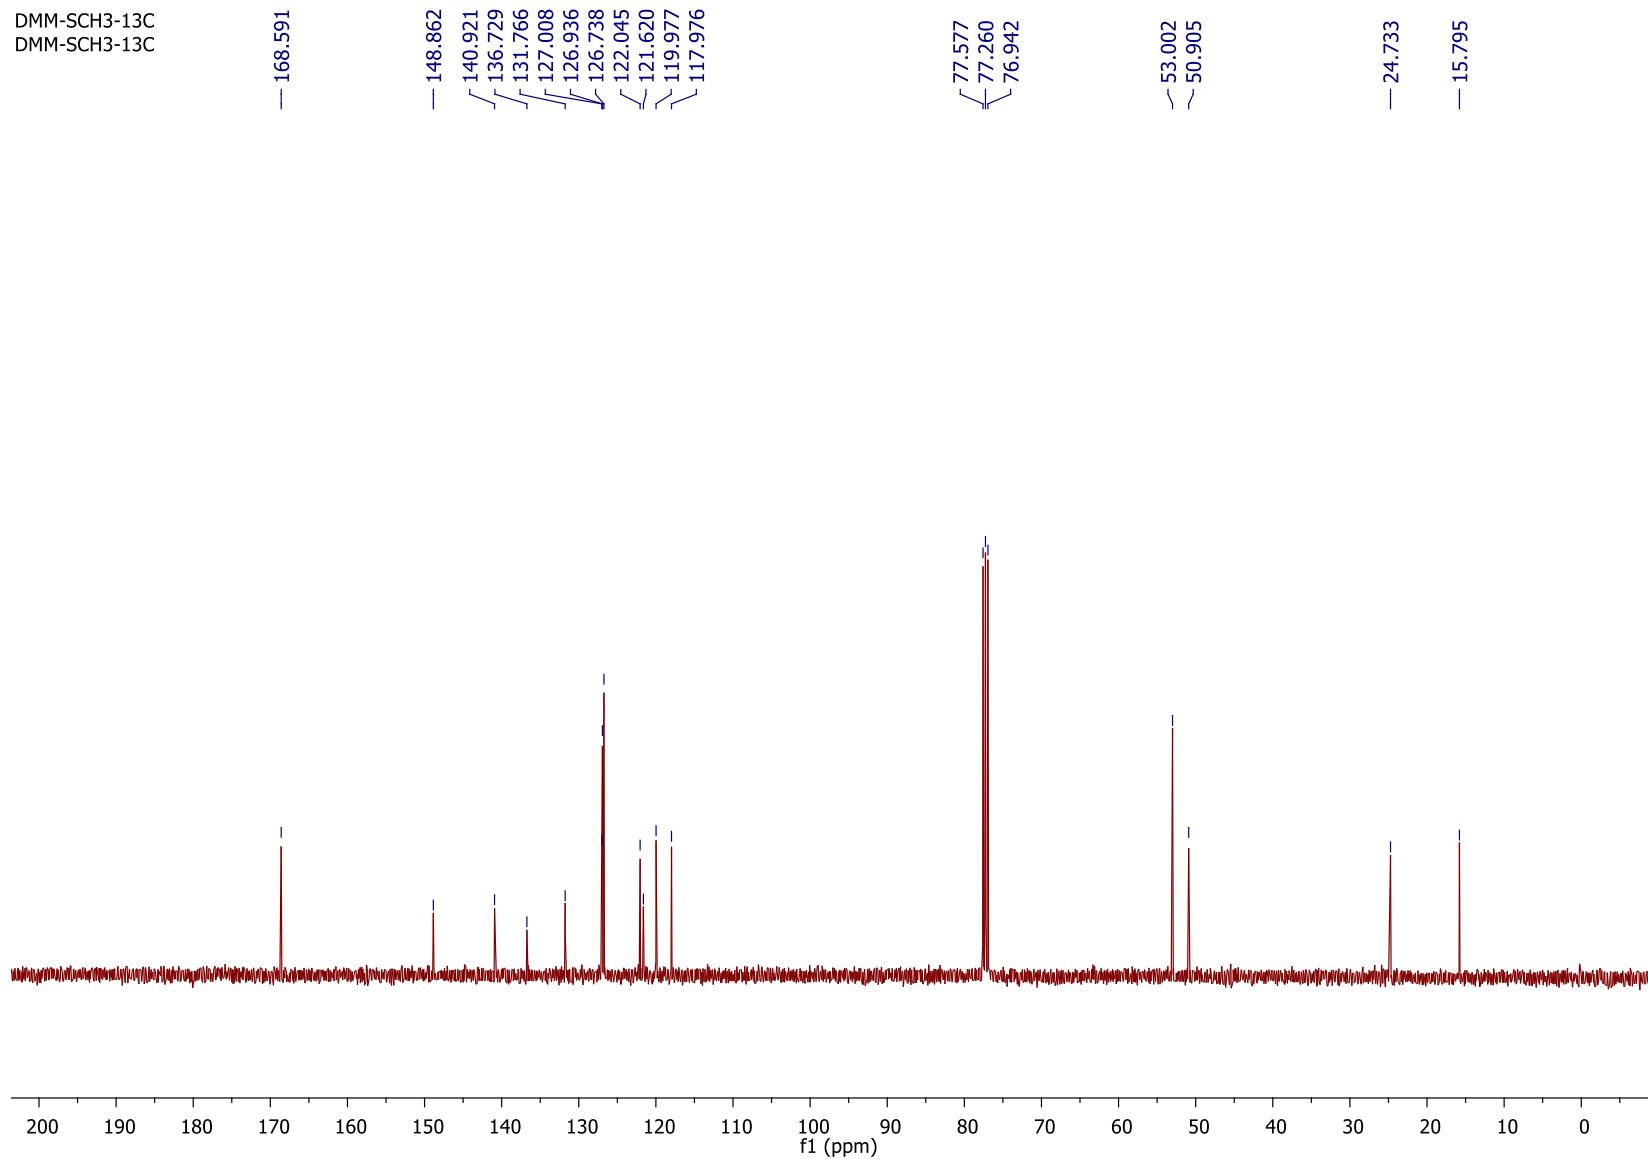

<sup>1</sup>H spectrum of compound **3ah** (400 MHz, CDCl<sub>3</sub>)

DMM-3,4DIME-1-1H  
DMM-3,5DIME-1-1H

7.730  
7.708  
7.668  
7.647  
7.338  
7.336  
7.319  
7.300  
7.284  
7.271  
7.266  
7.250  
7.246  
7.130  
7.112  
7.093

3.720  
3.702  
3.652  
3.635  
3.630  
3.613  
3.593

2.380  
2.369

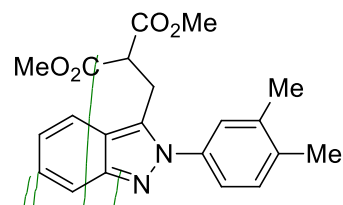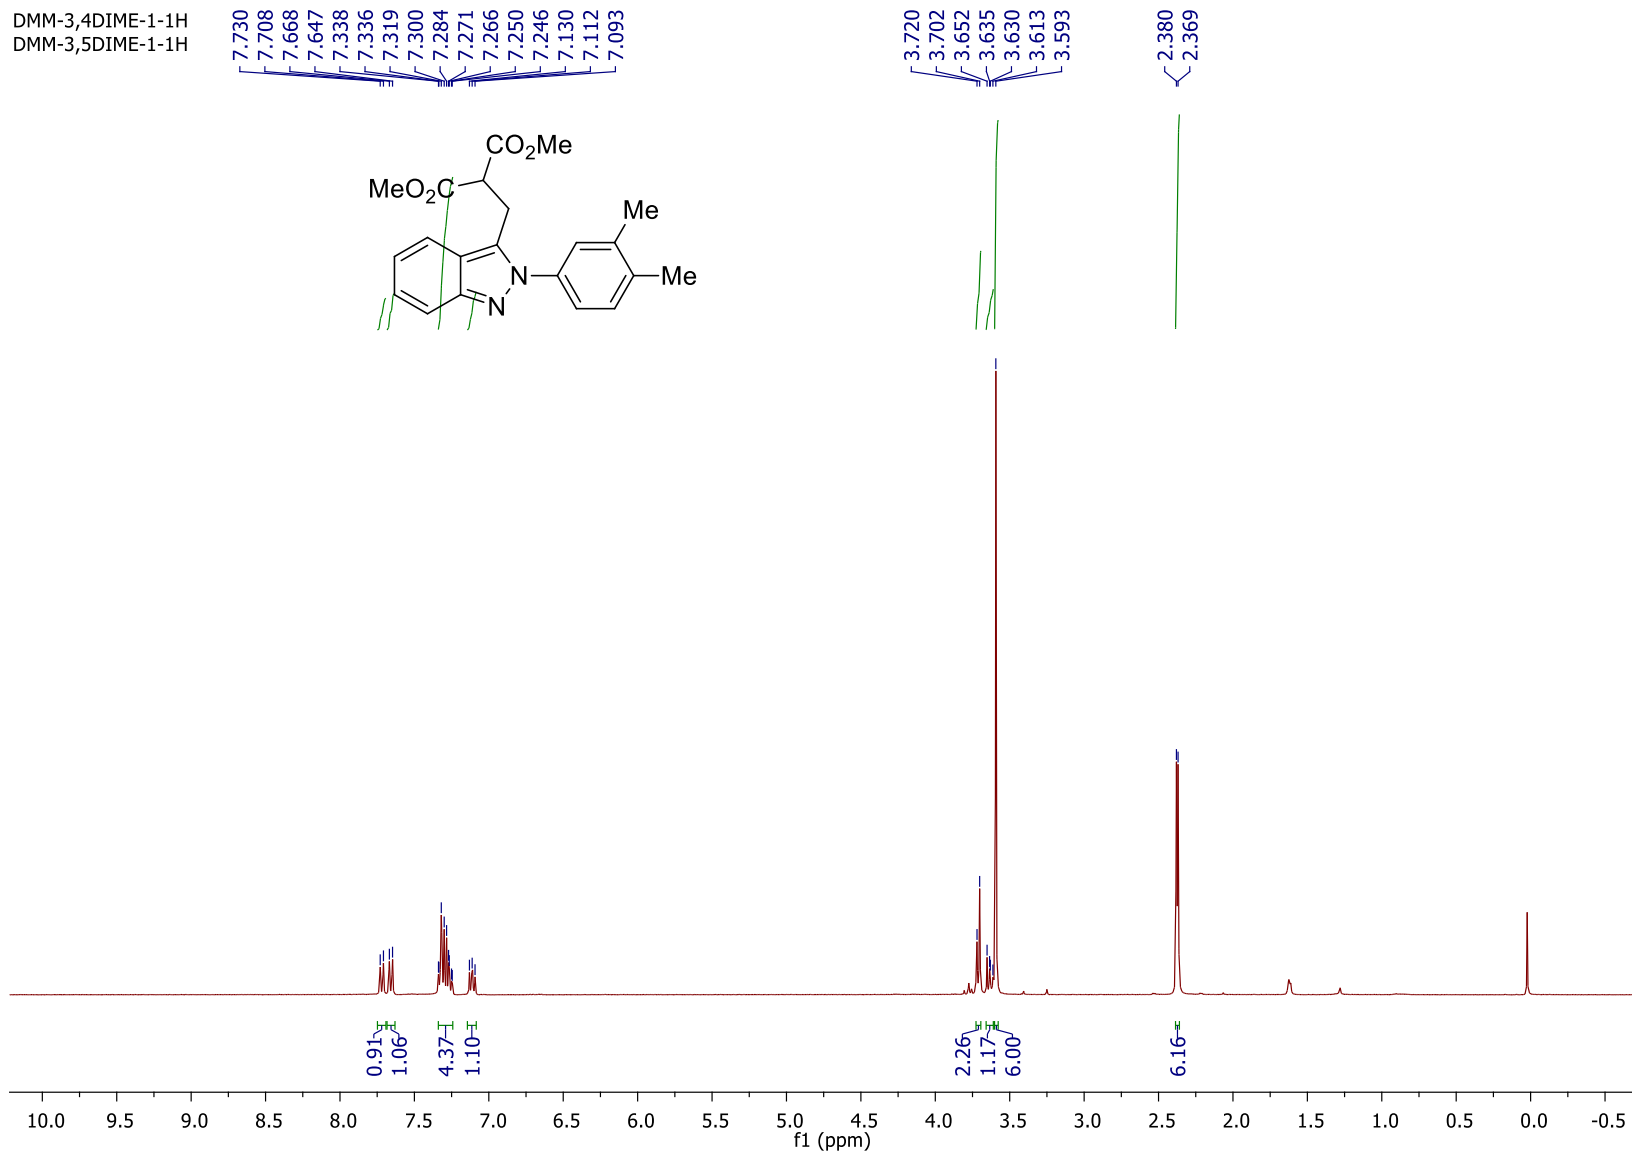

$^{13}\text{C}$  spectrum of compound **3ah** (100 MHz,  $\text{CDCl}_3$ )

cpdmm-3,4dime-p--13C  
cpdmm-3,4dime-p--13C

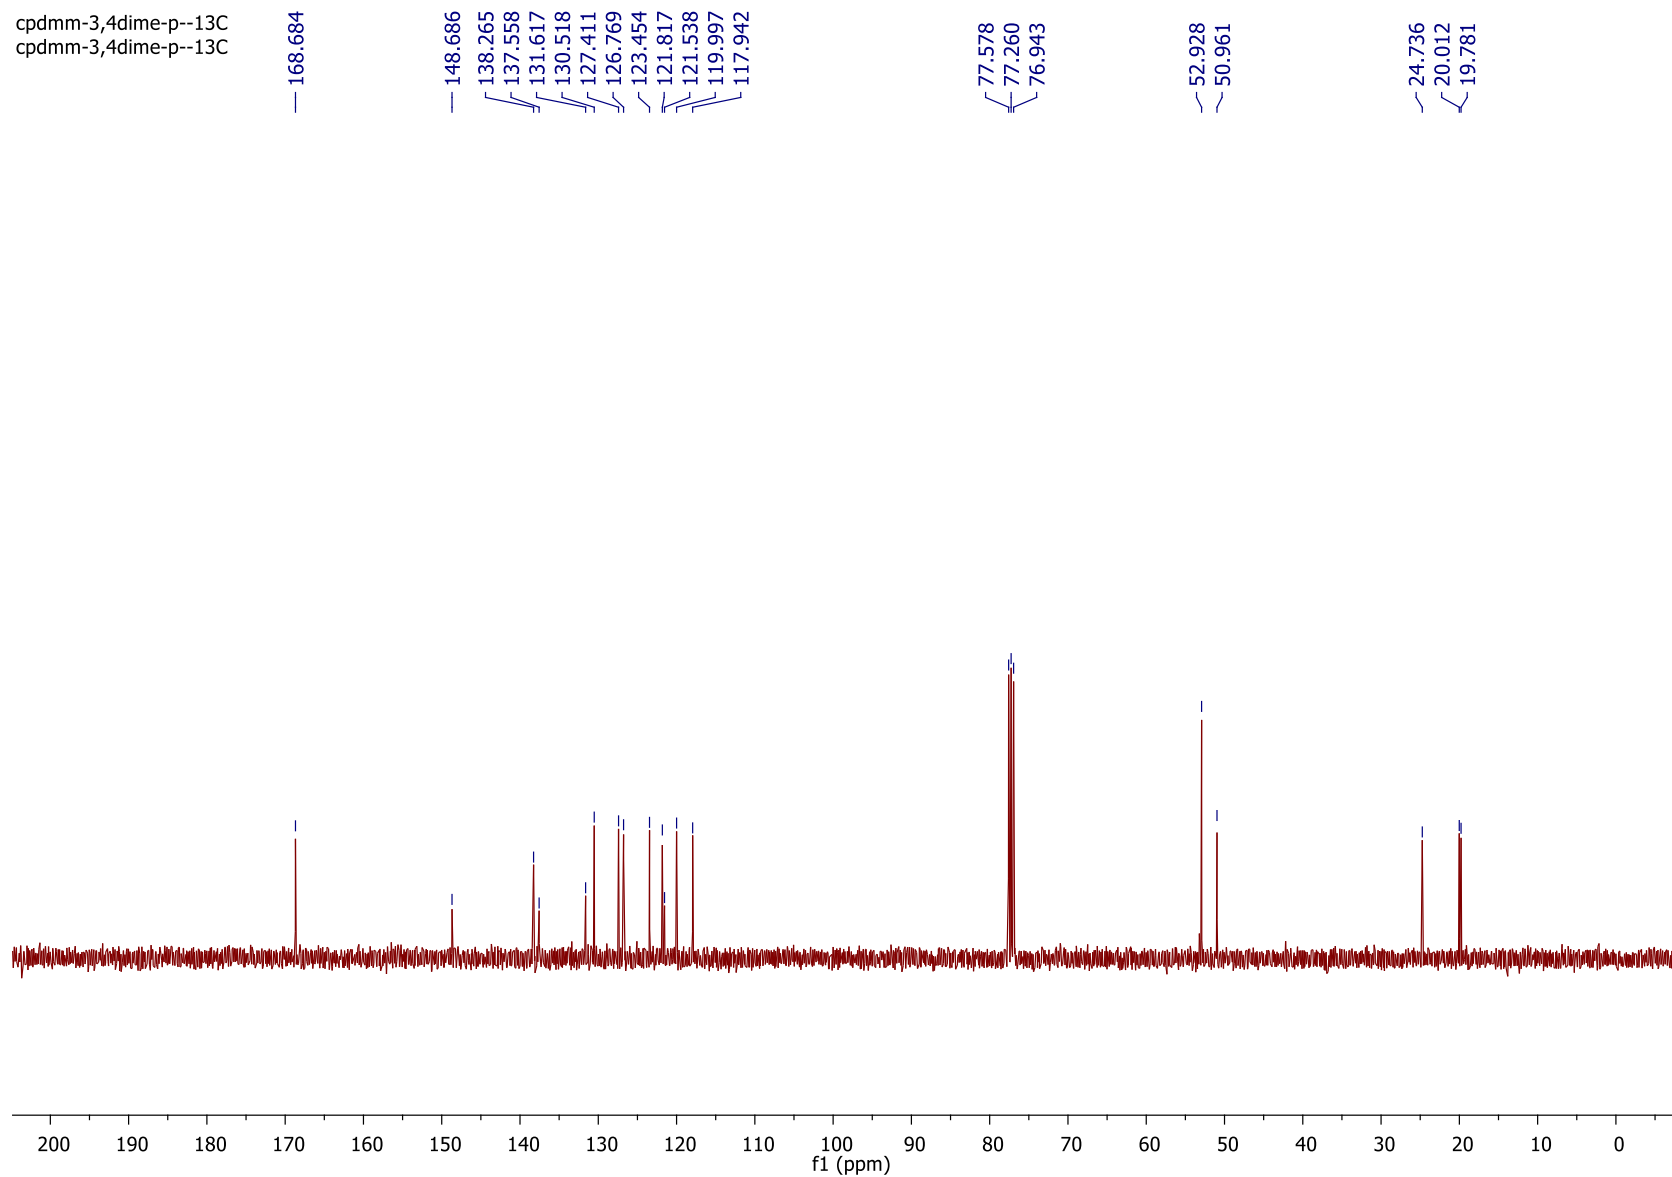

<sup>1</sup>H spectrum of compound **3ai** (400 MHz, CDCl<sub>3</sub>)

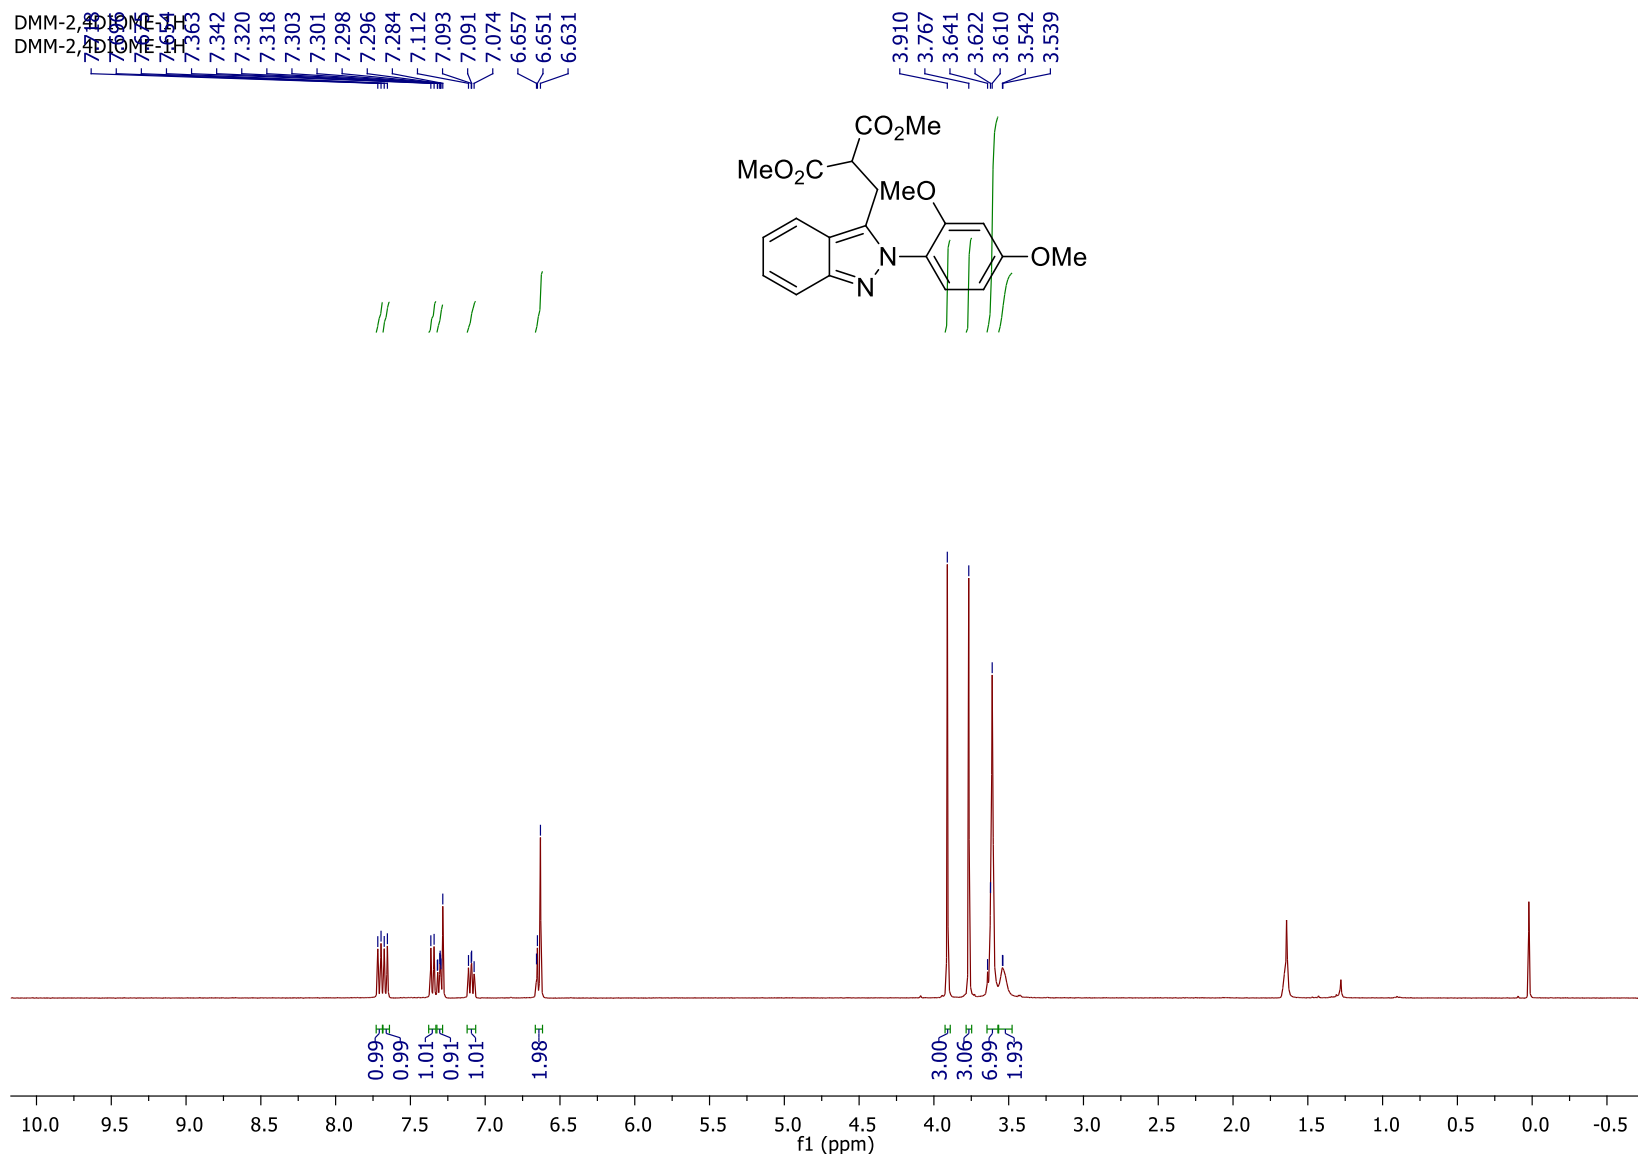

$^{13}\text{C}$  spectrum of compound **3ai** (100 MHz,  $\text{CDCl}_3$ )

DMM-2,4DIOME-13C  
DMM-2,4DIOME-13C

— 168.937  
— 162.162  
— 155.615  
— 148.981

133.735  
129.982  
126.580  
121.835  
121.564  
120.969  
120.218  
118.023

— 105.041  
— 99.713

77.577  
77.260  
76.942

56.076  
55.924  
52.940  
50.811

— 24.669

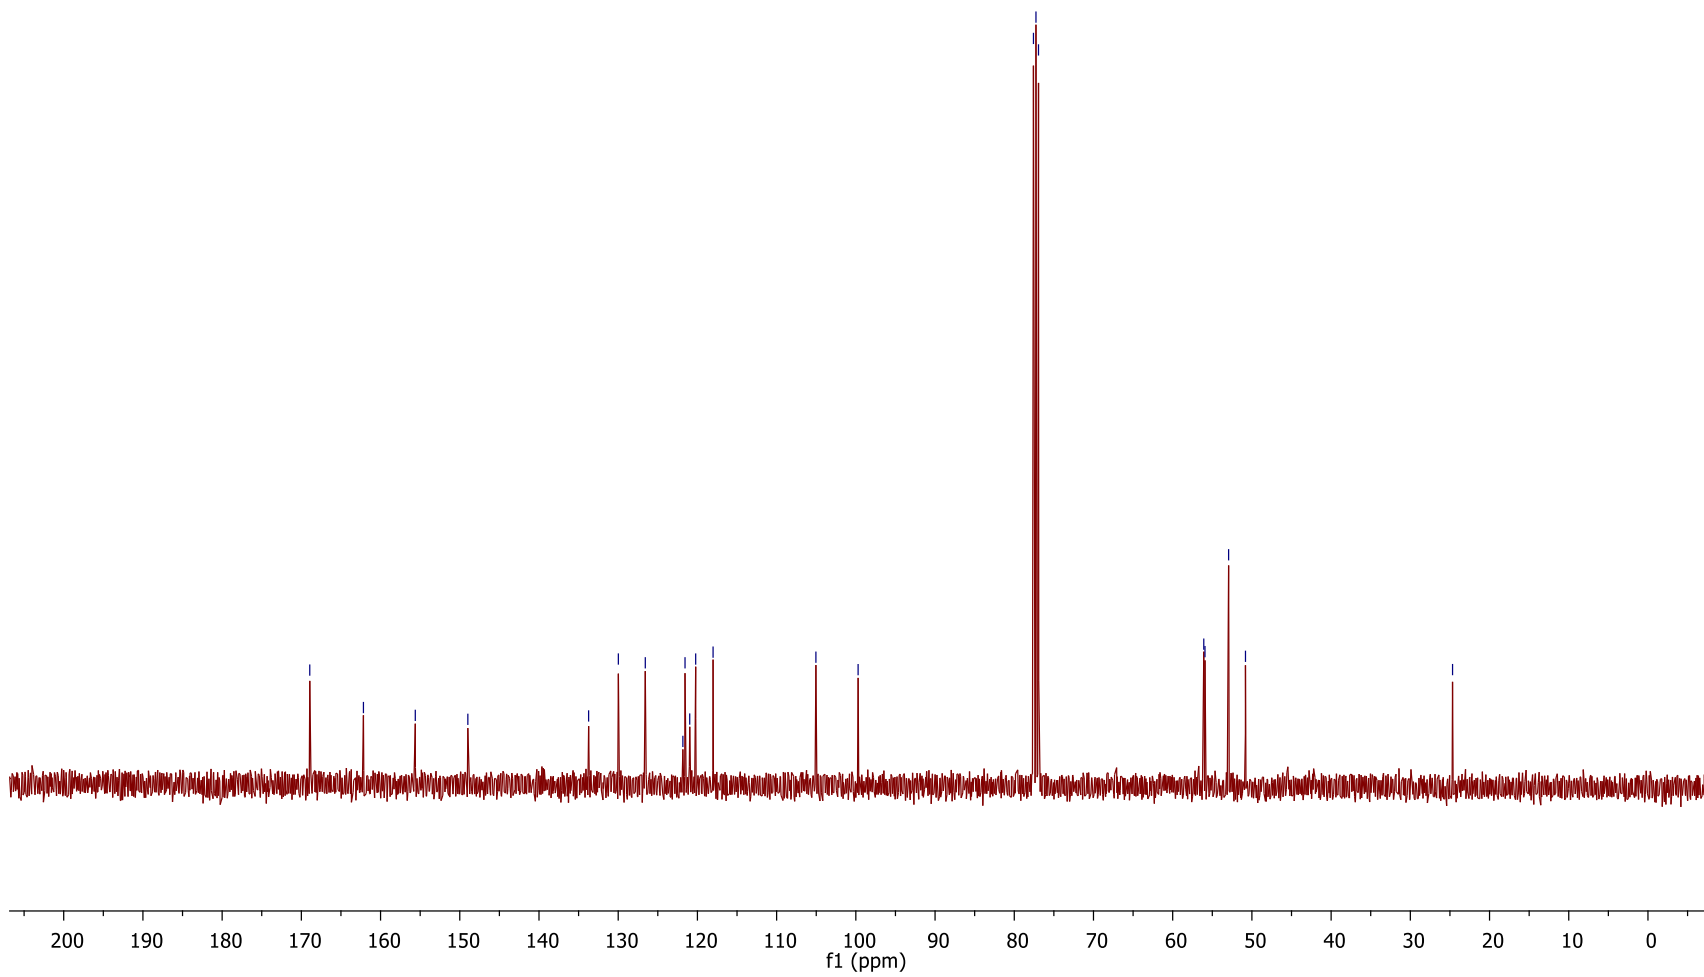

S56



<sup>1</sup>H spectrum of compound **3aj** (400 MHz, CDCl<sub>3</sub>)

DMM-3,4DIOME-3-1H  
DMM-3,4DIOME-3-1H

7.731  
7.710  
7.669  
7.648  
7.349  
7.330  
7.310  
7.284  
7.139  
7.117  
7.111  
7.102  
7.097  
7.022  
7.013  
7.007  
6.999

3.991  
3.951  
3.714  
3.709  
3.692  
3.665  
3.649  
3.642  
3.626  
3.604

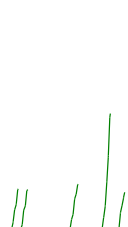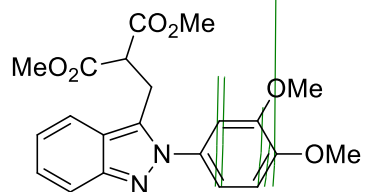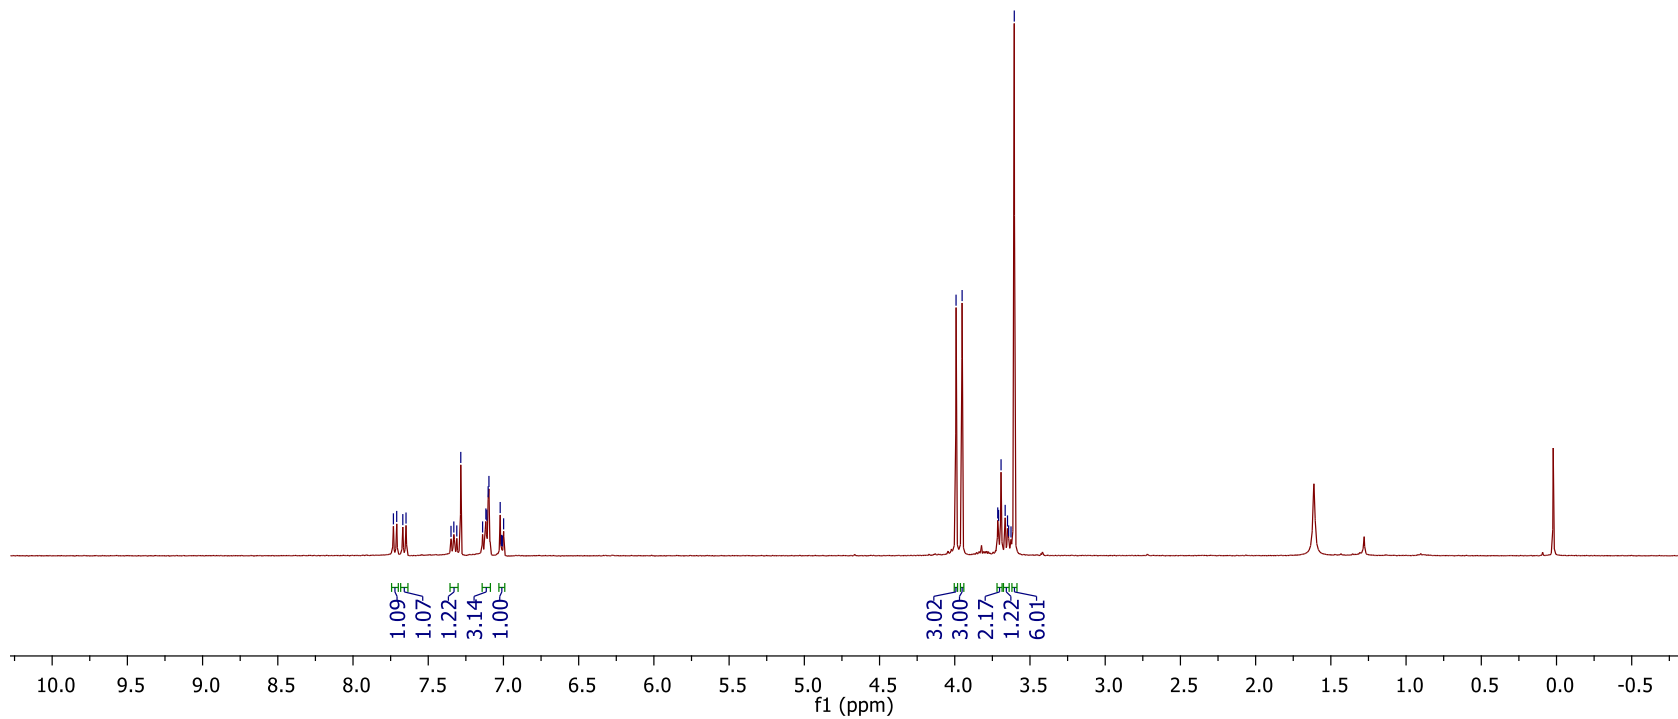

<sup>13</sup>C spectrum of compound **3aj** (100 MHz, CDCl<sub>3</sub>)

DMM-3,4DIOME-13C  
DMM-3,4DIOME-13C

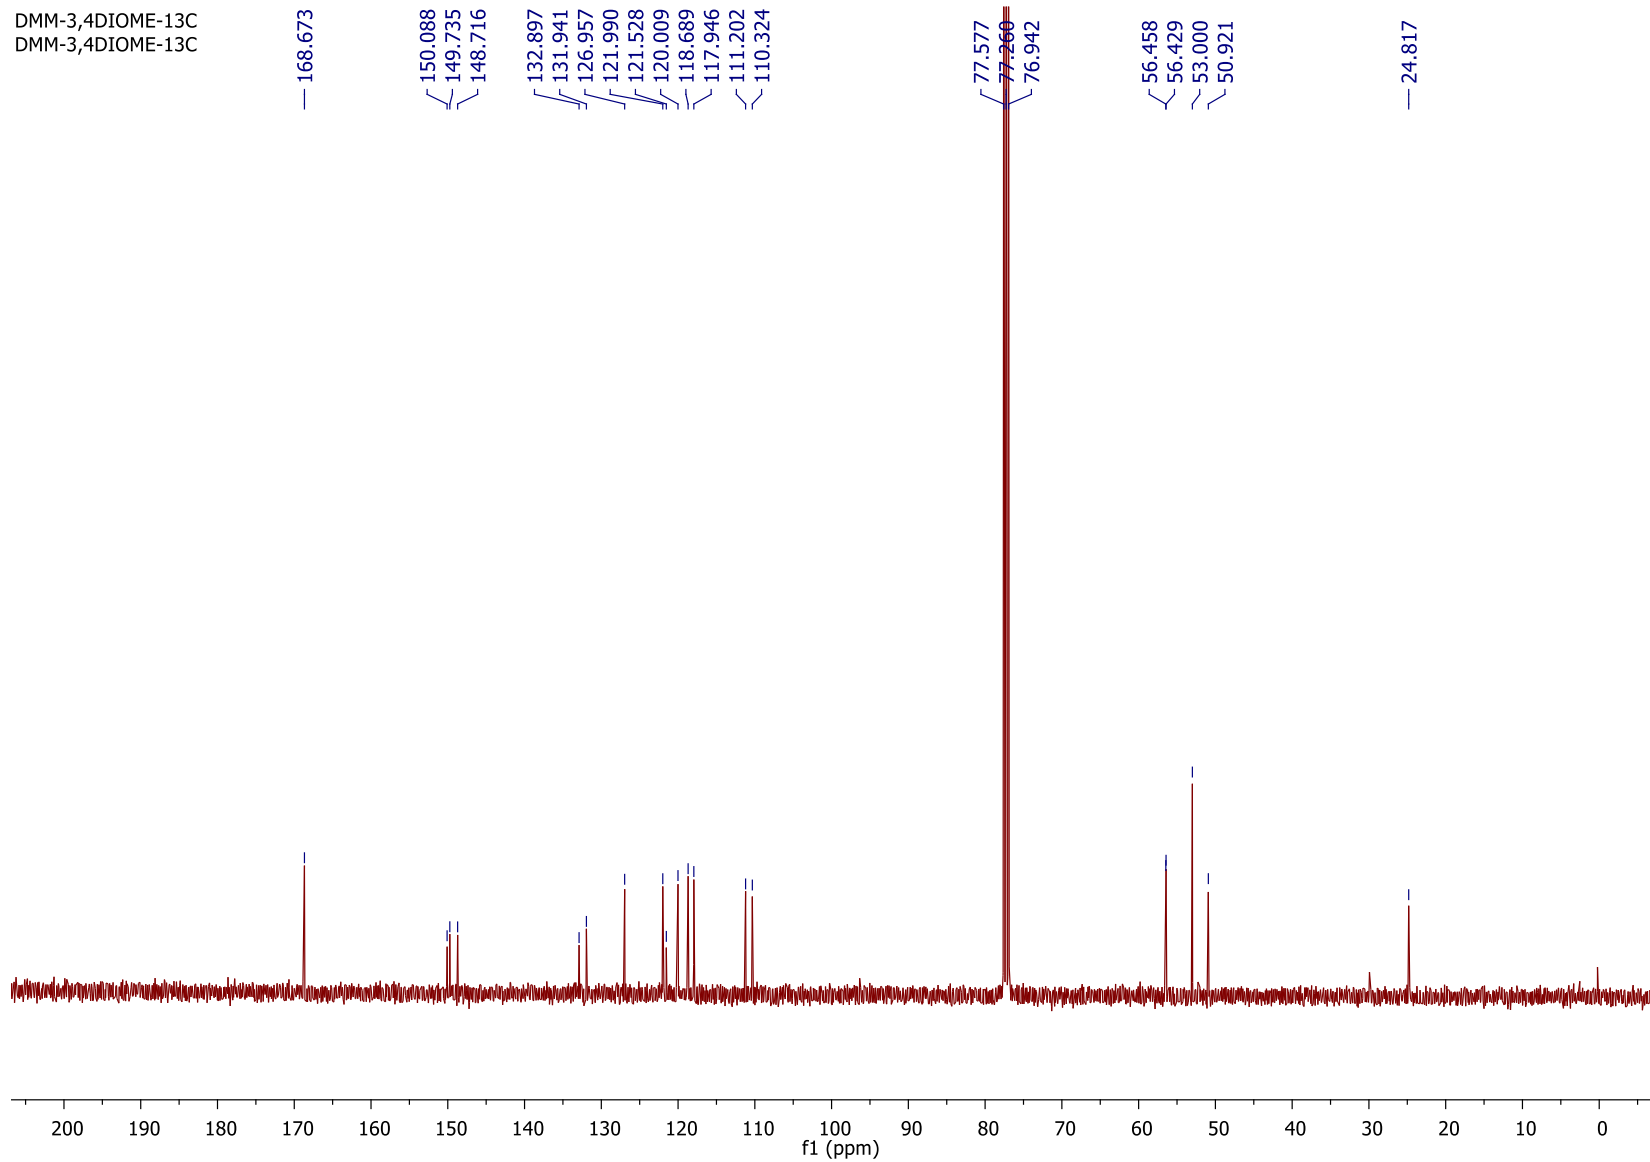

<sup>1</sup>H spectrum of compound **3ak** (400 MHz, CDCl<sub>3</sub>)

DMM-3,5 DIOME-1H  
DMM-3,5 DIOME-1H

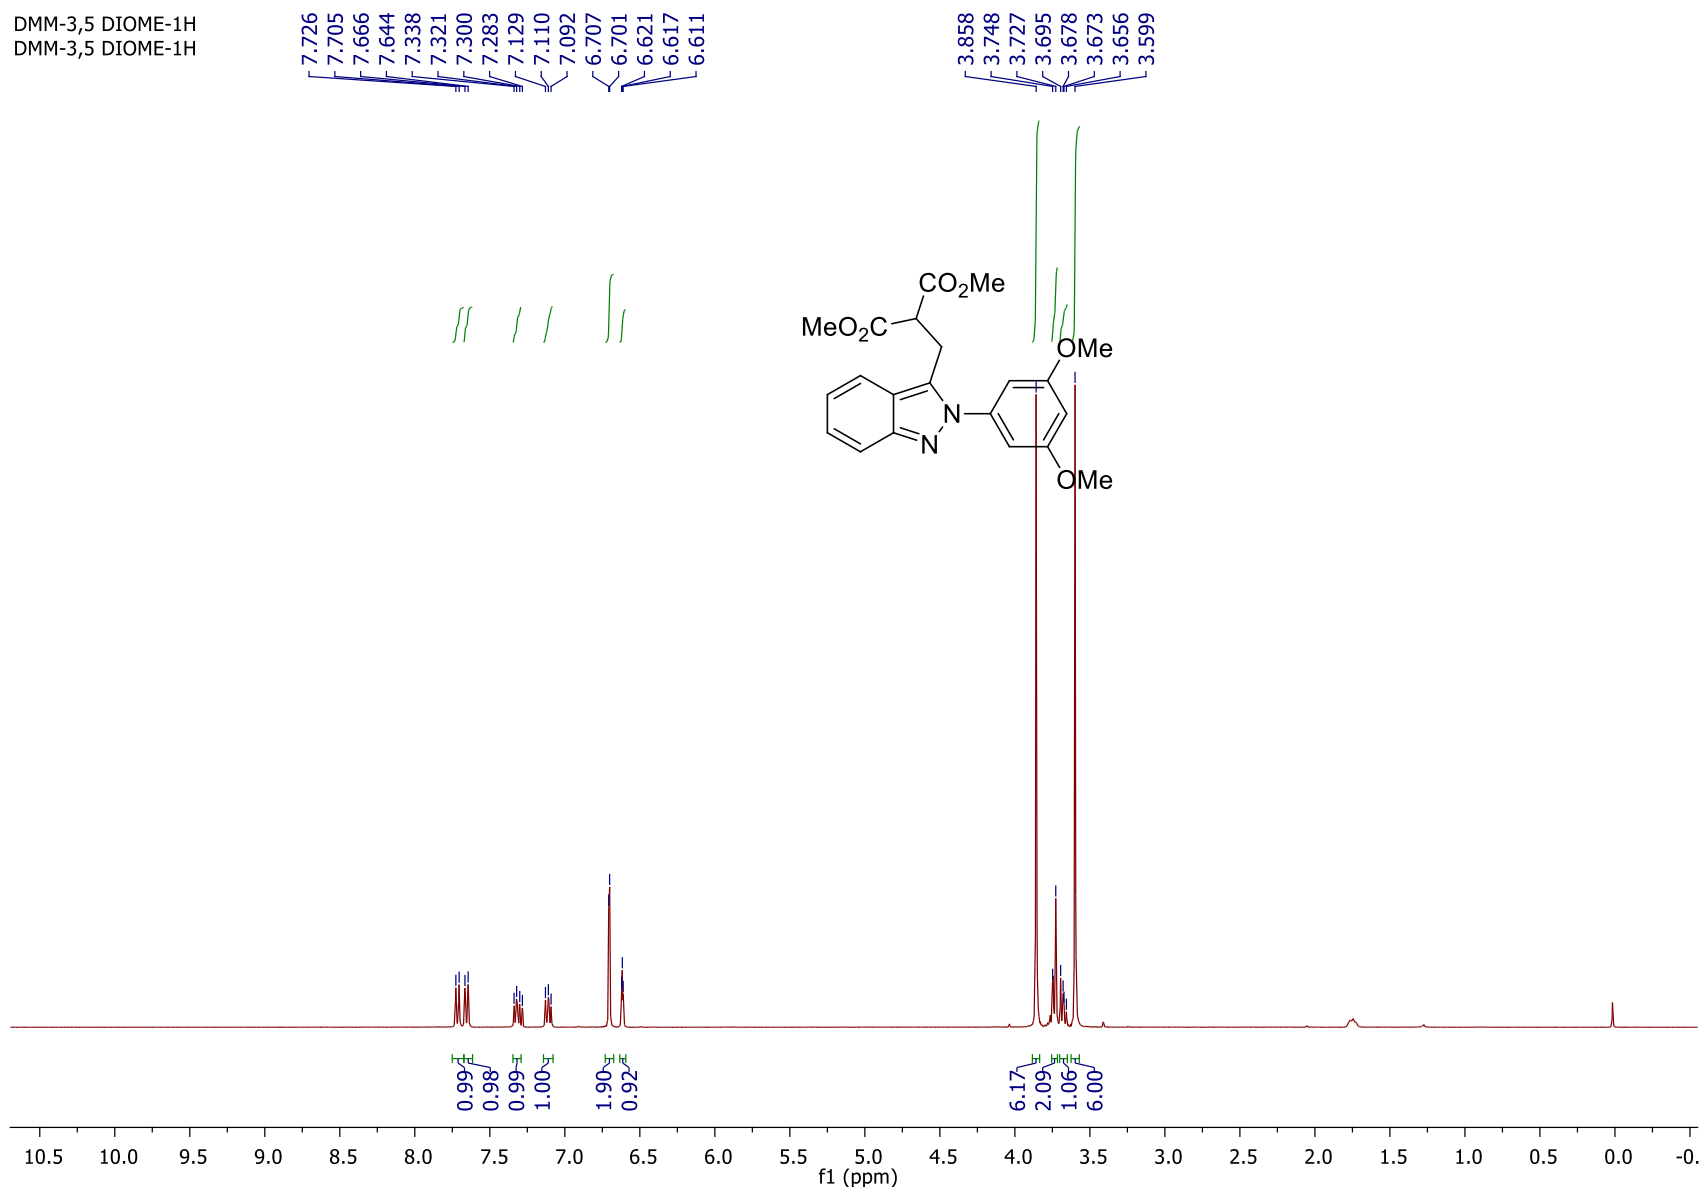

<sup>13</sup>C spectrum of compound **3ak** (100 MHz, CDCl<sub>3</sub>)

DMM-3,5DIOME-13C  
DMM-3,5DIOME-13C

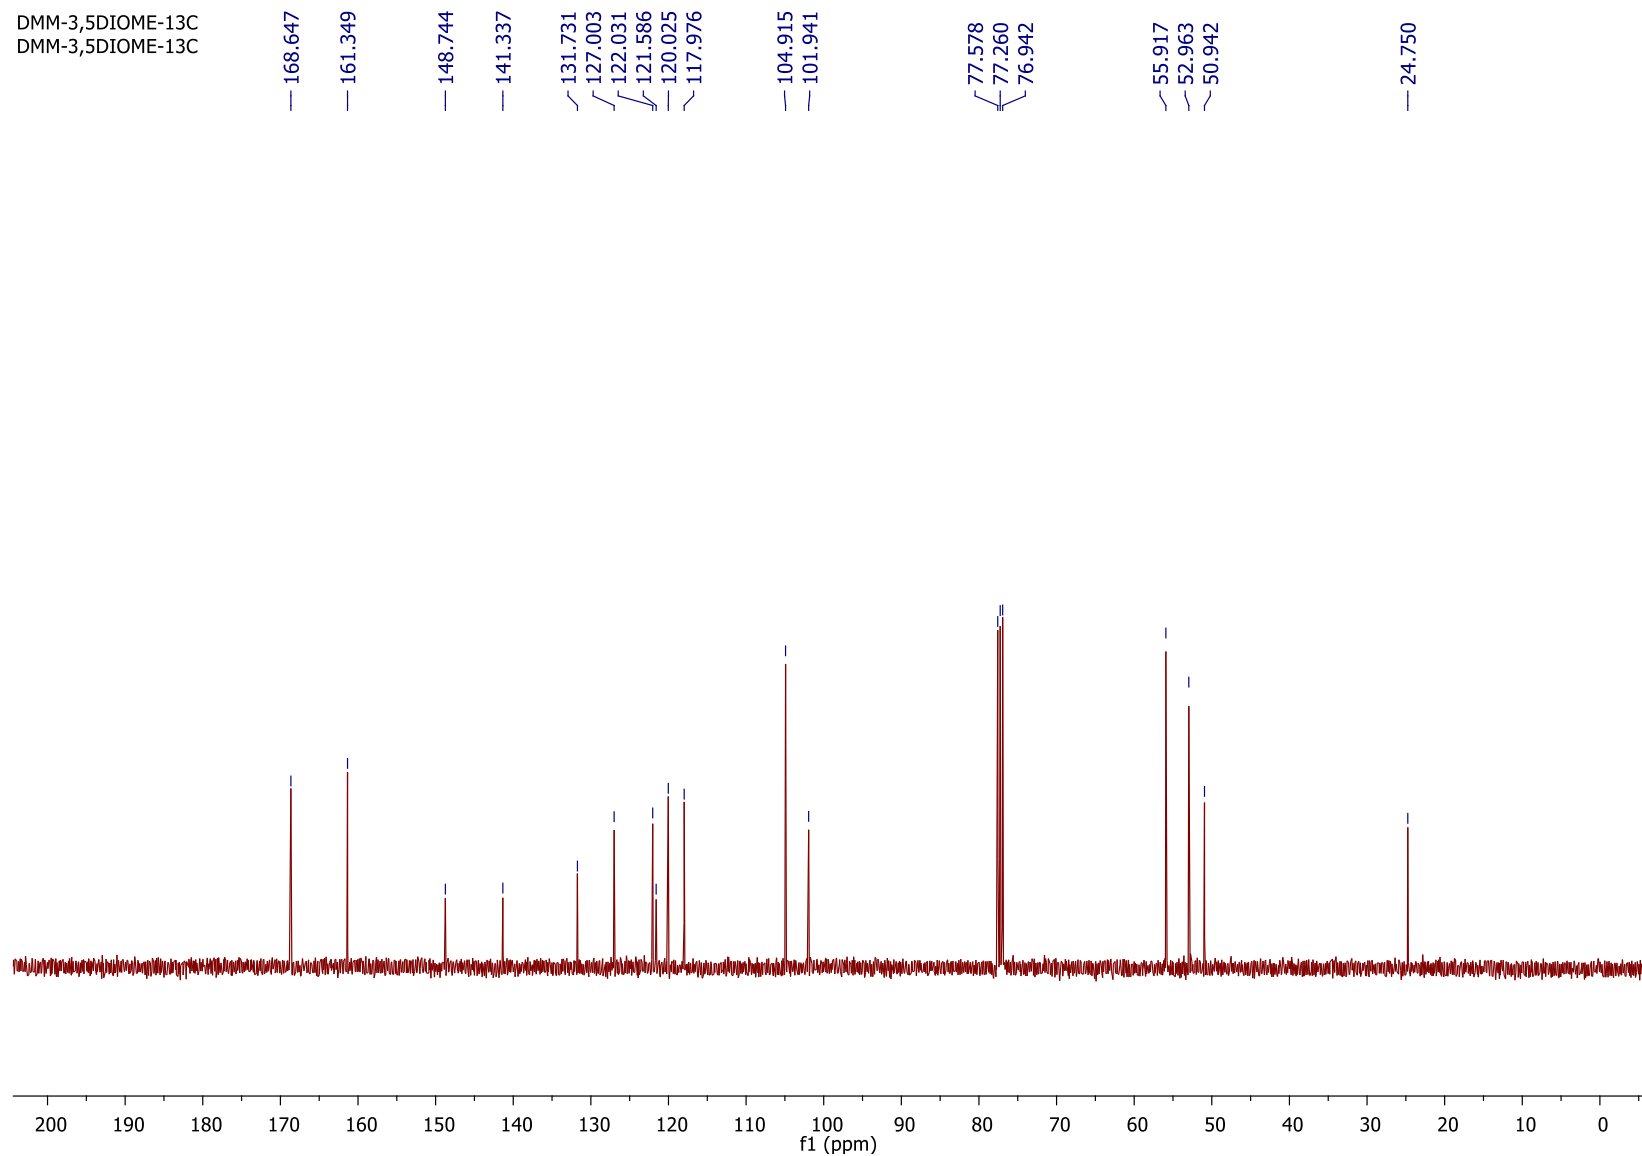

<sup>1</sup>H spectrum of compound **3al** (500 MHz, CDCl<sub>3</sub>)

DMM-PMDA-P-1H  
DMM-PMDA-P-1H

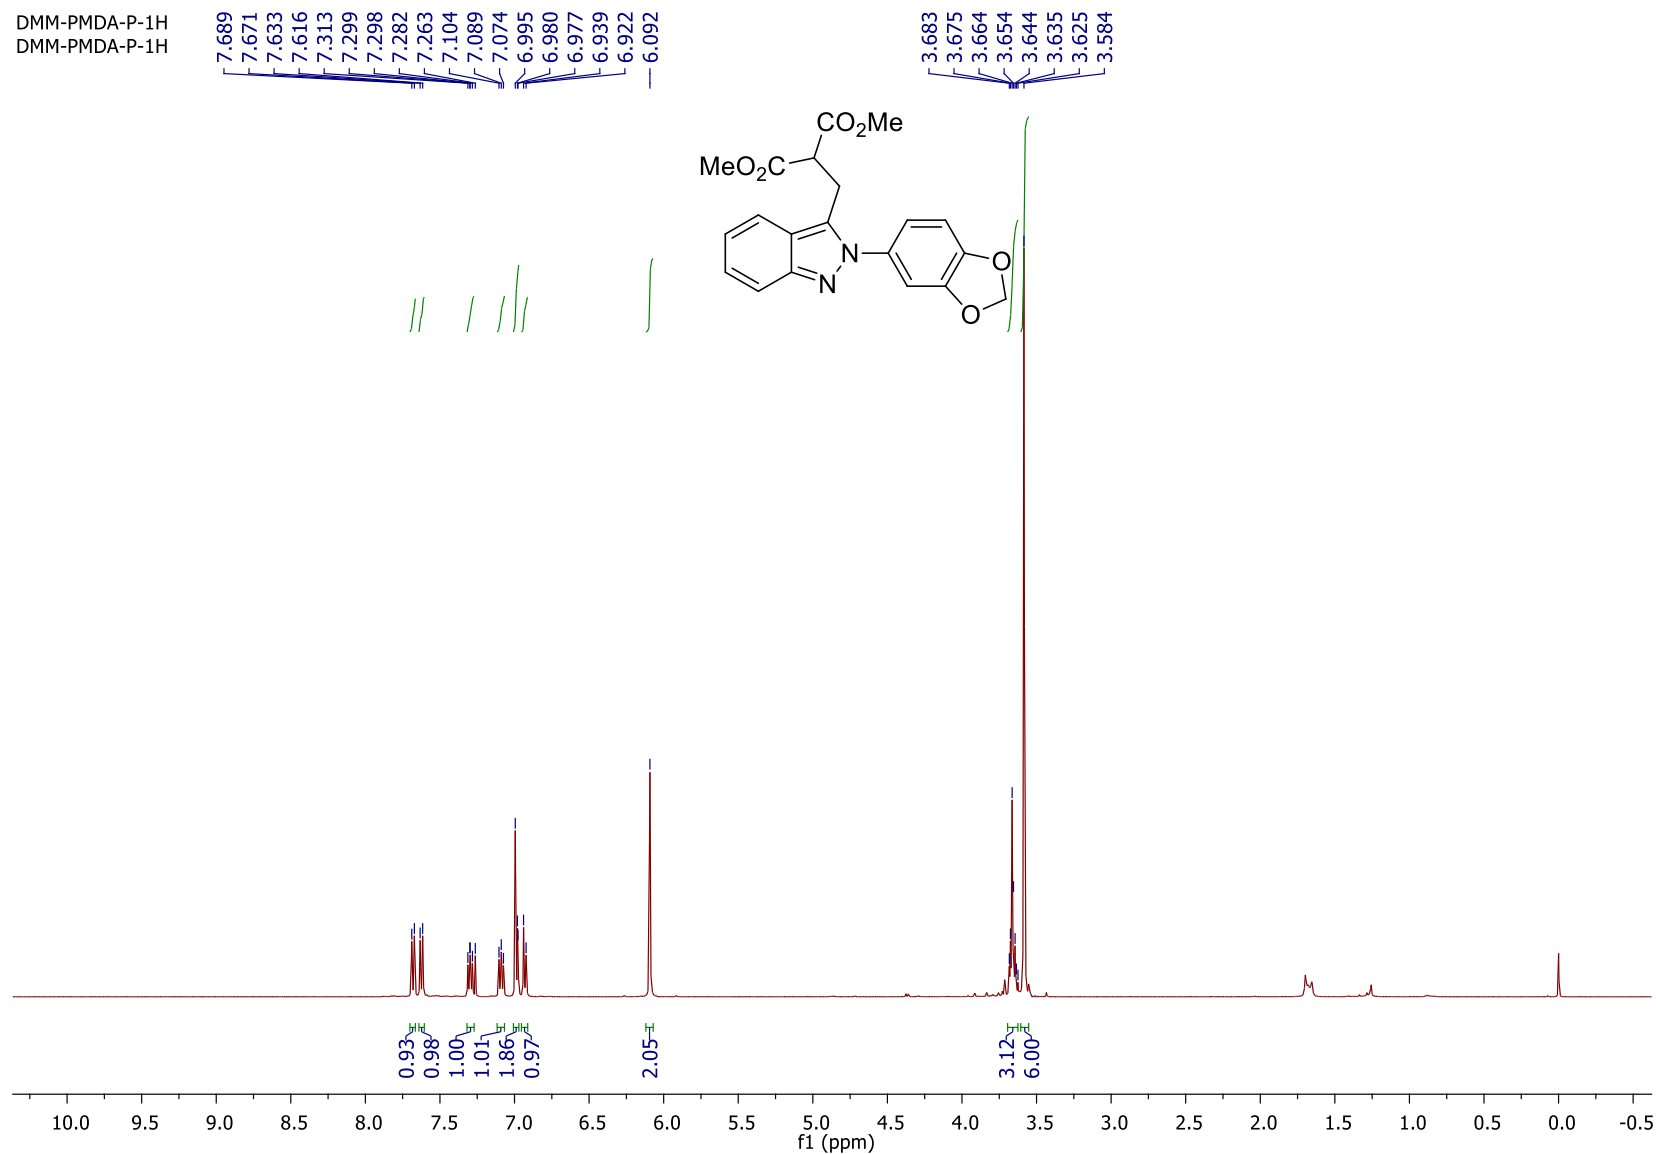

<sup>13</sup>C spectrum of compound **3al** (125 MHz, CDCl<sub>3</sub>)

DMM-PMDA-P-13C  
DMM-PMDA-P-13C

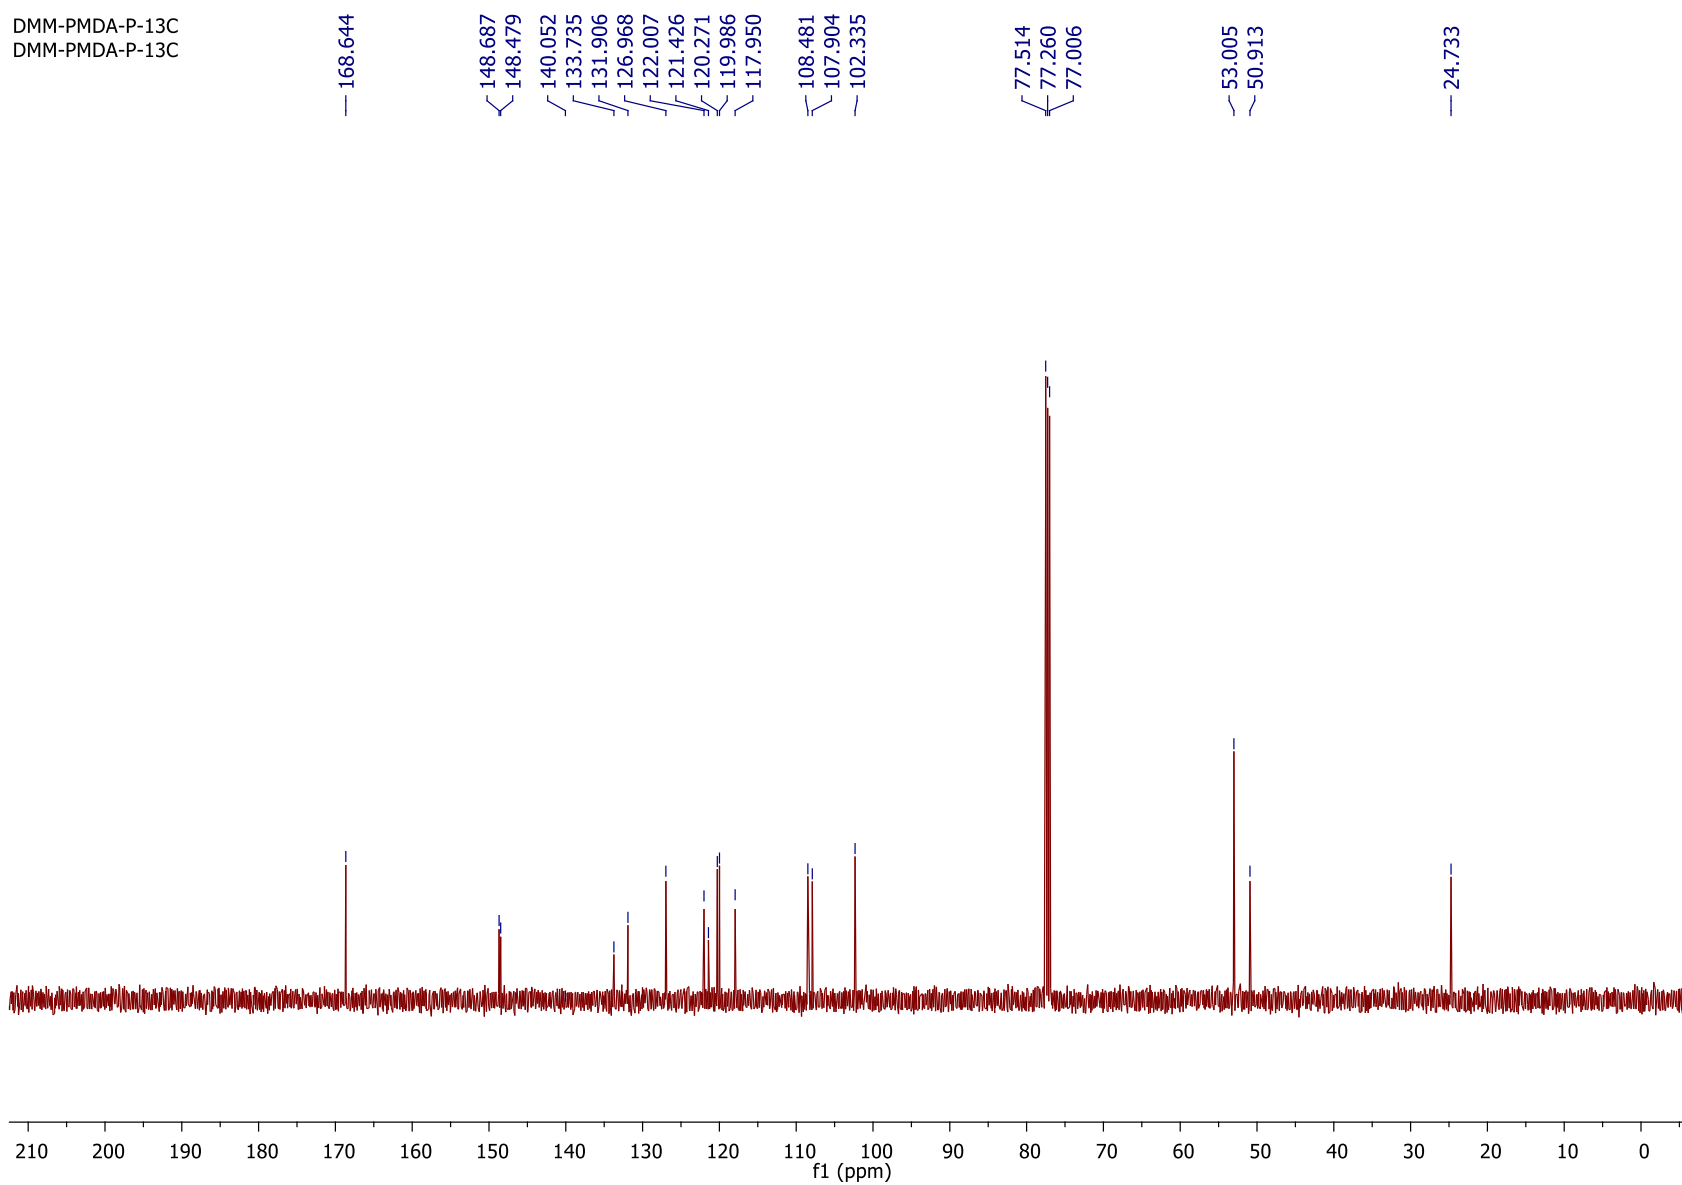

<sup>1</sup>H spectrum of compound **3am** (400 MHz, CDCl<sub>3</sub>)

CPDMM-PCL-1H  
CPDMM-PCL-1H

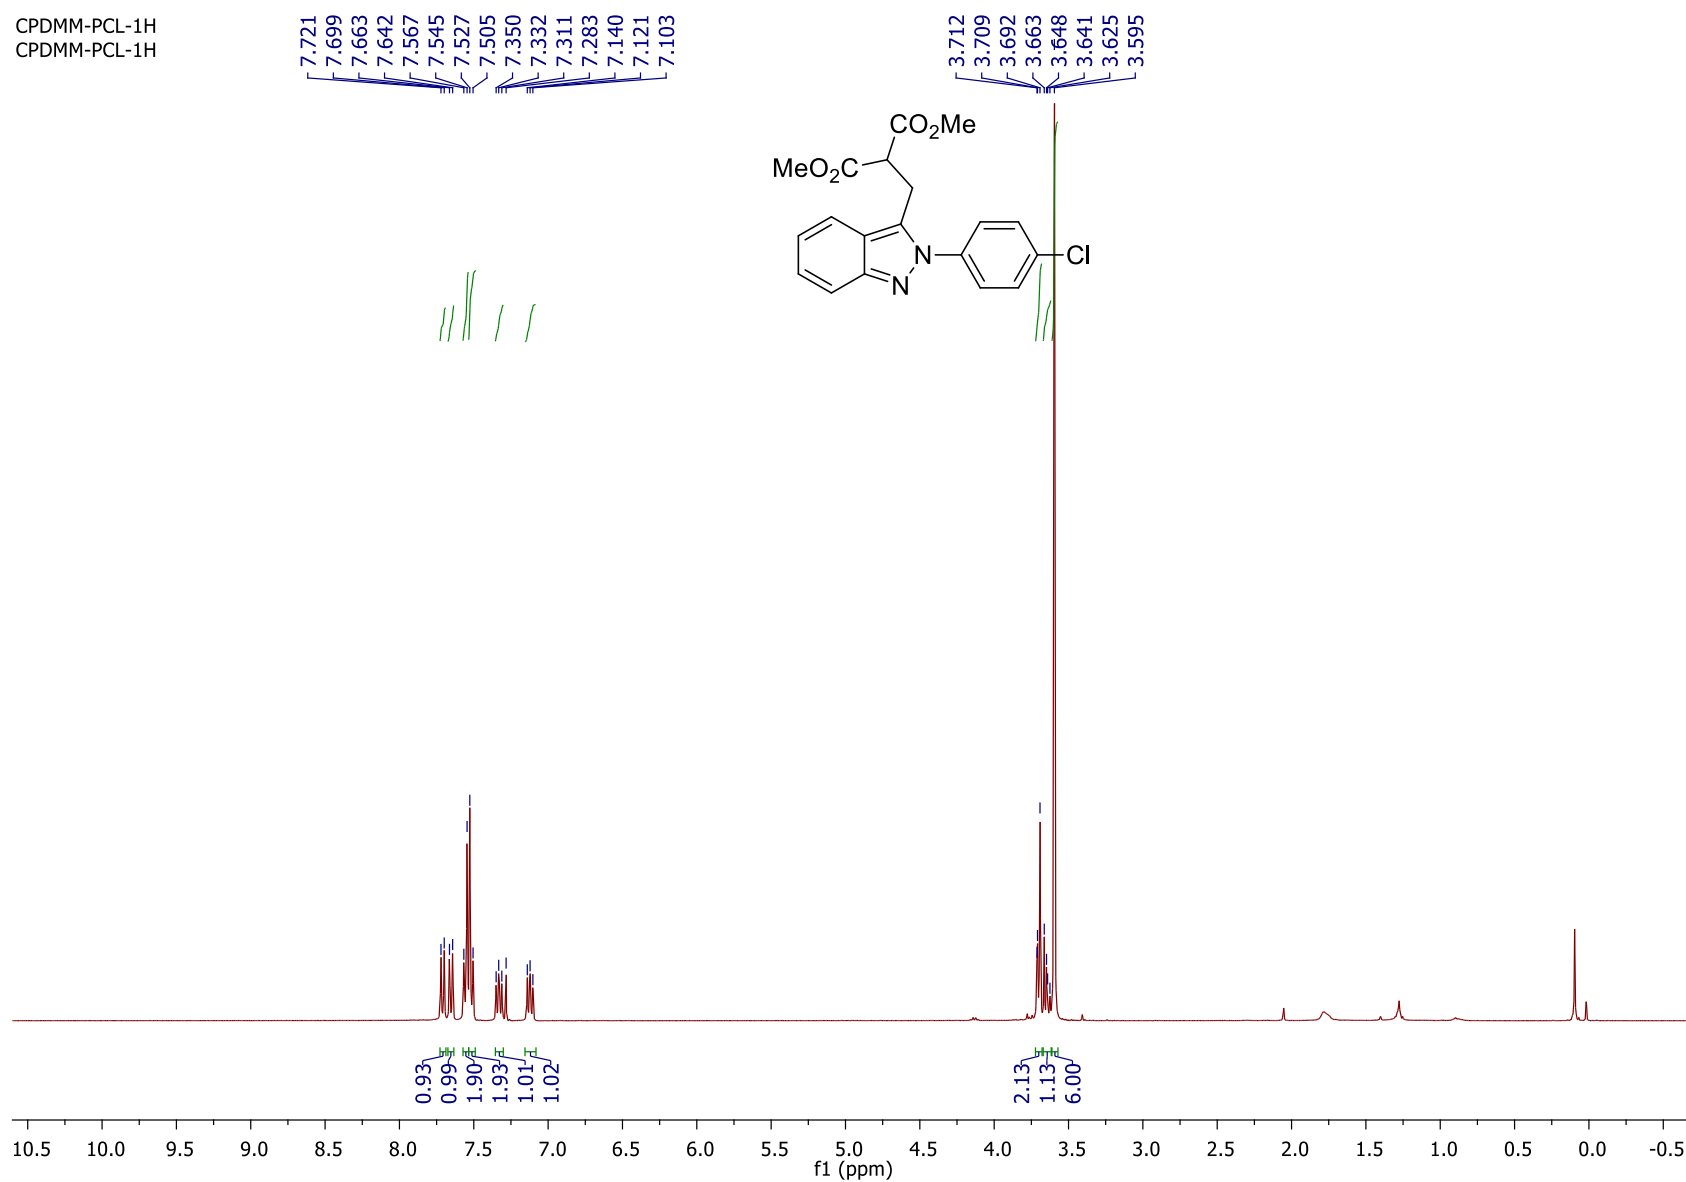

S63

<sup>13</sup>C spectrum of compound **3am** (100 MHz, CDCl<sub>3</sub>)

cpdmm-P-CL--13C  
cpdmm-P-CL--13C

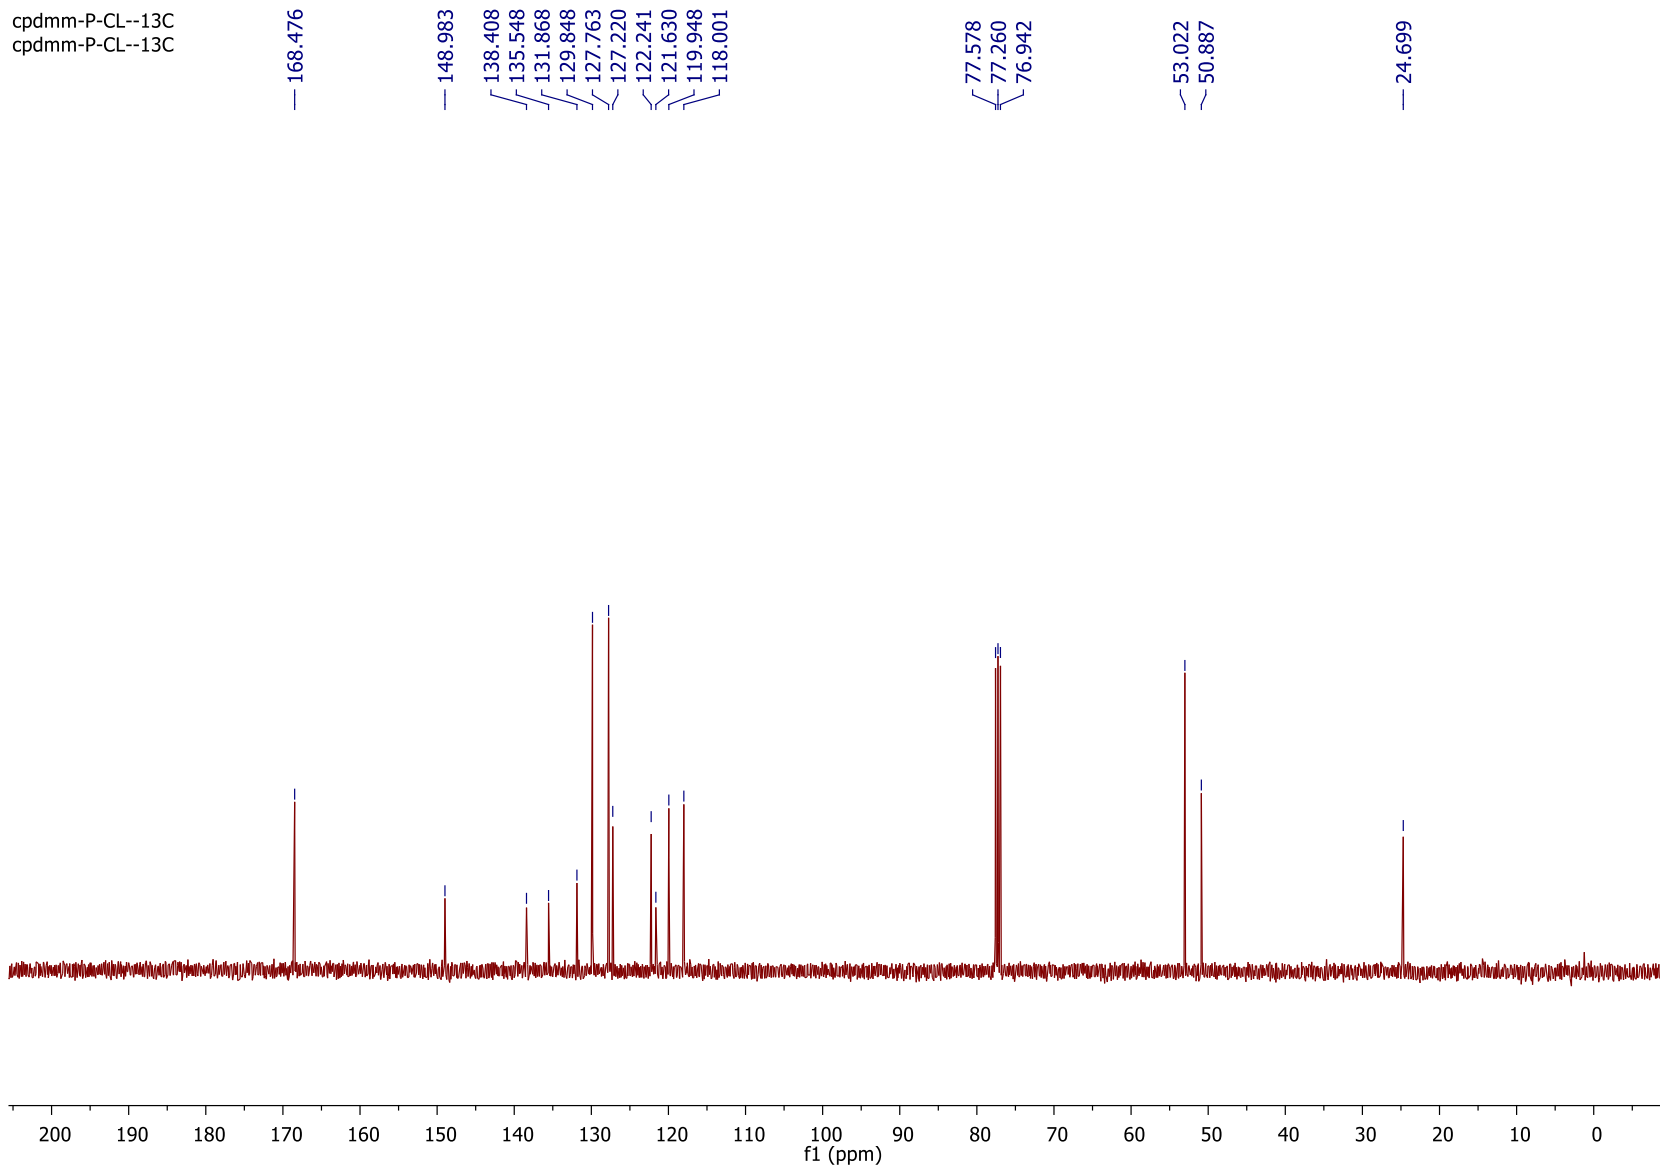



<sup>1</sup>H spectrum of compound **3an** (500 MHz, CDCl<sub>3</sub>)

CP-PH-Br-P-1H  
CP-PH-Br-P-1H

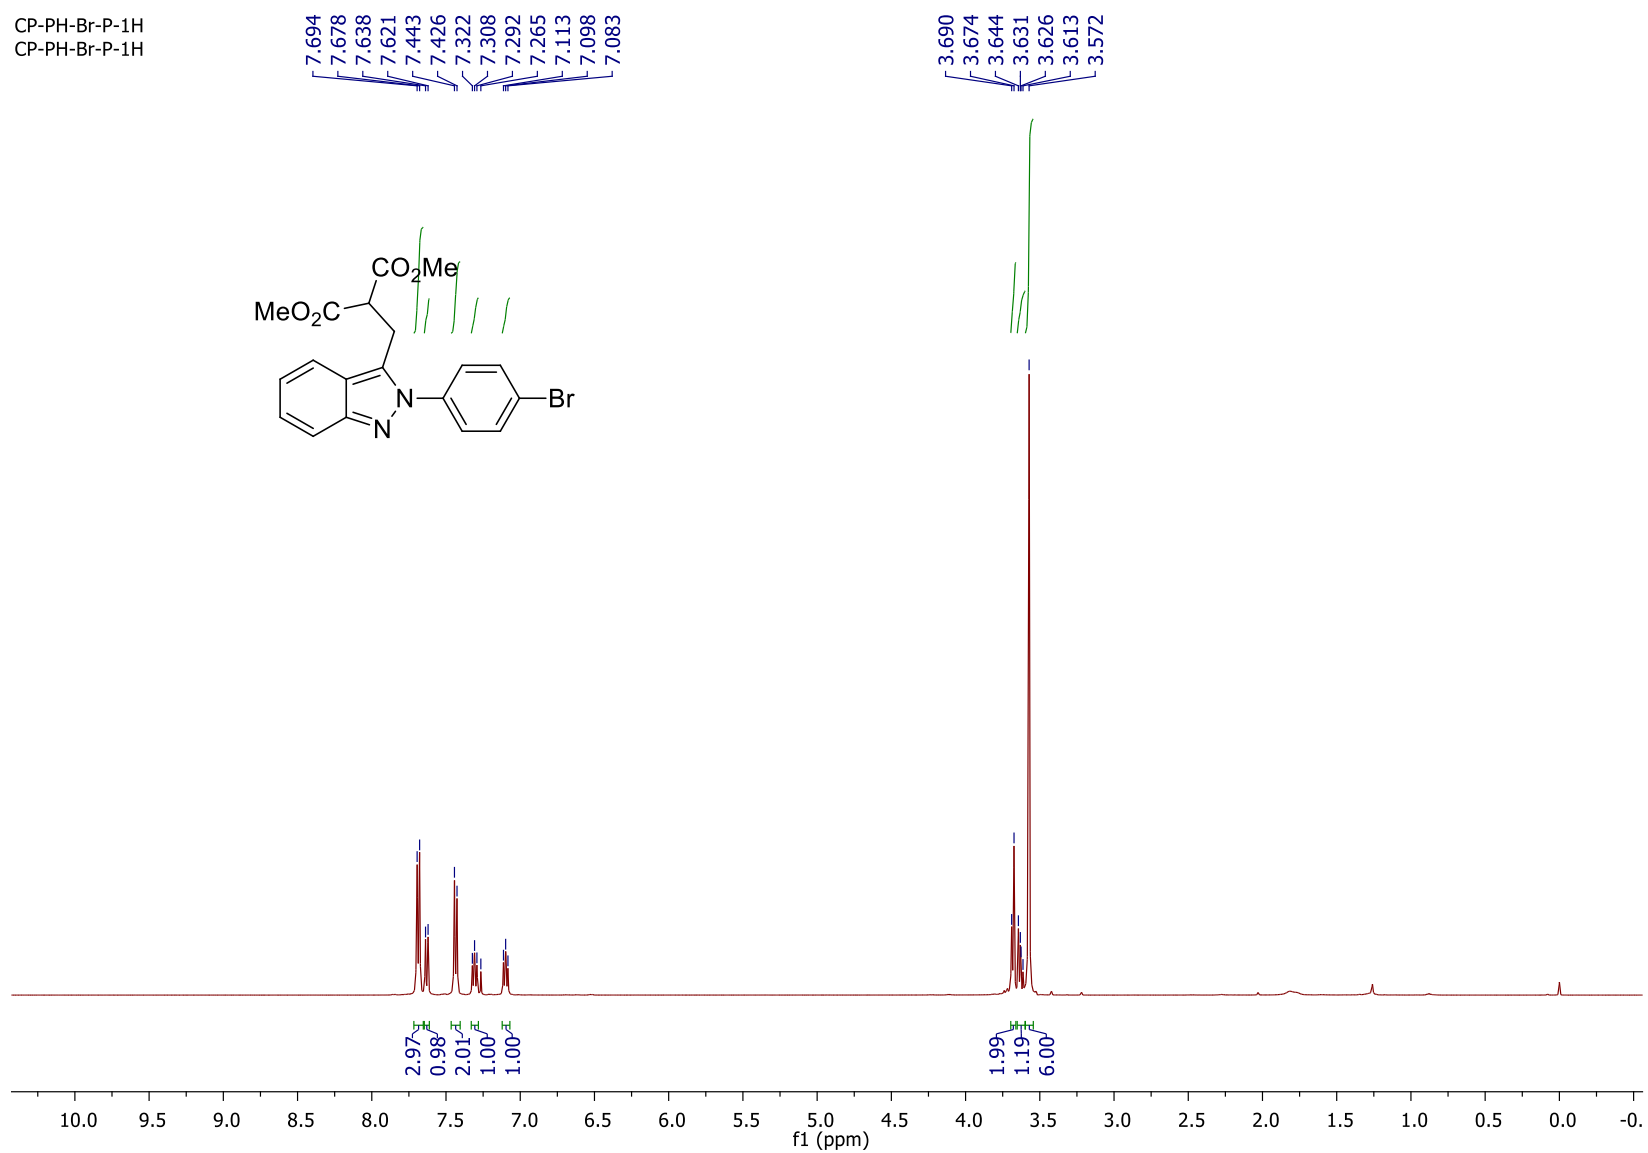

<sup>1</sup>H spectrum of compound **3an** (125 MHz, CDCl<sub>3</sub>)

CP-PH-Br-P-13C  
CP-PH-Br-P-13C

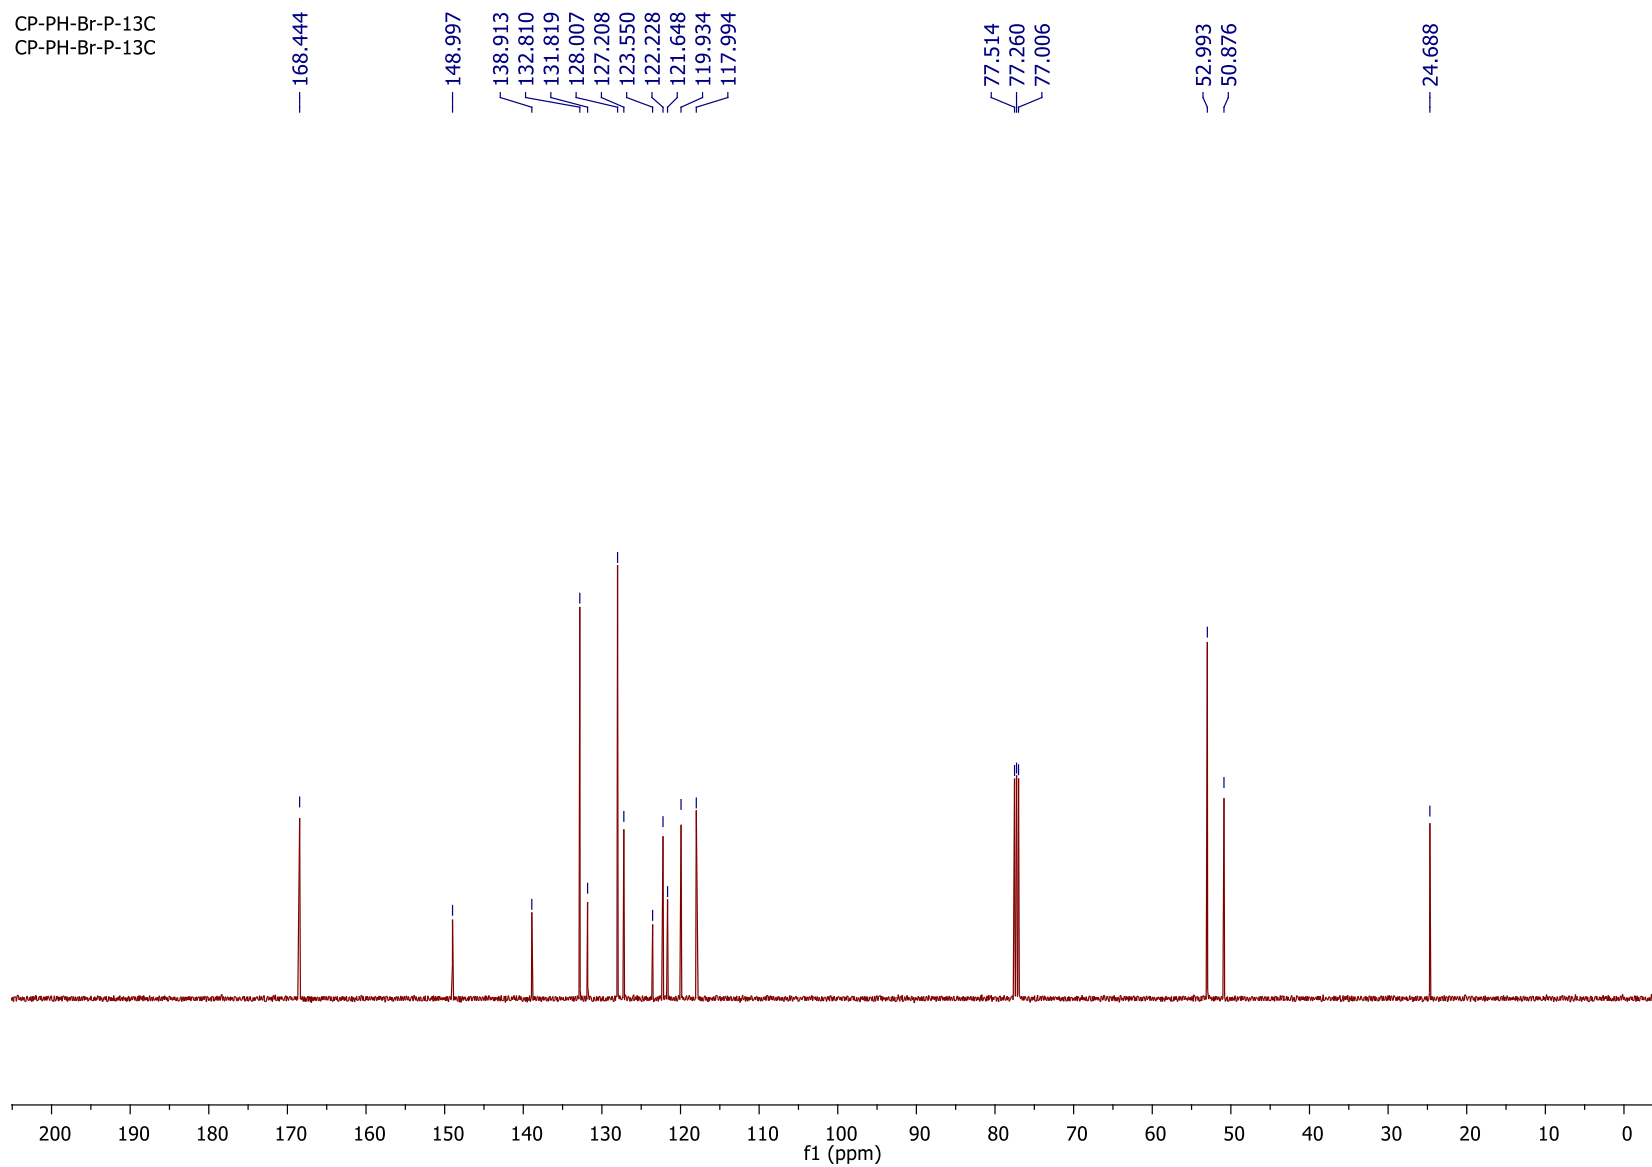

<sup>1</sup>H spectrum of compound **3ao** (400 MHz, CDCl<sub>3</sub>)

DMM-PF-1H  
DMM-PF-1H

7.727 7.705 7.673 7.652 7.571 7.559 7.554 7.549 7.543 7.537 7.359 7.341 7.319 7.296 7.284 7.275 7.253 7.150 7.132 7.112 3.704 3.698 3.682 3.659 3.644 3.635 3.620 3.605

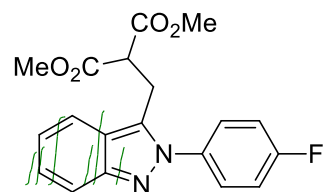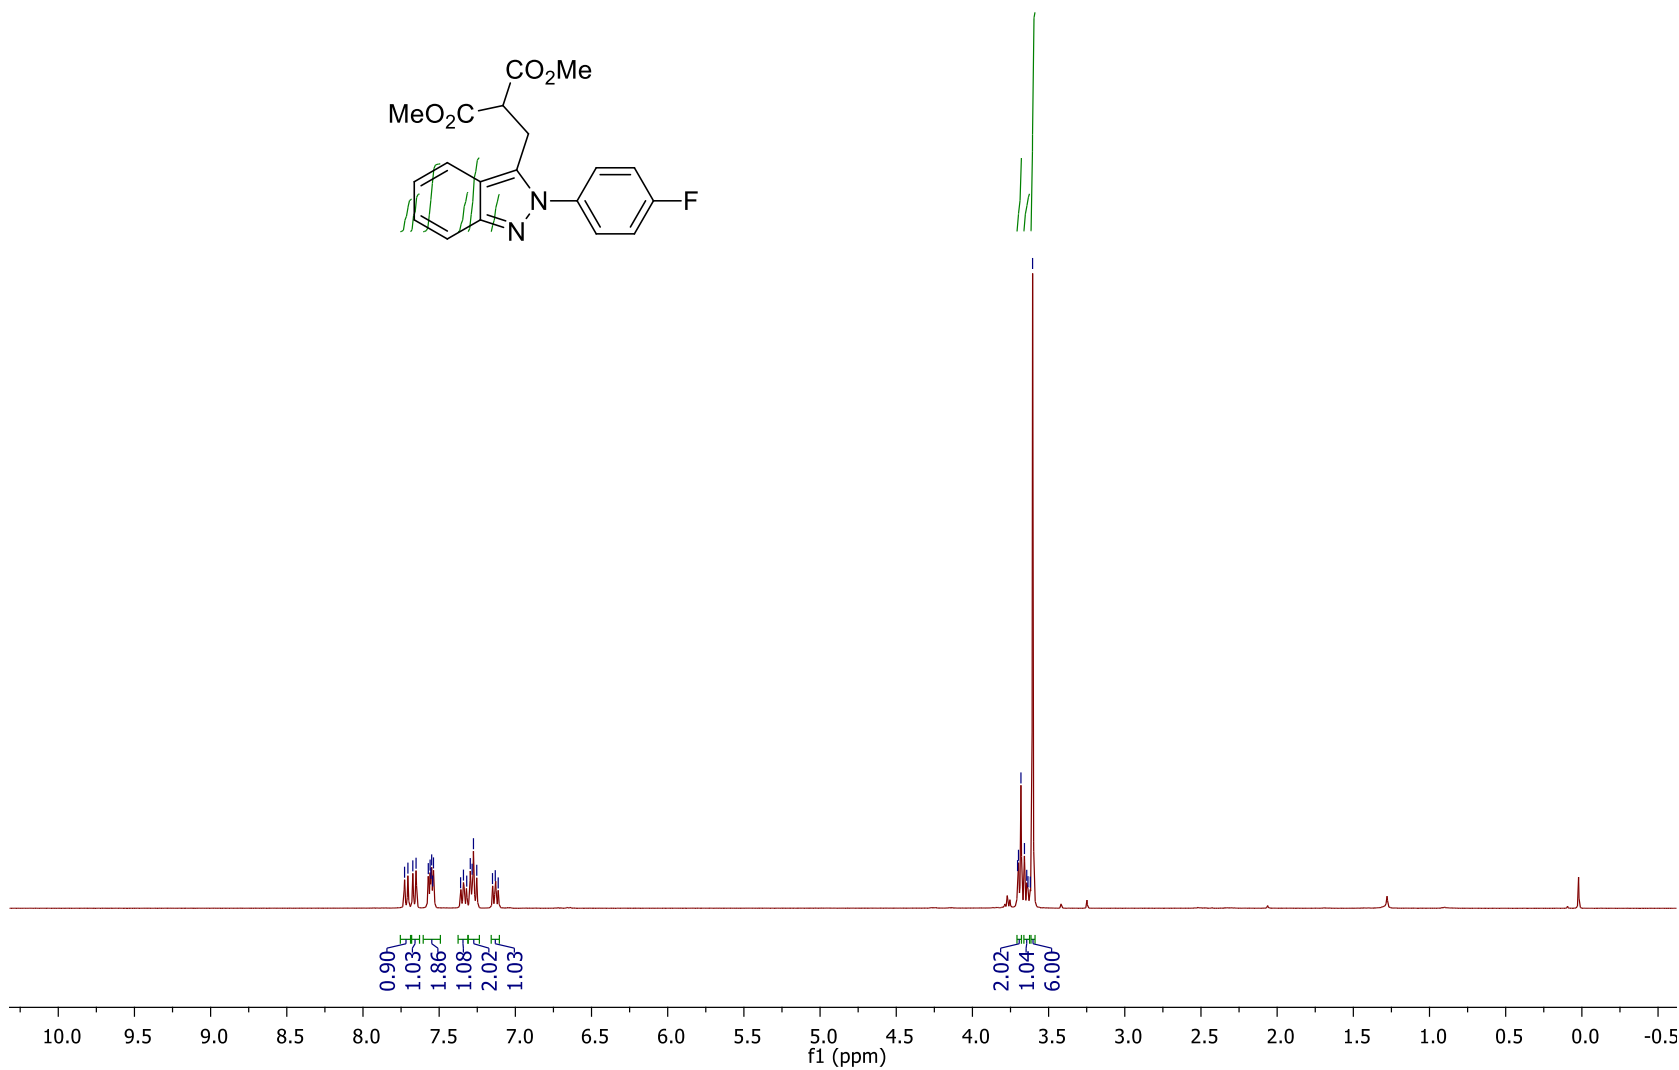

$^{13}\text{C}$  spectrum of compound **3ao** (125 MHz,  $\text{CDCl}_3$ )

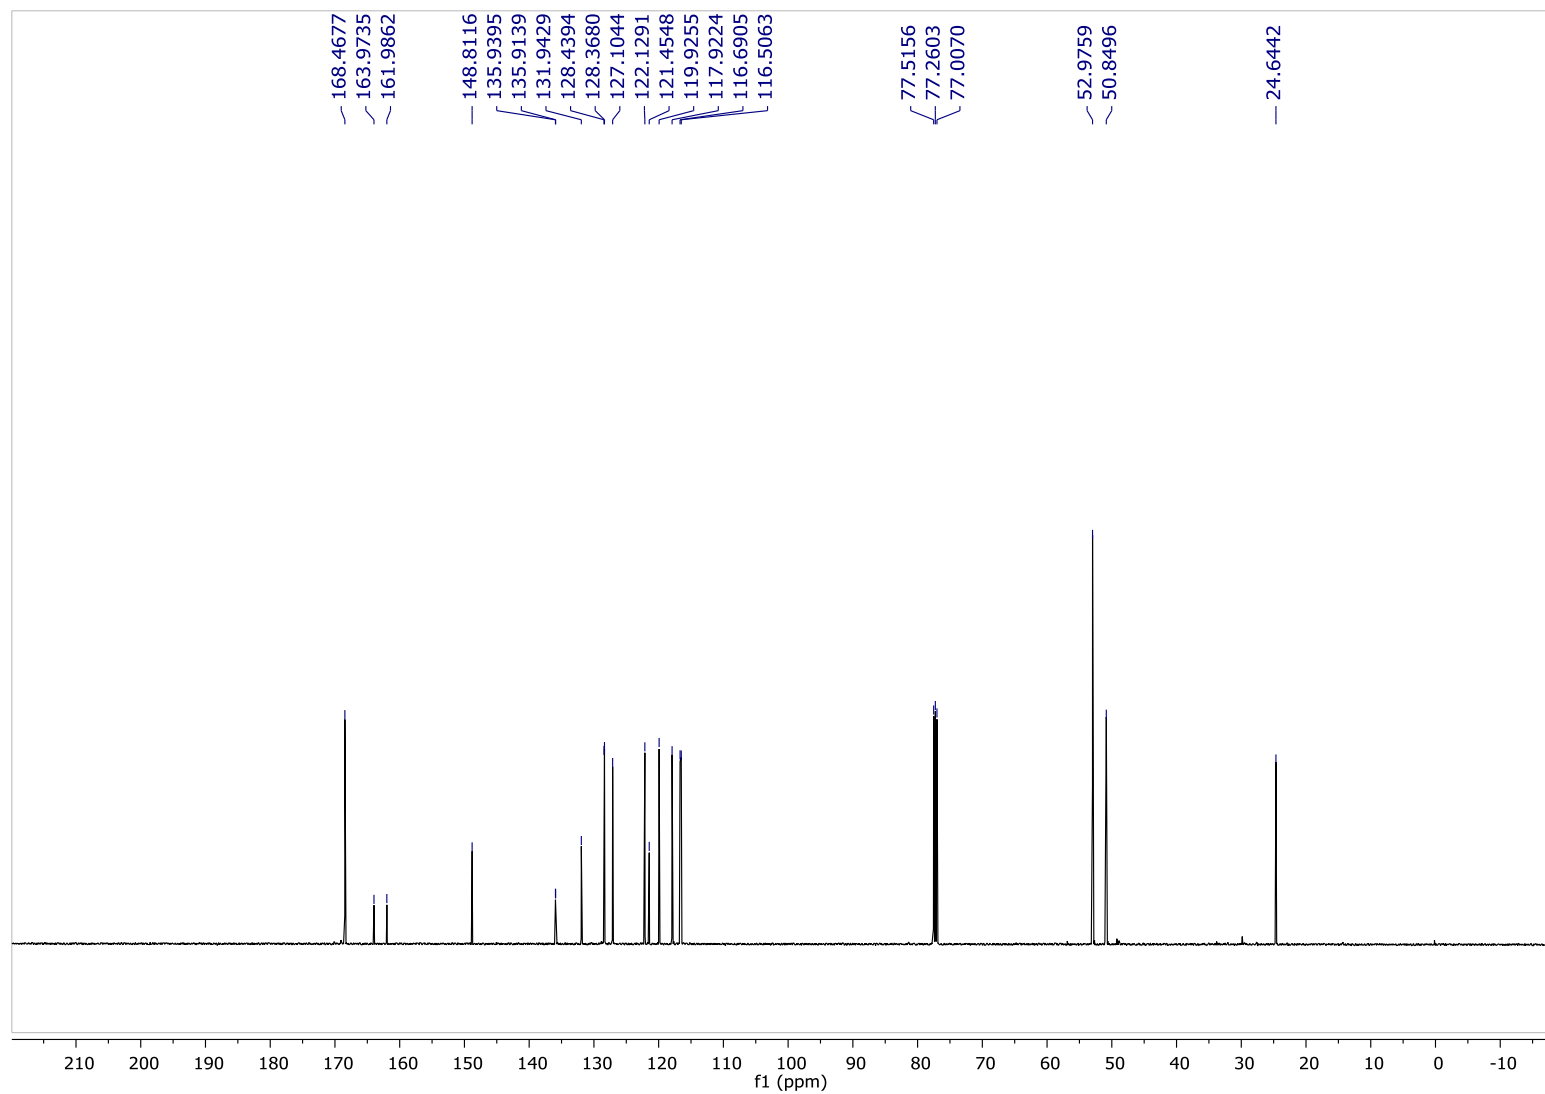

$^{19}\text{F}$  spectrum of compound **3ao** (471 MHz,  $\text{CDCl}_3$ )

DMM-PF-P-19F  
DMM-PF-P-19F

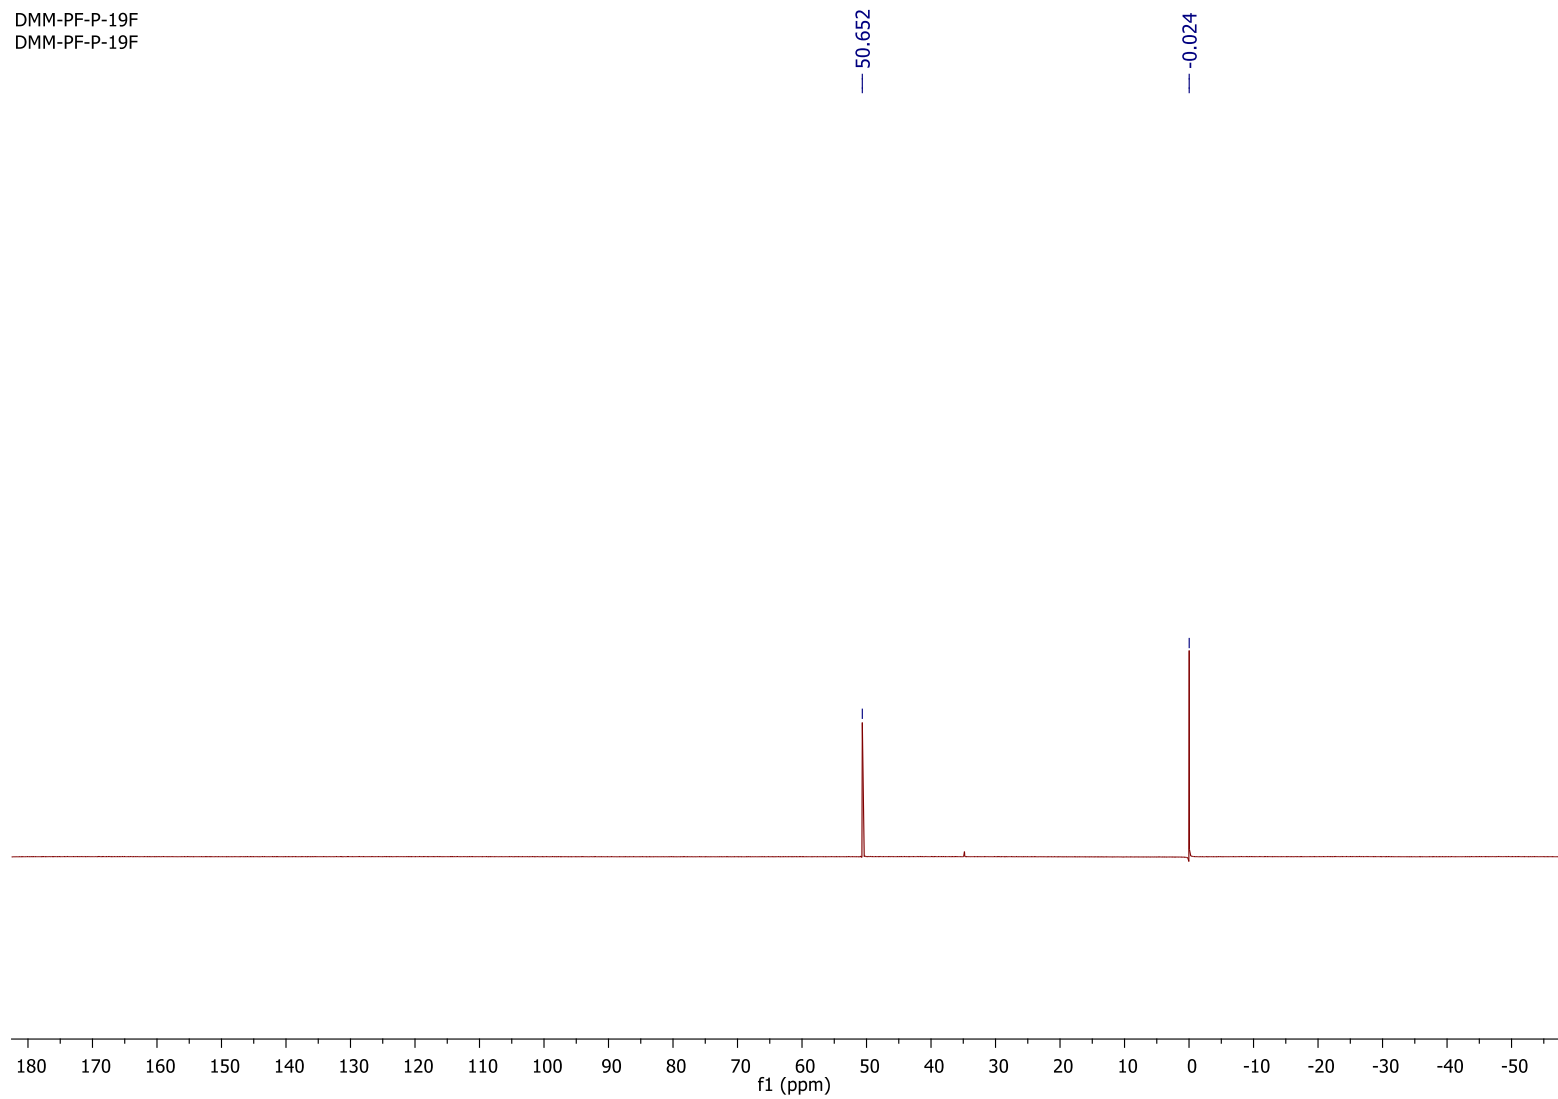

<sup>1</sup>H spectrum of compound **3ap** (400 MHz, CDCl<sub>3</sub>)

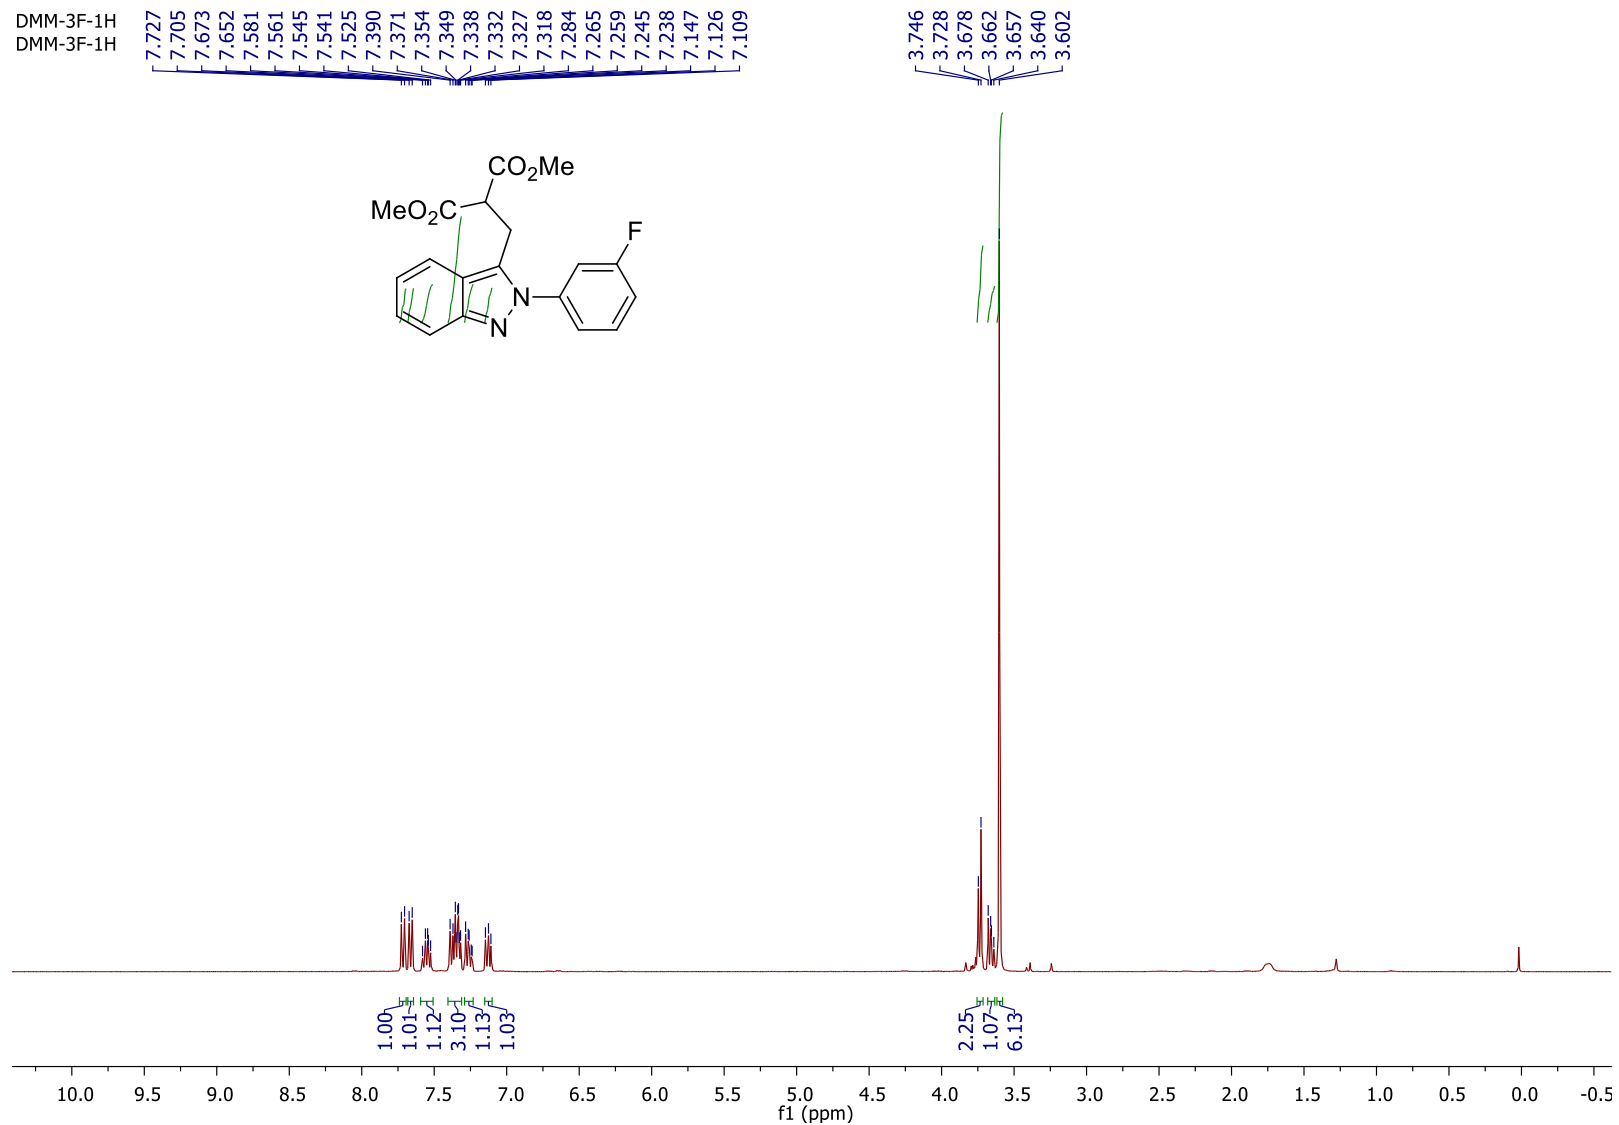

$^{13}\text{C}$  spectrum of compound **3ap** (100 MHz,  $\text{CDCl}_3$ )

DMM-3F-13C  
DMM-3F-13C

168.502  
164.163  
161.685  
149.008  
141.245  
141.147  
131.905  
130.955  
130.866  
127.301  
122.314  
122.215  
122.182  
121.667  
120.003  
118.057  
116.770  
116.562  
114.476  
114.235  
77.578  
77.260  
76.942  
53.020  
50.934  
24.709

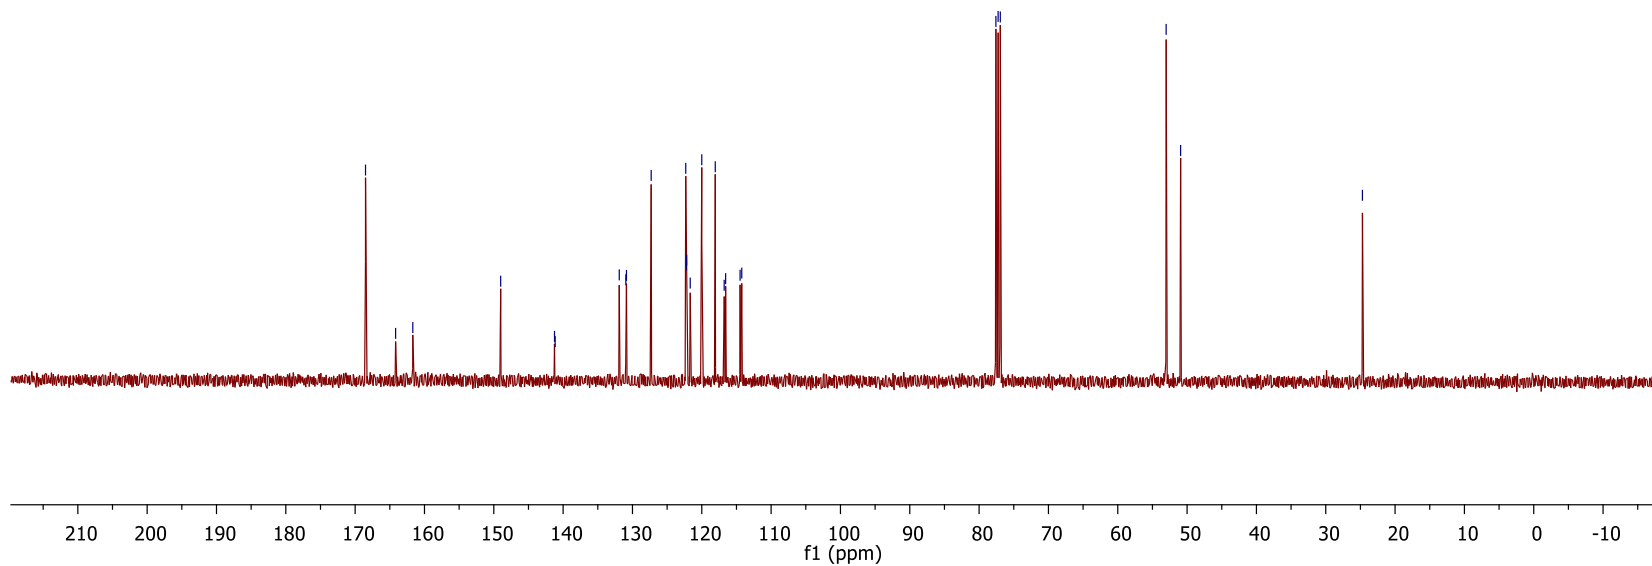

$^{19}\text{F}$  spectrum of compound **3ap** (371 MHz,  $\text{C}_6\text{F}_6/\text{CDCl}_3$ )

DMM-3F-19F  
DMM-3F-19F

— 51.540

— -0.000

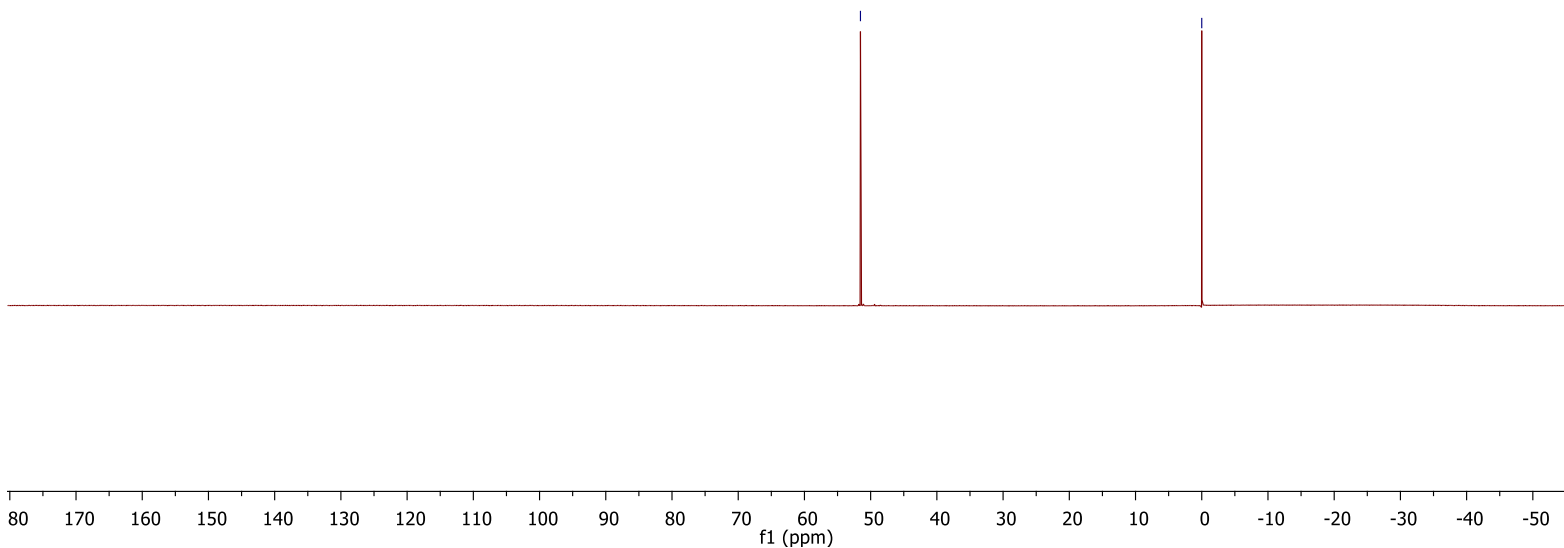



<sup>1</sup>H spectrum of compound **3aq** (400 MHz, CDCl<sub>3</sub>)

DMM-MCF3-1H  
DMM-MCF3-1H

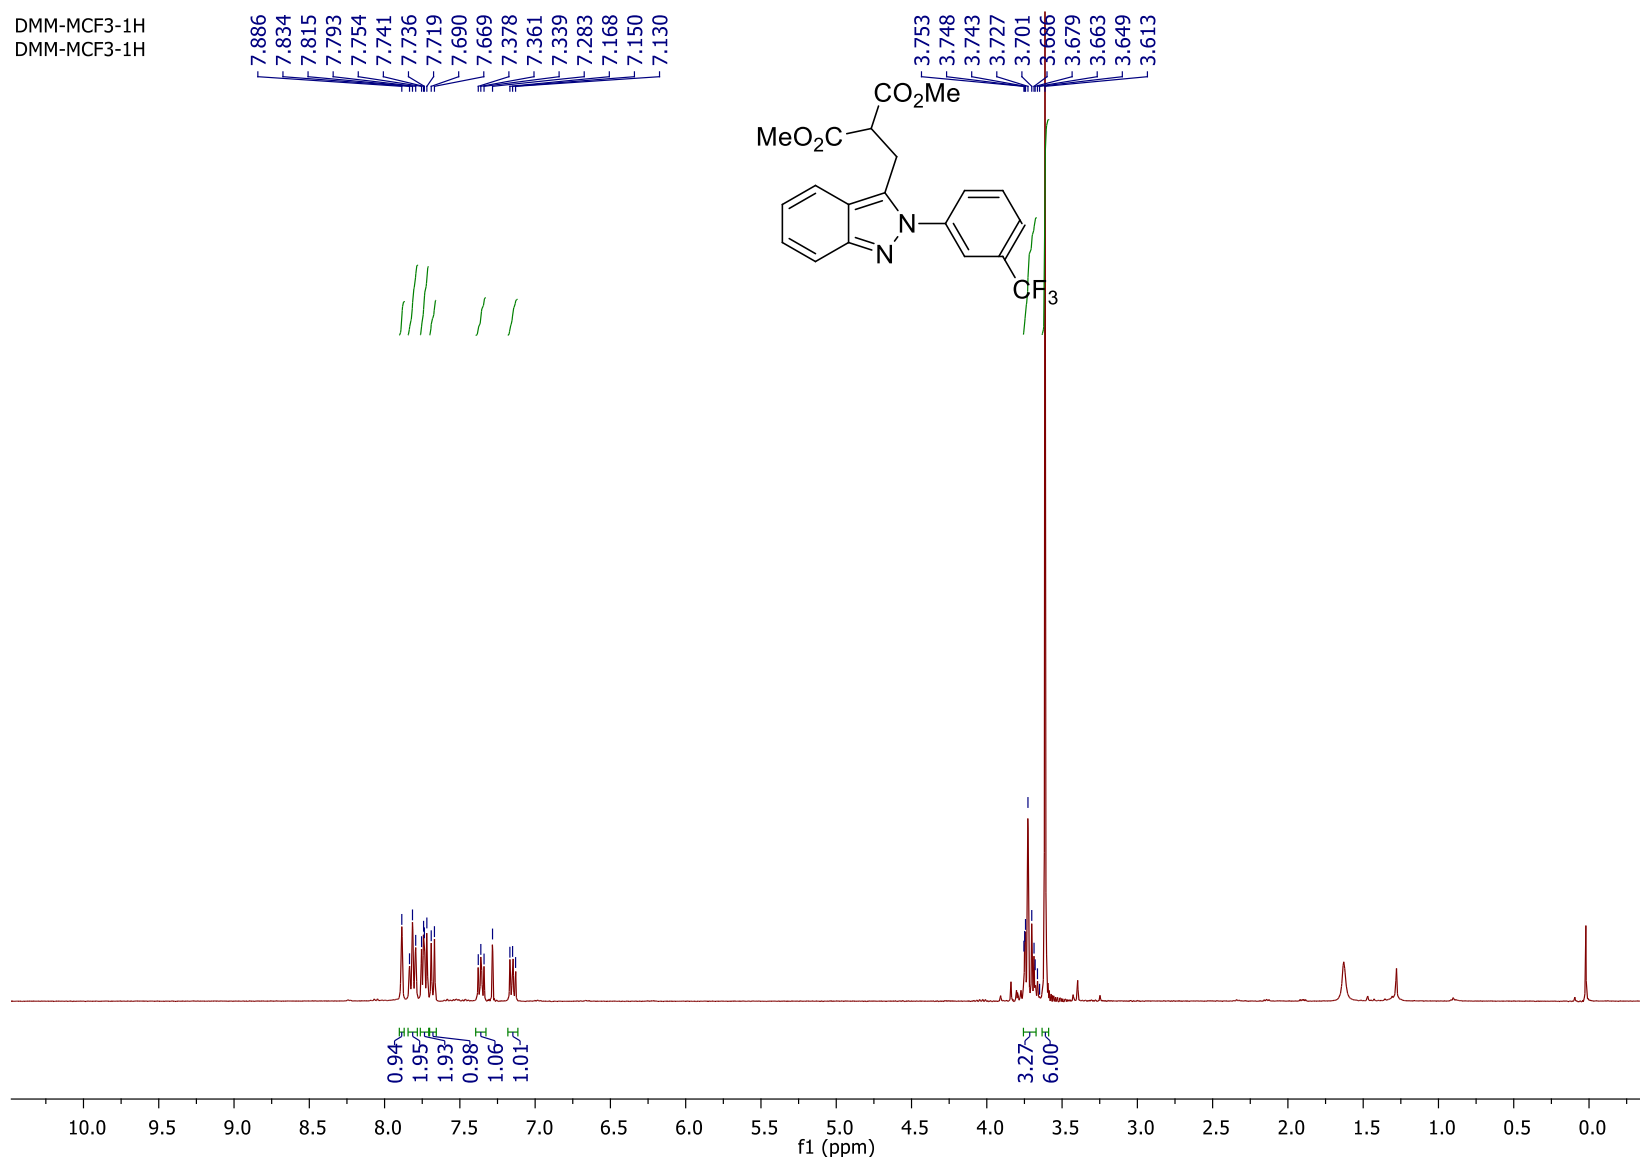

<sup>13</sup>C spectrum of compound **3aq** (100 MHz, CDCl<sub>3</sub>)

DMM-CF3-1-13C  
DMM-CF3-1-13C

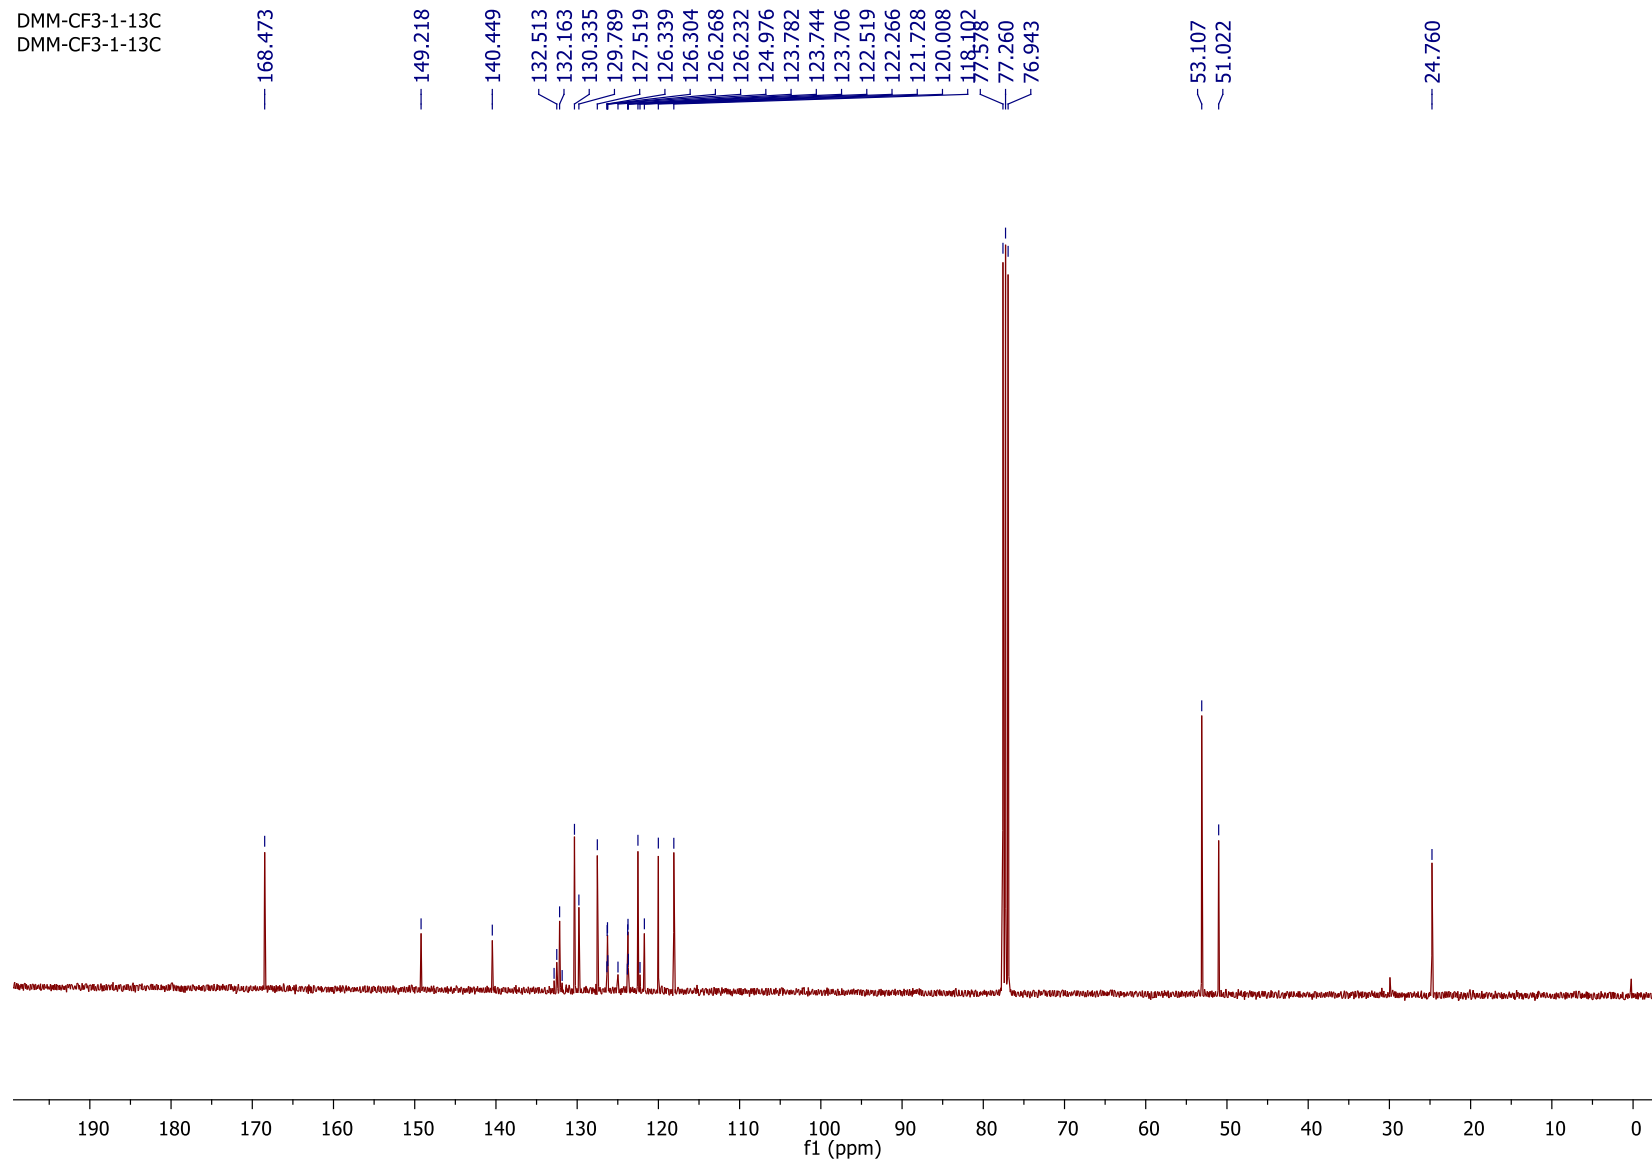

$^{19}\text{F}$  spectrum of compound **3aq** (471 MHz,  $\text{C}_6\text{F}_6/\text{CDCl}_3$ )

DMM-MCF3-19F  
DMM-MCF3-19F

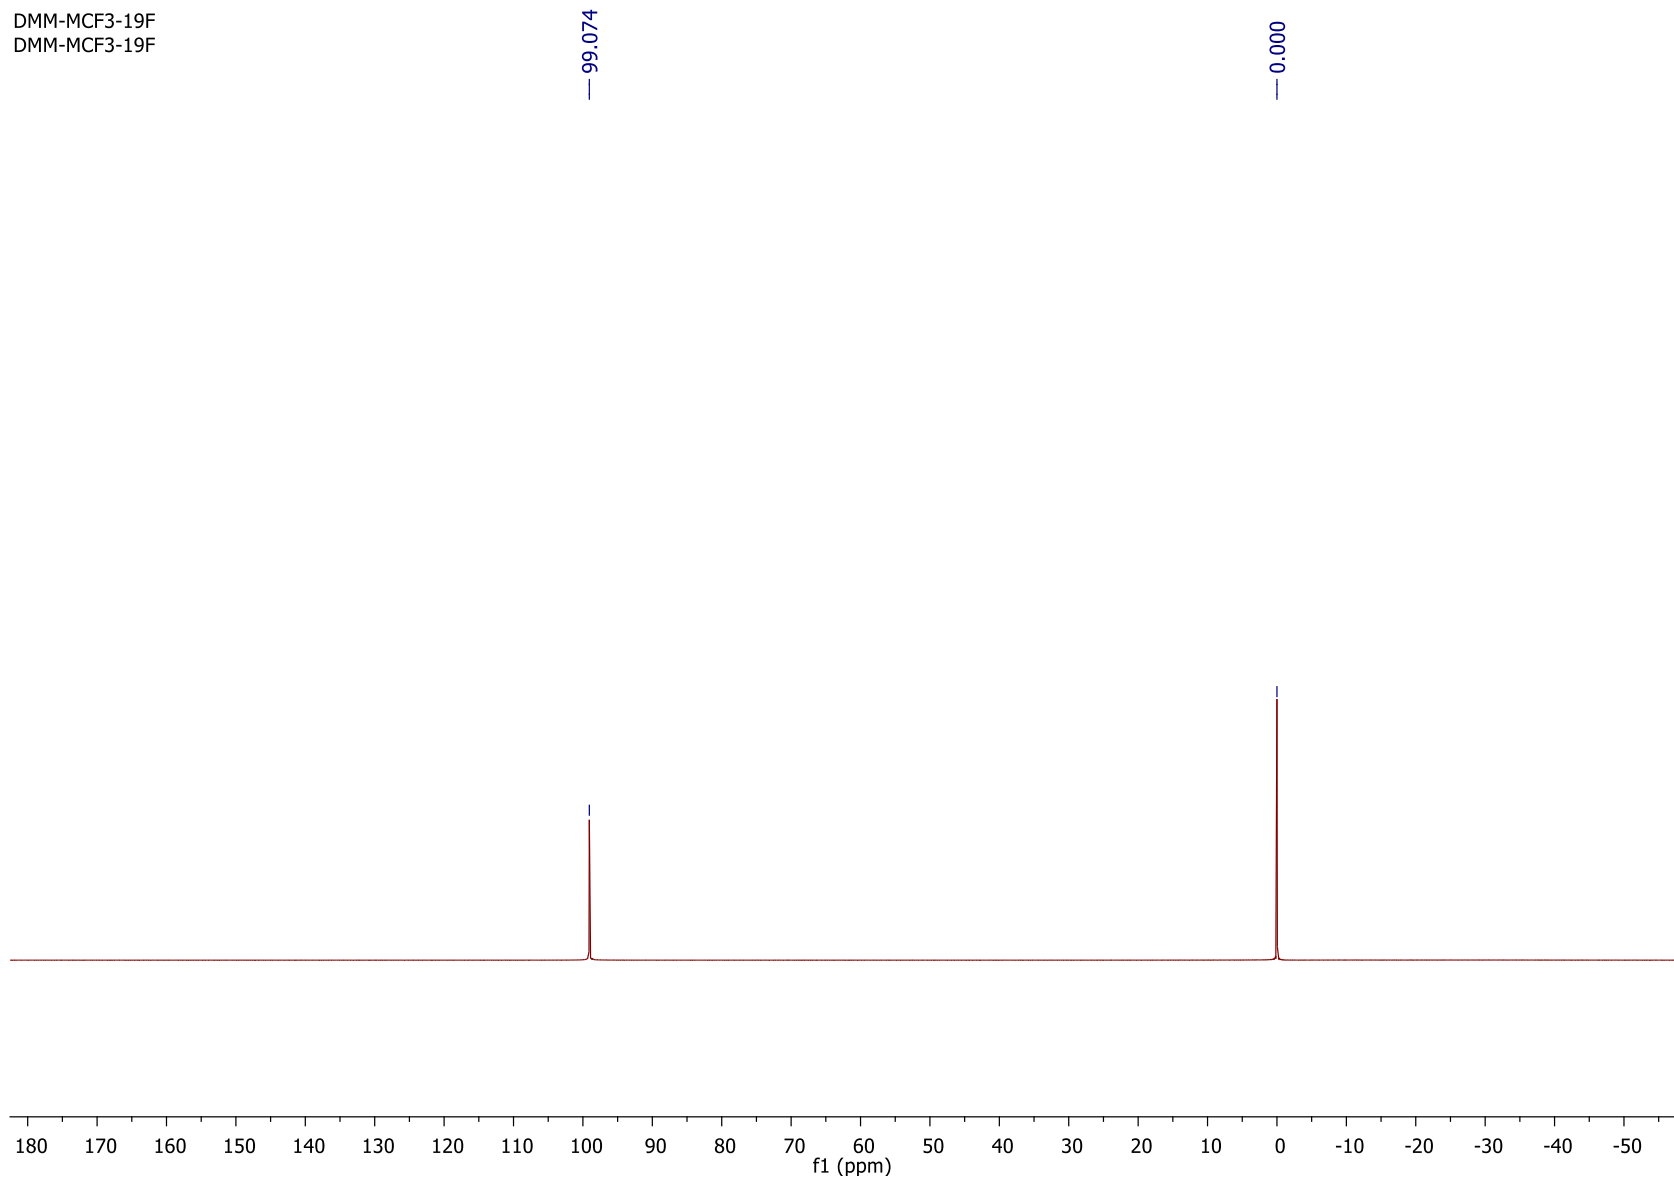

<sup>1</sup>H spectrum of compound **3ar** (400 MHz, CDCl<sub>3</sub>)

cpdmm-pco2me-p-1H  
cpdmm-pco2me-p-1H

8.269  
8.248  
7.729  
7.707  
7.685  
7.665  
7.649  
7.355  
7.338  
7.317  
7.282  
7.145  
7.126  
7.107

3.988  
3.758  
3.738  
3.643  
3.624  
3.603  
3.580

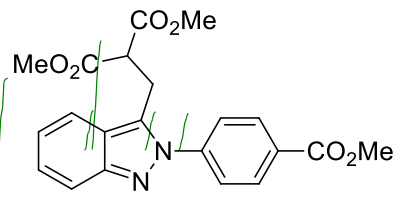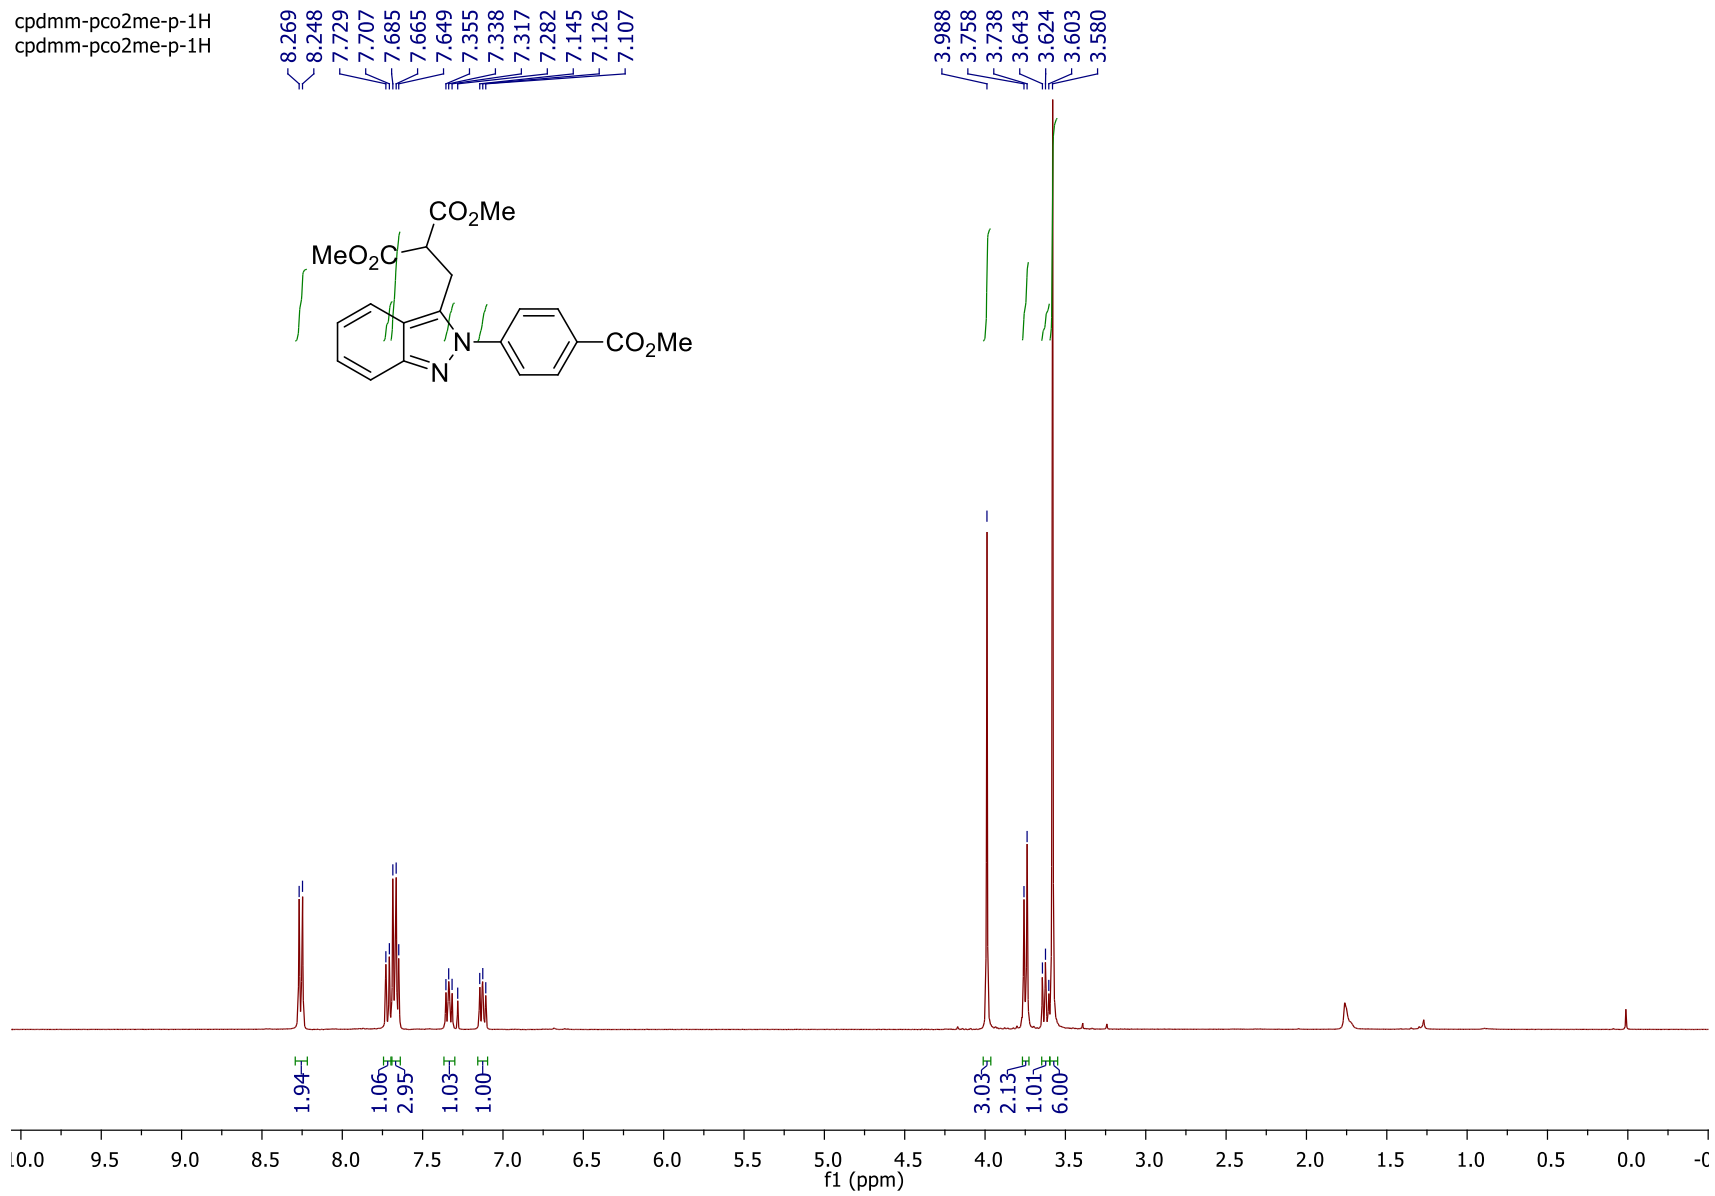

<sup>13</sup>C spectrum of compound **3ar** (100 MHz, CDCl<sub>3</sub>)

cpdmm-pco2me-p--13C  
cpdmm-pco2me-p--13C

168.437  
166.265

149.193

143.557

131.912

131.056

131.014

127.392

126.344

122.387

121.886

119.994

118.079

77.578

77.260

76.942

53.027

52.670

50.919

24.763

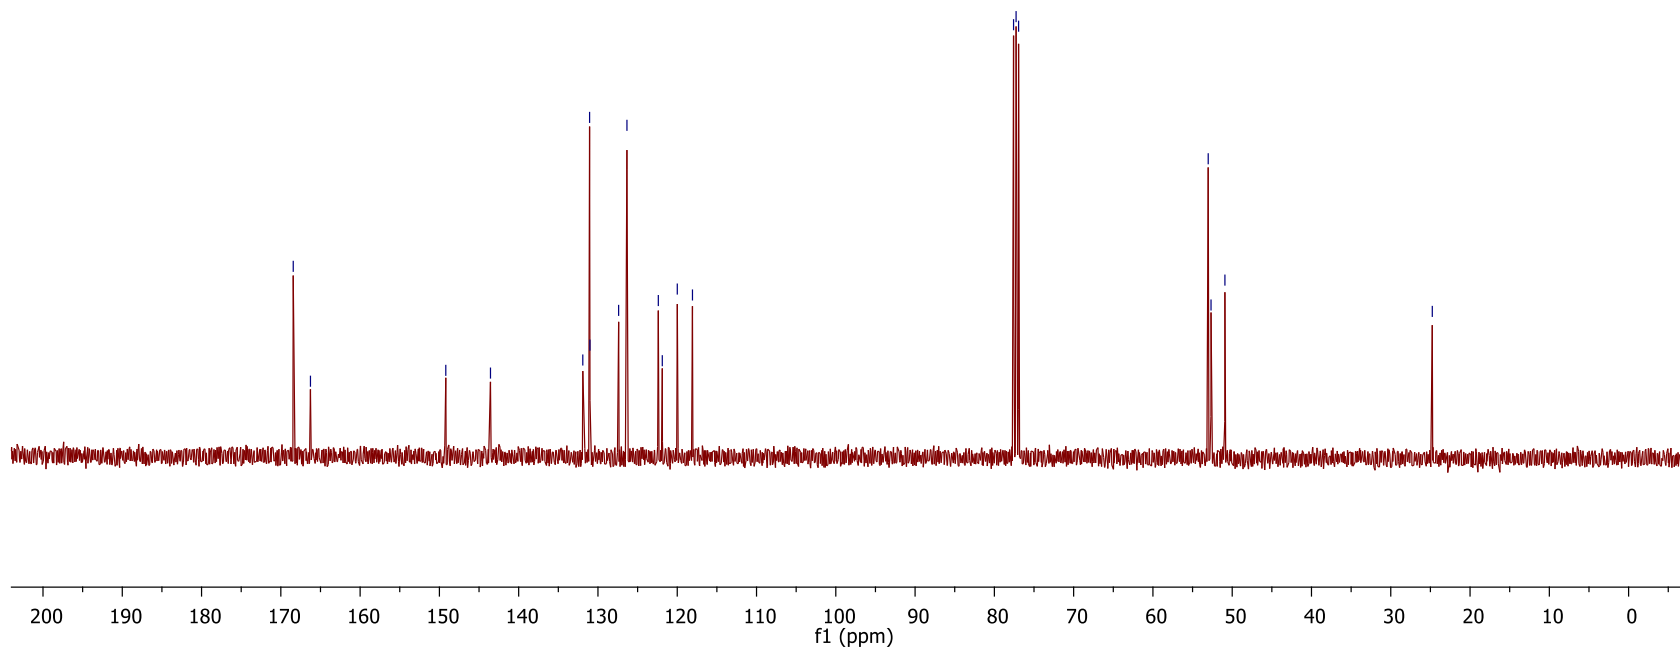

<sup>1</sup>H spectrum of compound **3ba** (400 MHz, CDCl<sub>3</sub>)

4BR-PH-P-1H  
4BR-PH-P-1H

7.885  
7.578  
7.559  
7.553  
7.544  
7.531  
7.517  
7.511  
7.266  
7.192  
7.172

3.679  
3.659  
3.577  
3.562  
3.542  
3.523

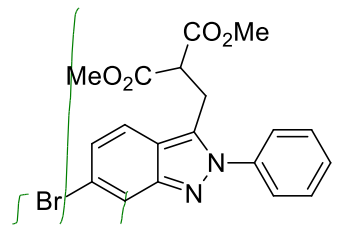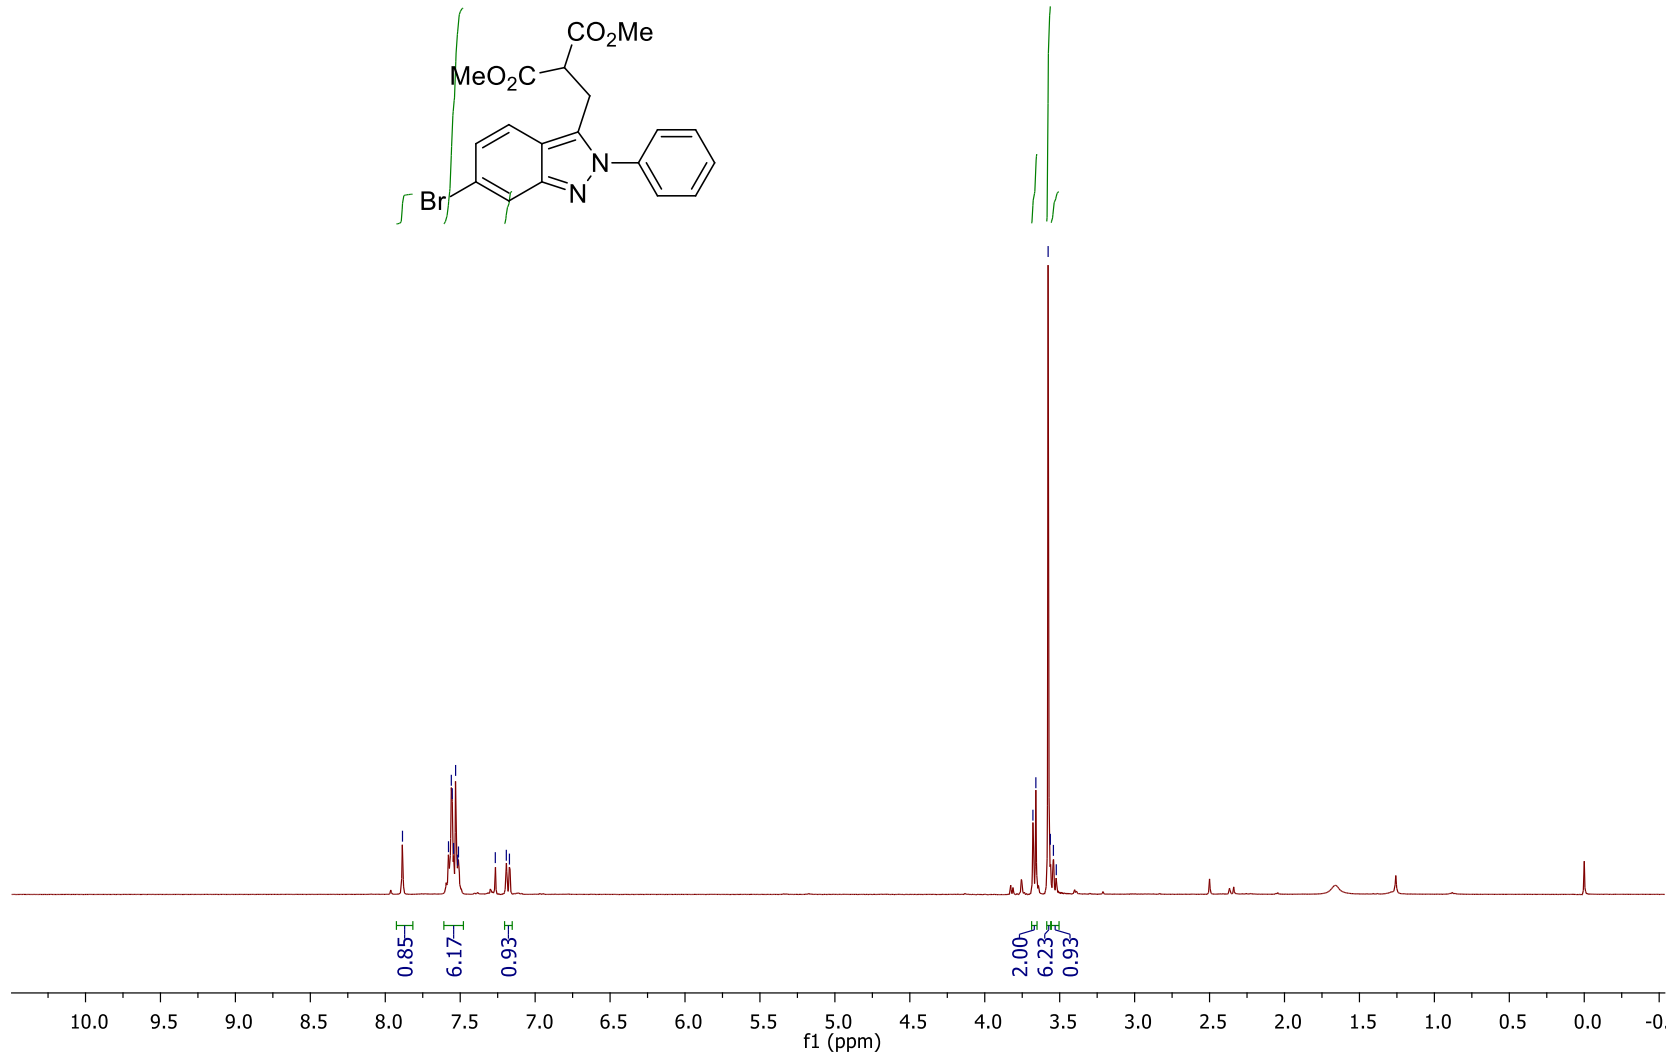

$^{13}\text{C}$  spectrum of compound **3ba** (100 MHz,  $\text{CDCl}_3$ )

4BR-PH-P-13C  
4BR-PH-P-13C

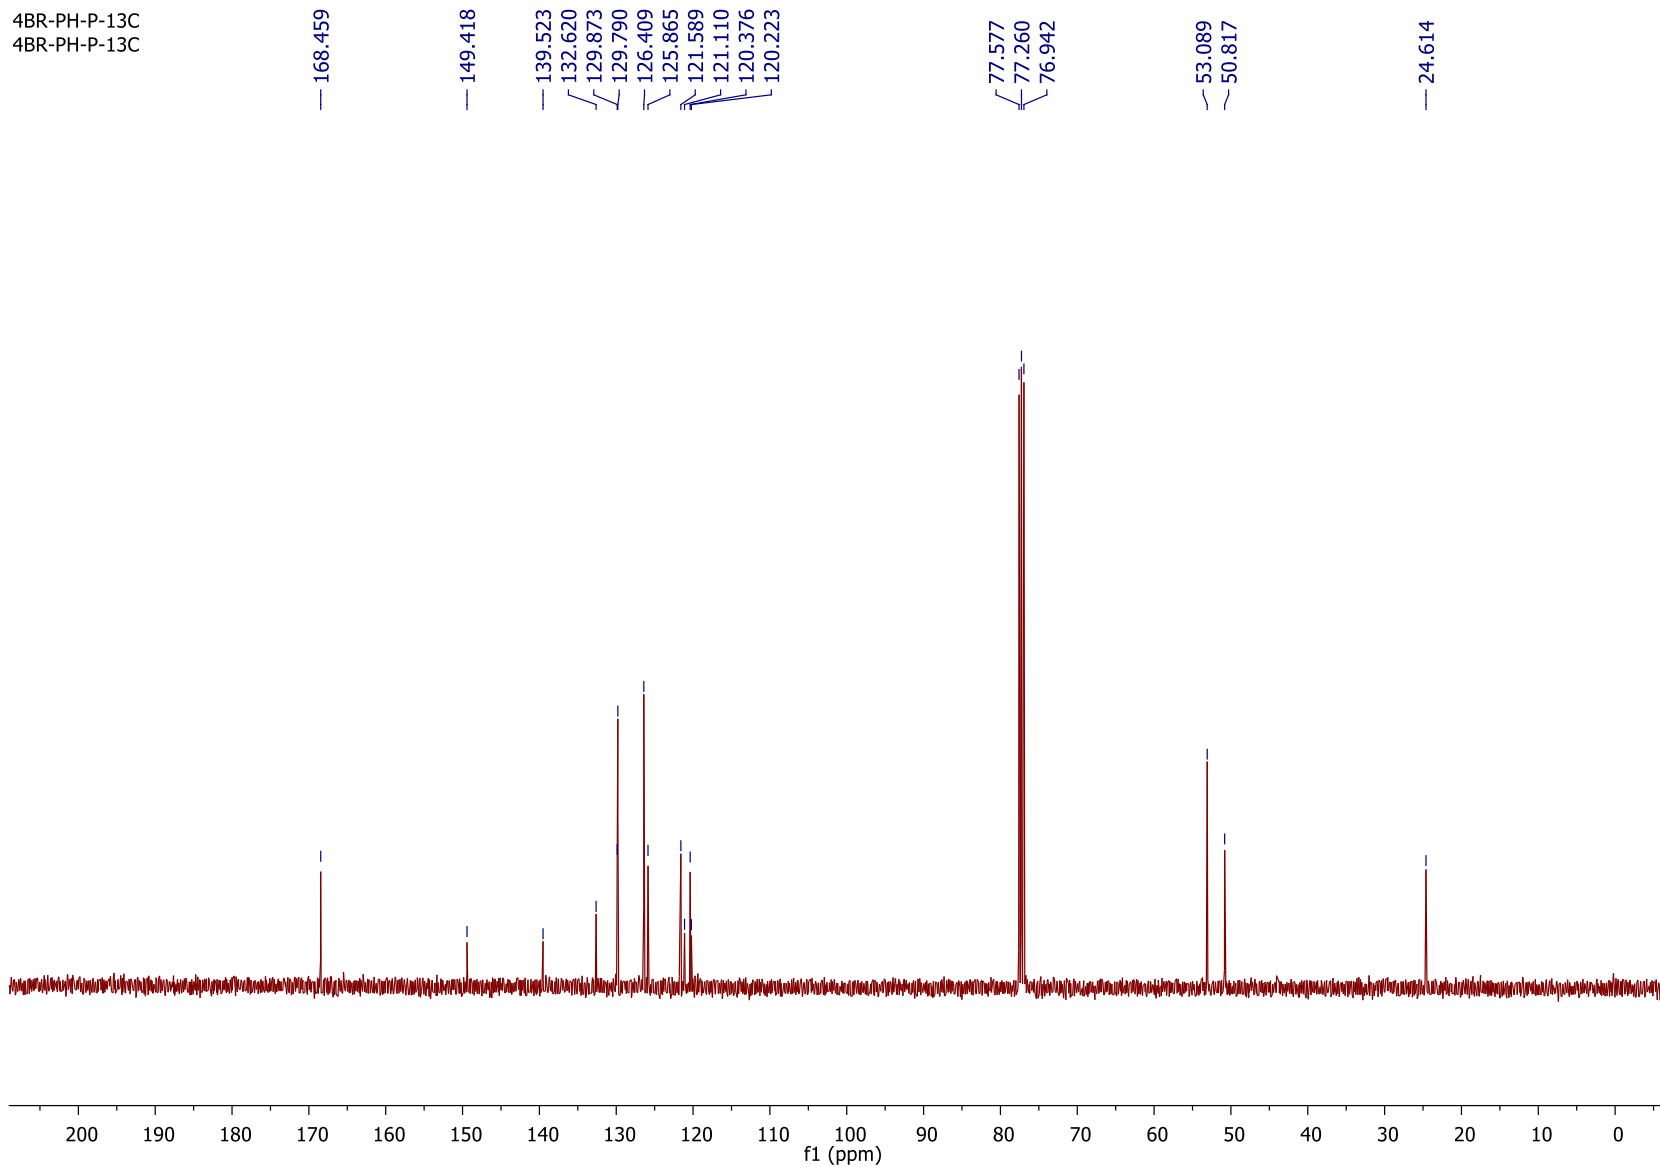

<sup>1</sup>H spectrum of compound **3ca** (400 MHz, CDCl<sub>3</sub>)

CL-P-1H  
CL-P-1H

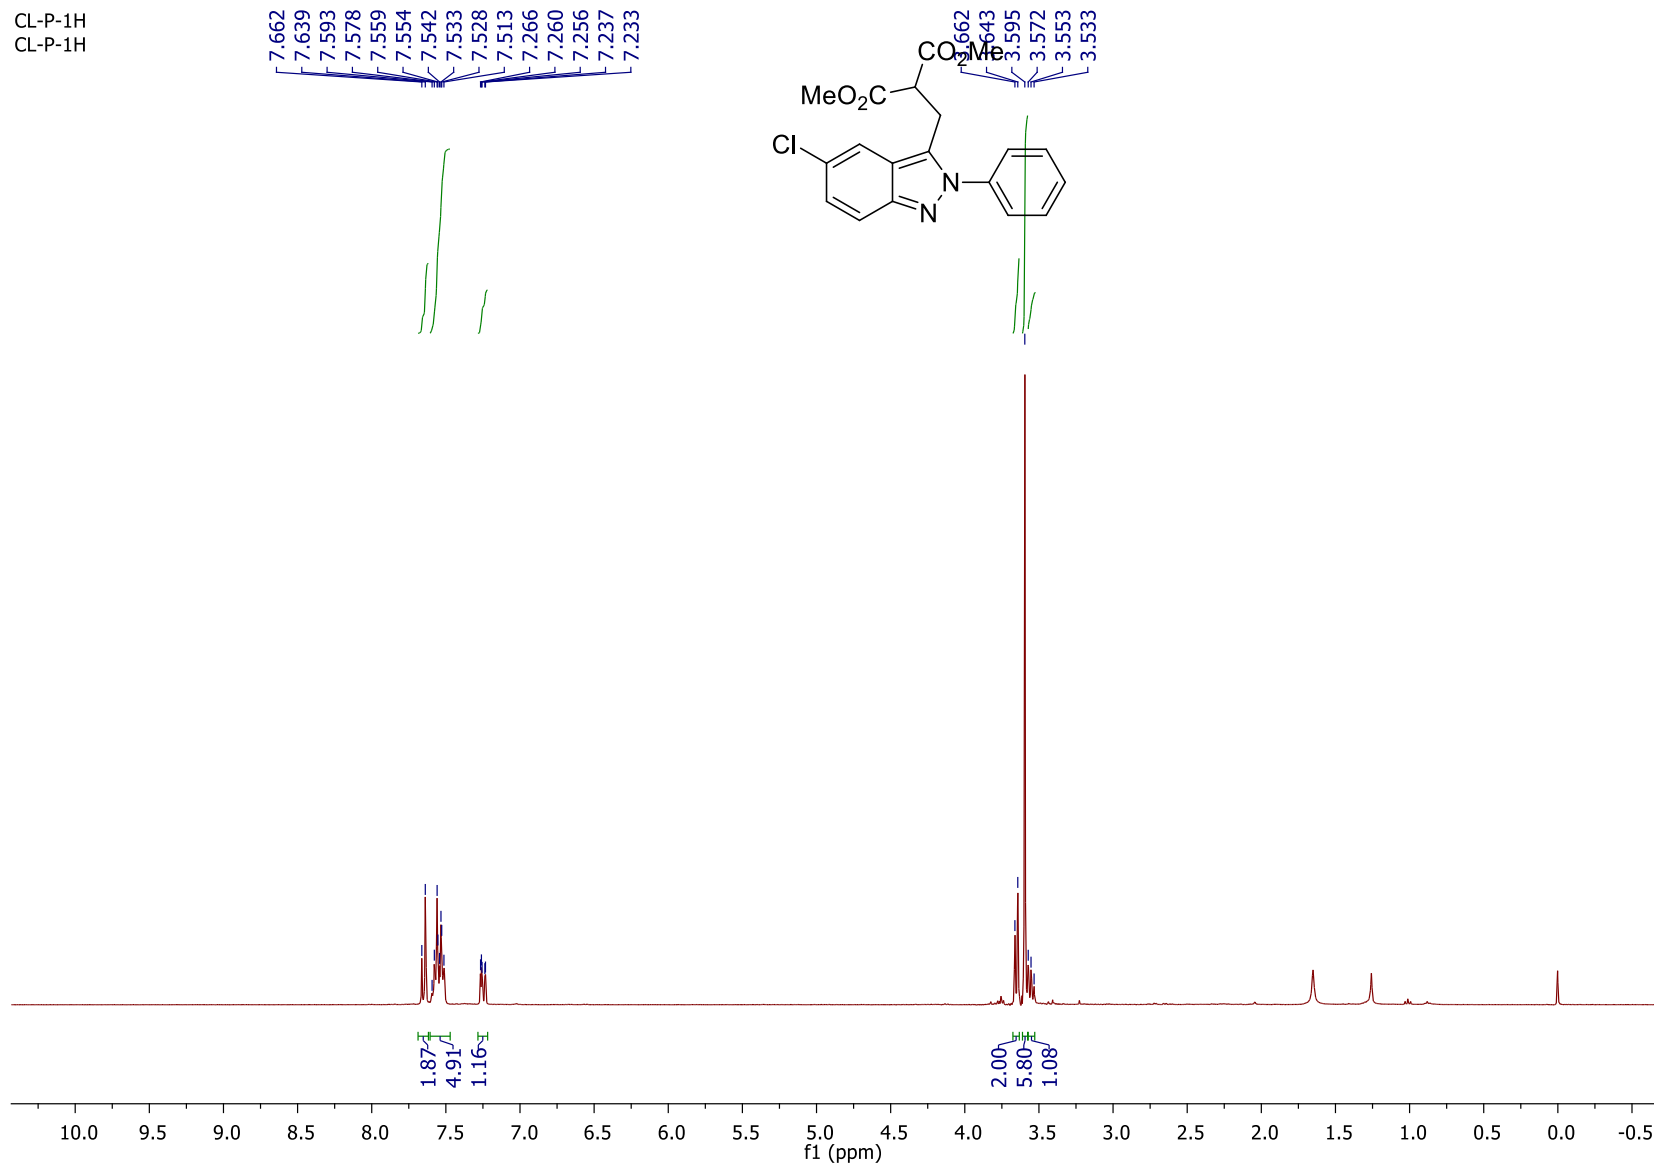

S80



<sup>13</sup>C spectrum of compound **3ca** (100 MHz, CDCl<sub>3</sub>)

CL-P-13C  
CL-P-13C

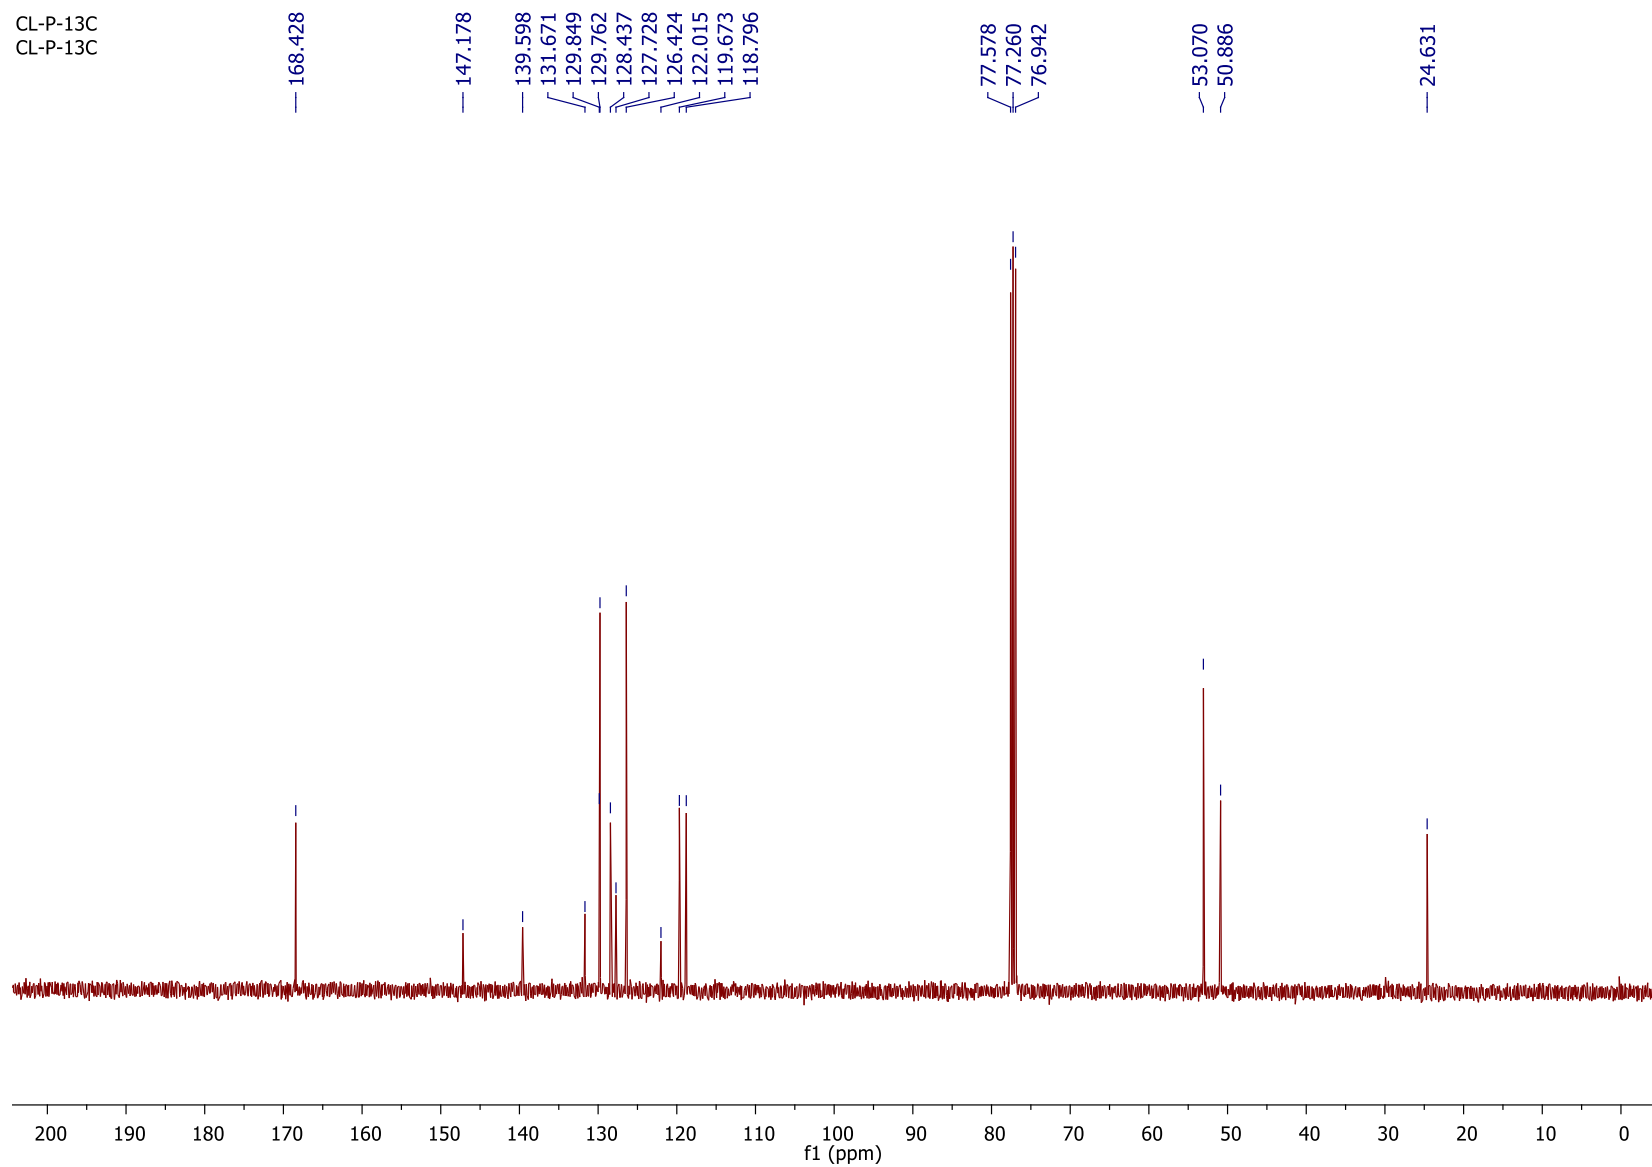

S81

<sup>1</sup>H spectrum of compound **3da** (400 MHz, CDCl<sub>3</sub>)

OME-2-1H  
OME-2-1H

7.581 7.577 7.563 7.558 7.545 7.531 7.518 7.513 7.508 7.498 7.491 7.283 6.983 6.852  
3.972 3.967 3.658 3.638 3.592 3.543 3.525 3.504

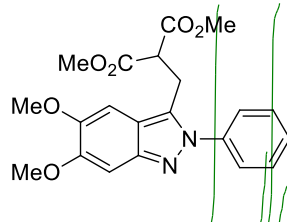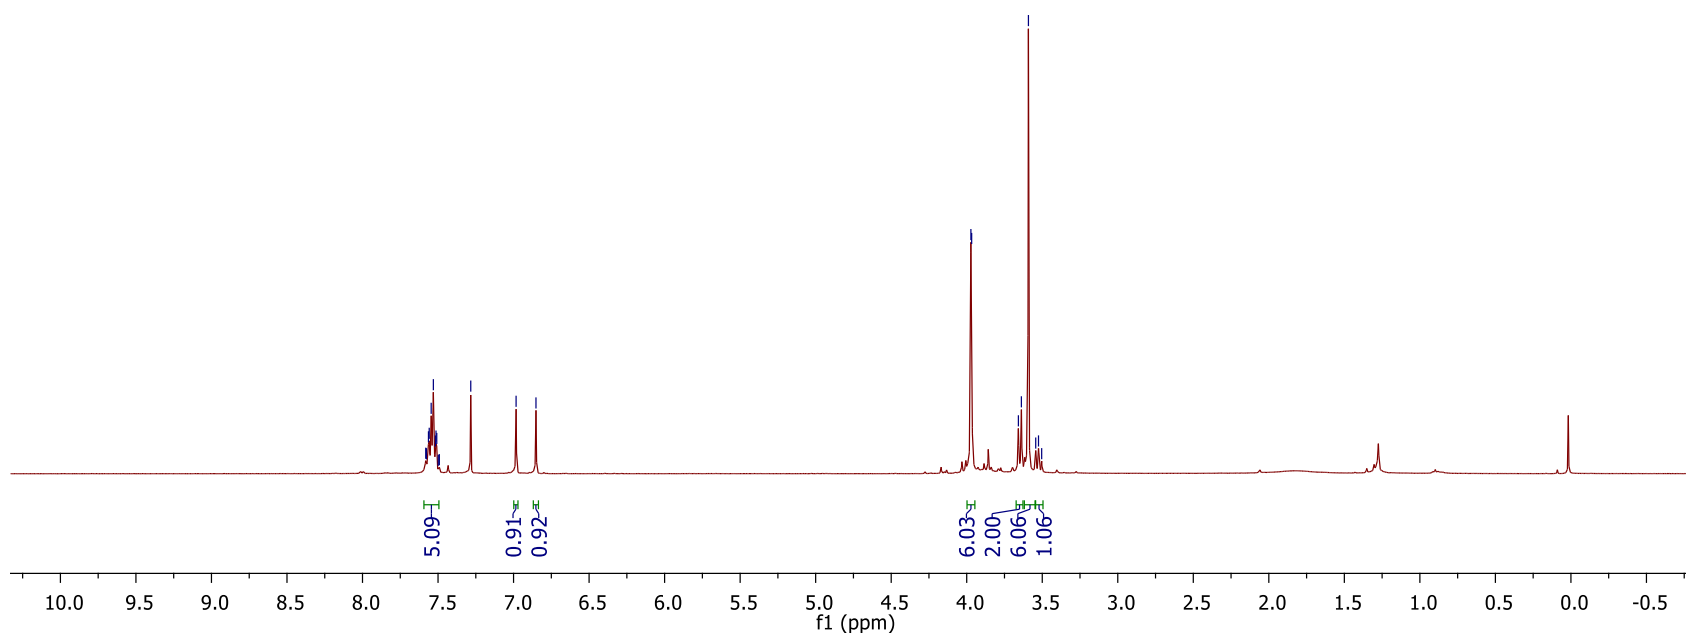

S82

<sup>13</sup>C spectrum of compound **3da** (100 MHz, CDCl<sub>3</sub>)

OME2-PH-2R-13C  
OME2-PH-2R-13C

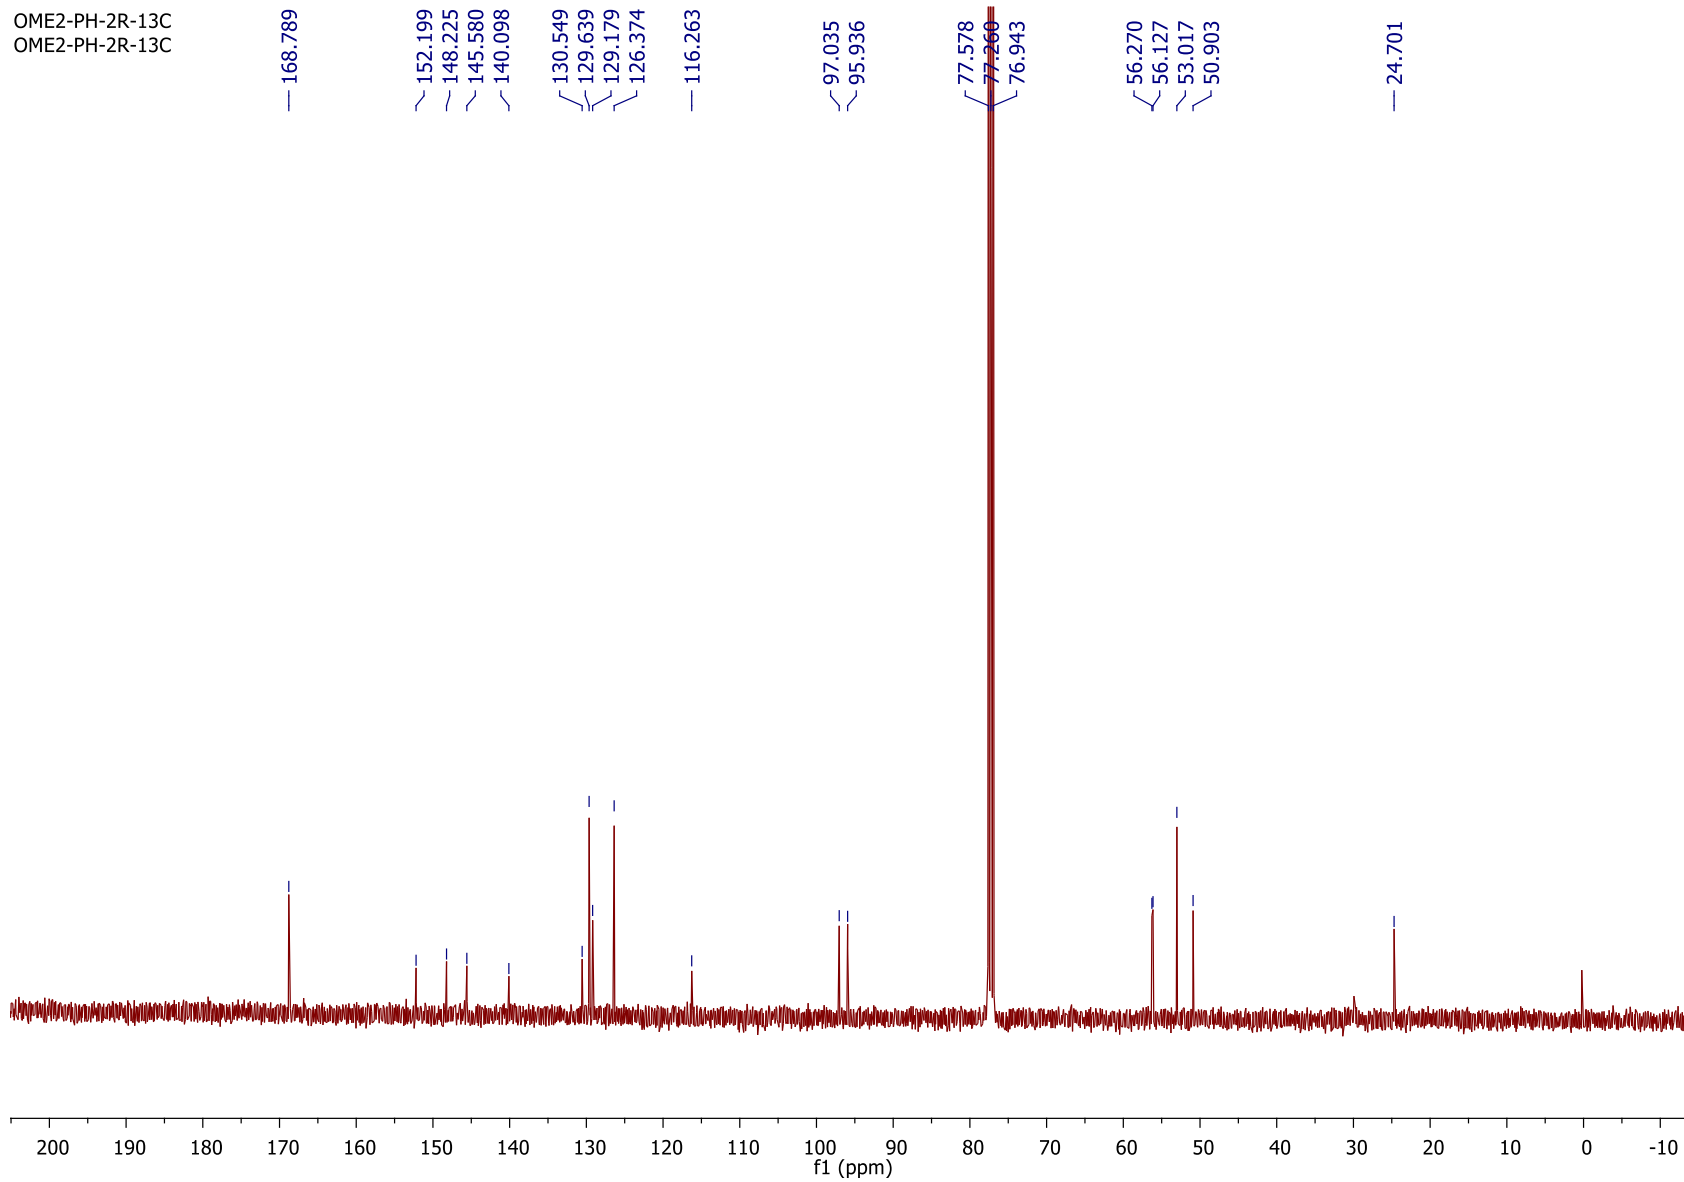

<sup>1</sup>H spectrum of compound **3ef** (500 MHz, CDCl<sub>3</sub>)

OME-POME-P-1H  
OME-POME-P-1H

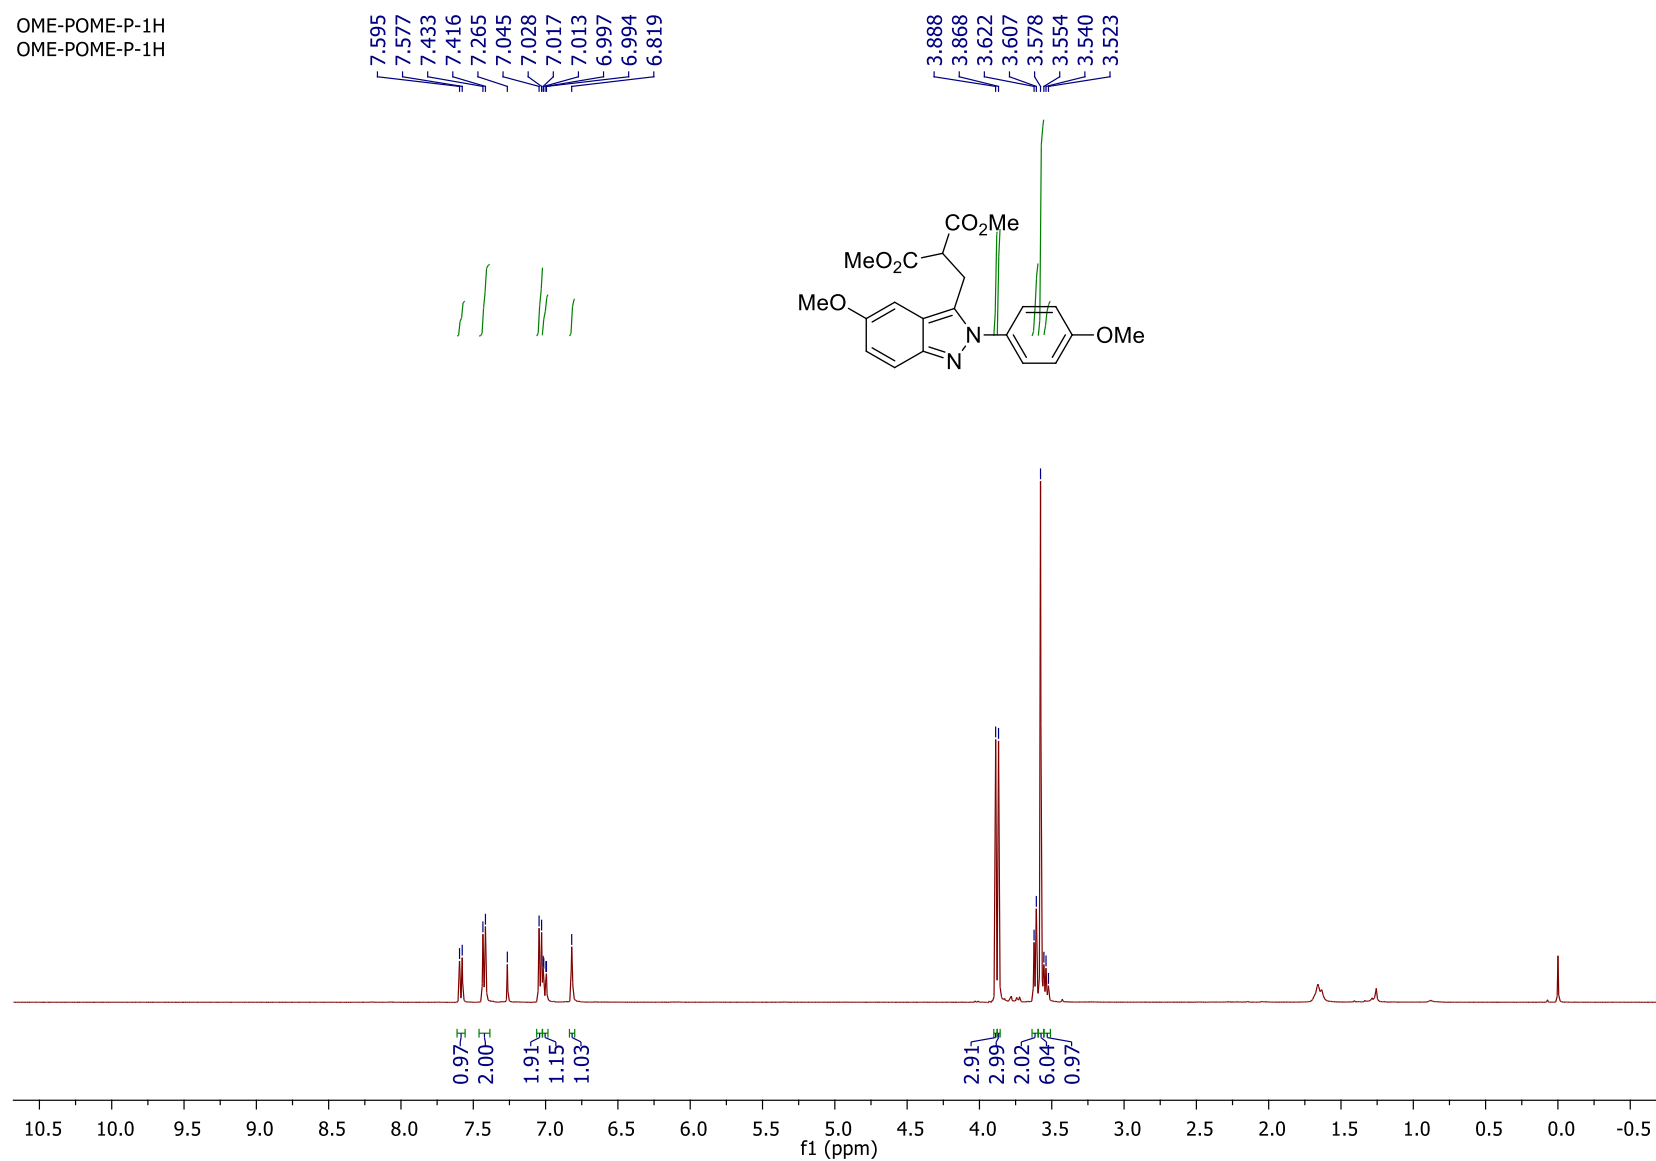

S84

<sup>13</sup>C spectrum of compound **3ef** (125 MHz, CDCl<sub>3</sub>)

OME-POME-P-13C  
OME-POME-P-13C

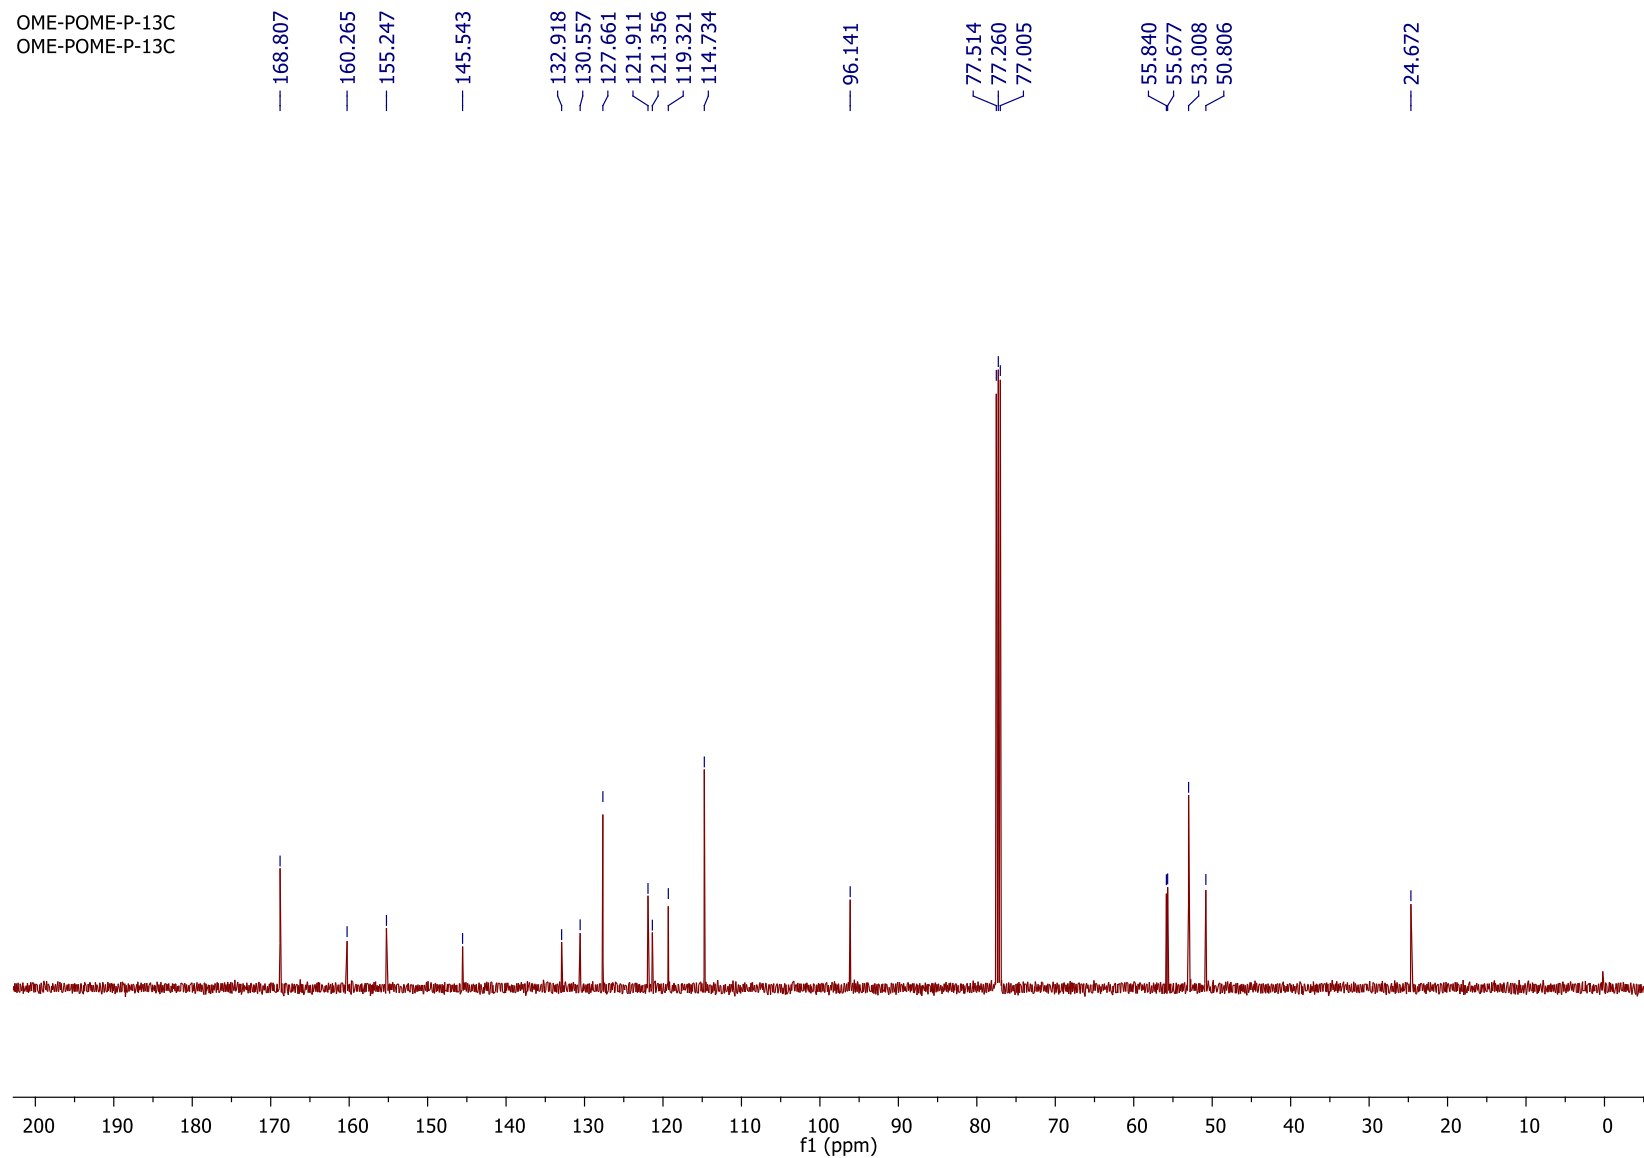

S85

<sup>1</sup>H spectrum of compound **3fa** (400 MHz, CDCl<sub>3</sub>)

DEM-PH-P-1H  
DEM-PH-P-1H

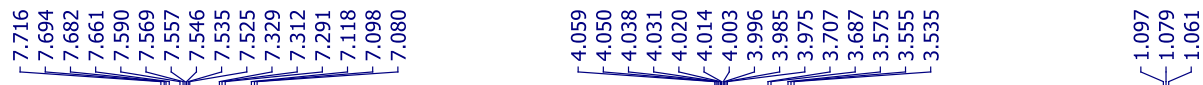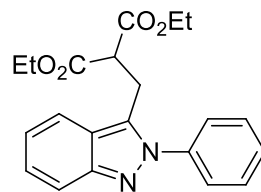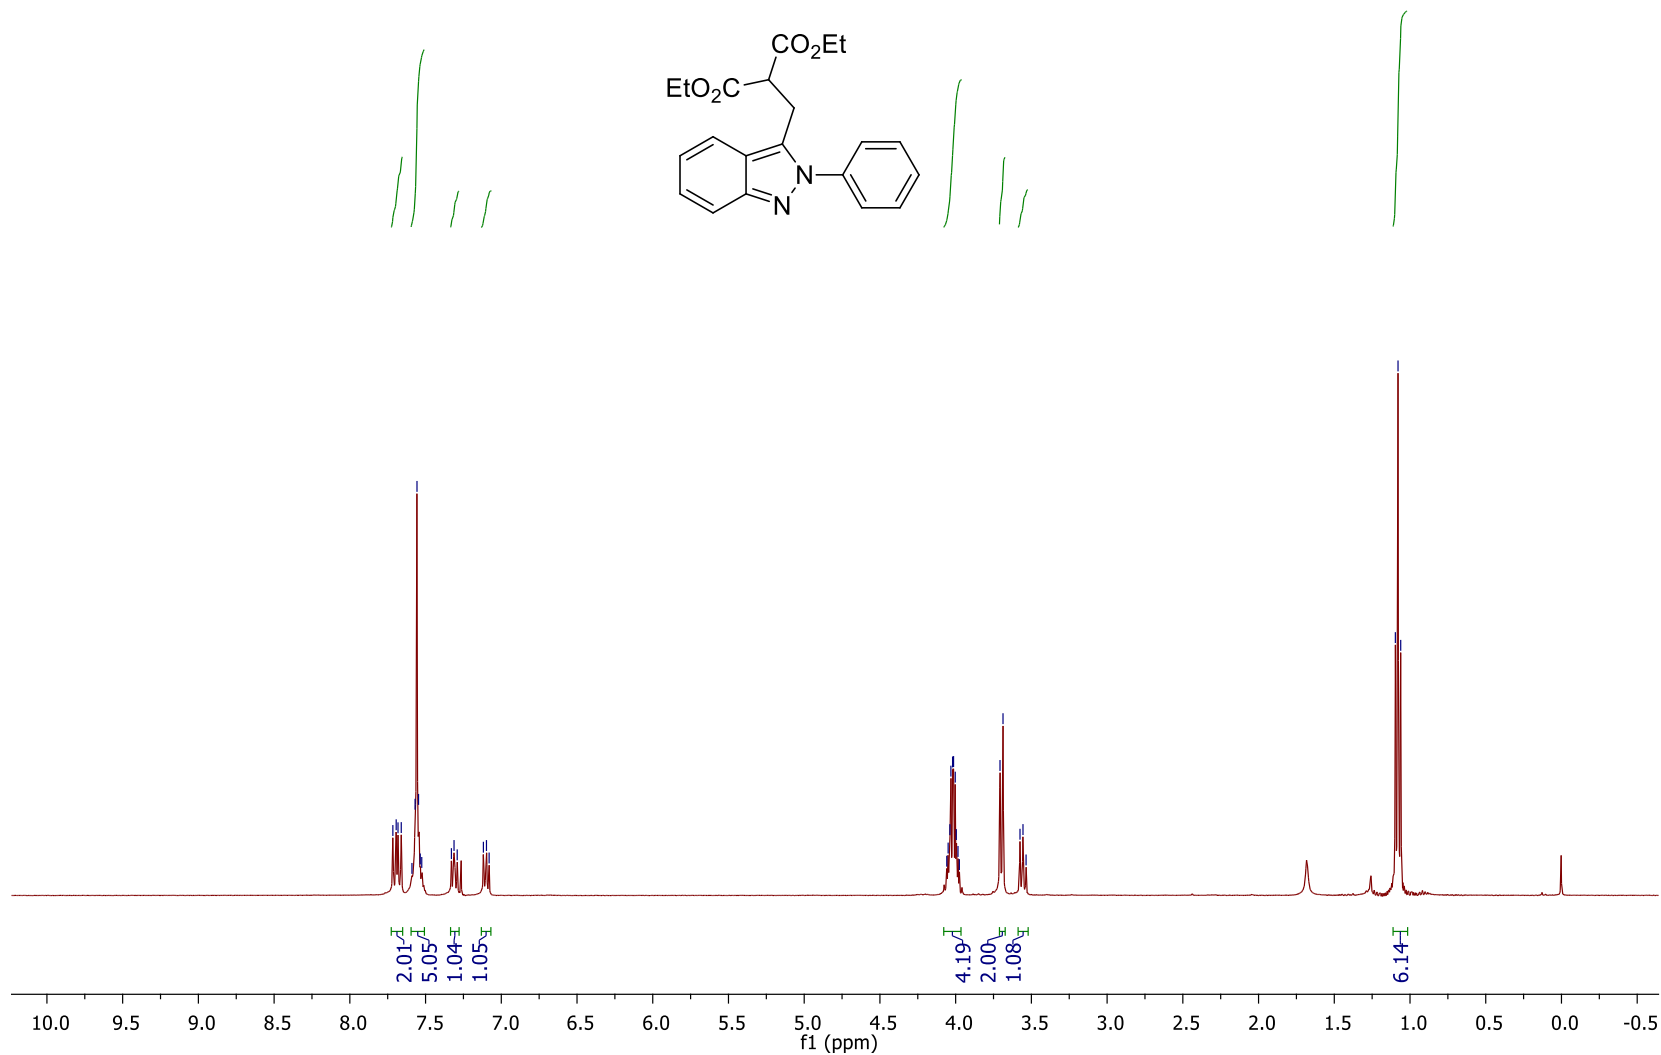

<sup>13</sup>C spectrum of compound **3fa** (100 MHz, CDCl<sub>3</sub>)

DEM-PH-P-13C  
DEM-PH-P-13C

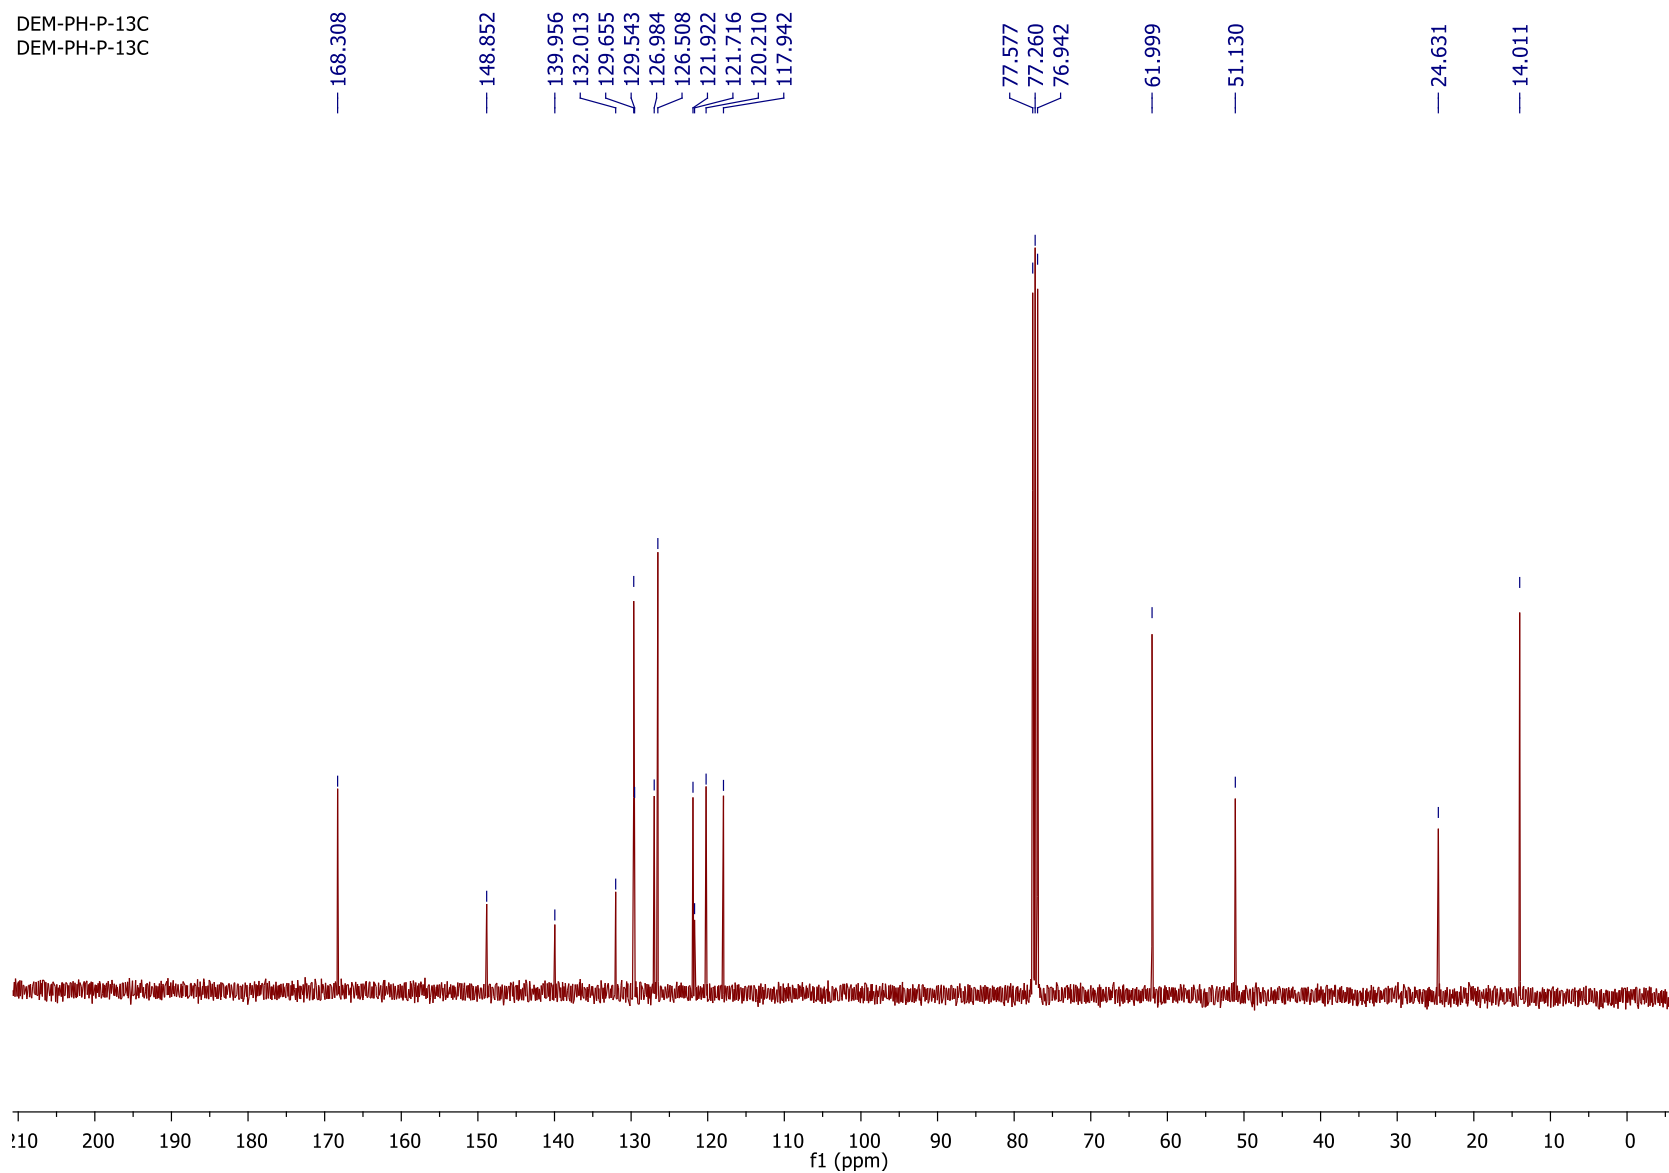

<sup>1</sup>H spectrum of compound **4** (400 MHz, CDCl<sub>3</sub>)

PH-KRP-1H  
PH-KRP-1H

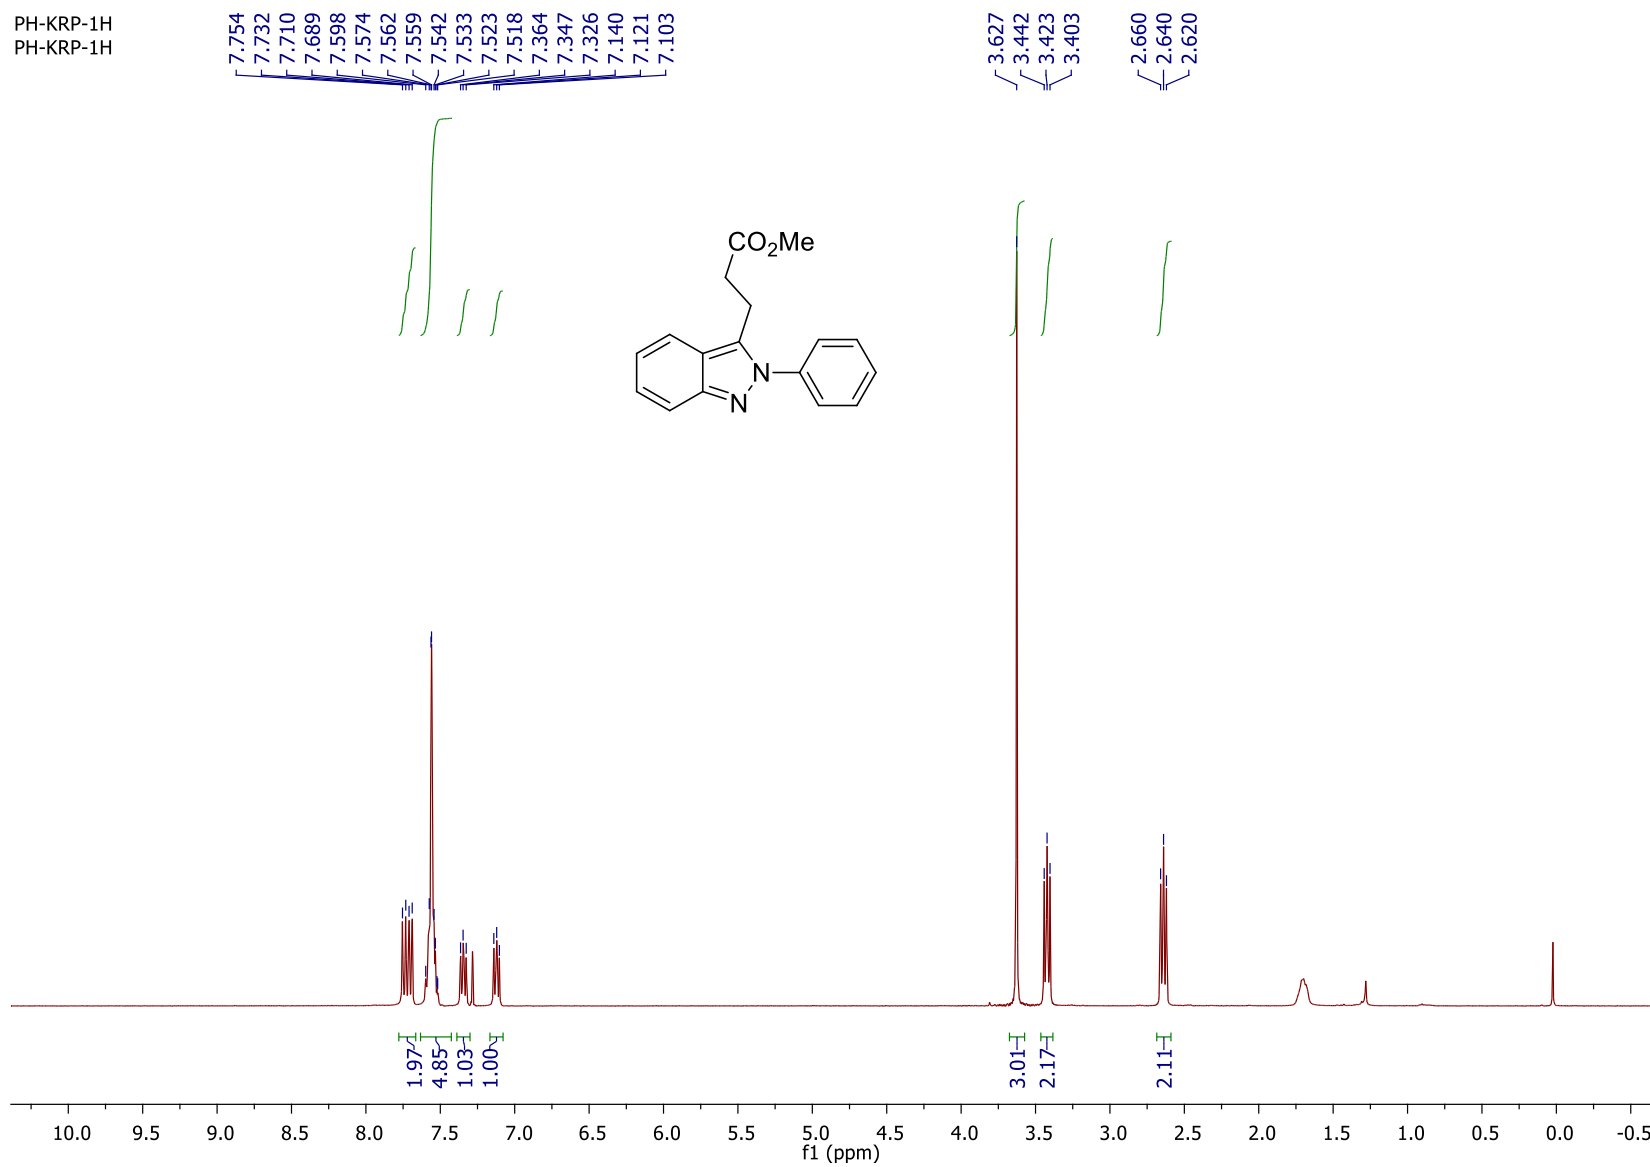



<sup>13</sup>C spectrum of compound **4** (100 MHz, CDCl<sub>3</sub>)

PH-KRP-13C  
PH-KRP-13C

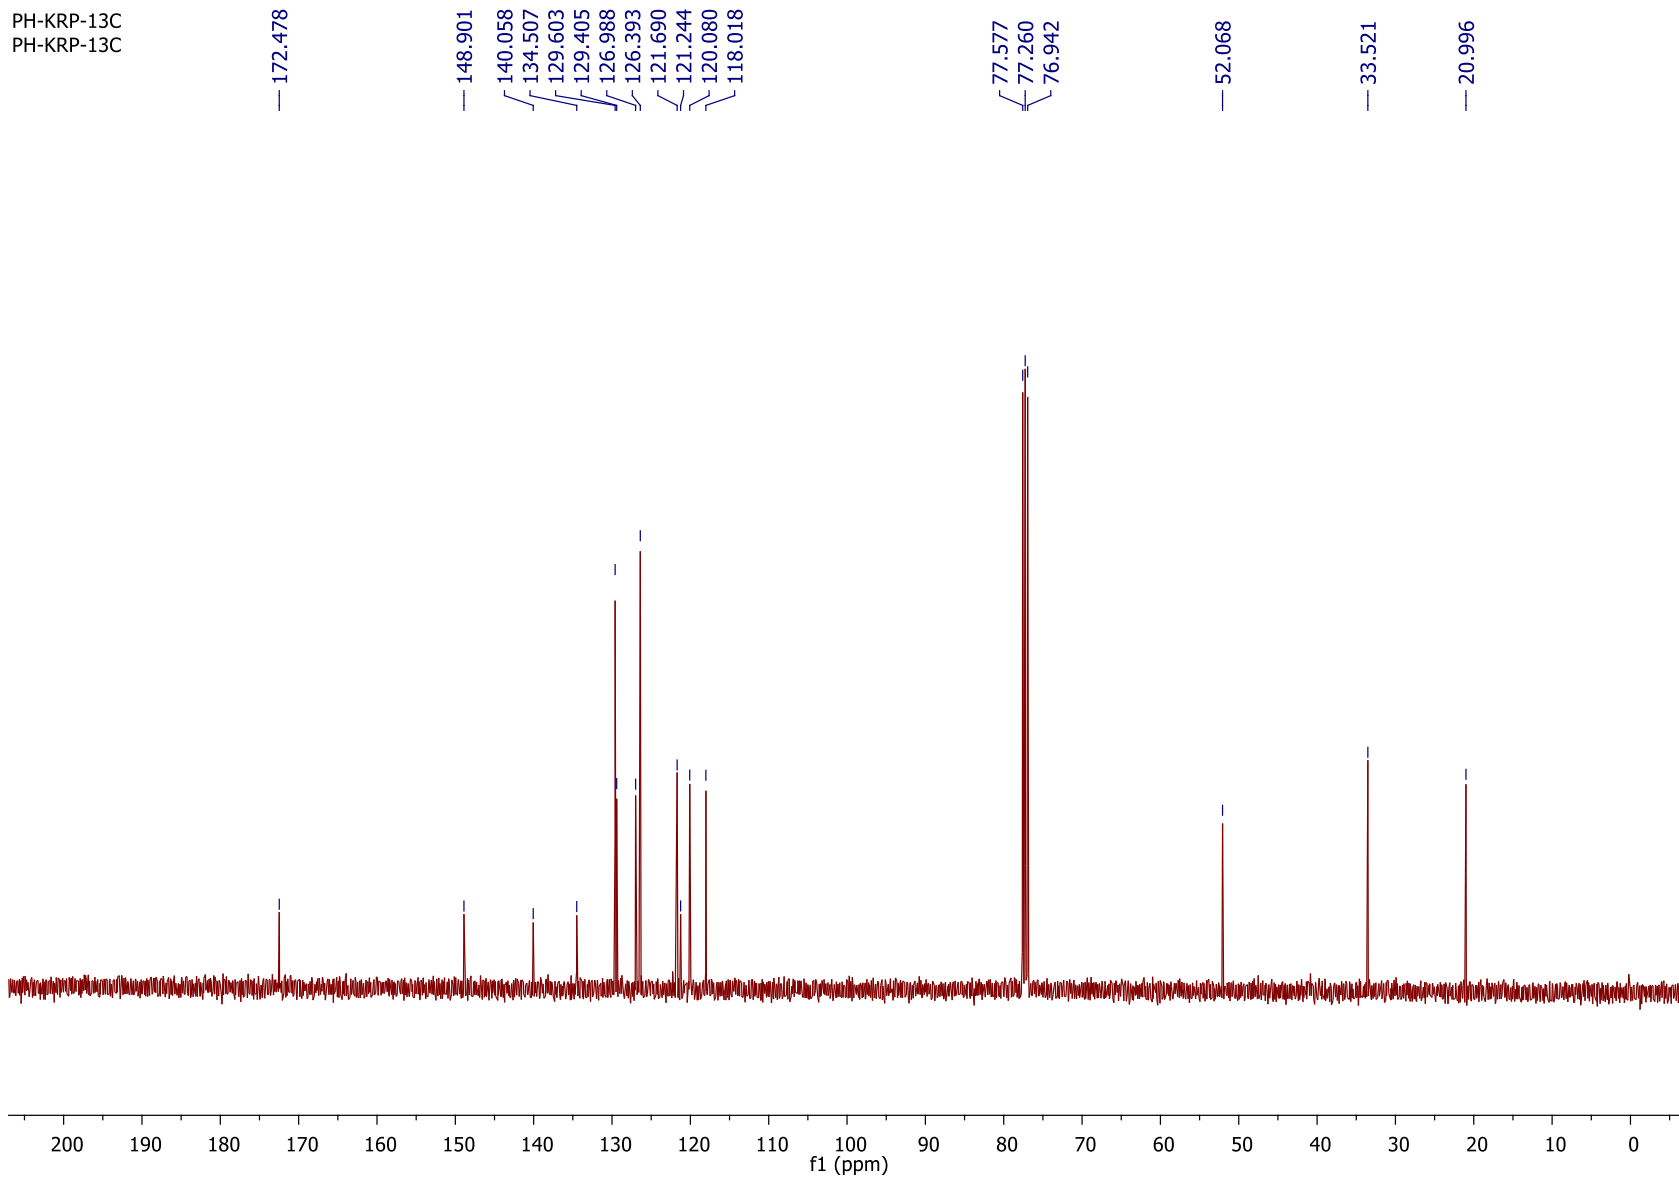

<sup>1</sup>H spectrum of compound **5** (400 MHz, DMSO-d<sub>6</sub>)

PH-COOH-F-1H  
PH-COOH-F-1H

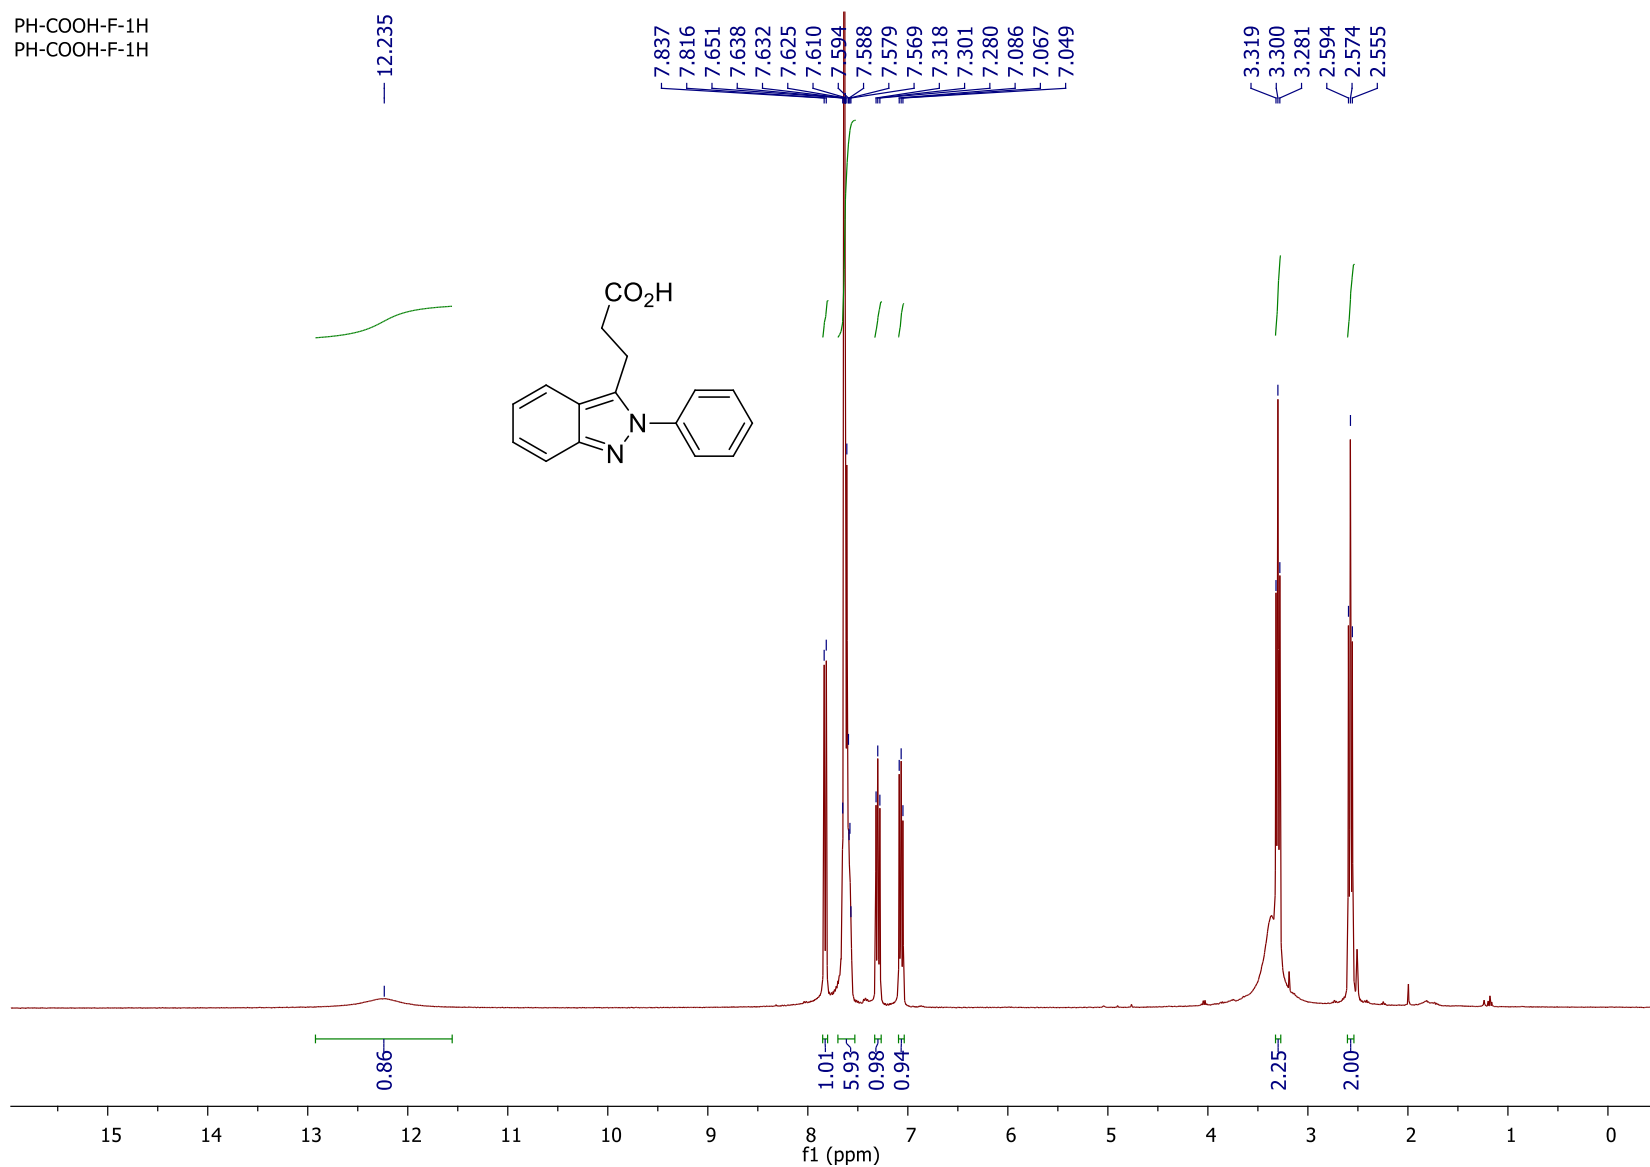

<sup>13</sup>C spectrum of compound **5** (100 MHz, DMSO-d<sub>6</sub>)

PH-COOH-F-13C  
PH-COOH-F-13C

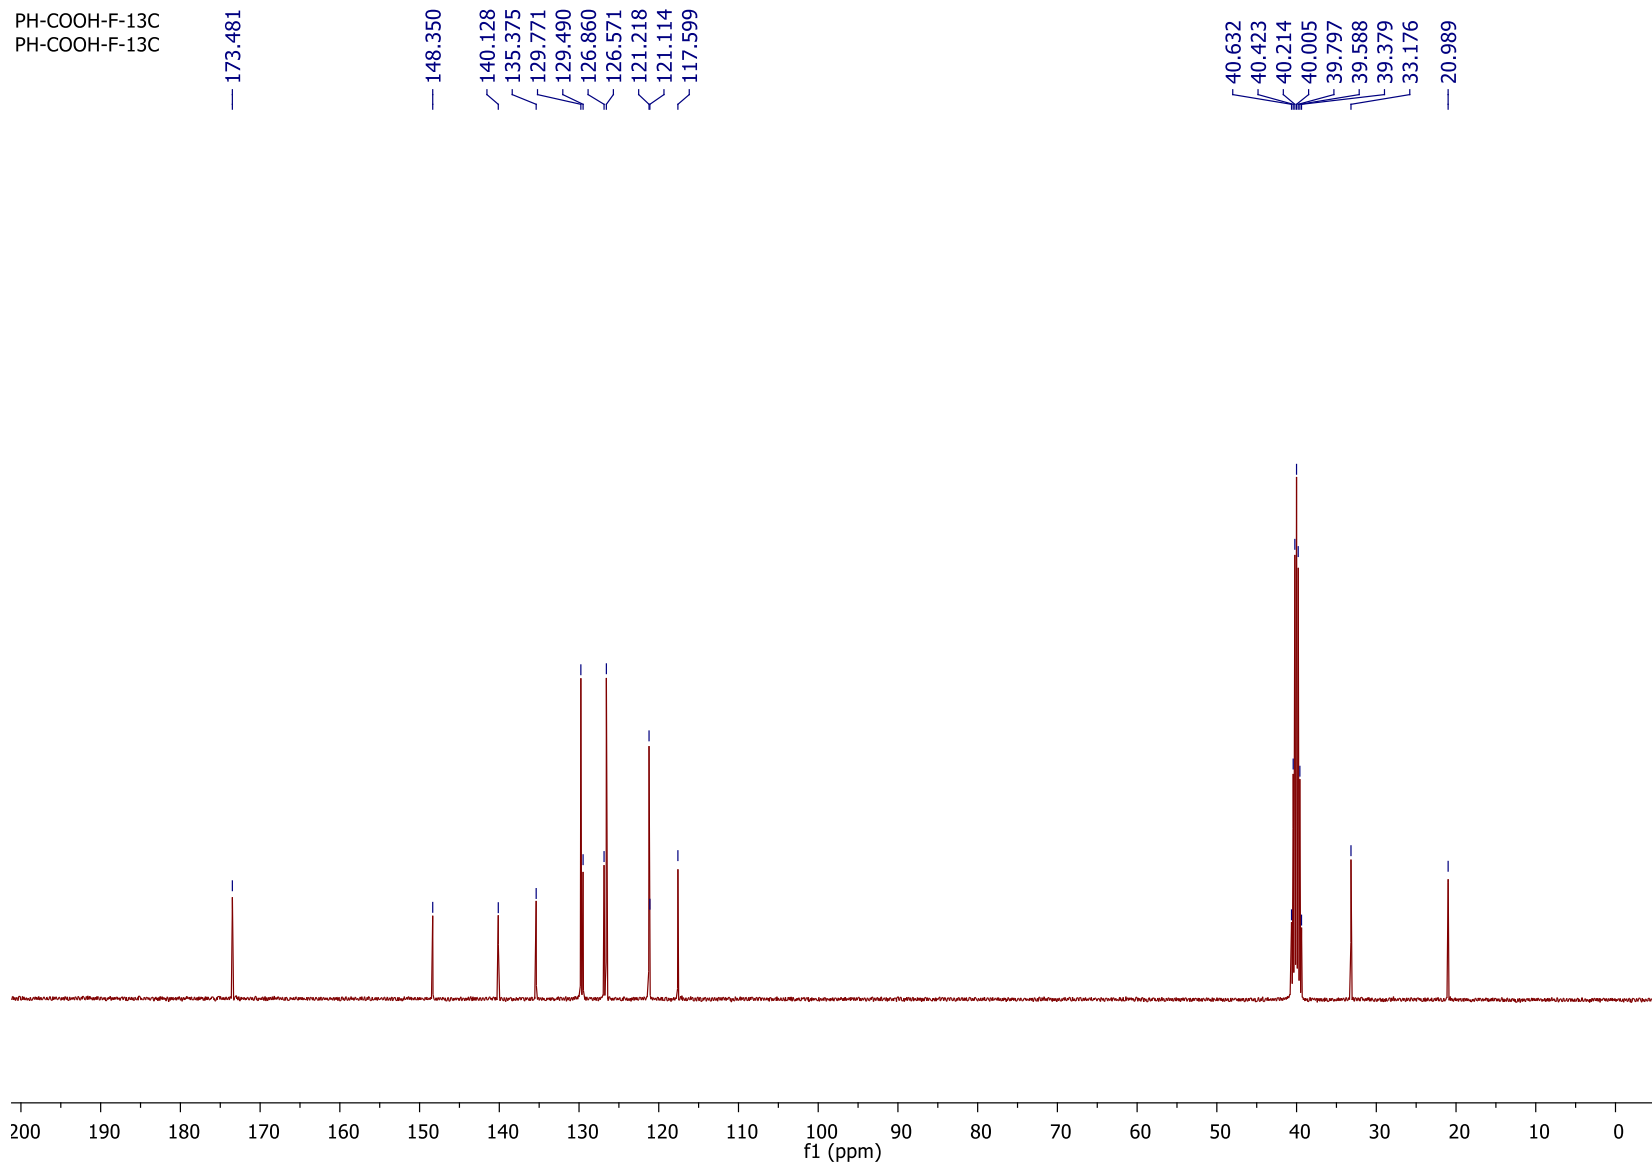

<sup>1</sup>H spectrum of compound **6** (400 MHz, CDCl<sub>3</sub>)

PH-CH<sub>2</sub>OH-1H  
PH-CH<sub>2</sub>OH-1H

7.735  
7.712  
7.705  
7.683  
7.514  
7.509  
7.357  
7.340  
7.319  
7.110  
7.091  
7.072

3.559  
3.553  
3.545  
3.530  
3.170  
3.164  
3.146  
3.127

2.021  
1.892  
1.876  
1.859  
1.844  
1.840  
1.824

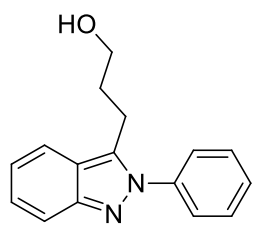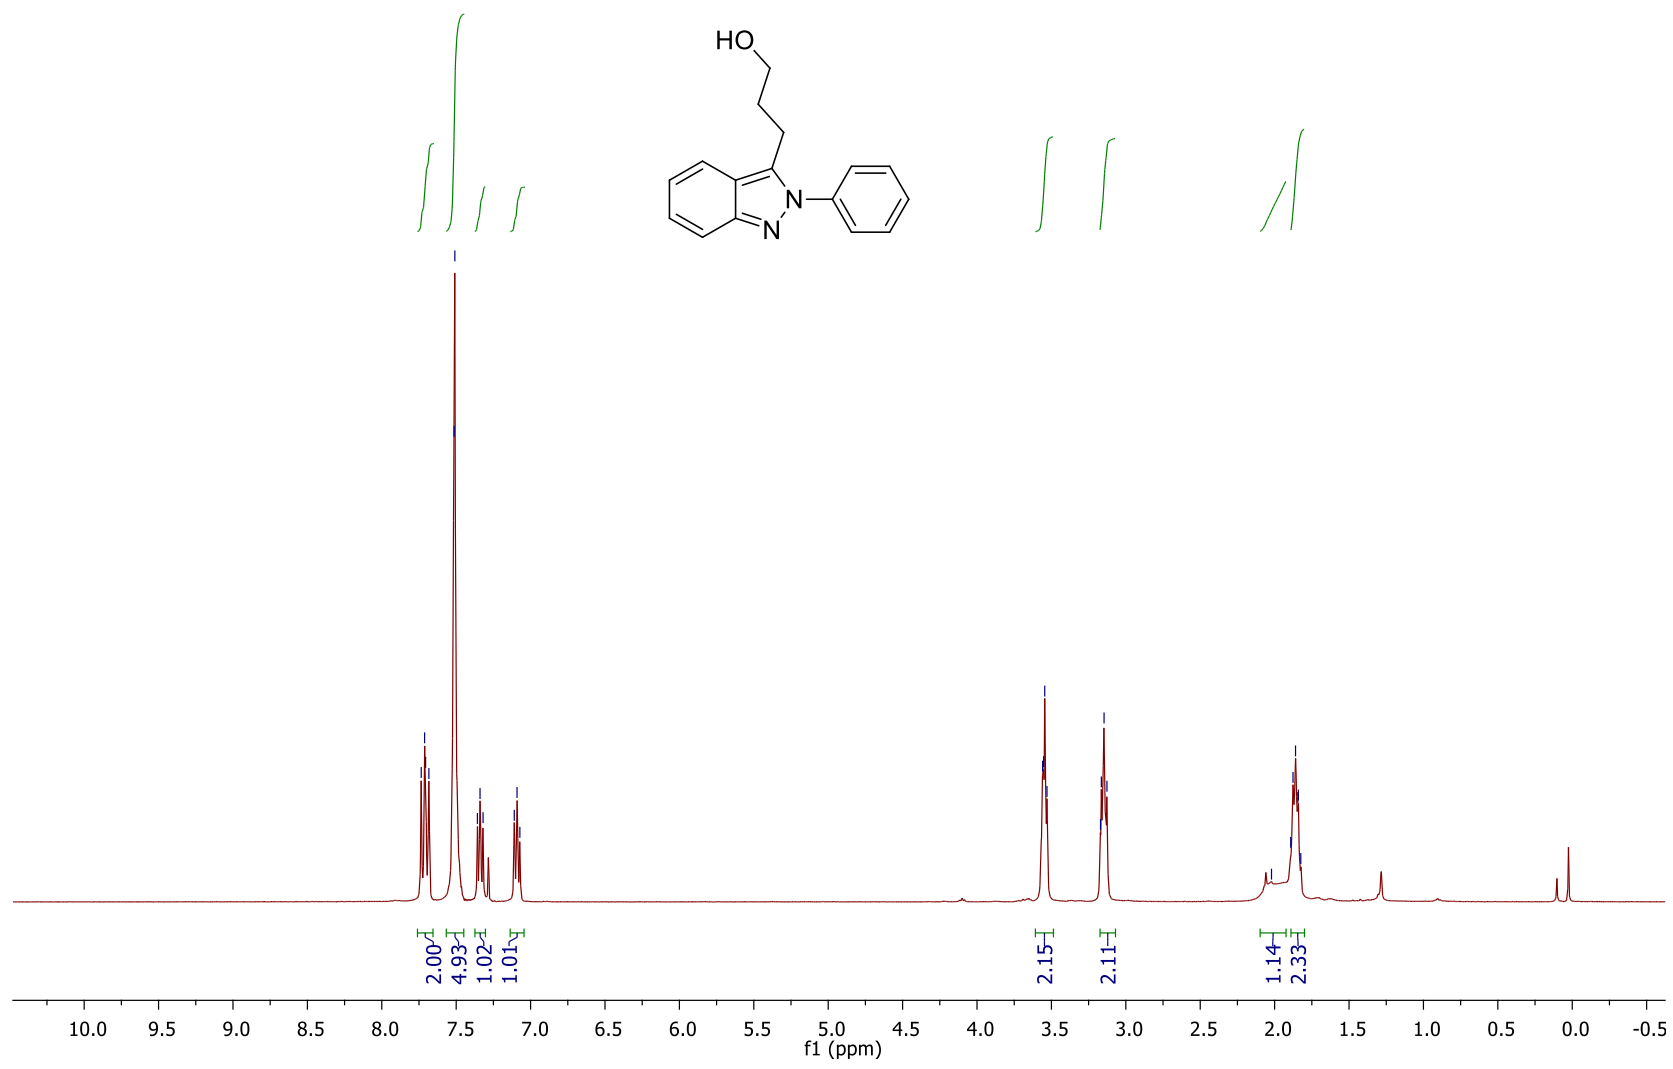

$^{13}\text{C}$  spectrum of compound **6** (100 MHz,  $\text{CDCl}_3$ )

PH-CH<sub>2</sub>OH-13C  
PH-CH<sub>2</sub>OH-13C

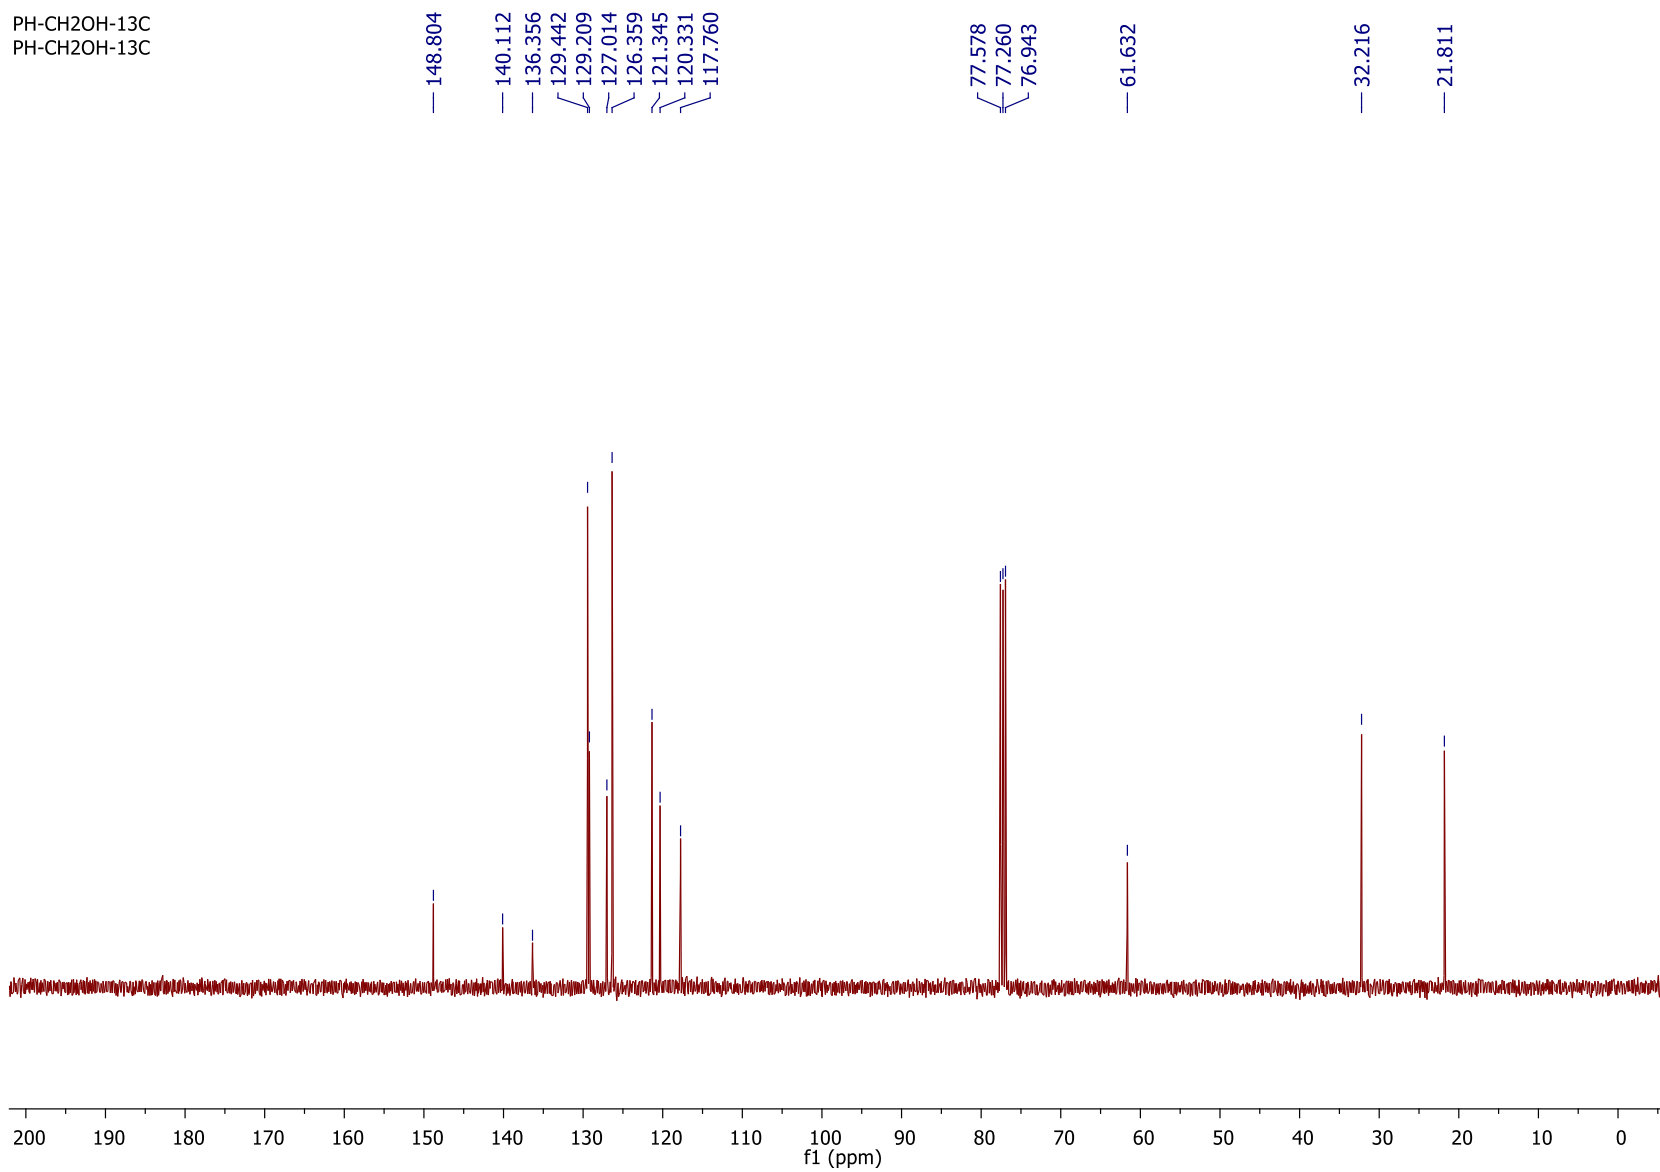

S93

<sup>1</sup>H spectrum of compound **7** (500 MHz, CDCl<sub>3</sub>)

AR-CONH2-1H  
AR-CONH2-1H

7.703  
7.685  
7.667  
7.428  
7.413  
7.390  
7.375  
7.350  
7.335  
7.319  
7.267  
7.257  
7.239  
7.110  
7.095  
7.081  
7.069  
7.053

3.458  
3.442  
3.428  
3.395  
3.381  
3.364  
2.536  
2.520  
2.506  
2.461  
2.447  
2.431

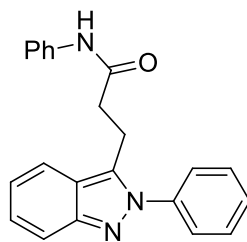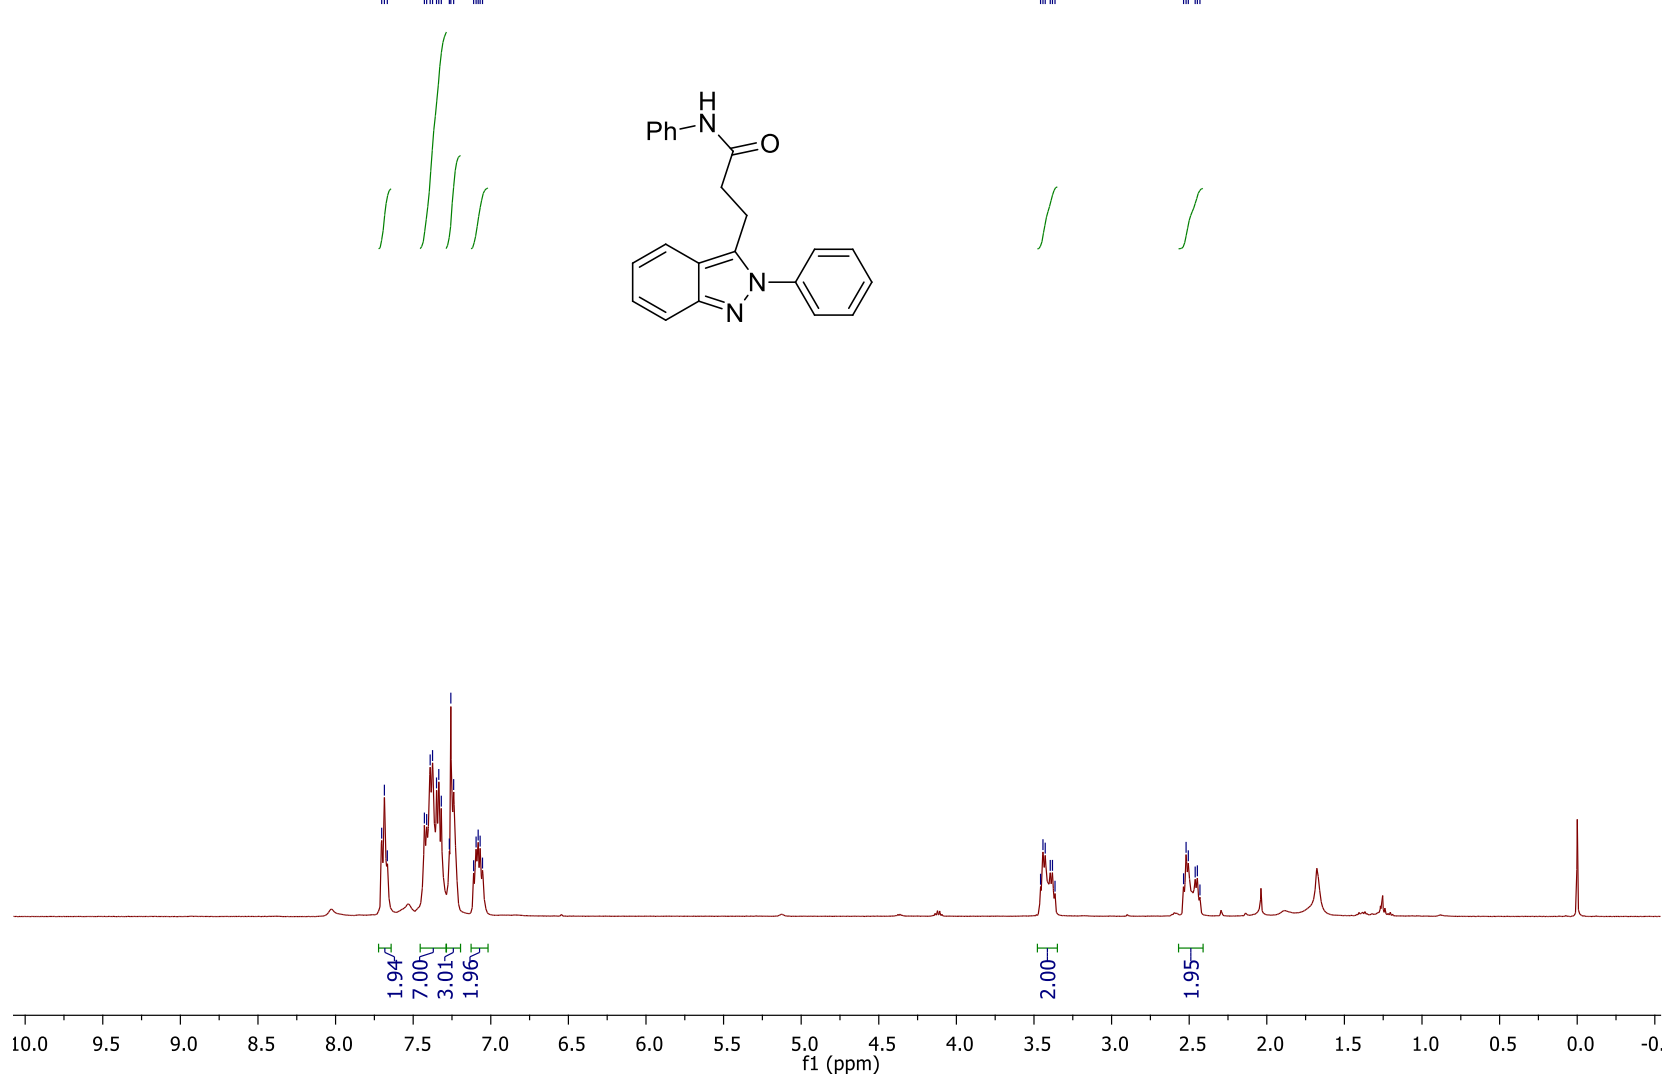

<sup>13</sup>C spectrum of compound **7** (125 MHz, CDCl<sub>3</sub>)

ARC-CONH2-13C  
ARC-CONH2-13C

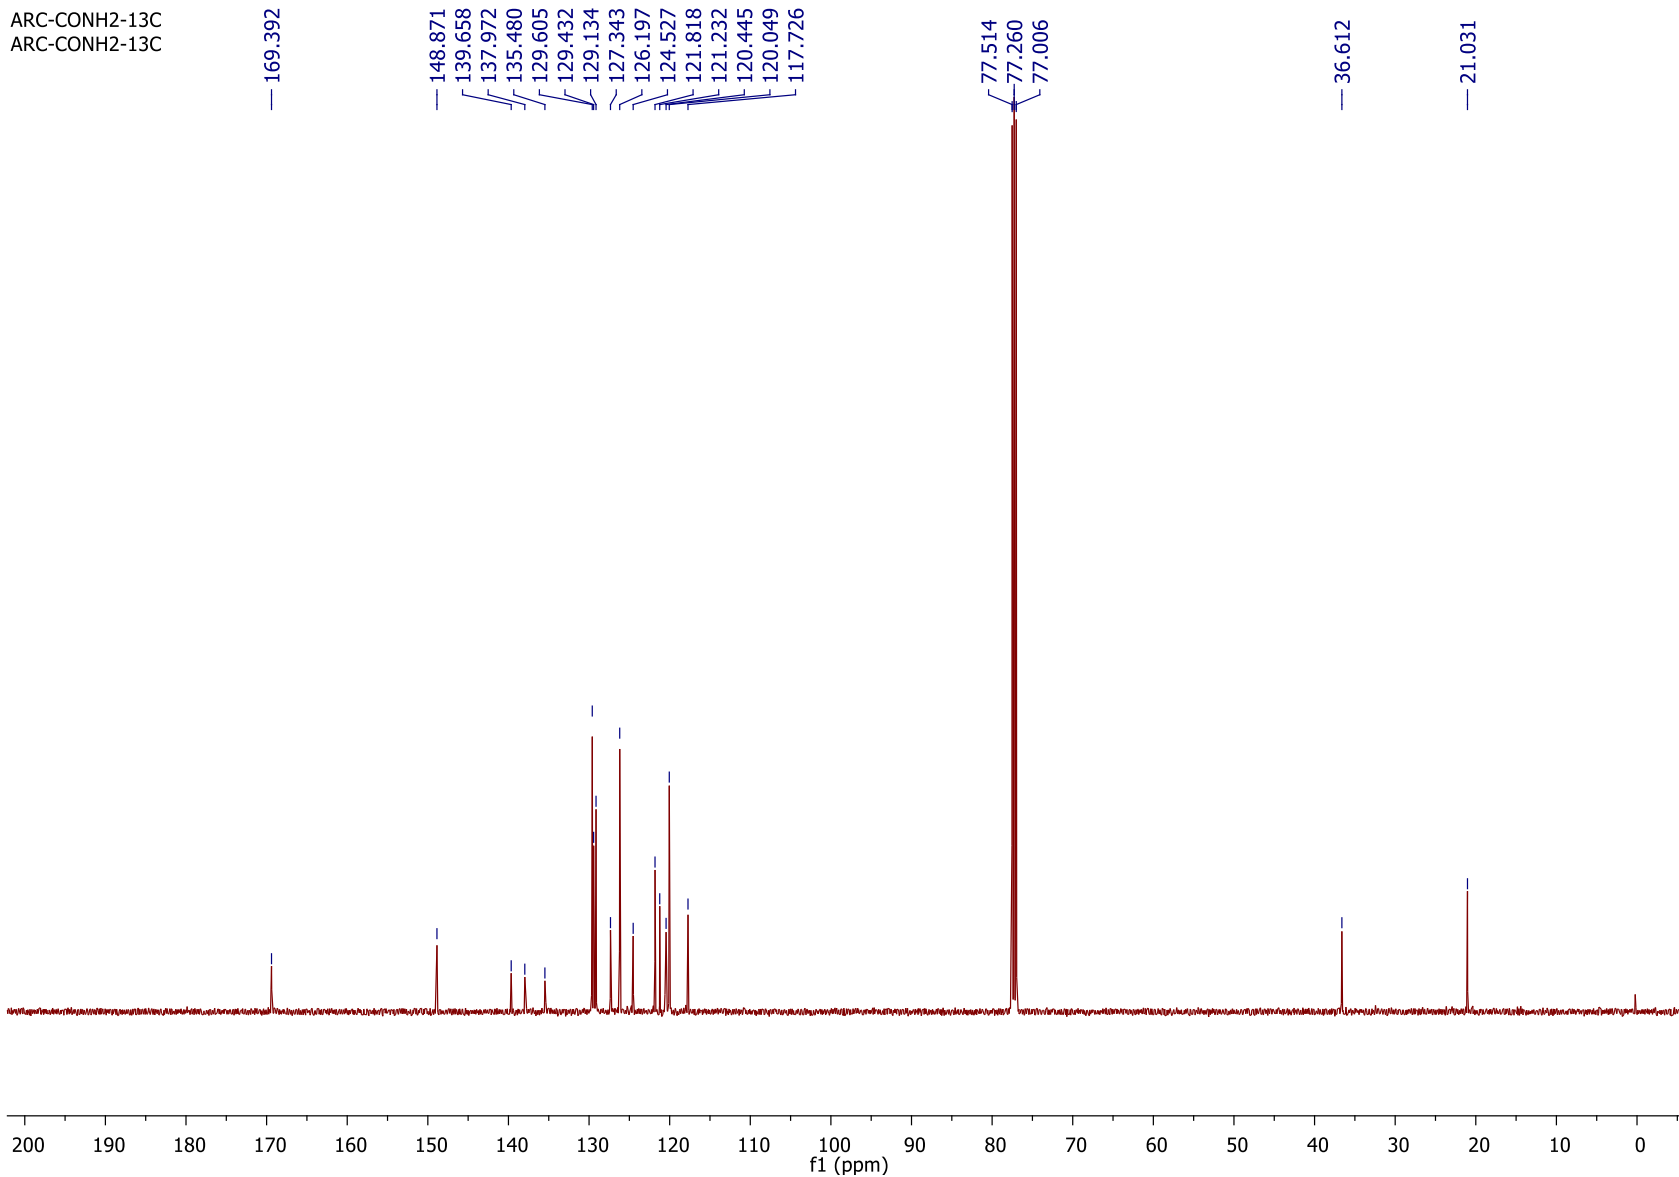

**Table S96: The crystal parameters of compound 3ag**

|                                                     | CCDC 2130146                                                    |
|-----------------------------------------------------|-----------------------------------------------------------------|
| Formula                                             | C <sub>20</sub> H <sub>20</sub> N <sub>2</sub> O <sub>4</sub> S |
| Formula weight                                      | 384.44                                                          |
| <i>T</i> /K                                         | 273(2)                                                          |
| Crystal system                                      | monoclinic                                                      |
| Space group                                         | P 21                                                            |
| <i>a</i> /Å                                         | 5.2570(8)                                                       |
| <i>b</i> /Å                                         | 13.741(2)                                                       |
| <i>c</i> /Å                                         | 13.614(2)                                                       |
| $\alpha$ /°                                         | 90                                                              |
| $\beta$ /°                                          | 94.765(4)                                                       |
| $\gamma$ /°                                         | 90                                                              |
| <i>V</i> /Å <sup>3</sup>                            | 980.0(3)                                                        |
| <i>Z</i>                                            | 2                                                               |
| Abs. Coeff./mm <sup>-1</sup>                        | 0.193                                                           |
| Abs. Correction                                     | none                                                            |
| GOF on <i>F</i> <sup>2</sup>                        | 1.318                                                           |
| Final <i>R</i> indices [ <i>I</i> > 2σ( <i>I</i> )] | <i>R</i> 1 = 0.0892<br><i>wR</i> 2 = 0.1055                     |
| <i>R</i> indices [all data]                         | <i>R</i> 1 = 0.1953<br><i>wR</i> 2 = 0.2045                     |



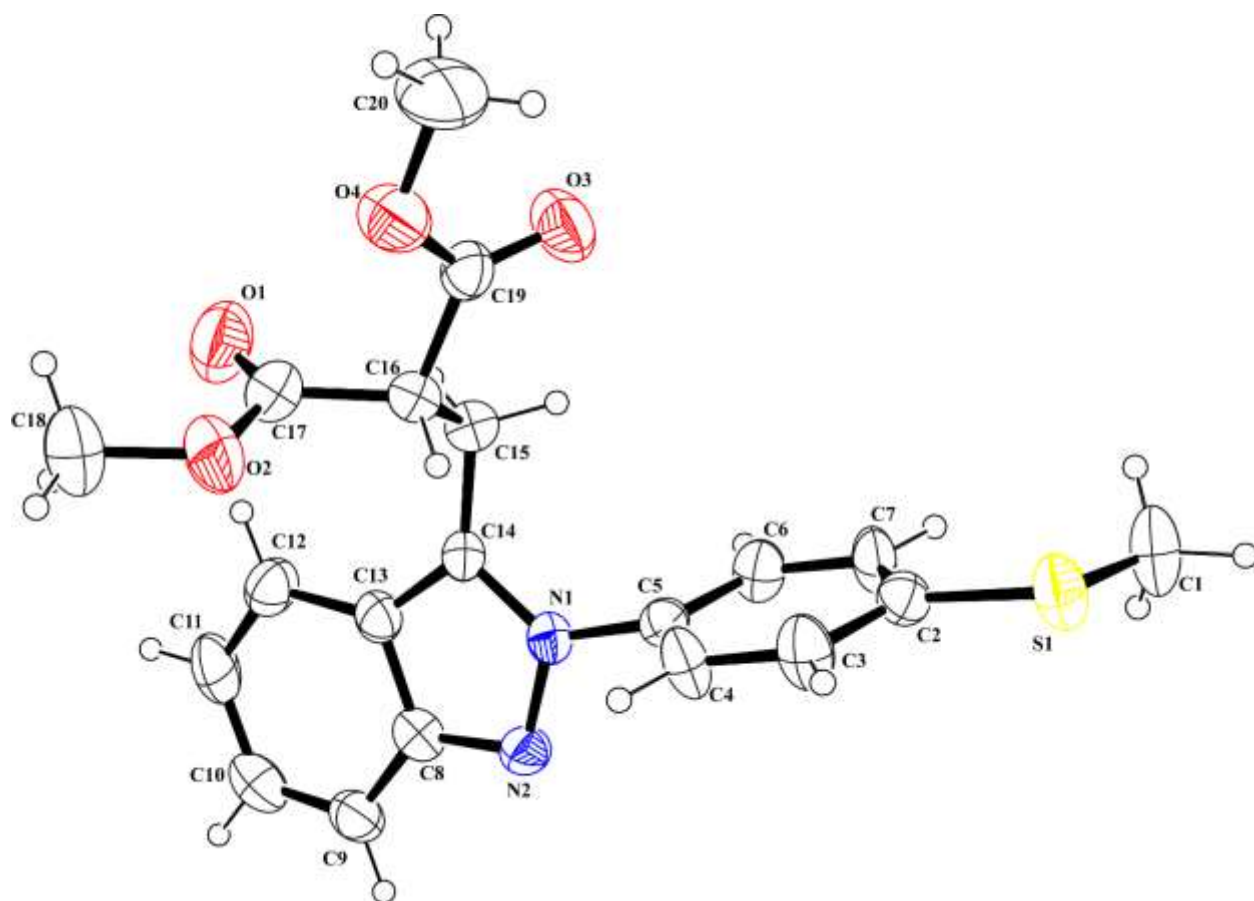

Figure S97: ORTEP diagram of compound 3ag using thermal ellipsoids of 35% probability

## References

1. H. Cui, X. Peng, J. Liu, C. Ma, Y. Ji, W. Zhang, M. Geng and Y. Li, *Bioorg. Med. Chem. Lett.* 2016, **26**, 4483–4486.
2. J. S. Stover, J. Shi, W. Jin, P. K. Vogt and D. L. Boger, *J. Am. Chem. Soc.* 2009, **131**, 3342–3348.
3. K. L. Ivanov, M. Y. Melnikov and E. M. Budynina, *Org. Lett.* 2019, **21**, 4464–4468.
4. D. Dev, N. B. Palakurthy, K. Thalluri, J. Chandra and B. Mandal, *J. Org. Chem.* 2014, **79**, 5420-5431.
